# Supplementary material for: New Insights of Salicylic Acid Into Stamen Abortion of Female Flowers in Tung Tree (Vernicia fordii)
Source: Front Genet. 2019 Apr 5;10:316. doi: 10.3389/fgene.2019.00316 (PMC6460477; doi:10.3389/fgene.2019.00316)
Supplement: TABLE S3 — Stage-specific genes analysis in male and female flowers. [file Table_3.XLSX]

## Sheet: Sheet1
Supplementary Table S3 Stage-specific genes analysis in male and female flowers
Sample	Gene ID	C1-FPKM	C2-FPKM	C3-FPKM	X1-FPKM	X2-FPKM	X3-FPKM	Swiss-Prot_annotation	NR_annotation
C1-specific	VF28082	3.25482	0	0	0	0	0	--	hypothetical protein JCGZ_23690 [Jatropha curcas]
	VF28031	50.7677	8.27342	5.37438	18.2884	4.74943	3.62561	Heat stress transcription factor C-1 GN=MOB24.9 OS=Arabidopsis thaliana (Mouse-ear cress) PE=2 SV=1	hypothetical protein JCGZ_07238 [Jatropha curcas]
	VF27953	36.8424	7.87512	7.36073	17.6356	7.78932	7.825	--	hypothetical protein JCGZ_07173 [Jatropha curcas]
	VF27768	4.88754	1.89686	1.94625	1.12361	1.67582	1.28943	Pentatricopeptide repeat-containing protein At1g08070 GN=PCMP-H12 OS=Arabidopsis thaliana (Mouse-ear cress) PE=2 SV=1	pentatricopeptide repeat-containing protein, putative [Ricinus communis]
	VF27562	4.7281	0.494824	2.17583	0.4984	1.45737	0.466157	--	hypothetical protein JCGZ_24876 [Jatropha curcas]
	VF27383	3.2587	0.061431	0	1.20303	0	0	--	transcription elongation factor s-II, putative [Ricinus communis]
	VF27241	2.09487	0.000759383	0.000217145	2.67157e-05	0.000559072	0.000118836	Nucleolar GTP-binding protein 1 GN=At1g50920 OS=Arabidopsis thaliana (Mouse-ear cress) PE=2 SV=1	hypothetical protein JCGZ_25919 [Jatropha curcas]
	VF27201	1.31213	0	0.082833	0.511567	0.426096	0.112801	--	hypothetical protein JCGZ_25957 [Jatropha curcas]
	VF25846	4.38163	0	0	0.722209	0	0	Germin-like protein 9-3 (Precursor) OS=Oryza sativa subsp. japonica (Rice) PE=2 SV=1	PREDICTED: putative germin-like protein 9-2 [Prunus mume]
	VF25434	1.18675	0	0.084581	0	0.0852585	0	--	conserved hypothetical protein [Ricinus communis]
	VF25397	34.5249	14.2825	12.7755	15.0237	10.0749	10.7916	--	hypothetical protein POPTR_0005s17030g [Populus trichocarpa]
	VF25198	1.32066	0.272901	0.574564	0.470918	0.389608	0.275917	--	hypothetical protein JCGZ_12616 [Jatropha curcas]
	VF24620	1.22555	0	0	0.612117	0.162442	0	Putative F-box protein At1g67623 GN=At1g67623 OS=Arabidopsis thaliana (Mouse-ear cress) PE=3 SV=1	F-box family protein [Populus trichocarpa]
	VF23707	6.75915	2.31715	1.04174	2.74251	1.2896	1.23193	3-ketoacyl-CoA synthase 21 GN=KCS21 OS=Arabidopsis thaliana (Mouse-ear cress) PE=2 SV=1	PREDICTED: 3-ketoacyl-CoA synthase 21-like [Populus euphratica]
	VF22943	59.0235	27.7589	21.8747	26.9353	24.1658	14.9993	H/ACA ribonucleoprotein complex subunit 4 GN=F24I3.230 OS=Arabidopsis thaliana (Mouse-ear cress) PE=1 SV=1	hypothetical protein JCGZ_13359 [Jatropha curcas]
	VF22926	4.91779	0.840623	0.570578	0.765127	0.375499	0.557413	--	monovalent cation:proton antiporter, putative [Ricinus communis]
	VF22846	38.9655	6.67616	7.34827	11.5041	4.61806	18.9805	--	hypothetical protein JCGZ_17604 [Jatropha curcas]
	VF22781	291.882	13.1777	8.66242	134.116	6.82909	3.43252	--	hypothetical protein JCGZ_04823 [Jatropha curcas]
	VF22597	1.28927	0	0.201793	0.19035	0.174983	0.50553	--	calcium ion binding protein, putative [Ricinus communis]
	VF22324	5.25403	0.0108687	8.01884e-05	0.0492197	1.4176	0.00137153	Protein EXORDIUM-like 2 (Precursor) GN=EXL2 OS=Arabidopsis thaliana (Mouse-ear cress) PE=2 SV=1	hypothetical protein JCGZ_24914 [Jatropha curcas]
	VF21799	10.9957	1.17279	1.63925	1.51776	0	1.96737	Anthocyanidin 5,3-O-glucosyltransferase GN=RhGT1 OS=Rosa hybrid cultivar PE=2 SV=1	hypothetical protein JCGZ_16903 [Jatropha curcas]
	VF21761	2.98671	0.728689	0	0.198149	2.78011e-135	0	--	UDP-glucosyltransferase, putative [Ricinus communis]
	VF21012	659.677	226.772	255.878	314.779	289.808	315.839	Dolichyl-diphosphooligosaccharide--protein glycosyltransferase subunit 4A GN=OST4A OS=Oryza sativa subsp. japonica (Rice) PE=3 SV=1	unnamed protein product [Vitis vinifera]
	VF20878	1.01992	0.254711	0.153517	0.450708	0.170128	0.216111	G-type lectin S-receptor-like serine/threonine-protein kinase RLK1 (Precursor) GN=RLK1 OS=Arabidopsis thaliana (Mouse-ear cress) PE=2 SV=2	BRASSINOSTEROID INSENSITIVE 1-associated receptor kinase 1 precursor, putative [Ricinus communis]
	VF20818	2.71311	0	0	1.02369	0.470736	0	B3 domain-containing protein At2g33720 GN=At2g33720 OS=Arabidopsis thaliana (Mouse-ear cress) PE=2 SV=1	hypothetical protein POPTR_0004s09870g [Populus trichocarpa]
	VF20694	9.26612	0	3.89527	1.19613	0.283742	2.33642	RPM1-interacting protein 4 GN=RIN4 OS=Arabidopsis thaliana (Mouse-ear cress) PE=1 SV=1	NOI, putative [Ricinus communis]
	VF20294	6.916	0	0	0	0	0	--	conserved hypothetical protein [Ricinus communis]
	VF19823	3.87918	1.52903	1.6381	1.63891	1.26709	1.528	Pentatricopeptide repeat-containing protein At2g40720 GN=PCMP-E26 OS=Arabidopsis thaliana (Mouse-ear cress) PE=3 SV=1	PREDICTED: pentatricopeptide repeat-containing protein At2g40720 [Populus euphratica]
	VF17674	13.0517	1.31612	0.0901274	3.46786	5.17282	5.58876	24-methylenesterol C-methyltransferase 2 GN=F14O10.7 OS=Arabidopsis thaliana (Mouse-ear cress) PE=1 SV=2	hypothetical protein JCGZ_13070 [Jatropha curcas]
	VF17377	4.83017	1.61128	1.42077	2.29504	1.25486	1.59149	Pentatricopeptide repeat-containing protein At4g32430, mitochondrial (Precursor) GN=F8B4.130 OS=Arabidopsis thaliana (Mouse-ear cress) PE=2 SV=1	hypothetical protein JCGZ_13317 [Jatropha curcas]
	VF17313	55.5699	0.073647	0.133796	27.5635	4.08354	0.170553	--	PREDICTED: aspartic proteinase CDR1-like [Camelina sativa]
	VF17254	10.4995	0.000122387	4.30901e-08	3.0873	0.049647	1.89271	--	hypothetical protein JCGZ_26255 [Jatropha curcas]
	VF16761	1.31315	0.35202	0.26077	4.97574e-08	0.500745	9.40769e-16	Pentatricopeptide repeat-containing protein At2g32630 GN=At2g32630 OS=Arabidopsis thaliana (Mouse-ear cress) PE=3 SV=1	pentatricopeptide repeat-containing protein, putative [Ricinus communis]
	VF16628	16.9192	1.33653	7.19393	4.02398	1.00578	3.21674	--	conserved hypothetical protein [Ricinus communis]
	VF16106	2.40203	0.131099	0.157283	1.12615	0.38027	0.718155	--	conserved hypothetical protein [Ricinus communis]
	VF15073	5.26475	0	0	0	0	0	--	serine-threonine protein kinase, plant-type, putative [Ricinus communis]
	VF14940	47.7107	1.35459	0.887913	15.1706	1.72775	0.348563	--	hypothetical protein JCGZ_07459 [Jatropha curcas]
	VF14813	2.11888	0.544914	0.672001	2.32308e-05	0.214267	7.02774e-05	Pentatricopeptide repeat-containing protein At1g03560, mitochondrial (Precursor) GN=At1g03560 OS=Arabidopsis thaliana (Mouse-ear cress) PE=2 SV=1	hypothetical protein JCGZ_25827 [Jatropha curcas]
	VF14746	9.74527	1.82572	1.0175	4.38172	0.770908	4.25906	--	hypothetical protein JCGZ_25727 [Jatropha curcas]
	VF14501	371.142	10.6968	5.92615	161.926	43.6638	17.7114	Non-specific lipid-transfer protein 8 (Precursor) GN=LTP8 OS=Arabidopsis thaliana (Mouse-ear cress) PE=3 SV=1	Nonspecific lipid-transfer protein precursor, putative [Ricinus communis]
	VF14423	5.31311	1.82423	2.1257	2.14407	1.63493	1.74412	Putative pentatricopeptide repeat-containing protein At4g17915 GN=At4g17915 OS=Arabidopsis thaliana (Mouse-ear cress) PE=3 SV=1	pentatricopeptide repeat-containing protein, putative [Ricinus communis]
	VF14050	299.561	99.9871	137.176	122.665	120.286	119.391	Membrane magnesium transporter (Precursor) GN=At5g03345 OS=Arabidopsis thaliana (Mouse-ear cress) PE=2 SV=1	conserved hypothetical protein [Ricinus communis]
	VF13808	1.85202	0.379394	0.00555983	0.132377	0.585293	0.355056	--	hypothetical protein JCGZ_15892 [Jatropha curcas]
	VF13564	214.059	43.1715	64.5953	74.24	51.1313	69.4233	Methionine gamma-lyase GN=MGL OS=Arabidopsis thaliana (Mouse-ear cress) PE=1 SV=1	hypothetical protein JCGZ_20358 [Jatropha curcas]
	VF13520	6.96268	0.00023307	0.00315202	0.233798	0.404049	0.583847	Cyclin-dependent kinase E-1 GN=MBK5.8 OS=Arabidopsis thaliana (Mouse-ear cress) PE=1 SV=2	hypothetical protein JCGZ_20418 [Jatropha curcas]
	VF13334	9.5539	0	0	0	0	0	Pentatricopeptide repeat-containing protein At4g30700 GN=T10C21.50 OS=Arabidopsis thaliana (Mouse-ear cress) PE=2 SV=1	pentatricopeptide repeat-containing protein, putative [Ricinus communis]
	VF12782	2.85059	0	0.0280303	1.39317	0.171626	0	NAC domain-containing protein 72 GN=F27G19.10 OS=Arabidopsis thaliana (Mouse-ear cress) PE=2 SV=1	NAC transcription factor 077 [Jatropha curcas]
	VF12693	1579.91	445.207	561.415	626.158	441.874	460.269	RING-box protein 1a GN=F7C8.160 OS=Arabidopsis thaliana (Mouse-ear cress) PE=1 SV=1	RBX1 [Hevea brasiliensis]
	VF12674	1.86547	0.475108	0.374476	0.91416	0.296299	0.710084	High-affinity nitrate transporter 2.1 GN=At1g08090 OS=Arabidopsis thaliana (Mouse-ear cress) PE=1 SV=1	PREDICTED: high affinity nitrate transporter 2.4-like [Nicotiana sylvestris]
	VF12391	1.94576	0.544885	0.250262	0.269118	0.748105	0	Enhancer of mRNA-decapping protein 4 GN=MDC11.13 OS=Arabidopsis thaliana (Mouse-ear cress) PE=1 SV=1	conserved hypothetical protein [Ricinus communis]
	VF12285	2.59206	0.570571	0.910405	0.946151	0.748906	0.35424	Carrot ABA-induced in somatic embryos 3 {ECO:0000303|Ref.1} OS=Daucus carota (Wild carrot) PE=2 SV=1	hypothetical protein JCGZ_00457 [Jatropha curcas]
	VF11951	242.04	74.3141	29.7905	108.653	103.206	35.5609	--	conserved hypothetical protein [Ricinus communis]
	VF11950	9.59412	1.89043	0.000132442	0.000135041	0.000856853	0.000125925	Transcription factor TCP4 GN=K15M2.17 OS=Arabidopsis thaliana (Mouse-ear cress) PE=2 SV=1	hypothetical protein JCGZ_09840 [Jatropha curcas]
	VF11930	1.10139	0.0203656	0.000128989	0.180443	6.339e-16	0.0227139	--	PREDICTED: OPA3-like protein [Nicotiana sylvestris]
	VF11359	2.7261	7.8179e-07	5.18006e-06	6.32515e-12	0.00110637	1.11073	--	hypothetical protein JCGZ_14546 [Jatropha curcas]
	VF11095	2.7396	0.866441	0.196995	0.955029	0.595501	0.656893	LRR receptor-like serine/threonine-protein kinase ERECTA {ECO:0000303|PubMed:8624444} (Precursor) OS=Arabidopsis thaliana (Mouse-ear cress) PE=1 SV=1	hypothetical protein POPTR_0006s06000g [Populus trichocarpa]
	VF10971	146.929	26.8717	26.9359	54.4285	31.367	67.5195	Protein EARLY FLOWERING 4 GN=At2g40080 OS=Arabidopsis thaliana (Mouse-ear cress) PE=1 SV=1	hypothetical protein JCGZ_01274 [Jatropha curcas]
	VF10590	8.407	1.89808	0	1.10144	0.94958	2.92123	CLE46p (Precursor) GN=CLE46 OS=Arabidopsis thaliana (Mouse-ear cress) PE=3 SV=1	unknown [Populus trichocarpa]
	VF10506	101.803	35.1412	22.3565	36.9665	48.3138	49.5791	Protein ELF4-LIKE 4 OS=Arabidopsis thaliana (Mouse-ear cress) PE=2 SV=1	conserved hypothetical protein [Ricinus communis]
	VF10358	33.6094	8.05244	11.7778	13.5616	10.4909	12.6945	--	conserved hypothetical protein [Ricinus communis]
	VF09824	1.67042	0.250182	0.465506	0.240935	0.352068	0.152027	Pentatricopeptide repeat-containing protein At4g20090 GN=EMB1025 OS=Arabidopsis thaliana (Mouse-ear cress) PE=3 SV=1	hypothetical protein JCGZ_11161 [Jatropha curcas]
	VF09647	9.97645	4.09047	4.77992	3.24988	1.82248	3.37624	--	hypothetical protein JCGZ_10168 [Jatropha curcas]
	VF09372	1.23422	0.517916	0.263214	0.449143	0.0867257	0	GDSL esterase/lipase At4g16230 (Precursor) GN=At4g16230 OS=Arabidopsis thaliana (Mouse-ear cress) PE=3 SV=2	hypothetical protein JCGZ_19011 [Jatropha curcas]
	VF08903	183.431	20.2967	20.4509	70.8219	53.7978	24.7085	--	hypothetical protein JCGZ_04018 [Jatropha curcas]
	VF08639	1.79542	0.499903	0.127181	0.703441	0.792502	0.596173	Probable disease resistance protein At5g63020 GN=At5g63020 OS=Arabidopsis thaliana (Mouse-ear cress) PE=2 SV=2	Disease resistance protein RPS5, putative [Ricinus communis]
	VF08265	4.4033	1.12758	1.11344	0.7334	0.925051	1.96492	--	hypothetical protein RCOM_0740700 [Ricinus communis]
	VF08203	4.03815	0.86848	0.841006	0	1.59875	0	Acetyl-CoA acetyltransferase, cytosolic 1 GN=MIF21.12 OS=Arabidopsis thaliana (Mouse-ear cress) PE=2 SV=1	acetyl-CoA acetyltransferase, mitochondrial, putative [Ricinus communis]
	VF07971	27.6036	0.0470811	0.115282	8.54993	0.113439	3.44454e-08	--	hypothetical protein JCGZ_00933 [Jatropha curcas]
	VF07609	453.176	139.48	127.303	180.772	156.668	172.722	--	conserved hypothetical protein [Ricinus communis]
	VF07606	1.08454	0.502189	0.177007	0.390978	0.214597	0.334733	Zinc finger protein 8 GN=ZFP8 OS=Arabidopsis thaliana (Mouse-ear cress) PE=2 SV=1	nucleic acid binding protein, putative [Ricinus communis]
	VF06634	1.84344	0.178843	0.159979	0.452561	0.712654	0.422508	Anthocyanidin 3-O-glucoside 2&apos;&apos;-O-glucosyltransferase GN=3GGT OS=Ipomoea purpurea (Common morning glory) PE=2 SV=1	UDP-glucosyltransferase, putative [Ricinus communis]
	VF06576	21.1058	7.1643	8.67374	9.01351	6.89378	4.94904	Protein Mut11 GN=Mut11 OS=Chlamydomonas reinhardtii (Chlamydomonas smithii) PE=2 SV=1	hypothetical protein JCGZ_08356 [Jatropha curcas]
	VF06326	3.82491	0.486228	0.807277	1.1826	0.645822	0.678945	--	hypothetical protein JCGZ_07963 [Jatropha curcas]
	VF05502	21.9697	10.0352	8.97663	9.25384	6.83486	7.5084	DnaJ protein ERDJ3B (Precursor) GN=F26K9.30 OS=Arabidopsis thaliana (Mouse-ear cress) PE=1 SV=1	hypothetical protein CISIN_1g032533mg [Citrus sinensis]
	VF04914	2.2655	0	0	1.09699	0.50797	0.725875	--	conserved hypothetical protein [Ricinus communis]
	VF04760	3.53557	0.61332	0.257291	0.174617	0.294264	0.53689	Protein NEN4 {ECO:0000303|PubMed:25081480} OS=Arabidopsis thaliana (Mouse-ear cress) PE=2 SV=1	hypothetical protein POPTR_0005s08090g [Populus trichocarpa]
	VF04097	1.41318	0.245508	0.258756	0.686451	0.0785635	0.61188	F-box/kelch-repeat protein At1g22040 GN=At1g22040 OS=Arabidopsis thaliana (Mouse-ear cress) PE=2 SV=1	hypothetical protein JCGZ_05355 [Jatropha curcas]
	VF03737	81.9437	18.6495	13.4418	7.8221	8.96087	1.65489	Ribosome-inactivating protein gelonin (Precursor) GN=GEL OS=Suregada multiflora (False lime) PE=1 SV=2	type 1 ribosomal inactivating protein [Jatropha curcas]
	VF03472	1.62984	7.53313e-17	3.58367e-07	1.58508e-14	0.361424	0.00555885	--	zinc finger protein, putative [Ricinus communis]
	VF03397	1.86872	0.766405	0.475885	0.621768	0.469345	0.523074	2&apos;-deoxymugineic-acid 2&apos;-dioxygenase GN=IDS3 OS=Hordeum vulgare (Barley) PE=1 SV=3	hypothetical protein JCGZ_24938 [Jatropha curcas]
	VF02883	1.78755	0.752614	0.0931175	0.826734	0.446227	0.0502513	Putative Myb family transcription factor At1g14600 GN=At1g14600 OS=Arabidopsis thaliana (Mouse-ear cress) PE=2 SV=2	hypothetical protein JCGZ_21574 [Jatropha curcas]
	VF02750	117.228	34.6255	51.3879	41.0224	44.9853	58.334	--	Uncharacterized protein TCM_029436 [Theobroma cacao]
	VF02713	1.07997	0.364681	0	0	0	0	--	conserved hypothetical protein [Ricinus communis]
	VF02239	13.4956	1.01475	2.80352	0.627192	0.0661785	0.815088	--	hypothetical protein JCGZ_20850 [Jatropha curcas]
	VF01462	1.01101	0	0	0.277444	0.166307	0.232021	--	hypothetical protein JCGZ_22016 [Jatropha curcas]
	VF01231	18.4063	0.0180392	0.119762	6.83321	0.303516	0.811513	Probable LRR receptor-like serine/threonine-protein kinase At3g47570 (Precursor) GN=At3g47570 OS=Arabidopsis thaliana (Mouse-ear cress) PE=2 SV=1	hypothetical protein JCGZ_11090 [Jatropha curcas]
	VF01105	1.3552	0.622939	0.448044	0.348346	0.382222	0.651957	--	PREDICTED: uncharacterized protein LOC105133607 isoform X2 [Populus euphratica]
	VF00641	5.9696	0.513809	1.46133	2.79479	2.36211e-06	1.31172	--	hypothetical protein JCGZ_19258 [Jatropha curcas]
	VF00562	11.0012	0.00515157	1.45419	2.37825	2.08959	4.65353	--	PREDICTED: uncharacterized protein LOC104213390 [Nicotiana sylvestris]
	VF00373	1.09467	0.374798	0	0.506045	0.407532	0.180839	--	conserved hypothetical protein [Ricinus communis]
	VF00159	3.37006	0	0	0	0	0	--	conserved hypothetical protein [Ricinus communis]
	VF00050	4.26197	1.68754	1.57337	2.09218	1.6421	1.31964	Putative disease resistance protein RGA4 GN=RGA4 OS=Solanum bulbocastanum (Wild potato) PE=2 SV=1	hypothetical protein JCGZ_02621 [Jatropha curcas]
	VFNG5747	97.7532	24.6332	24.865	46.3901	29.2532	25.7609	Zinc finger BED domain-containing protein RICESLEEPER 2 OS=Oryza sativa subsp. japonica (Rice) PE=2 SV=1	PREDICTED: zinc finger BED domain-containing protein RICESLEEPER 1-like, partial [Nicotiana sylvestris]
	VFNG5600	9.30544	0.966006	0.769187	4.40546	1.23256	0.764411	Putative pentatricopeptide repeat-containing protein At3g23330 GN=PCMP-H32 OS=Arabidopsis thaliana (Mouse-ear cress) PE=3 SV=1	PREDICTED: putative pentatricopeptide repeat-containing protein At3g23330 [Vitis vinifera]
	VFNG4790	1.49813	0.619713	0.141382	0.0443711	0	0	UDP-glycosyltransferase 83A1 GN=UGT83A1 OS=Arabidopsis thaliana (Mouse-ear cress) PE=2 SV=1	hypothetical protein POPTR_0017s12710g [Populus trichocarpa]
	VFNG4527	3.29413	0.539981	0.211526	1.26062	0.5026	0.344339	Ethylene-overproduction protein 1 GN=ETO1 OS=Arabidopsis thaliana (Mouse-ear cress) PE=1 SV=2	PREDICTED: ethylene-overproduction protein 1-like [Populus euphratica]
	VFNG4522	7.67777	3.03382	2.07223	2.40278	1.12834	0.148816	Cytochrome P450 734A1 GN=F18A8.8 OS=Arabidopsis thaliana (Mouse-ear cress) PE=2 SV=1	hypothetical protein JCGZ_13283 [Jatropha curcas]
	VFNG4488	1.69622	0.675839	0.579233	0.815116	0.708188	0.791219	RNA-directed DNA polymerase homolog OS=Oenothera berteroana (Bertero&apos;s evening primrose) PE=4 SV=1	DNA/RNA polymerases superfamily protein [Theobroma cacao]
	VFNG4418	2.19387	0.919541	0.913983	1.03235	0.743799	0.645424	Putative disease resistance RPP13-like protein 1 GN=RPPL1 OS=Arabidopsis thaliana (Mouse-ear cress) PE=3 SV=1	hypothetical protein POPTR_0004s20690g [Populus trichocarpa]
	VFNG3810	1.29633	0.353464	0.266817	0.427872	0.497518	0.113434	--	hypothetical protein JCGZ_19984 [Jatropha curcas]
	VFNG3544	1.84598	0.589766	0.151276	0.837732	0.286853	0.235471	--	hypothetical protein JCGZ_12069 [Jatropha curcas]
	VFNG3298	2.92749	1.19816	0.699036	1.3318	1.39672	1.24198	--	conserved hypothetical protein [Ricinus communis]
	VFNG3239	6.85117	0.884521	1.21961	2.57852	2.42938e-10	1.53488	--	conserved hypothetical protein [Ricinus communis]
	VFNG3114	1.22281	2.76892e-06	0.0285006	0.293199	0.271644	0.0145478	Probable F-box protein At4g22060 GN=At4g22060 OS=Arabidopsis thaliana (Mouse-ear cress) PE=4 SV=2	PREDICTED: F-box protein At2g17036-like [Fragaria vesca subsp. vesca]
	VFNG30	1.03685	5.90948e-06	0.0600902	0.0112287	0.0959623	0.000110836	Putative disease resistance protein RGA4 GN=RGA4 OS=Solanum bulbocastanum (Wild potato) PE=2 SV=1	hypothetical protein JCGZ_13002 [Jatropha curcas]
	VFNG2929	1.88376	0.297866	0.0386187	0.806325	0.119132	0.244833	ABC transporter G family member 39 OS=Arabidopsis thaliana (Mouse-ear cress) PE=3 SV=1	hypothetical protein JCGZ_23649 [Jatropha curcas]
	VFNG28	1.09341	0.391298	0.29436	0.487547	0.355509	0.144281	Endonuclease OS=Nicotiana tabacum (Common tobacco) PE=2 SV=1	PREDICTED: uncharacterized protein LOC104607033 [Nelumbo nucifera]
	VFNG2528	6.6821	7.54679e-07	0.903357	3.1003	1.70684	0.582325	--	conserved hypothetical protein [Ricinus communis]
	VFNG2474	1.98532	0.241407	0.275623	0.512746	0.125244	0.109492	--	Gag-pol polyprotein, putative [Solanum demissum]
	VFNG2405	5.21142	1.0493	0.58994	0.599202	1.60255	1.37949	Uncharacterized protein At2g29880 GN=At2g29880 OS=Arabidopsis thaliana (Mouse-ear cress) PE=2 SV=1	PREDICTED: uncharacterized protein LOC102665485 [Glycine max]
	VFNG2274	2.94546	0.278833	2.46455e-08	1.13748	0.208499	0.0185445	--	PREDICTED: uncharacterized protein LOC104597016 [Nelumbo nucifera]
	VFNG2083	6.78768	0.0481625	0.0389184	2.37886	0.787369	1.10008	Apocytochrome f {ECO:0000255|HAMAP-Rule:MF_00610} (Precursor) OS=Phalaenopsis aphrodite subsp. formosana (Moth orchid) PE=3 SV=1	cytochrome f (chloroplast) [Trifolium glanduliferum]
	VFNG1763	82.9539	27.6048	38.675	16.263	11.2453	11.9218	Histone H4 OS=Glycine max (Soybean) PE=3 SV=1	Histone H4 [Aegilops tauschii]
	VFNG1629	1.31001	0.194834	0.0830218	0.346914	0.110377	0.140371	NEDD8-like protein RUB2 (Precursor) GN=T20F21.24 OS=Arabidopsis thaliana (Mouse-ear cress) PE=1 SV=3	polyubiquitin (ubq10) [Arabidopsis thaliana]
	VFNG1284	1.28622	9.80803e-05	0.0324719	0.170935	0.0986422	0.588541	Sigma factor binding protein 1, chloroplastic (Precursor) GN=SIB1 OS=Arabidopsis thaliana (Mouse-ear cress) PE=1 SV=1	hypothetical protein JCGZ_24548 [Jatropha curcas]
C2-specific	VF06135	0.446215	5.34507	1.45677	0.775347	1.97745	0.905837	Probable WRKY transcription factor 46 GN=WRKY46 OS=Arabidopsis thaliana (Mouse-ear cress) PE=2 SV=1	hypothetical protein POPTR_0014s09190g [Populus trichocarpa]
	VF06016	9.18337	20.2411	1.29424	8.15975	7.62859	0.81588	Transcription factor bHLH96 GN=T9N14.4 OS=Arabidopsis thaliana (Mouse-ear cress) PE=2 SV=1	hypothetical protein JCGZ_18668 [Jatropha curcas]
	VF11395	0.00026538	6.41881	1.67177	1.99395	2.34044	1.90768	Transcription factor bHLH3 OS=Arabidopsis thaliana (Mouse-ear cress) PE=2 SV=1	DNA binding protein, putative [Ricinus communis]
	VF26516	2.88017	7.91411	1.96497	0.452908	1.71951	3.54581	Transcription factor MYB108 GN=F5E6.18 OS=Arabidopsis thaliana (Mouse-ear cress) PE=1 SV=1	hypothetical protein JCGZ_18353 [Jatropha curcas]
	VF10858	0.789137	4.37514	1.1074	0.178252	0.552471	0.398059	Vacuolar cation/proton exchanger 3 GN=CAX3 OS=Arabidopsis thaliana (Mouse-ear cress) PE=1 SV=1	Vacuolar cation/proton exchanger 1a, putative [Ricinus communis]
	VFNG2158	0.0306323	4.40433	0.407196	0.305928	1.20376	0.250061	Arabinogalactan peptide 16 (Precursor) GN=AGP16 OS=Arabidopsis thaliana (Mouse-ear cress) PE=1 SV=1	hypothetical protein JCGZ_07227 [Jatropha curcas]
	VF21688	1.9659	18.6242	2.24827	4.09632	4.8069	3.81126	Calcium-binding protein CML38 GN=CML38 OS=Arabidopsis thaliana (Mouse-ear cress) PE=2 SV=1	hypothetical protein JCGZ_08004 [Jatropha curcas]
	VF05579	2.58896	9.6901	3.22306	2.5136	3.59379	1.33923	HVA22-like protein a GN=HVA22A OS=Arabidopsis thaliana (Mouse-ear cress) PE=2 SV=1	conserved hypothetical protein [Ricinus communis]
	VF09562	0.179683	2.751	0.0467012	0.28251	0.502976	1.77596e-06	E3 ubiquitin-protein ligase PUB23 GN=PUB23 OS=Arabidopsis thaliana (Mouse-ear cress) PE=1 SV=1	Spotted leaf protein, putative [Ricinus communis]
	VF15696	0	7.68965	0.276707	0.493236	0.94533	0.343944	Ethylene-responsive transcription factor ERF017 GN=ERF017 OS=Arabidopsis thaliana (Mouse-ear cress) PE=2 SV=1	hypothetical protein JCGZ_07518 [Jatropha curcas]
	VF10642	0.594915	3.04079	0	0	0.5882	0.120434	Basic form of pathogenesis-related protein 1 (Precursor) OS=Nicotiana tabacum (Common tobacco) PE=3 SV=1	hypothetical protein JCGZ_06943 [Jatropha curcas]
	VF13177	2.17204	12.88	2.58282	0.858975	2.07115	3.72022	Cytokinin dehydrogenase 1 (Precursor) GN=CKX1 OS=Arabidopsis thaliana (Mouse-ear cress) PE=1 SV=1	gulonolactone oxidase, putative [Ricinus communis]
	VF14044	0	5.43906	0	0.338008	0	0.473552	Auxin-induced protein X15 OS=Glycine max (Soybean) PE=2 SV=1	hypothetical protein PHAVU_007G219600g [Phaseolus vulgaris]
	VF00052	2.53355	8.57573	2.78709	1.58073	2.31168	2.0851	Protein PHLOEM PROTEIN 2-LIKE A1 GN=PP2A1 OS=Arabidopsis thaliana (Mouse-ear cress) PE=2 SV=1	hypothetical protein JCGZ_02619 [Jatropha curcas]
	VF00121	3.4843	8.16096	1.77774	3.8424	3.96462	4.03615	Caffeoylshikimate esterase GN=CSE OS=Arabidopsis thaliana (Mouse-ear cress) PE=1 SV=1	hypothetical protein POPTR_0001s47090g [Populus trichocarpa]
	VF00496	0.868332	4.60187	1.74728	0.569365	1.66695	1.53973	Probable N-acetyltransferase HLS1-like GN=At2g23060 OS=Arabidopsis thaliana (Mouse-ear cress) PE=2 SV=1	hypothetical protein JCGZ_12522 [Jatropha curcas]
	VF00620	0	1.72492	0	0	0.0624136	0.0852875	Polygalacturonase (Precursor) OS=Prunus persica (Peach) PE=2 SV=1	hypothetical protein JCGZ_19282 [Jatropha curcas]
	VF01593	0.326291	2.1975	0.0855789	0.388683	0.343007	1.06073	Rhodanese-like domain-containing protein 15, chloroplastic (Precursor) OS=Arabidopsis thaliana (Mouse-ear cress) PE=2 SV=1	hypothetical protein JCGZ_22340 [Jatropha curcas]
	VF01678	1.458	3.47851	0.943089	1.66779	1.37621	1.32922	NAC domain-containing protein 90 GN=NAC090 OS=Arabidopsis thaliana (Mouse-ear cress) PE=2 SV=1	NAC transcription factor 037 [Jatropha curcas]
	VF01797	0.712947	2.02072	0.428634	0.847758	0.612566	0.835501	--	hypothetical protein JCGZ_25869 [Jatropha curcas]
	VF02050	0.482344	1.62907	0.387153	0.128502	0.273665	0.523994	Transcriptional regulator STERILE APETALA GN=SAP OS=Arabidopsis thaliana (Mouse-ear cress) PE=1 SV=1	hypothetical protein JCGZ_18491 [Jatropha curcas]
	VF02395	3.18512	15.4394	6.1149	2.24687	4.13714	2.84148	Endochitinase (Precursor) OS=Pisum sativum (Garden pea) PE=2 SV=1	hypothetical protein JCGZ_22364 [Jatropha curcas]
	VF02578	0.763945	1.92692	0.6038	0.654258	0.780439	0.413364	Ubiquitin carboxyl-terminal hydrolase 12 GN=UBP12 OS=Arabidopsis thaliana (Mouse-ear cress) PE=1 SV=2	conserved hypothetical protein [Ricinus communis]
	VF02855	1.22994	11.0018	1.53012	0	2.88772	0.564765	--	hypothetical protein POPTR_0004s05970g [Populus trichocarpa]
	VF02956	2.57321	5.59166	2.52203	2.19325	1.40484	2.29991	BTB/POZ domain-containing protein At3g19850 GN=At3g19850 OS=Arabidopsis thaliana (Mouse-ear cress) PE=2 SV=1	hypothetical protein JCGZ_01662 [Jatropha curcas]
	VF03718	3.92466e-08	3.72216	0.755377	0.962551	0	0.0799155	Protein NEN3 {ECO:0000303|PubMed:25081480} OS=Arabidopsis thaliana (Mouse-ear cress) PE=2 SV=1	hypothetical protein JCGZ_11658 [Jatropha curcas]
	VF03993	0.816755	3.30128	0.317154	0.85117	0.691602	1.36731	Mitogen-activated protein kinase kinase kinase YODA GN=YDA OS=Arabidopsis thaliana (Mouse-ear cress) PE=1 SV=1	Mitogen-activated protein kinase kinase kinase, putative [Ricinus communis]
	VF04100	1.00647	14.1008	0.388129	0.494343	1.19975	2.00838	Osmotin-like protein OSM34 (Precursor) GN=OSM34 OS=Arabidopsis thaliana (Mouse-ear cress) PE=2 SV=2	osmotin-like protein [Hevea brasiliensis]
	VF04202	0.417013	3.25454	0.753858	0.126821	0.158844	0.384188	--	hypothetical protein JCGZ_02319 [Jatropha curcas]
	VF04871	0	1.70982	0.775445	0	0	0.58992	Dynein 8 kDa light chain, flagellar outer arm OS=Chlamydomonas reinhardtii (Chlamydomonas smithii) PE=1 SV=1	hypothetical protein JCGZ_18899 [Jatropha curcas]
	VF05078	1.5698	3.80477	0.691556	0.00665188	9.70073e-06	1.8174	--	hypothetical protein JCGZ_11425 [Jatropha curcas]
	VF05280	0.237549	2.52478	0.256745	0.370615	0.279407	0.234675	E3 ubiquitin-protein ligase RING1-like GN=At3g19950 OS=Arabidopsis thaliana (Mouse-ear cress) PE=1 SV=1	protein binding protein, putative [Ricinus communis]
	VF05408	0	7.36926	1.24064	1.15491	3.22728	1.59486	--	hypothetical protein JCGZ_01434 [Jatropha curcas]
	VF05472	0	1.73383	0.0584665	0.054832	0.366545	0.172975	Bark storage protein B (Precursor) GN=BSP OS=Populus deltoides (Eastern poplar) PE=1 SV=1	hypothetical protein JCGZ_08884 [Jatropha curcas]
	VF05839	1.95987	23.9192	5.50997	2.28524	8.49535	8.65193	--	hypothetical protein JCGZ_23841 [Jatropha curcas]
	VF06578	0.185004	1.05336	0.145402	0.483638	0.341754	0.172626	Ethylene-responsive transcription factor ERF112 GN=ERF112 OS=Arabidopsis thaliana (Mouse-ear cress) PE=2 SV=1	AP2 domain-containing transcription factor family protein [Populus trichocarpa]
	VF06606	0	1.35037	0.457439	0.162208	0.17873	0	--	hypothetical protein JCGZ_15081 [Jatropha curcas]
	VF07156	0.26335	1.00977	3.13955e-05	0.23263	8.53777e-06	0.0028226	Uncharacterized protein At4g38062 GN=At4g38062 OS=Arabidopsis thaliana (Mouse-ear cress) PE=4 SV=1	PREDICTED: uncharacterized protein At4g38062-like [Pyrus x bretschneideri]
	VF07314	0.718706	1.93085	0.937308	0.681015	0.950609	0.464137	Protein NRT1/ PTR FAMILY 3.1 GN=F24J5.19 OS=Arabidopsis thaliana (Mouse-ear cress) PE=2 SV=1	hypothetical protein JCGZ_25283 [Jatropha curcas]
	VF08001	0	1.34572	0	0	0	0	--	--
	VF08698	0.306459	4.67532	1.77957	0.522357	1.61378	0.290822	Germin-like protein subfamily 1 member 13 (Precursor) GN=GLP6 OS=Arabidopsis thaliana (Mouse-ear cress) PE=2 SV=2	hypothetical protein JCGZ_10283 [Jatropha curcas]
	VF08755	0.548708	4.10921	0.407071	1.13303	0.398933	0.314801	--	conserved hypothetical protein [Ricinus communis]
	VF08768	3.20638e-08	5.76075	2.84689e-05	7.47081e-06	2.05584	2.09208e-05	Cationic amino acid transporter 6, chloroplastic (Precursor) GN=CAT6 OS=Arabidopsis thaliana (Mouse-ear cress) PE=2 SV=1	hypothetical protein JCGZ_24133 [Jatropha curcas]
	VF08985	0.65671	7.35909	2.15078	1.48784	2.84343	1.22758	Calcium-binding protein PBP1 GN=F24B18.11 OS=Arabidopsis thaliana (Mouse-ear cress) PE=1 SV=1	ccd1, putative [Ricinus communis]
	VF09215	2.16118	5.94328	2.58035	0.204996	0.462151	0.654122	Copper transport protein CCH GN=CCH OS=Arabidopsis thaliana (Mouse-ear cress) PE=1 SV=1	chloroplast-targeted copper chaperone, putative [Ricinus communis]
	VF09260	0.37565	15.5911	6.50002	2.89934	3.03169	3.15681	RING-H2 finger protein ATL2 GN=ATL2 OS=Arabidopsis thaliana (Mouse-ear cress) PE=2 SV=2	hypothetical protein JCGZ_18911 [Jatropha curcas]
	VF09282	0.13356	3.06476	0.828771	0.839671	0.967097	0	Major allergen Pru ar 1 OS=Prunus armeniaca (Apricot) PE=1 SV=1	Major allergen Pru ar, putative [Ricinus communis]
	VF09401	2.62204e-202	11.4666	1.12757	4.23897	0.96017	1.85138e-38	--	unnamed protein product [Vitis vinifera]
	VF09445	7.21673	23.0823	6.38641	7.41771	7.78647	8.69837	--	conserved hypothetical protein [Ricinus communis]
	VF09628	0.536622	3.06076	1.3846	1.01113	0.5934	0.884925	Probable xyloglucan endotransglucosylase/hydrolase protein 23 (Precursor) GN=F14M19.90 OS=Arabidopsis thaliana (Mouse-ear cress) PE=2 SV=1	hypothetical protein JCGZ_08704 [Jatropha curcas]
	VF09979	0	27.5311	0	0	9.5321e-75	1.22852e-36	--	hypothetical protein JCGZ_23072 [Jatropha curcas]
	VF10089	2.83499	15.8542	0.689777	2.66754	0.887909	2.38596	Glucan endo-1,3-beta-glucosidase major form (Precursor) GN=HGN1 OS=Hevea brasiliensis (Para rubber tree) PE=1 SV=2	beta-1,3-glucanase [Hevea brasiliensis]
	VF10118	0.290059	1.86152	0.571021	0.0279067	0.477819	0.294357	WAT1-related protein At4g30420 GN=At4g30420 OS=Arabidopsis thaliana (Mouse-ear cress) PE=3 SV=1	hypothetical protein POPTR_0018s10840g [Populus trichocarpa]
	VF10269	0.0498795	11.6948	2.17555	0.981301	4.29736	1.04341	Protein STAY-GREEN 2, chloroplastic (Precursor) GN=T26M18.120 OS=Arabidopsis thaliana (Mouse-ear cress) PE=2 SV=1	putative G-protein coupled receptor Mth-like 2 [Gossypium arboreum]
	VF10290	0	1.66964	0	0	0.387704	0	Dehydration-responsive element-binding protein 1A GN=At4g25480 OS=Arabidopsis thaliana (Mouse-ear cress) PE=1 SV=2	hypothetical protein JCGZ_20671 [Jatropha curcas]
	VF10308	0.46602	1.49952	0.469565	0.41269	0.354265	0.577774	Serine/threonine-protein kinase EDR1 GN=F22O13.20 OS=Arabidopsis thaliana (Mouse-ear cress) PE=1 SV=1	map3k delta-1 protein kinase, putative [Ricinus communis]
	VF10698	0.45863	1.34576	0.660454	0	0	0	--	conserved hypothetical protein [Ricinus communis]
	VF10766	0.325445	1.16882	0.248703	0.307652	0.332399	0.20274	9-cis-epoxycarotenoid dioxygenase NCED3, chloroplastic (Precursor) GN=MOA2.4 OS=Arabidopsis thaliana (Mouse-ear cress) PE=2 SV=1	hypothetical protein JCGZ_19722 [Jatropha curcas]
	VF10882	1.39869	3.67915	0.856146	1.17294	1.54439	1.14696	--	conserved hypothetical protein [Ricinus communis]
	VF11107	0.34671	2.81681	0.749098	0.436121	1.09506	0.805729	Alpha-amylase/subtilisin inhibitor (Precursor) OS=Hordeum vulgare (Barley) PE=1 SV=2	hypothetical protein JCGZ_21012 [Jatropha curcas]
	VF11402	9.7963e-16	4.33531	1.85399	0	0	0	--	hypothetical protein JCGZ_21805 [Jatropha curcas]
	VF11596	1.5981e-79	8.71166	2.69199e-11	0.499336	0.000542865	5.2648e-08	--	hypothetical protein JCGZ_14189 [Jatropha curcas]
	VF11629	4.47116	33.3212	4.57353	0	7.151	7.31763	--	hypothetical protein RCOM_1341590 [Ricinus communis]
	VF11847	2.80485	5.88959	1.13983	2.62102	2.1335	1.26967	WRKY transcription factor 18 GN=WRKY18 OS=Arabidopsis thaliana (Mouse-ear cress) PE=1 SV=2	WRKY transcription factor 28 [Jatropha curcas]
	VF12261	0.214436	5.41872	0.305302	0.428608	1.88793	0.562615	Nodulation-signaling pathway 2 protein GN=NSP2 OS=Medicago truncatula (Barrel medic) PE=1 SV=1	transcription factor, putative [Ricinus communis]
	VF12361	3.85127	18.3402	7.50153	6.63492	6.91629	3.05554	--	PREDICTED: formimidoyltransferase-cyclodeaminase-like [Malus domestica]
	VF12409	6.85323	15.3747	2.3044	5.03107	2.47119	6.96045	Isoeugenol synthase 1 GN=IGS1 OS=Petunia hybrida (Petunia) PE=1 SV=1	hypothetical protein JCGZ_23805 [Jatropha curcas]
	VF12743	0	1.53907	0	0	0	0	--	conserved hypothetical protein [Ricinus communis]
	VF12769	0.0202212	1.65761	0.165666	0	0.0283299	0.608422	Phospholipase A1-II 1 OS=Oryza sativa subsp. japonica (Rice) PE=3 SV=2	lipase [Ricinus communis]
	VF12864	1.11984	2.99999	0.0873555	3.8083e-13	0.0085911	1.60015e-15	Eukaryotic peptide chain release factor subunit 1-3 GN=ERF1-3 OS=Arabidopsis thaliana (Mouse-ear cress) PE=1 SV=1	hypothetical protein JCGZ_23058 [Jatropha curcas]
	VF13194	1.00671	2.56349	0.226201	0.149923	0.073065	0.280753	Alpha-amylase/subtilisin inhibitor (Precursor) GN=OSJNBa0038O10.14 OS=Oryza sativa subsp. japonica (Rice) PE=1 SV=2	hypothetical protein JCGZ_21018 [Jatropha curcas]
	VF13557	1.8846	10.4588	1.4834	2.04589	1.93166	1.08992	--	hypothetical protein JCGZ_20354 [Jatropha curcas]
	VF13588	10.5536	61.5693	1.79277	3.33835	2.21231	7.0343	--	conserved hypothetical protein [Ricinus communis]
	VF13604	0	3.37337	0.695215	0.112643	1.00455	0	Protein EXORDIUM (Precursor) GN=EXO OS=Arabidopsis thaliana (Mouse-ear cress) PE=2 SV=1	hypothetical protein JCGZ_15807 [Jatropha curcas]
	VF13631	0.62186	11.036	1.86268	0.644605	3.90998	1.97276	Mitochondrial uncoupling protein 5 GN=F14M13.10 OS=Arabidopsis thaliana (Mouse-ear cress) PE=2 SV=1	hypothetical protein JCGZ_24951 [Jatropha curcas]
	VF13788	0.816308	13.2731	5.34574	1.3917	4.28463	2.26178	Probable trehalose-phosphate phosphatase E GN=TPPE OS=Arabidopsis thaliana (Mouse-ear cress) PE=2 SV=1	trehalose-6-phosphate phosphatase family protein [Populus trichocarpa]
	VF14043	0	1.67821	0	0	0.71375	0	Auxin-induced protein 6B OS=Glycine max (Soybean) PE=2 SV=1	PREDICTED: uncharacterized protein LOC104595420 [Nelumbo nucifera]
	VF14319	0.978999	2.32832	0.628459	0.832359	1.14247	0.916427	Protein NRT1/ PTR FAMILY 5.4 GN=NPF5.4 OS=Arabidopsis thaliana (Mouse-ear cress) PE=2 SV=1	hypothetical protein JCGZ_24527 [Jatropha curcas]
	VF14361	0.225498	1.1512	0.0664654	0.307777	0.189477	0.256184	Probable carboxylesterase 12 GN=CXE12 OS=Arabidopsis thaliana (Mouse-ear cress) PE=1 SV=1	Gibberellin receptor GID1, putative [Ricinus communis]
	VF14571	7.8478	18.0941	5.13798	8.37303	4.44522	4.67562	Linoleate 13S-lipoxygenase 2-1, chloroplastic (Precursor) GN=LOX2.1 OS=Solanum tuberosum (Potato) PE=1 SV=1	hypothetical protein JCGZ_16708 [Jatropha curcas]
	VF14710	3.68796	12.3659	4.90792	3.74867	0	2.77701	--	conserved hypothetical protein [Ricinus communis]
	VF14721	4.53534	63.3077	12.1945	12.7202	23.5729	17.3281	--	AP2/ERF super family protein [Hevea brasiliensis]
	VF14826	9.6364	25.4564	9.38999	11.4404	11.2368	5.11806	--	hypothetical protein JCGZ_25840 [Jatropha curcas]
	VF15311	0.703365	4.06789	1.65466	0.294808	0.300405	0.810423	--	hypothetical protein POPTR_0005s11660g [Populus trichocarpa]
	VF15633	16.9007	48.7783	21.7521	17.4261	24.0799	12.9097	Deacetylvindoline O-acetyltransferase GN=DAT OS=Catharanthus roseus (Madagascar periwinkle) PE=1 SV=1	Salutaridinol 7-O-acetyltransferase, putative [Ricinus communis]
	VF15697	3.44127	9.34577	3.13049	2.12428	2.28457	2.76328	--	ethylene-responsive element binding protein 2 [Hevea brasiliensis]
	VF15884	0.297559	1.0439	0.014563	0.263057	0.337286	0.226152	F-box protein PP2-B15 GN=PP2B15 OS=Arabidopsis thaliana (Mouse-ear cress) PE=2 SV=2	SKP1 interacting partner 3-related family protein [Populus trichocarpa]
	VF16480	0.404575	9.39914	1.12756	0.421912	1.65549	1.13703	Protein EXORDIUM (Precursor) GN=EXO OS=Arabidopsis thaliana (Mouse-ear cress) PE=2 SV=1	hypothetical protein POPTR_0005s17200g [Populus trichocarpa]
	VF17072	0	2.37821	0.00836095	0	1.18181	0	--	conserved hypothetical protein [Ricinus communis]
	VF17332	1.68786	6.459	0.465918	2.2057	0.609162	2.28127	--	PREDICTED: uncharacterized protein LOC103708265 [Phoenix dactylifera]
	VF17580	2.21211	16.8804	1.75209	0.990012	3.34774	2.72037	--	hypothetical protein JCGZ_13999 [Jatropha curcas]
	VF17625	1.31272	4.93434	2.43569	1.20481	2.22394	1.9269	--	hypothetical protein JCGZ_13957 [Jatropha curcas]
	VF17898	0	1.54275	0.452089	0	0.459415	0	Probable calcium-binding protein CML27 OS=Arabidopsis thaliana (Mouse-ear cress) PE=1 SV=1	hypothetical protein JCGZ_04272 [Jatropha curcas]
	VF18022	13.0718	50.0648	3.80353	15.7071	16.6904	12.2324	Zinc finger protein ZAT10 GN=T22C5.18 OS=Arabidopsis thaliana (Mouse-ear cress) PE=2 SV=1	hypothetical protein JCGZ_16041 [Jatropha curcas]
	VF18214	3.87133	24.1784	4.15565	4.46753	9.48066	8.47172	Protein YLS9 GN=F11F19.11 OS=Arabidopsis thaliana (Mouse-ear cress) PE=2 SV=1	hypothetical protein JCGZ_08772 [Jatropha curcas]
	VF18237	26.9398	198.792	83.9232	15.292	38.7294	2.98382	2-methylbutanal oxime monooxygenase GN=CYP71E7 OS=Manihot esculenta (Cassava) PE=1 SV=1	RecName: Full=2-methylbutanal oxime monooxygenase; AltName: Full=Cytochrome P450 71E7 [Manihot esculenta]
	VF18306	2.74302	22.0072	5.96033	2.09047	4.46237	3.43031	--	hypothetical protein JCGZ_21740 [Jatropha curcas]
	VF18517	0	2.98576	0.958755	0.969575	0	0	--	hypothetical protein POPTR_0001s05910g [Populus trichocarpa]
	VF18535	0	5.64515	0.497437	0.907416	0.877957	0	Zinc finger protein ZAT12 GN=MMN10.11 OS=Arabidopsis thaliana (Mouse-ear cress) PE=2 SV=1	hypothetical protein JCGZ_05663 [Jatropha curcas]
	VF18724	3.05314	7.03114	0.471774	3.00146	2.24542	1.91612	Mitogen-activated protein kinase kinase kinase YODA GN=YDA OS=Arabidopsis thaliana (Mouse-ear cress) PE=1 SV=1	hypothetical protein JCGZ_12404 [Jatropha curcas]
	VF19137	3.41552	8.56666	0.126145	2.22037	1.18885	1.71516	11S globulin seed storage protein 2 basic chain (Precursor) OS=Sesamum indicum (Oriental sesame) PE=2 SV=1	JHL25P11.12 [Jatropha curcas]
	VF19251	0	1.4337	0.129212	0	0.078575	0.216847	Putative invertase inhibitor (Precursor) OS=Platanus acerifolia (London plane tree) PE=1 SV=1	hypothetical protein JCGZ_11861 [Jatropha curcas]
	VF19535	17.5385	65.3178	10.1154	15.7056	32.5456	16.1974	Chlorophyllase-1 GN=F6F9.28 OS=Arabidopsis thaliana (Mouse-ear cress) PE=1 SV=1	hypothetical protein JCGZ_21880 [Jatropha curcas]
	VF19565	20.3608	113.797	56.3103	25.985	30.4744	9.30967	DJ-1 protein homolog E GN=T7F6.3 OS=Arabidopsis thaliana (Mouse-ear cress) PE=1 SV=1	hypothetical protein JCGZ_21851 [Jatropha curcas]
	VF19707	13.0622	137.929	62.3526	13.8935	37.363	7.96727	Cytochrome b5 GN=CYB5 OS=Brassica oleracea var. botrytis (Cauliflower) PE=1 SV=1	hypothetical protein JCGZ_14210 [Jatropha curcas]
	VF19770	0.093656	1.64252	0.394919	0.179769	0.493489	0.283774	Probable 2-oxoglutarate-dependent dioxygenase AOP1.2 GN=AOP1.2 OS=Arabidopsis thaliana (Mouse-ear cress) PE=2 SV=1	hypothetical protein JCGZ_06224 [Jatropha curcas]
	VF20025	0.143997	1.41139	0.218183	0.208803	0	0.539924	17.3 kDa class I heat shock protein GN=HSP17.3-B OS=Glycine max (Soybean) PE=3 SV=1	heat-shock protein, putative [Ricinus communis]
	VF20110	0.088779	3.73247	0.755463	0	0.830164	0.082346	Protein LIGHT-DEPENDENT SHORT HYPOCOTYLS 10 GN=F14N22 OS=Arabidopsis thaliana (Mouse-ear cress) PE=1 SV=1	PREDICTED: uncharacterized protein LOC102606613 [Citrus sinensis]
	VF20130	2.12086	17.9108	7.42091	1.37159	4.99363	5.96178	--	hydrolase, hydrolyzing O-glycosyl compounds, putative [Ricinus communis]
	VF20277	1.40022	3.01039	0.593949	1.08686	0.885387	0.76514	U-box domain-containing protein 21 GN=PUB21 OS=Arabidopsis thaliana (Mouse-ear cress) PE=2 SV=1	hypothetical protein JCGZ_04802 [Jatropha curcas]
	VF20543	0.373624	2.80131	0.387924	0.534099	0.604761	0.497924	Lignin-forming anionic peroxidase (Precursor) OS=Nicotiana sylvestris (Wood tobacco) PE=2 SV=1	Lignin-forming anionic peroxidase precursor, putative [Ricinus communis]
	VF20742	1.05775	2.17584	0.30779	1.0619	1.00054	0.279299	Probable WRKY transcription factor 40 GN=WRKY40 OS=Arabidopsis thaliana (Mouse-ear cress) PE=1 SV=1	WRKY transcription factor 27 [Jatropha curcas]
	VF20918	0.075747	1.36055	0.597748	0.156887	0.464768	0.248279	Xyloglucan endotransglucosylase/hydrolase 2 {ECO:0000250|UniProtKB:Q38857} (Precursor) OS=Glycine max (Soybean) PE=2 SV=1	hypothetical protein JCGZ_13603 [Jatropha curcas]
	VF20921	0.427201	1.65126	0.42924	0.036383	0.186076	0.307217	Xyloglucan endotransglucosylase/hydrolase 2 {ECO:0000250|UniProtKB:Q38857} (Precursor) OS=Glycine max (Soybean) PE=2 SV=1	hypothetical protein JCGZ_13603 [Jatropha curcas]
	VF21059	0.142281	2.18142	0.475807	0.613522	0.793643	0.696164	BURP domain-containing protein 17 (Precursor) OS=Oryza sativa subsp. japonica (Rice) PE=2 SV=1	Dehydration-responsive protein RD22 precursor, putative [Ricinus communis]
	VF21147	0	2.66178	0	0.898325	0	0	Protein IDA (Precursor) GN=IDA OS=Arabidopsis thaliana (Mouse-ear cress) PE=2 SV=1	conserved hypothetical protein [Ricinus communis]
	VF21407	0.395065	1.37003	0.238535	0.0390352	0.103075	0.627389	Glucose and ribitol dehydrogenase homolog 1 GN=At1g54870 OS=Arabidopsis thaliana (Mouse-ear cress) PE=2 SV=1	PREDICTED: glucose and ribitol dehydrogenase-like [Populus euphratica]
	VF21800	0	4.43371	2.10825	0	0	0	UDP-glycosyltransferase 88A1 GN=UGT88A1 OS=Arabidopsis thaliana (Mouse-ear cress) PE=2 SV=1	PREDICTED: UDP-glycosyltransferase 88A1-like [Eucalyptus grandis]
	VF22055	0.485403	3.80161	0.478845	0.494129	0.964263	0.598892	Probably inactive leucine-rich repeat receptor-like protein kinase At5g48380 (Precursor) GN=At5g48380 OS=Arabidopsis thaliana (Mouse-ear cress) PE=1 SV=1	serine-threonine protein kinase, plant-type, putative [Ricinus communis]
	VF22114	0.000250418	41.2469	13.6088	8.86959	20.4973	18.2091	Photosystem I reaction center subunit III, chloroplastic (Precursor) GN=PSAF OS=Arabidopsis thaliana (Mouse-ear cress) PE=1 SV=1	hypothetical protein JCGZ_07458 [Jatropha curcas]
	VF22272	0.623193	1.35333	0.557234	0.23959	0.0787855	0	--	hypothetical protein JCGZ_08549 [Jatropha curcas]
	VF22381	0.870233	18.4369	3.19358	0.324785	4.71912	1.7084	Chaperone protein dnaJ 11, chloroplastic (Precursor) GN=T19K4.170 OS=Arabidopsis thaliana (Mouse-ear cress) PE=1 SV=2	hypothetical protein JCGZ_06367 [Jatropha curcas]
	VF22450	0.519122	3.47226	0.75042	0.116032	0.387615	0.923799	Probable LRR receptor-like serine/threonine-protein kinase At3g47570 (Precursor) GN=At3g47570 OS=Arabidopsis thaliana (Mouse-ear cress) PE=2 SV=1	PREDICTED: probable LRR receptor-like serine/threonine-protein kinase At3g47570 isoform X2 [Pyrus x bretschneideri]
	VF22913	1.84932	11.7148	0.529235	4.92681	1.40102	1.36391	Endochitinase PR4 (Precursor) GN=CHI4 OS=Phaseolus vulgaris (Kidney bean) PE=2 SV=1	PREDICTED: endochitinase PR4 [Vitis vinifera]
	VF23031	0.550875	10.5308	0.563428	0.662421	2.40985	1.76535	Probable galacturonosyltransferase-like 10 GN=MZF16.17 OS=Arabidopsis thaliana (Mouse-ear cress) PE=2 SV=1	hypothetical protein JCGZ_09675 [Jatropha curcas]
	VF23059	0	1.91464	0.81228	0	0.496955	0.597834	Metacaspase-9 subunit p10 GN=F21E1.120 OS=Arabidopsis thaliana (Mouse-ear cress) PE=1 SV=1	caspase, putative [Ricinus communis]
	VF23186	0.75879	7.36323	0.58547	0	2.68084	0	--	unknown [Populus trichocarpa]
	VF23442	2.54429	6.42805	1.5956	2.90441	1.85438	1.60303	UDP-glycosyltransferase 79B6 GN=UGT79B6 OS=Arabidopsis thaliana (Mouse-ear cress) PE=2 SV=1	UDP-Glycosyltransferase superfamily protein [Theobroma cacao]
	VF23465	3.94178	55.141	6.26881	4.46371	12.4391	7.62314	Probable CCR4-associated factor 1 homolog 11 GN=CAF1-11 OS=Arabidopsis thaliana (Mouse-ear cress) PE=2 SV=1	hypothetical protein JCGZ_20215 [Jatropha curcas]
	VF23632	0	4.08029	1.83144	0	1.63302	0.89152	--	hypothetical protein JCGZ_12303 [Jatropha curcas]
	VF23805	4.66668	10.3189	2.20557	3.42489	1.49648	0.916794	Phospholipase A1-IIgamma GN=DSEL OS=Arabidopsis thaliana (Mouse-ear cress) PE=1 SV=1	hypothetical protein JCGZ_24110 [Jatropha curcas]
	VF24157	0.741959	2.12839	0.221727	0.834825	0.368327	0.455295	--	hypothetical protein JCGZ_20526 [Jatropha curcas]
	VF24375	0.241625	1.30451	0.572773	0.321932	0.571385	0.508814	Lupeol synthase OS=Ricinus communis (Castor bean) PE=1 SV=1	hypothetical protein JCGZ_06057 [Jatropha curcas]
	VF24422	0.283508	1.70261	0.429745	0.328233	0.326772	0.281943	--	N-acetyltransferase, putative [Ricinus communis]
	VF24879	3.60373	11.2306	4.5444	3.45763	3.41943	4.24208	L-cysteine desulfhydrase GN=LCD OS=Arabidopsis thaliana (Mouse-ear cress) PE=2 SV=1	hypothetical protein JCGZ_23168 [Jatropha curcas]
	VF25437	0.694618	3.569	0.799314	0.658876	1.30143	0.983335	Probable xyloglucan endotransglucosylase/hydrolase protein 23 (Precursor) GN=F14M19.90 OS=Arabidopsis thaliana (Mouse-ear cress) PE=2 SV=1	hypothetical protein JCGZ_08704 [Jatropha curcas]
	VF25450	1.59324	5.21134	0.686472	1.38375	2.04452	1.43402	Lupeol synthase OS=Ricinus communis (Castor bean) PE=1 SV=1	RecName: Full=Lupeol synthase [Ricinus communis]
	VF25458	0.50287	11.8408	0	1.95656	4.75353	0.440806	Calcium-binding protein PBP1 GN=F24B18.11 OS=Arabidopsis thaliana (Mouse-ear cress) PE=1 SV=1	hypothetical protein JCGZ_13820 [Jatropha curcas]
	VF25646	0.023942	1.50245	0.351783	0.102213	0.435261	0.214695	Cation/calcium exchanger 1 OS=Arabidopsis thaliana (Mouse-ear cress) PE=2 SV=1	Sodium/potassium/calcium exchanger 6 precursor, putative [Ricinus communis]
	VF25894	1.1756	2.38669	1.13251	1.14933	0.930506	0.50464	--	hypothetical protein JCGZ_05861 [Jatropha curcas]
	VF26614	3.43441e-54	1.68668	4.40903e-11	1.19003e-15	0.000314129	0.0047126	AP-3 complex subunit delta GN=F11I4.7 OS=Arabidopsis thaliana (Mouse-ear cress) PE=1 SV=1	hypothetical protein JCGZ_05913 [Jatropha curcas]
	VF26795	154.933	390.935	152.514	117.333	107.178	74.4663	Germin-like protein subfamily 1 member 16 (Precursor) GN=At5g39130 OS=Arabidopsis thaliana (Mouse-ear cress) PE=2 SV=1	hypothetical protein JCGZ_09551 [Jatropha curcas]
	VF26817	6.49911	17.4089	6.64316	4.09149	6.20895	3.64463	Scarecrow-like protein 14 GN=SCL14 OS=Arabidopsis thaliana (Mouse-ear cress) PE=2 SV=2	hypothetical protein JCGZ_02976 [Jatropha curcas]
	VF27127	0	3.07265	0	0	0	0	Acidic endochitinase SE2 (Precursor) GN=SE2 OS=Beta vulgaris (Sugar beet) PE=1 SV=1	hypothetical protein POPTR_0012s01160g [Populus trichocarpa]
	VF27187	8.43256	104.568	14.8801	11.5396	40.1155	20.0259	BURP domain-containing protein 3 (Precursor) OS=Oryza sativa subsp. japonica (Rice) PE=2 SV=1	hypothetical protein JCGZ_06575 [Jatropha curcas]
	VF27434	0.618982	4.70079	1.33234	0.720305	1.25748	1.30836	Flavonol synthase/flavanone 3-hydroxylase GN=FL OS=Petunia hybrida (Petunia) PE=2 SV=1	2-oxoglutarate (2OG) and Fe(II)-dependent oxygenase superfamily protein [Theobroma cacao]
	VF27477	0.314399	1.27998	0.476557	0.481915	0.574588	0.0299271	Allene oxide synthase, chloroplastic (Precursor) GN=CYP74A OS=Linum usitatissimum (Flax) PE=1 SV=1	hypothetical protein JCGZ_10035 [Jatropha curcas]
	VF27527	0.362189	2.62991	0.124319	0.0820405	0.239005	0.105603	Acid phosphatase 1 (Precursor) GN=APS1 OS=Solanum lycopersicum (Tomato) PE=2 SV=1	PREDICTED: acid phosphatase 1-like [Eucalyptus grandis]
	VF27579	0.54253	3.21671	0.996828	1.44686	1.20806	0.935312	--	hypothetical protein JCGZ_06329 [Jatropha curcas]
	VF27765	3.73586	8.64956	2.97025	3.69156	2.58324	3.88295	--	conserved hypothetical protein [Ricinus communis]
	VF27859	0	1.32296	0	0.072385	0.0660755	0	Alpha-amylase/subtilisin inhibitor (Precursor) GN=OSJNBa0038O10.14 OS=Oryza sativa subsp. japonica (Rice) PE=1 SV=2	hypothetical protein JCGZ_21019 [Jatropha curcas]
	VF28280	0	2.51605	0	0.63537	0	0	--	oxidoreductase, putative [Ricinus communis]
	VFNG1353	0.182176	1.56475	0.49272	0.0796706	0.234721	0.597758	--	PREDICTED: uncharacterized protein LOC104590989 [Nelumbo nucifera]
	VFNG1525	1.10145	2.28776	0.230942	0.398651	0.50141	0.664825	DELLA protein GAI1 GN=GAI1 OS=Vitis vinifera (Grape) PE=2 SV=1	PREDICTED: DELLA protein GAIP-like isoform X3 [Populus euphratica]
	VFNG1526	0.608265	2.31482	0.965735	0.91043	0.677997	0	--	PREDICTED: DELLA protein GAIP-like isoform X3 [Populus euphratica]
	VFNG2320	0.147442	1.33475	0.422712	0.090157	0.462461	0.281527	MEPFL8 {ECO:0000305} (Precursor) GN=F18B13 OS=Arabidopsis thaliana (Mouse-ear cress) PE=1 SV=1	hypothetical protein JCGZ_13343 [Jatropha curcas]
	VFNG2479	0	1.67085	0	0	0.775213	0	Endonuclease OS=Nicotiana tabacum (Common tobacco) PE=2 SV=1	gag-pol polyprotein [Populus deltoides]
	VFNG3227	0.684434	1.71087	0.741083	0.731445	0.124381	0	Endonuclease OS=Nicotiana tabacum (Common tobacco) PE=2 SV=1	PREDICTED: uncharacterized protein LOC104883959 [Beta vulgaris subsp. vulgaris]
	VFNG3625	8.31734e-05	1.82885	0.0696792	0.22517	0.549217	0.315192	Ethylene-responsive transcription factor 1A OS=Arabidopsis thaliana (Mouse-ear cress) PE=1 SV=2	hypothetical protein JCGZ_03452 [Jatropha curcas]
	VFNG3626	2.66684	15.5862	2.73611	2.09335	4.09468	2.54377	Ethylene-responsive transcription factor 5 GN=MQL5_9 OS=Arabidopsis thaliana (Mouse-ear cress) PE=2 SV=1	hypothetical protein JCGZ_03451 [Jatropha curcas]
	VFNG3964	2.4113	7.07767	0.901928	1.0916	1.89965	3.23131	Ethylene-responsive transcription factor ERF114 GN=ERF114 OS=Arabidopsis thaliana (Mouse-ear cress) PE=2 SV=1	PREDICTED: ethylene-responsive transcription factor ERF113 [Nelumbo nucifera]
	VFNG4038	0.546535	2.47616	0.310172	0.211041	0.212382	0.311661	Mini zinc finger protein 2 GN=MIF2 OS=Arabidopsis thaliana (Mouse-ear cress) PE=1 SV=1	hypothetical protein JCGZ_19845 [Jatropha curcas]
	VFNG4419	0	2.01728	0.162178	0	0.554617	0.0487491	MLP-like protein 328 GN=MLP328 OS=Arabidopsis thaliana (Mouse-ear cress) PE=2 SV=1	hypothetical protein JCGZ_04717 [Jatropha curcas]
	VFNG4862	0	5.25303	0.0101421	0.0113238	2.5645	0	Serine/threonine-protein phosphatase 7 long form homolog GN=At1g48120 OS=Arabidopsis thaliana (Mouse-ear cress) PE=2 SV=1	unnamed protein product, partial [Coffea canephora]
	VFNG5464	0	3.77832	0	0	1.52335	0.0858935	--	heat shock protein, putative [Ricinus communis]
	VFNG5793	0.30142	3.75601	1.21478	1.53517	1.33251	1.0711	--	hypothetical protein JCGZ_20373 [Jatropha curcas]
	VFNG5866	1.2915e-05	5.17132	1.19441	0.703815	0.796442	0.150952	Zinc-finger homeodomain protein 4 GN=F14L17.21 OS=Arabidopsis thaliana (Mouse-ear cress) PE=1 SV=1	transcription factor, putative [Ricinus communis]
	VFNG6327	0.733603	3.79553	0.372358	0.676616	0.549191	0.669048	Geraniol 8-hydroxylase GN=CYP76B10 OS=Swertia mussotii (Felwort) PE=1 SV=1	cytochrome P450, putative [Ricinus communis]
C3-specific	VF00027	8.55027	20.6907	46.7799	6.97323	8.52665	8.27827	Protein TRANSPARENT TESTA 12 GN=F17J16_80 OS=Arabidopsis thaliana (Mouse-ear cress) PE=2 SV=1	multidrug resistance pump, putative [Ricinus communis]
	VF00187	21.4452	22.1507	48.6921	9.76632	9.84036	21.9759	--	hypothetical protein JCGZ_13300 [Jatropha curcas]
	VF00203	0.18	4.23481	10.2818	0.216633	0.885891	2.24362	--	hypothetical protein JCGZ_19812 [Jatropha curcas]
	VF00503	1.10794	0.892077	4.69825	1.08792	0.762846	0.0333429	Scarecrow-like protein 32 GN=SCL32 OS=Arabidopsis thaliana (Mouse-ear cress) PE=2 SV=1	hypothetical protein JCGZ_12517 [Jatropha curcas]
	VF00809	0.929137	1.05556	4.04278	0.388756	0.532263	0.934108	Probable LRR receptor-like serine/threonine-protein kinase At3g47570 (Precursor) GN=At3g47570 OS=Arabidopsis thaliana (Mouse-ear cress) PE=2 SV=1	PREDICTED: probable LRR receptor-like serine/threonine-protein kinase At3g47570 [Eucalyptus grandis]
	VF00949	3.76492	7.73427	39.1104	2.5277	1.29629	0.540439	Abscisic acid 8&apos;-hydroxylase 4 GN=CYP707A4 OS=Arabidopsis thaliana (Mouse-ear cress) PE=2 SV=2	cytochrome P450, putative [Ricinus communis]
	VF01068	6.2676	20.6179	54.9148	2.53675	2.23306	3.49888	Major pollen allergen Bet v 1-F/I GN=BETV1I OS=Betula pendula (European white birch) PE=1 SV=2	hypothetical protein JCGZ_09815 [Jatropha curcas]
	VF01840	25.1148	36.6606	103.487	16.121	17.6024	10.0507	MEPFL1 {ECO:0000305} (Precursor) GN=F18D22.80 OS=Arabidopsis thaliana (Mouse-ear cress) PE=1 SV=1	hypothetical protein JCGZ_18644 [Jatropha curcas]
	VF01891	0.595045	1.63532	7.96139	0.155738	0.44636	0.459797	--	conserved hypothetical protein [Ricinus communis]
	VF02095	0.402748	1.3076	3.54333	0.292959	1.09597	1.1415	Cationic amino acid transporter 1 GN=F7J7.60 OS=Arabidopsis thaliana (Mouse-ear cress) PE=1 SV=1	hypothetical protein JCGZ_09244 [Jatropha curcas]
	VF02212	1.54068	14.5458	41.5485	0.168379	1.16063	0.363034	Endoglucanase 9 (Precursor) GN=CEL3 OS=Arabidopsis thaliana (Mouse-ear cress) PE=1 SV=1	hypothetical protein JCGZ_17191 [Jatropha curcas]
	VF02297	25.5348	24.4072	78.1655	26.6418	15.0693	35.3846	Chalcone--flavonone isomerase GN=CHI OS=Pyrus communis (Pear) PE=2 SV=1	hypothetical protein JCGZ_06610 [Jatropha curcas]
	VF02547	0.130074	1.06024	6.66385	0.135249	0.338426	0.653179	WAT1-related protein At5g07050 GN=At5g07050 OS=Arabidopsis thaliana (Mouse-ear cress) PE=2 SV=1	hypothetical protein JCGZ_24570 [Jatropha curcas]
	VF02686	0	0	4.93869	0	0	0	--	hypothetical protein JCGZ_04599 [Jatropha curcas]
	VF02690	0.836837	0.950706	2.25442	0.511066	0.52042	0.262894	Cytochrome b561 domain-containing protein At4g18260 (Precursor) GN=At4g18260 OS=Arabidopsis thaliana (Mouse-ear cress) PE=2 SV=1	hypothetical protein JCGZ_04603 [Jatropha curcas]
	VF02858	0.230171	0.732499	1.55553	0.337361	0.495177	0.0903528	Probable WRKY transcription factor 65 GN=WRKY65 OS=Arabidopsis thaliana (Mouse-ear cress) PE=2 SV=1	WRKY transcription factor, putative [Ricinus communis]
	VF02859	4.9133	4.12864	11.8211	0.372827	0.855401	0.61348	--	hypothetical protein JCGZ_21599 [Jatropha curcas]
	VF02892	1.37242	2.14417	21.5546	0.95437	0.36992	1.28095	Protein LIGHT-DEPENDENT SHORT HYPOCOTYLS 10 GN=F14N22 OS=Arabidopsis thaliana (Mouse-ear cress) PE=1 SV=1	conserved hypothetical protein [Ricinus communis]
	VF03080	0.633759	4.32876	15.1937	0.387717	1.6315	1.10865	--	conserved hypothetical protein [Ricinus communis]
	VF03276	0.202053	0.287465	1.0343	0.0281282	0.13152	0.317255	RING-H2 finger protein ATL1 GN=ATL1 OS=Arabidopsis thaliana (Mouse-ear cress) PE=2 SV=1	ring finger protein, putative [Ricinus communis]
	VF03360	1.228	1.8139	4.14988	1.17258	1.35135	1.99302	Myb family transcription factor APL GN=APL OS=Arabidopsis thaliana (Mouse-ear cress) PE=2 SV=2	transcription factor, putative [Ricinus communis]
	VF03736	0.194992	0.409637	1.07015	0.0426313	0.0969473	0.1698	Ribosome-inactivating protein karasurin-A (Precursor) OS=Trichosanthes kirilowii (Chinese snake gourd) PE=1 SV=2	hypothetical protein JCGZ_10887 [Jatropha curcas]
	VF04082	0.434143	0.771455	3.28859	0.137216	0.160215	0.259049	Probable WRKY transcription factor 16 GN=WRKY16 OS=Arabidopsis thaliana (Mouse-ear cress) PE=2 SV=1	hypothetical protein JCGZ_17178 [Jatropha curcas]
	VF04189	0.996167	4.77409	15.3517	0.53062	1.34113	1.39339	--	hypothetical protein JCGZ_02333 [Jatropha curcas]
	VF04359	0.106623	0.349168	1.14639	0.242251	0.0997514	0.432173	1-aminocyclopropane-1-carboxylate oxidase homolog 1 GN=At1g06620 OS=Arabidopsis thaliana (Mouse-ear cress) PE=2 SV=1	hypothetical protein JCGZ_06784 [Jatropha curcas]
	VF04432	1.52094	14.1888	39.3238	2.32198	9.00551	18.3206	--	hypothetical protein JCGZ_25365 [Jatropha curcas]
	VF04853	0.369811	1.22779	3.98106	0.947008	0.190761	0.119827	Probable LRR receptor-like protein kinase At1g51890 (Precursor) GN=At1g51890 OS=Arabidopsis thaliana (Mouse-ear cress) PE=2 SV=2	hypothetical protein JCGZ_26888 [Jatropha curcas]
	VF05139	6.97975	7.51228	17.4311	5.41977	1.90448	1.23282	Transcription factor WER GN=T9L3.50 OS=Arabidopsis thaliana (Mouse-ear cress) PE=1 SV=1	hypothetical protein JCGZ_11479 [Jatropha curcas]
	VF05150	0.621215	2.86435	9.08536	0.564677	3.58551	3.1054	Polyamine oxidase (Precursor) GN=PAO OS=Zea mays (Maize) PE=1 SV=1	hypothetical protein JCGZ_11488 [Jatropha curcas]
	VF05203	0.739751	1.74773	3.88535	0.603866	0.560169	1.0313	Formin-like protein 8 (Precursor) GN=FH8 OS=Arabidopsis thaliana (Mouse-ear cress) PE=1 SV=1	actin binding protein, putative [Ricinus communis]
	VF05248	0.933769	2.13774	4.73651	0.81769	1.20735	0.890762	RNA polymerase II C-terminal domain phosphatase-like 4 GN=CPL4 OS=Arabidopsis thaliana (Mouse-ear cress) PE=1 SV=1	conserved hypothetical protein [Ricinus communis]
	VF05713	0	0	1.29601	0	0.187347	0	--	hypothetical protein POPTR_0003s17410g [Populus trichocarpa]
	VF05886	0.434808	2.61601	8.07388	0.221112	0.726825	0.962242	Pectate lyase (Precursor) OS=Zinnia violacea (Garden zinnia) PE=1 SV=1	hypothetical protein JCGZ_10207 [Jatropha curcas]
	VF05900	2.56644	10.2095	37.0429	1.35874	2.84314	3.75879	GEM-like protein 5 GN=At5g13200 OS=Arabidopsis thaliana (Mouse-ear cress) PE=1 SV=1	hypothetical protein JCGZ_26850 [Jatropha curcas]
	VF05901	0.00647662	0.421679	1.06456	0	0.0123828	0	--	conserved hypothetical protein [Ricinus communis]
	VF06090	2.55836	7.76317	29.8047	1.71507	2.65936	1.37426	Laccase-6 (Precursor) GN=LAC6 OS=Arabidopsis thaliana (Mouse-ear cress) PE=2 SV=1	hypothetical protein JCGZ_14235 [Jatropha curcas]
	VF06277	1.22432	1.25526e-21	4.24382	1.39552	1.15915	1.22376	Putative ripening-related protein 1 (Precursor) GN=OSJNBa0081G05.7 OS=Oryza sativa subsp. japonica (Rice) PE=3 SV=2	Uncharacterized protein TCM_005354 [Theobroma cacao]
	VF06949	0.213198	3.32314	18.9455	1.08188	0.520048	0.797707	Thioredoxin-like protein CXXS1 GN=CXXS1 OS=Arabidopsis thaliana (Mouse-ear cress) PE=2 SV=2	hypothetical protein JCGZ_00799 [Jatropha curcas]
	VF06983	0.797746	9.4719	73.3839	0.102798	0.0906009	0	--	hypothetical protein JCGZ_00831 [Jatropha curcas]
	VF07308	0.642952	0.61911	1.9951	0.563135	0.173959	0.286278	--	hypothetical protein JCGZ_03717 [Jatropha curcas]
	VF07417	0.635243	6.46481	28.8986	0.118259	0.128726	0.40087	Transcription factor BEE 1 OS=Arabidopsis thaliana (Mouse-ear cress) PE=2 SV=1	hypothetical protein JCGZ_18352 [Jatropha curcas]
	VF07600	0.218475	0.241054	1.88222	0.470435	0.0579	0.829956	--	hypothetical protein JCGZ_15086 [Jatropha curcas]
	VF07712	2.1118	12.8408	36.5922	0.718986	1.80011	0.192343	Scarecrow-like protein 32 GN=SCL32 OS=Arabidopsis thaliana (Mouse-ear cress) PE=2 SV=1	hypothetical protein JCGZ_20291 [Jatropha curcas]
	VF07990	0.971886	1.77405	10.8606	0.783054	0.746402	1.41057	Indole-3-acetate O-methyltransferase 1 GN=IAMT1 OS=Arabidopsis thaliana (Mouse-ear cress) PE=1 SV=1	Benzoate carboxyl methyltransferase, putative [Ricinus communis]
	VF08109	0.610792	1.1577	2.4603	0.441651	0.352132	0.851104	Protein NRT1/ PTR FAMILY 5.6 GN=NPF5.6 OS=Arabidopsis thaliana (Mouse-ear cress) PE=2 SV=1	hypothetical protein JCGZ_08336 [Jatropha curcas]
	VF08490	0.850592	1.0306	11.6806	0.29176	0.74452	0.386602	Cytochrome P450 89A2 GN=F13O11.20 OS=Arabidopsis thaliana (Mouse-ear cress) PE=2 SV=2	cytochrome P450, putative [Ricinus communis]
	VF08535	0.284288	0.367573	1.93628	0.0147262	0.0930522	0.25552	UPF0481 protein At3g47200 GN=At3g47200 OS=Arabidopsis thaliana (Mouse-ear cress) PE=2 SV=1	hypothetical protein JCGZ_10900 [Jatropha curcas]
	VF08676	4.88793	5.4326	11.0379	3.6086	3.69882	2.93766	--	PREDICTED: endo-1,4-beta-xylanase A-like isoform X2 [Populus euphratica]
	VF08695	3.65732	8.09313	23.6139	2.05488	1.56591	2.47187	Germin-like protein subfamily 1 member 13 (Precursor) GN=GLP6 OS=Arabidopsis thaliana (Mouse-ear cress) PE=2 SV=2	hypothetical protein JCGZ_10285 [Jatropha curcas]
	VF08828	0.0209801	0.104855	1.40146	0.0657719	0.0602585	0.0558787	Leucine-rich repeat receptor protein kinase EXS (Precursor) GN=T28J14.220 OS=Arabidopsis thaliana (Mouse-ear cress) PE=1 SV=1	hypothetical protein JCGZ_25360 [Jatropha curcas]
	VF09053	0.660903	9.35925	21.2871	0.352594	1.16209	0.375556	--	hypothetical protein JCGZ_06487 [Jatropha curcas]
	VF09135	1.09452	18.8409	39.1268	0.231055	0.056191	0.075756	Protein YLS3 (Precursor) GN=YLS3 OS=Arabidopsis thaliana (Mouse-ear cress) PE=2 SV=1	hypothetical protein JCGZ_13252 [Jatropha curcas]
	VF09499	0	3.91293	27.6205	0	0.906783	1.3856	Auxin response factor 4 GN=OSJNBa0093F16.35 OS=Oryza sativa subsp. japonica (Rice) PE=2 SV=1	transcription factor, putative [Ricinus communis]
	VF09600	0.594263	0.63453	3.6913	0.95684	0.339005	0.401823	7-deoxyloganetic acid glucosyltransferase GN=UGT709C2 OS=Catharanthus roseus (Madagascar periwinkle) PE=1 SV=1	hypothetical protein POPTR_0008s06270g [Populus trichocarpa]
	VF09604	5.9909	8.9436	48.1259	6.33132	12.3614	0	7-deoxyloganetic acid glucosyltransferase GN=UGT709C2 OS=Catharanthus roseus (Madagascar periwinkle) PE=1 SV=1	hypothetical protein JCGZ_01350 [Jatropha curcas]
	VF09777	0.310313	0.40794	2.00749	0.214728	0.155945	0.414761	Protein NRT1/ PTR FAMILY 2.3 GN=NPF2.3 OS=Arabidopsis thaliana (Mouse-ear cress) PE=2 SV=1	hypothetical protein JCGZ_05595 [Jatropha curcas]
	VF09783	5.32553e-05	3.37556e-05	1.72369	5.42349e-05	7.4873e-05	0.00178877	NEDD8-specific protease 1 GN=F15L12.8 OS=Arabidopsis thaliana (Mouse-ear cress) PE=2 SV=1	hypothetical protein JCGZ_05591 [Jatropha curcas]
	VF09911	4.0586e-05	1.39713	5.17068	0.73105	1.81257	1.33522	Leucine-rich repeat receptor-like protein CLAVATA2 (Precursor) GN=T8F5.16 OS=Arabidopsis thaliana (Mouse-ear cress) PE=1 SV=1	hypothetical protein JCGZ_23132 [Jatropha curcas]
	VF10200	0.532992	0.50655	2.51624	1.02155	0.370728	0.579322	L-type lectin-domain containing receptor kinase IX.1 (Precursor) GN=LECRK91 OS=Arabidopsis thaliana (Mouse-ear cress) PE=2 SV=1	hypothetical protein JCGZ_09935 [Jatropha curcas]
	VF10262	176.432	150.068	420.28	99.2683	106.021	66.8705	Leucoanthocyanidin dioxygenase GN=ANS OS=Malus domestica (Apple) PE=2 SV=1	hypothetical protein JCGZ_20688 [Jatropha curcas]
	VF10274	0.123639	0.315584	1.01314	0.246917	0.324253	0.499447	Phospholipase D beta 1 GN=PLDBETA1 OS=Arabidopsis thaliana (Mouse-ear cress) PE=2 SV=4	hypothetical protein JCGZ_20700 [Jatropha curcas]
	VF10346	5.15261	19.5255	40.3906	4.76168	8.46431	17.7508	Probable pectinesterase 53 (Precursor) GN=T29J13.150 OS=Arabidopsis thaliana (Mouse-ear cress) PE=2 SV=1	hypothetical protein JCGZ_06482 [Jatropha curcas]
	VF10877	6.44642	54.1908	309.214	21.2857	44.837	29.8344	Putative lipid-transfer protein DIR1 (Precursor) GN=DIR1 OS=Arabidopsis thaliana (Mouse-ear cress) PE=1 SV=1	hypothetical protein JCGZ_10060 [Jatropha curcas]
	VF11001	6.54862	10.9971	23.2865	7.49732	4.48299	10.306	--	hypothetical protein POPTR_0014s13600g [Populus trichocarpa]
	VF11135	0.271418	0.707402	1.87094	0	0.265184	0.870779	--	hypothetical protein POPTR_0001s15930g [Populus trichocarpa]
	VF11376	0	0.135791	2.85611	0.0452811	0	0.354525	Probable caffeine synthase 4 GN=CS4 OS=Coffea arabica (Arabian coffee) PE=2 SV=1	hypothetical protein JCGZ_18506 [Jatropha curcas]
	VF11588	5.60941	18.5142	62.4958	0.917047	2.57389	5.6028	L-galactono-1,4-lactone dehydrogenase, mitochondrial (Precursor) GN=GLDH OS=Arabidopsis thaliana (Mouse-ear cress) PE=1 SV=1	gulonolactone oxidase, putative [Ricinus communis]
	VF11642	0.520469	0.866738	6.19548	0.206747	0.33166	1.80541	Mannan endo-1,4-beta-mannosidase 4 (Precursor) GN=MAN4 OS=Solanum lycopersicum (Tomato) PE=1 SV=2	hypothetical protein JCGZ_14142 [Jatropha curcas]
	VF11809	0.0887288	1.12918	5.58333	0.0560325	0.215362	0.051436	Protein ASPARTIC PROTEASE IN GUARD CELL 2 (Precursor) GN=ASPG2 OS=Arabidopsis thaliana (Mouse-ear cress) PE=2 SV=1	Aspartic proteinase nepenthesin-2 precursor, putative [Ricinus communis]
	VF11810	13.3783	32.2724	137.261	10.4571	11.7128	54.7989	Protein ASPARTIC PROTEASE IN GUARD CELL 1 (Precursor) GN=ASPG1 OS=Arabidopsis thaliana (Mouse-ear cress) PE=1 SV=1	hypothetical protein JCGZ_07056 [Jatropha curcas]
	VF11919	9.78787	10.8808	22.4241	6.72471	6.1434	4.14924	Probable LRR receptor-like serine/threonine-protein kinase At1g56130 (Precursor) GN=At1g56130 OS=Arabidopsis thaliana (Mouse-ear cress) PE=2 SV=2	hypothetical protein JCGZ_07156 [Jatropha curcas]
	VF11942	0.588437	4.3206	12.9995	0.0963018	0.0951331	0.930679	Glutamate receptor 2.7 (Precursor) GN=GLR2.7 OS=Arabidopsis thaliana (Mouse-ear cress) PE=2 SV=3	glutamate receptor 2 plant, putative [Ricinus communis]
	VF11992	0.285118	0.541758	2.29903	0.221558	0.421602	0	Probable glutathione S-transferase OS=Nicotiana tabacum (Common tobacco) PE=2 SV=1	hypothetical protein JCGZ_17443 [Jatropha curcas]
	VF12149	0	0	8.37333	0	0	0	Pyruvate dehydrogenase E1 component subunit alpha-2, mitochondrial (Precursor) GN=IAR4 OS=Arabidopsis thaliana (Mouse-ear cress) PE=1 SV=2	PREDICTED: pyruvate dehydrogenase E1 component subunit alpha, mitochondrial-like [Phoenix dactylifera]
	VF12272	1.57198	0.804838	3.29317	0.501843	1.1698	1.33264	Transcription factor LAX PANICLE OS=Oryza sativa subsp. japonica (Rice) PE=1 SV=1	hypothetical protein JCGZ_00446 [Jatropha curcas]
	VF12295	2.28694	6.35961	13.4319	1.70106	2.46219	1.49941	--	hypothetical protein JCGZ_25002 [Jatropha curcas]
	VF12519	15.3426	15.4861	46.7225	12.6411	8.28129	8.75288	Kaempferol 3-O-beta-D-galactosyltransferase (Precursor) OS=Petunia hybrida (Petunia) PE=1 SV=1	hypothetical protein JCGZ_09943 [Jatropha curcas]
	VF12525	0.510583	1.13111	3.32465	0.42573	1.24891	0.691645	--	hypothetical protein JCGZ_22902 [Jatropha curcas]
	VF12629	15.3584	51.426	109.354	2.2736	5.89868	13.5359	Potassium transporter 5 GN=T9E8.160 OS=Arabidopsis thaliana (Mouse-ear cress) PE=1 SV=1	Potassium transporter, putative [Ricinus communis]
	VF12679	0.2097	0.781334	2.23911	0.00249899	0.000159514	0.0643805	--	hypothetical protein JCGZ_02757 [Jatropha curcas]
	VF12729	0.04712	2.36946	21.3747	0.0556958	0.527873	2.33666	GDSL esterase/lipase 1 (Precursor) GN=GLIP1 OS=Arabidopsis thaliana (Mouse-ear cress) PE=1 SV=1	zinc finger protein, putative [Ricinus communis]
	VF13094	15.7218	39.3955	105.644	9.79364	13.5729	13.6682	Protein trichome birefringence-like 36 GN=TBL36 OS=Arabidopsis thaliana (Mouse-ear cress) PE=2 SV=1	hypothetical protein JCGZ_10440 [Jatropha curcas]
	VF13278	0.652357	0.57535	2.23212	0.373617	0.146729	0.560365	UDP-glycosyltransferase 91A1 GN=UGT91A1 OS=Arabidopsis thaliana (Mouse-ear cress) PE=2 SV=1	hypothetical protein JCGZ_18713 [Jatropha curcas]
	VF13322	0	0.56051	4.78245	0.5441	2.36032	2.22335	--	hypothetical protein POPTR_0018s11350g [Populus trichocarpa]
	VF13430	1.7925	3.70332	13.7471	1.07527	0.921396	1.14783	21 kDa protein (Precursor) OS=Daucus carota (Wild carrot) PE=2 SV=1	hypothetical protein JCGZ_20772 [Jatropha curcas]
	VF13472	16.5346	37.8074	88.3386	10.4815	19.6838	41.7178	Dihydroflavonol-4-reductase GN=DFR OS=Gerbera hybrida (Daisy) PE=2 SV=1	nadhp hc toxin reductase, putative [Ricinus communis]
	VF13863	0	0.152115	1.44734	0	0.0455766	0.0311027	Peroxidase 25 (Precursor) GN=T26J13.7 OS=Arabidopsis thaliana (Mouse-ear cress) PE=2 SV=2	PREDICTED: LOW QUALITY PROTEIN: peroxidase 25 [Prunus mume]
	VF13938	0.964265	2.69923	8.922	1.17062	0.41145	0.071559	Putative homeobox-leucine zipper protein ATHB-51 OS=Arabidopsis thaliana (Mouse-ear cress) PE=2 SV=2	hypothetical protein JCGZ_16625 [Jatropha curcas]
	VF13974	0.466445	0.374761	1.03607	0.326213	0.345633	0.380615	UPF0481 protein At3g47200 GN=At3g47200 OS=Arabidopsis thaliana (Mouse-ear cress) PE=2 SV=1	PREDICTED: UPF0481 protein At3g47200-like [Populus euphratica]
	VF13990	3.10262	7.37082	16.8532	5.79725	2.98156	2.20238	--	hypothetical protein JCGZ_23656 [Jatropha curcas]
	VF14073	9.11829	14.447	40.0304	12.3395	16.0571	18.1793	Phenylalanine ammonia-lyase GN=PAL OS=Populus trichocarpa (Western balsam poplar) PE=2 SV=1	phenylalanine ammonia lyase [Jatropha curcas]
	VF14559	1.48509	5.00386	22.6611	2.45843	5.06069	2.00334	Caffeic acid 3-O-methyltransferase 1 GN=OMT1 OS=Populus tremuloides (Quaking aspen) PE=1 SV=1	hypothetical protein JCGZ_16601 [Jatropha curcas]
	VF15167	0.363775	0.427147	2.63653	0.39942	0.215687	1.26221	MADS-box protein defh21 GN=DEFH21 OS=Antirrhinum majus (Garden snapdragon) PE=2 SV=1	mads box protein, putative [Ricinus communis]
	VF15169	0.334015	1.76287	6.05702	0.422924	0.203999	0.841662	Heavy metal-associated isoprenylated plant protein 26 (Precursor) GN=F20M13.140 OS=Arabidopsis thaliana (Mouse-ear cress) PE=1 SV=1	hypothetical protein POPTR_0005s16490g [Populus trichocarpa]
	VF15229	8.80675	10.0324	21.2817	5.07262	8.11385	8.37438	Auxin transporter-like protein 3 GN=LAX3 OS=Medicago truncatula (Barrel medic) PE=2 SV=1	hypothetical protein JCGZ_12057 [Jatropha curcas]
	VF15661	0.176377	0.548823	1.43942	0.343901	0.297761	0.643674	Pectinesterase 54 (Precursor) GN=F22D1.30 OS=Arabidopsis thaliana (Mouse-ear cress) PE=2 SV=1	hypothetical protein JCGZ_07521 [Jatropha curcas]
	VF15675	154.822	244.802	525.299	138.566	134.871	110.757	Sucrose synthase GN=SS OS=Glycine max (Soybean) PE=1 SV=2	hypothetical protein JCGZ_07549 [Jatropha curcas]
	VF15809	19.725	12.6454	63.041	18.076	6.46406	10.9844	Galactinol synthase 2 GN=GOLS2 OS=Solanum lycopersicum (Tomato) PE=2 SV=1	conserved hypothetical protein [Ricinus communis]
	VF15923	0.409298	0.789403	2.50836	0.214877	0.18725	0.225643	Respiratory burst oxidase homolog protein B GN=RBOHB OS=Solanum tuberosum (Potato) PE=1 SV=1	hypothetical protein JCGZ_23317 [Jatropha curcas]
	VF16160	159.414	172.017	360.611	129.094	94.9463	56.6227	GRF1-interacting factor 1 GN=F4I4.20 OS=Arabidopsis thaliana (Mouse-ear cress) PE=1 SV=1	hypothetical protein JCGZ_23525 [Jatropha curcas]
	VF16536	0.51818	0.495161	1.89687	0.351077	0.334707	0.275763	Amino acid permease 2 GN=AAP2 OS=Arabidopsis thaliana (Mouse-ear cress) PE=1 SV=1	hypothetical protein JCGZ_18801 [Jatropha curcas]
	VF16550	1.76614	4.82437	15.6003	2.11704	1.85127	4.92062	DUF21 domain-containing protein At2g14520 GN=CBSDUF3 OS=Arabidopsis thaliana (Mouse-ear cress) PE=2 SV=2	Magnesium and cobalt efflux protein corC, putative [Ricinus communis]
	VF16667	0.531905	0.501228	1.66101	0	0.202769	0	--	conserved hypothetical protein [Ricinus communis]
	VF16943	0	0	19.2806	3.66003	0	0	CASP-like protein 1C2 GN=RCOM_0936380 OS=Ricinus communis (Castor bean) PE=3 SV=1	conserved hypothetical protein [Ricinus communis]
	VF16960	0	0.207034	1.29772	0.127263	0	0	Transcription factor bHLH36 GN=MIO24.9 OS=Arabidopsis thaliana (Mouse-ear cress) PE=2 SV=1	hypothetical protein POPTR_0011s05320g [Populus trichocarpa]
	VF16975	71.6198	112.475	233.158	64.0415	69.4343	115.546	Squamosa promoter-binding protein 1 GN=SBP1 OS=Antirrhinum majus (Garden snapdragon) PE=2 SV=1	Squamosa promoter-binding protein, putative [Ricinus communis]
	VF17056	1.18955	3.41509	6.95763	1.39936	1.61959	2.52669	Thaumatin-like protein (Precursor) OS=Oryza sativa subsp. japonica (Rice) PE=2 SV=1	hypothetical protein JCGZ_01425 [Jatropha curcas]
	VF17189	8.02964	11.4668	30.5378	4.20786	1.95738	13.3552	3-ketoacyl-CoA synthase 5 GN=F2J7.9 OS=Arabidopsis thaliana (Mouse-ear cress) PE=1 SV=1	acyltransferase, putative [Ricinus communis]
	VF17292	0.532125	0	1.52233	0	0	0.489226	Lichenase (Precursor) GN=GN1 OS=Nicotiana plumbaginifolia (Leadwort-leaved tobacco) PE=2 SV=3	beta-1,3-glucanase [Citrus sinensis]
	VF17318	0.883285	3.11054	10.8243	0.697225	0.834226	2.23602	Alpha carbonic anhydrase 7 (Precursor) GN=ACA7 OS=Arabidopsis thaliana (Mouse-ear cress) PE=2 SV=1	carbonic anhydrase, putative [Ricinus communis]
	VF17581	7.02069	3.96948	14.9001	5.85855	5.22804	2.21523	--	hypothetical protein JCGZ_13998 [Jatropha curcas]
	VF17721	0.210745	1.18156	4.89605	0.108169	0.250517	0.0673796	Cytochrome P450 724B1 GN=OSJNBa0016O02.25 OS=Oryza sativa subsp. japonica (Rice) PE=1 SV=1	cytochrome P450, putative [Ricinus communis]
	VF17814	0.0385994	0.384435	1.66495	0.0791982	0.227963	0.374857	Wall-associated receptor kinase-like 14 (Precursor) GN=WAKL14 OS=Arabidopsis thaliana (Mouse-ear cress) PE=2 SV=2	hypothetical protein JCGZ_04367 [Jatropha curcas]
	VF17819	0.0339879	0.000719631	3.68263	0.0374901	2.76944e-05	0.000209215	Cytochrome P450 82A3 GN=CYP82A3 OS=Glycine max (Soybean) PE=2 SV=1	hypothetical protein JCGZ_04359 [Jatropha curcas]
	VF17832	0.10433	0.884674	4.1687	0.107084	0.596468	0.414611	Cytochrome P450 82A3 GN=CYP82A3 OS=Glycine max (Soybean) PE=2 SV=1	hypothetical protein JCGZ_04351 [Jatropha curcas]
	VF18270	14.6474	32.6261	68.2366	8.99236	15.0681	16.2816	Cyclin-D1-1 GN=F20P5.7 OS=Arabidopsis thaliana (Mouse-ear cress) PE=1 SV=3	hypothetical protein JCGZ_21777 [Jatropha curcas]
	VF18355	3.65926	3.84857	9.45142	1.4122	0.570485	0.223366	Protein TOO MANY MOUTHS (Precursor) GN=F18B13.16 OS=Arabidopsis thaliana (Mouse-ear cress) PE=1 SV=1	serine-threonine protein kinase, plant-type, putative [Ricinus communis]
	VF18414	19.0498	27.3425	55.4271	15.3934	26.0022	11.1575	Rhodanese-like domain-containing protein 6 GN=STR6 OS=Arabidopsis thaliana (Mouse-ear cress) PE=2 SV=1	PREDICTED: dihydrofolate reductase-like [Populus euphratica]
	VF18556	0.433923	0.103738	1.92381	0.193282	0.274047	0.684028	Copper transport protein ATX1 GN=ATX1 OS=Arabidopsis thaliana (Mouse-ear cress) PE=1 SV=1	hypothetical protein JCGZ_05644 [Jatropha curcas]
	VF18568	0.796373	4.73172	11.8422	0.467742	1.85407	2.29135	Protein LURP-one-related 14 GN=At3g56180 OS=Arabidopsis thaliana (Mouse-ear cress) PE=2 SV=2	hypothetical protein JCGZ_03368 [Jatropha curcas]
	VF18669	0.400862	0.621839	1.46515	0.511913	0.510644	0.399193	UPF0481 protein At3g47200 GN=At3g47200 OS=Arabidopsis thaliana (Mouse-ear cress) PE=2 SV=1	hypothetical protein JCGZ_12448 [Jatropha curcas]
	VF18729	0.435401	0.656349	1.32699	0.20827	0.375234	0.421387	--	hypothetical protein JCGZ_12400 [Jatropha curcas]
	VF19056	25.3433	39.9147	105.047	13.027	20.1952	12.2865	HVA22-like protein c GN=HVA22C OS=Arabidopsis thaliana (Mouse-ear cress) PE=2 SV=1	hypothetical protein JCGZ_15587 [Jatropha curcas]
	VF19819	0	0.0102377	2.5063	0.0321889	0	0.250659	U11/U12 small nuclear ribonucleoprotein 59 kDa protein GN=SNRNP59 OS=Arabidopsis thaliana (Mouse-ear cress) PE=2 SV=1	hypothetical protein JCGZ_14321 [Jatropha curcas]
	VF19864	14.6628	23.1398	53.3428	10.6817	11.0132	10.6634	WEB family protein At2g40480 GN=At2g40480 OS=Arabidopsis thaliana (Mouse-ear cress) PE=2 SV=1	conserved hypothetical protein [Ricinus communis]
	VF19987	0.505963	0.384189	1.31133	0.560606	0.552886	0.120136	--	conserved hypothetical protein [Ricinus communis]
	VF20202	42.9916	173.327	348.438	55.4927	78.1285	72.2802	21 kDa protein (Precursor) OS=Daucus carota (Wild carrot) PE=2 SV=1	hypothetical protein JCGZ_04734 [Jatropha curcas]
	VF20265	1.1532	5.09118	12.4131	1.61399	2.39874	3.07478	Vacuolar iron transporter 1 GN=VIT1 OS=Arabidopsis thaliana (Mouse-ear cress) PE=2 SV=1	hypothetical protein JCGZ_04790 [Jatropha curcas]
	VF20356	0.511677	0.0893805	1.30512	0.081339	0	0.0516715	Probable transcriptional regulator RABBIT EARS GN=RBE OS=Arabidopsis thaliana (Mouse-ear cress) PE=2 SV=2	RABBIT EARS family protein [Populus trichocarpa]
	VF20445	0.51433	0.797943	1.61028	0.250794	0.477747	0.324094	Flavonol 4&apos;-sulfotransferase OS=Flaveria chlorifolia (Clasping yellowtops) PE=1 SV=1	Flavonol 4&apos;-sulfotransferase, putative [Ricinus communis]
	VF20738	9.99333	25.4601	74.4718	3.51623	4.52287	2.27951	Probable N-acetyltransferase HLS1 GN=F19F18.70 OS=Arabidopsis thaliana (Mouse-ear cress) PE=1 SV=1	hypothetical protein JCGZ_26986 [Jatropha curcas]
	VF20849	61.5831	217.924	499.568	25.9965	25.6632	120.385	Expansin-like B1 (Precursor) GN=dl4545c OS=Arabidopsis thaliana (Mouse-ear cress) PE=2 SV=2	Major pollen allergen Ory s 1 precursor, putative [Ricinus communis]
	VF20948	5.4833	20.4244	145.255	1.81772	2.64158	2.25939	Triacylglycerol lipase 2 (Precursor) GN=LIP2 OS=Arabidopsis thaliana (Mouse-ear cress) PE=2 SV=1	hypothetical protein JCGZ_10139 [Jatropha curcas]
	VF21009	0.768154	0.314398	1.56165	1.94906e-05	0.00647948	0.444392	5-oxoprolinase GN=OXP1 OS=Arabidopsis thaliana (Mouse-ear cress) PE=2 SV=1	hypothetical protein JCGZ_19361 [Jatropha curcas]
	VF21163	4.61444	8.3423	18.0373	3.99693	4.40266	8.4765	--	hypothetical protein JCGZ_21353 [Jatropha curcas]
	VF21645	2.62	2.96081	8.52152	2.42538	2.59012	1.89602	Protein CUP-SHAPED COTYLEDON 3 OS=Arabidopsis thaliana (Mouse-ear cress) PE=1 SV=1	transcription factor, putative [Ricinus communis]
	VF21663	0.158453	0.138991	1.63469	0.246387	0.127323	0.125434	Putative DNA-binding protein ESCAROLA GN=ESC OS=Arabidopsis thaliana (Mouse-ear cress) PE=2 SV=1	hypothetical protein JCGZ_08028 [Jatropha curcas]
	VF21703	4.20641	9.0629	27.3888	1.02909	0.557814	1.81151	Agamous-like MADS-box protein AGL11 GN=T5L19.90 OS=Arabidopsis thaliana (Mouse-ear cress) PE=1 SV=1	hypothetical protein JCGZ_07991 [Jatropha curcas]
	VF21878	6.79702	18.1984	41.2936	2.7944	6.71377	9.49115	Cytokinin riboside 5&apos;-monophosphate phosphoribohydrolase LOG1 GN=LOG1 OS=Arabidopsis thaliana (Mouse-ear cress) PE=1 SV=1	carboxy-lyase, putative [Ricinus communis]
	VF21901	12.8676	28.9907	62.7911	10.2256	8.89465	10.8505	Transcription factor bHLH93 GN=K21L13.16 OS=Arabidopsis thaliana (Mouse-ear cress) PE=1 SV=1	DNA binding protein, putative [Ricinus communis]
	VF22266	2.54396	5.03423	11.4802	0.481092	1.02432	0.754628	--	heat-shock protein, putative [Ricinus communis]
	VF22384	0.57491	0.443175	2.97101	0.209014	0.324982	0.486107	187-kDa microtubule-associated protein AIR9 GN=AIR9 OS=Arabidopsis thaliana (Mouse-ear cress) PE=2 SV=1	hypothetical protein JCGZ_09232 [Jatropha curcas]
	VF22408	2.07942	4.8968	12.0453	4.43892	3.0416	4.47618	--	hypothetical protein RCOM_0649410 [Ricinus communis]
	VF22461	1.22957	3.8983	10.298	1.62237	2.48578	4.5532	Protein XRI1 GN=XRI1 OS=Arabidopsis thaliana (Mouse-ear cress) PE=1 SV=2	hypothetical protein JCGZ_04839 [Jatropha curcas]
	VF22527	0.0322866	0.529006	1.21174	0.157241	0.386786	0.27361	Elongation factor 1-alpha GN=EF1 OS=Manihot esculenta (Cassava) PE=3 SV=1	PREDICTED: elongation factor 1-alpha-like [Musa acuminata subsp. malaccensis]
	VF22688	2.33535	4.74932	10.1333	2.78724	2.32538	3.1726	Alpha carbonic anhydrase 4 (Precursor) GN=ACA4 OS=Arabidopsis thaliana (Mouse-ear cress) PE=3 SV=1	BnaA06g04550D [Brassica napus]
	VF23000	0.460947	1.64545	17.8265	0.512146	0.532905	0.777541	--	hypothetical protein JCGZ_09652 [Jatropha curcas]
	VF23269	0.0322146	0.283597	1.80174	0.131237	0.858559	0.0302742	Trans-resveratrol di-O-methyltransferase GN=ROMT OS=Vitis vinifera (Grape) PE=1 SV=2	o-methyltransferase, putative [Ricinus communis]
	VF23379	0.200846	0.62749	2.89607	0.209528	0.247605	0.404217	Cysteine-rich receptor-like protein kinase 25 (Precursor) GN=CRK25 OS=Arabidopsis thaliana (Mouse-ear cress) PE=3 SV=1	ATP binding protein, putative [Ricinus communis]
	VF23594	7.68903	11.1065	24.2404	7.99868	8.03658	7.21236	Dof zinc finger protein DOF1.1 GN=F24B9.30 OS=Arabidopsis thaliana (Mouse-ear cress) PE=1 SV=2	hypothetical protein JCGZ_12335 [Jatropha curcas]
	VF23596	16.1498	30.4778	69.3304	11.9856	32.5008	10.2204	L-ascorbate oxidase homolog (Precursor) OS=Nicotiana tabacum (Common tobacco) PE=1 SV=1	hypothetical protein JCGZ_12337 [Jatropha curcas]
	VF23816	0.583526	1.07634	9.22797	0.783617	1.12659	3.76572	Alpha-amylase (Precursor) GN=AMY1.1 OS=Vigna mungo (Black gram) PE=2 SV=1	hypothetical protein POPTR_0515s00220g [Populus trichocarpa]
	VF24030	0.712133	1.88741	6.09753	2.34307	2.55577	2.14686	--	hypothetical protein JCGZ_11808 [Jatropha curcas]
	VF24034	0	0	3.23438	0	0	0	--	conserved hypothetical protein [Ricinus communis]
	VF24126	0.445583	0.493552	1.74218	0.271997	0.107527	0.484877	--	hypothetical protein JCGZ_20503 [Jatropha curcas]
	VF24492	0.33717	0.596985	1.63854	0.128409	0.321465	0.272569	3-ketoacyl-CoA synthase 19 GN=KCS19 OS=Arabidopsis thaliana (Mouse-ear cress) PE=2 SV=1	hypothetical protein JCGZ_02260 [Jatropha curcas]
	VF24537	0.841315	0.374449	1.89111	0.00745574	0.448747	0.530447	--	hypothetical protein JCGZ_02294 [Jatropha curcas]
	VF24801	8.39993	41.998	202.728	13.4908	34.9479	46.6541	Anthocyanidin reductase GN=T13M11.8 OS=Arabidopsis thaliana (Mouse-ear cress) PE=1 SV=2	hypothetical protein JCGZ_21298 [Jatropha curcas]
	VF24828	3.25702e-55	0.815985	1.77517	4.17951e-34	0.644505	1.0609e-45	Dehydration-responsive element-binding protein 3 GN=F15N18.180 OS=Arabidopsis thaliana (Mouse-ear cress) PE=2 SV=1	Transcriptional factor TINY, putative [Ricinus communis]
	VF24903	942.341	1833.51	4698.96	865.551	685.995	538.212	36.4 kDa proline-rich protein GN=TPRP-F1 OS=Solanum lycopersicum (Tomato) PE=2 SV=1	hypothetical protein JCGZ_20802 [Jatropha curcas]
	VF24964	10.1536	44.9309	102.367	6.81449	11.8034	28.0901	Probable pectate lyase 22 (Precursor) GN=At5g63180 OS=Arabidopsis thaliana (Mouse-ear cress) PE=2 SV=1	hypothetical protein JCGZ_11370 [Jatropha curcas]
	VF25032	16.7965	9.2172	35.8806	2.9935	1.31151	8.79041	Cytochrome P450 94B1 GN=CYP94B1 OS=Arabidopsis thaliana (Mouse-ear cress) PE=2 SV=1	cytochrome P450, putative [Ricinus communis]
	VF25150	0.194024	0.766687	1.88631	0.132267	0.311665	0.0713507	Ethylene-responsive transcription factor RAP2-11 GN=T29J13.210 OS=Arabidopsis thaliana (Mouse-ear cress) PE=2 SV=1	conserved hypothetical protein [Ricinus communis]
	VF25818	1.04975	1.98923	5.19538	0.705828	0.694007	1.79565	Cytochrome P450 88A1 GN=CYP88A1 OS=Zea mays (Maize) PE=2 SV=1	hypothetical protein JCGZ_22151 [Jatropha curcas]
	VF26426	0.650293	2.75401	7.99815	0.308531	0.670788	2.65844	--	Protein bem46, putative [Ricinus communis]
	VF26443	0.0522095	1.53371	6.76285	0.213884	0.317895	0.26659	Spermidine hydroxycinnamoyl transferase GN=SHT OS=Arabidopsis thaliana (Mouse-ear cress) PE=1 SV=1	Anthranilate N-benzoyltransferase protein, putative [Ricinus communis]
	VF26444	0.130165	1.32309	13.3471	0.162561	0.500081	0.413621	Spermidine hydroxycinnamoyl transferase GN=SHT OS=Arabidopsis thaliana (Mouse-ear cress) PE=1 SV=1	Anthranilate N-benzoyltransferase protein, putative [Ricinus communis]
	VF26485	0	14.4092	49.0974	10.0533	4.61984	0	Probable non-specific lipid-transfer protein AKCS9 (Precursor) OS=Vigna unguiculata (Cowpea) PE=2 SV=1	Nonspecific lipid-transfer protein, putative [Ricinus communis]
	VF26606	4.22816	53.593	120.64	10.1908	32.9265	53.6618	Probable non-specific lipid-transfer protein AKCS9 (Precursor) OS=Vigna unguiculata (Cowpea) PE=2 SV=1	protease inhibitor/seed storage/lipid transfer family protein [Populus trichocarpa]
	VF26684	0.591975	2.43292	11.5851	0.694579	0.383527	1.26591	Two-component response regulator ARR9 GN=F24I3.120 OS=Arabidopsis thaliana (Mouse-ear cress) PE=1 SV=1	hypothetical protein JCGZ_12106 [Jatropha curcas]
	VF26718	0.360306	0.224469	1.56462	0.346325	0.110338	0.363363	Probable caffeine synthase 2 GN=TCS2 OS=Camellia sinensis (Tea) PE=2 SV=1	Jasmonate O-methyltransferase, putative [Ricinus communis]
	VF26811	3.73449	9.75778	22.4106	3.92209	4.77102	6.62019	--	hypothetical protein JCGZ_02971 [Jatropha curcas]
	VF26935	1.06088	8.06268	21.6358	6.45861	6.62298	1.4914	--	hypothetical protein JCGZ_26182 [Jatropha curcas]
	VF27017	1.56703	2.72463	6.34342	1.23275	2.82965	0.558632	Heavy metal-associated isoprenylated plant protein 26 (Precursor) GN=F20M13.140 OS=Arabidopsis thaliana (Mouse-ear cress) PE=1 SV=1	hypothetical protein JCGZ_26110 [Jatropha curcas]
	VF27025	2.13336	23.6689	57.8413	0.773476	1.34377	1.41922	--	hypothetical protein JCGZ_26104 [Jatropha curcas]
	VF27071	1.74518	1.67668	3.71522	1.56238	1.29624	0.544609	Ferric reduction oxidase 4 GN=FRO4 OS=Arabidopsis thaliana (Mouse-ear cress) PE=2 SV=1	ferric reductase oxidase [Manihot esculenta]
	VF27264	6.6504	19.8841	41.2929	6.20177	6.62073	19.5513	Serine/threonine-protein kinase UCNL {ECO:0000305} OS=Arabidopsis thaliana (Mouse-ear cress) PE=2 SV=1	hypothetical protein JCGZ_25895 [Jatropha curcas]
	VF27519	0.0960135	0.158564	6.17661	0.613007	0.697064	1.47525	Cell number regulator 1 GN=CNR1 OS=Zea mays (Maize) PE=2 SV=1	conserved hypothetical protein [Ricinus communis]
	VF27524	0	1.74693	391.886	0.82731	24.7141	89.3363	Acid phosphatase 1 (Precursor) GN=APS1 OS=Solanum lycopersicum (Tomato) PE=2 SV=1	hypothetical protein PRUPE_ppa010152mg [Prunus persica]
	VF27526	0	0.141348	5.81772	0	0.0426541	0.161525	Acid phosphatase 1 (Precursor) GN=APS1 OS=Solanum lycopersicum (Tomato) PE=2 SV=1	hypothetical protein JCGZ_24844 [Jatropha curcas]
	VF27551	2.03507	2.60335	6.68266	1.03036	1.24581	1.67028	1-aminocyclopropane-1-carboxylate oxidase 5 GN=At1g77330 OS=Arabidopsis thaliana (Mouse-ear cress) PE=2 SV=1	hypothetical protein JCGZ_24866 [Jatropha curcas]
	VF27829	1.14543	0.646545	6.11703	0.840442	0.86932	0.664132	--	peptide transporter, putative [Ricinus communis]
	VF27963	0.20786	0	1.03205	0.300693	0	0.363944	EG45-like domain containing protein (Precursor) GN=CjBAp12 OS=Citrus jambhiri (Rough lemon) PE=1 SV=1	PREDICTED: EG45-like domain containing protein [Vitis vinifera]
	VF27986	0.731812	1.00826	3.57757	0.353555	0.194096	1.55415	Potassium channel AKT6 GN=F3N11.5 OS=Arabidopsis thaliana (Mouse-ear cress) PE=1 SV=2	hypothetical protein JCGZ_07188 [Jatropha curcas]
	VF28034	0.173841	1.05733	4.34404	0.565833	0.627995	0.580718	--	conserved hypothetical protein [Ricinus communis]
	VF28158	0.536405	1.88897	5.41605	0.429121	0.280502	2.05652	--	conserved hypothetical protein [Ricinus communis]
	VFNG1536	1.30167	2.25011	5.83986	1.03208	0.515455	1.23134	Putative ribonuclease H protein At1g65750 GN=At1g65750 OS=Arabidopsis thaliana (Mouse-ear cress) PE=3 SV=1	PREDICTED: putative ribonuclease H protein At1g65750 [Prunus mume]
	VFNG1677	0.300829	0.423635	1.52668	0.473197	0.314958	0.0923915	--	--
	VFNG203	5.74071	9.15993	27.8195	3.57192	3.08038	13.018	Protein EXORDIUM-like 7 (Precursor) GN=EXL7 OS=Arabidopsis thaliana (Mouse-ear cress) PE=2 SV=2	hypothetical protein JCGZ_18105 [Jatropha curcas]
	VFNG2191	13.0489	13.4508	38.822	10.6539	12.0261	15.7623	Actin-depolymerizing factor 9 GN=ADF9 OS=Arabidopsis thaliana (Mouse-ear cress) PE=2 SV=2	hypothetical protein JCGZ_18795 [Jatropha curcas]
	VFNG2653	7.42569	4.9072	17.2357	4.80288	1.70419	5.81176	--	hypothetical protein JCGZ_22412 [Jatropha curcas]
	VFNG2937	0.398357	0.228696	1.03657	0.179868	0.0512951	0.0710164	Probable LRR receptor-like serine/threonine-protein kinase At4g08850 (Precursor) GN=At4g08850 OS=Arabidopsis thaliana (Mouse-ear cress) PE=2 SV=3	hypothetical protein JCGZ_10566 [Jatropha curcas]
	VFNG3399	3.79821	7.10435	19.1732	2.07138	1.9378	2.8579	Ras-related protein Rab7 OS=Glycine max (Soybean) PE=2 SV=1	hypothetical protein JCGZ_09424 [Jatropha curcas]
	VFNG4223	2.04411	2.90751	10.3188	3.79526	4.32827	3.85882	Pyruvate kinase, cytosolic isozyme OS=Nicotiana tabacum (Common tobacco) PE=2 SV=1	hypothetical protein JCGZ_21519 [Jatropha curcas]
	VFNG4574	1.96606	4.67114	10.3014	0.414964	1.25714	3.07581	Protein yippee-like At4g27740 GN=At4g27740 OS=Arabidopsis thaliana (Mouse-ear cress) PE=3 SV=1	hypothetical protein JCGZ_09252 [Jatropha curcas]
	VFNG5063	0.0913532	0.654192	3.21369	0.470558	0.260596	0.790842	UDP-glucose iridoid glucosyltransferase GN=UGT76A2 OS=Catharanthus roseus (Madagascar periwinkle) PE=1 SV=1	PREDICTED: UDP-glycosyltransferase 76E2-like [Populus euphratica]
	VFNG534	0.122688	0.253391	2.61725	0.159287	0.25416	0.835537	Cinnamoyl-CoA reductase 1 GN=T24D18.5 OS=Arabidopsis thaliana (Mouse-ear cress) PE=1 SV=1	hypothetical protein JCGZ_16853 [Jatropha curcas]
	VFNG5379	0.212826	3.22266	19.1067	0.249605	0.322529	0.520034	7-deoxyloganetin glucosyltransferase GN=UGT85A24 OS=Gardenia jasminoides (Cape jasmine) PE=1 SV=1	hypothetical protein JCGZ_15805 [Jatropha curcas]
	VFNG5383	0.00450922	6.48888	17.7047	0.721345	0.779148	1.02382	--	hypothetical protein JCGZ_25740 [Jatropha curcas]
	VFNG601	0.0484576	0.123324	1.03455	0.046517	0.0422002	0.0786447	Uncharacterized mitochondrial protein AtMg00310 GN=AtMg00310 OS=Arabidopsis thaliana (Mouse-ear cress) PE=4 SV=1	PREDICTED: LOW QUALITY PROTEIN: uncharacterized protein LOC103343662 [Prunus mume]
	VFNG6075	2.35932	8.24836	17.0564	2.15542	4.94894	4.78939	Probable serine protease EDA2 (Precursor) GN=EDA2 OS=Arabidopsis thaliana (Mouse-ear cress) PE=2 SV=2	hypothetical protein JCGZ_05403 [Jatropha curcas]
X1-specific	VF28008	9.87866	2.08214	1.54371	24.9745	5.57868	1.34205	Probable sulfate transporter 3.4 GN=SULTR3;4 OS=Arabidopsis thaliana (Mouse-ear cress) PE=2 SV=1	hypothetical protein CISIN_1g005883mg [Citrus sinensis]
	VF27745	8.08721	3.24685	1.67676	18.1455	6.24933	3.50898	Cytochrome P450 86B1 GN=CYP86B1 OS=Arabidopsis thaliana (Mouse-ear cress) PE=2 SV=1	hypothetical protein JCGZ_13644 [Jatropha curcas]
	VF27484	1.0045	2.87556	2.74826	10.0244	3.58116	2.39688	CASP-like protein 5C1 OS=Oryza sativa subsp. japonica (Rice) PE=2 SV=1	conserved hypothetical protein [Ricinus communis]
	VF27299	4.41273	0.679898	1.66755	10.3273	0.661391	0.0353275	G-type lectin S-receptor-like serine/threonine-protein kinase RLK1 (Precursor) GN=RLK1 OS=Arabidopsis thaliana (Mouse-ear cress) PE=2 SV=2	BRASSINOSTEROID INSENSITIVE 1-associated receptor kinase 1 precursor, putative [Ricinus communis]
	VF26988	5.63202	5.51093	1.93114	12.8524	6.42323	0.805943	Leucine-rich repeat receptor protein kinase EXS (Precursor) GN=T28J14.220 OS=Arabidopsis thaliana (Mouse-ear cress) PE=1 SV=1	hypothetical protein JCGZ_26138 [Jatropha curcas]
	VF26981	5.57087	0.821914	0.644315	15.0043	3.29367	1.03828	Putative non-specific lipid-transfer protein 14 (Precursor) GN=LTP14 OS=Arabidopsis thaliana (Mouse-ear cress) PE=3 SV=2	hypothetical protein JCGZ_26144 [Jatropha curcas]
	VF26946	114.008	2.91005	2.17185	259.858	78.479	1.19391	Protein HOTHEAD (Precursor) GN=F3N23.17 OS=Arabidopsis thaliana (Mouse-ear cress) PE=1 SV=1	hypothetical protein JCGZ_26172 [Jatropha curcas]
	VF26694	19.974	20.8098	34.1947	80.0887	30.3497	7.13923	Defensin-like protein (Precursor) OS=Nelumbo nucifera (Sacred lotus) PE=3 SV=1	hypothetical protein JCGZ_12099 [Jatropha curcas]
	VF25873	1213.93	18.8938	11.0748	2669.99	1172.58	7.42846	--	hypothetical protein JCGZ_18475 [Jatropha curcas]
	VF25321	10.8167	2.3644	0	25.2514	1.27967	2.1039	Lignin-forming anionic peroxidase (Precursor) OS=Nicotiana sylvestris (Wood tobacco) PE=2 SV=1	PREDICTED: peroxidase 5-like [Populus euphratica]
	VF25095	27.2047	1.77118	0.720516	134.73	43.6221	0	Bidirectional sugar transporter SWEET12 GN=MQM1.8 OS=Arabidopsis thaliana (Mouse-ear cress) PE=1 SV=1	conserved hypothetical protein [Ricinus communis]
	VF25014	2.35168	0	0.0316276	6.20842	0.298019	0	Uncharacterized protein At1g04910 GN=At1g04910 OS=Arabidopsis thaliana (Mouse-ear cress) PE=2 SV=1	conserved hypothetical protein [Ricinus communis]
	VF24734	67.3919	1.5404	0.856467	145.719	6.16151	0.0918377	Bidirectional sugar transporter SWEET15 GN=T19L5.130 OS=Arabidopsis thaliana (Mouse-ear cress) PE=2 SV=1	hypothetical protein JCGZ_18015 [Jatropha curcas]
	VF24631	14.0304	7.22944	6.32477	43.223	13.1735	13.1527	--	hypothetical protein JCGZ_17917 [Jatropha curcas]
	VF24538	22.3346	27.6572	26.9198	73.3301	29.8169	32.9664	Uncharacterized protein At4g14450, chloroplastic (Precursor) GN=At4g14450 OS=Arabidopsis thaliana (Mouse-ear cress) PE=2 SV=1	hypothetical protein JCGZ_02295 [Jatropha curcas]
	VF24281	611.468	9.83374	4.55312	1258.85	247.849	63.4775	Cytochrome P450 704B1 GN=CYP704B1 OS=Arabidopsis thaliana (Mouse-ear cress) PE=2 SV=1	hypothetical protein JCGZ_15633 [Jatropha curcas]
	VF24130	3.24061	2.66267	2.45963	10.0015	3.09677	3.20777	--	hypothetical protein JCGZ_23947 [Jatropha curcas]
	VF24103	11.264	0.383208	0.250816	24.969	3.86693	7.09647	Phenylalanine ammonia-lyase GN=PAL OS=Camellia sinensis (Tea) PE=2 SV=1	Phenylalanine ammonia-lyase, putative [Ricinus communis]
	VF23823	41.6364	28.3842	20.8306	85.4537	26.1822	26.2856	LanC-like protein GCL1 GN=GCL1 OS=Arabidopsis thaliana (Mouse-ear cress) PE=2 SV=1	hypothetical protein JCGZ_18659 [Jatropha curcas]
	VF23715	4.19692	0.709978	0.381663	47.0805	12.2325	0.060985	LOB domain-containing protein 2 GN=F9P14.14 OS=Arabidopsis thaliana (Mouse-ear cress) PE=2 SV=2	LOB, putative [Ricinus communis]
	VF22625	1.25501	0.234213	0.0507162	3.48728	0.363823	0.0868459	GDSL esterase/lipase At5g08460 (Precursor) GN=At5g08460 OS=Arabidopsis thaliana (Mouse-ear cress) PE=2 SV=1	zinc finger protein, putative [Ricinus communis]
	VF22474	8.54111	5.38227	6.96009	17.7892	4.13458	3.37761	Cell division control protein 2 homolog A GN=CDC2A OS=Antirrhinum majus (Garden snapdragon) PE=2 SV=2	PREDICTED: cell division control protein 2 homolog A isoform X1 [Musa acuminata subsp. malaccensis]
	VF22245	1.3391	0	0	9.12897	3.31353	4.46753	--	hypothetical protein POPTR_0012s08710g [Populus trichocarpa]
	VF21440	6.57614	13.3827	14.3562	28.8837	6.07793	9.38962	Sugar transport protein 13 GN=F9D12.17 OS=Arabidopsis thaliana (Mouse-ear cress) PE=1 SV=2	hypothetical protein JCGZ_02153 [Jatropha curcas]
	VF21309	3.62424	15.3275	9.76966	35.3408	14.5694	10.394	--	conserved hypothetical protein [Ricinus communis]
	VF20299	1.03148	0.0421473	0.0250742	4.78739	2.23247	0.2003	U-box domain-containing protein 13 GN=PUB13 OS=Arabidopsis thaliana (Mouse-ear cress) PE=1 SV=1	PREDICTED: U-box domain-containing protein 13 [Sesamum indicum]
	VF20189	68.0356	67.2506	62.3803	264.874	92.0786	74.9529	Uncharacterized protein At4g22758 GN=At4g22758 OS=Arabidopsis thaliana (Mouse-ear cress) PE=2 SV=1	hypothetical protein JCGZ_04721 [Jatropha curcas]
	VF19936	186.215	16.2018	15.4243	483.086	90.2162	11.0848	--	hypothetical protein JCGZ_10401 [Jatropha curcas]
	VF19462	9.997	4.01994	1.87291	31.5579	8.45681	11.7207	--	hypothetical protein JCGZ_21939 [Jatropha curcas]
	VF19062	404.79	33.4787	9.50389	1004.96	247.468	9.25606	Transcription factor PRE6 GN=T2P11 OS=Arabidopsis thaliana (Mouse-ear cress) PE=1 SV=1	hypothetical protein JCGZ_15576 [Jatropha curcas]
	VF18867	9.72396	2.22578	0.503951	47.4155	14.266	0.328213	Cysteine proteinase inhibitor 10 (Precursor) GN=OSJNBa0038P21.11 OS=Oryza sativa subsp. japonica (Rice) PE=2 SV=1	hypothetical protein JCGZ_13126 [Jatropha curcas]
	VF18629	23.5214	2.86929	2.80317	361.109	135.617	2.73307	--	hypothetical protein JCGZ_17011 [Jatropha curcas]
	VF18386	2.54714	0	0.135607	5.13554	0.405745	0.09177	--	hypothetical protein JCGZ_18877 [Jatropha curcas]
	VF18084	2.05646	1.21564	0	13.2122	4.49709	0.396848	--	hypothetical protein JCGZ_20868 [Jatropha curcas]
	VF18065	5.66527	0	0	12.2673	1.62031	0	Surfeit locus protein 1 GN=MEB5.13 OS=Arabidopsis thaliana (Mouse-ear cress) PE=2 SV=1	surfeit locus protein, putative [Ricinus communis]
	VF18007	83.4113	6.03433	2.70063	595.024	48.9009	0.714816	--	hypothetical protein JCGZ_16050 [Jatropha curcas]
	VF17247	32.4488	1.6277	0.587651	171.16	21.0682	42.3643	--	PREDICTED: uncharacterized protein LOC105121398 [Populus euphratica]
	VF17205	1.13138	0.983776	0.251339	3.74934	1.15916	0	Zinc finger A20 and AN1 domain-containing stress-associated protein 1 GN=SAP1 OS=Arabidopsis thaliana (Mouse-ear cress) PE=1 SV=1	hypothetical protein JCGZ_26211 [Jatropha curcas]
	VF17203	26.8067	0.612305	0.271527	58.307	5.43274	0.212813	--	hypothetical protein JCGZ_26210 [Jatropha curcas]
	VF17117	10.185	7.70019	12.0971	27.2479	8.3095	10.7119	U-box domain-containing protein 31 GN=PUB31 OS=Arabidopsis thaliana (Mouse-ear cress) PE=2 SV=1	hypothetical protein JCGZ_16003 [Jatropha curcas]
	VF16537	30.3417	1.42227	1.9049	63.8851	10.1621	1.53092	--	hypothetical protein POPTR_0007s14730g [Populus trichocarpa]
	VF16268	4.7811	1.51969	1.93146	9.76337	3.82806	1.46354	Pyruvate kinase, cytosolic isozyme OS=Nicotiana tabacum (Common tobacco) PE=2 SV=1	hypothetical protein JCGZ_06860 [Jatropha curcas]
	VF15948	9.52093	0.887838	1.2955	20.2562	2.79478	3.91201	3-oxo-Delta(4,5)-steroid 5-beta-reductase GN=T22A6.50 OS=Arabidopsis thaliana (Mouse-ear cress) PE=1 SV=1	PREDICTED: 3-oxo-Delta(4,5)-steroid 5-beta-reductase-like, partial [Camelina sativa]
	VF15778	18.8538	17.3877	16.8435	39.1969	17.5917	16.0772	Probable E3 ubiquitin-protein ligase XBOS35 OS=Oryza sativa subsp. japonica (Rice) PE=2 SV=1	hypothetical protein JCGZ_01218 [Jatropha curcas]
	VF15597	2.89683	0.237023	0.32084	7.74407	1.51836	0.239054	Disease resistance protein RPS2 GN=RPS2 OS=Arabidopsis thaliana (Mouse-ear cress) PE=1 SV=1	hypothetical protein JCGZ_07436 [Jatropha curcas]
	VF15273	1.46765	0.105565	0	3.38823	0.688375	0.700663	--	hypothetical protein JCGZ_18691 [Jatropha curcas]
	VF14941	1.97351	0	0	5.01271	1.46555	0	NAC transcription factor ONAC010 GN=ONAC010 OS=Oryza sativa subsp. indica (Rice) PE=3 SV=1	NAC transcription factor 078 [Jatropha curcas]
	VF14656	6.13938	3.00149	4.0485	18.2278	4.52649	4.95749	Fasciclin-like arabinogalactan protein 19 (Precursor) GN=FLA19 OS=Arabidopsis thaliana (Mouse-ear cress) PE=2 SV=2	hypothetical protein JCGZ_09466 [Jatropha curcas]
	VF14584	970.15	13.5386	9.71267	2215.48	243.771	1.55972	--	hypothetical protein JCGZ_16722 [Jatropha curcas]
	VF14275	51.4304	5.20691	4.67843	112.53	25.6707	2.82779	Putative F-box protein At1g50870 GN=At1g50870 OS=Arabidopsis thaliana (Mouse-ear cress) PE=4 SV=1	hypothetical protein JCGZ_20412 [Jatropha curcas]
	VF13680	1.81579	0.927447	0.198777	4.62841	1.6157	0.0801681	Lissencephaly-1 homolog {ECO:0000255|HAMAP-Rule:MF_03141} GN=PHATRDRAFT_17300 OS=Phaeodactylum tricornutum (strain CCAP 1055/1) PE=3 SV=1	hypothetical protein JCGZ_17862 [Jatropha curcas]
	VF13492	2.50039	0.0446237	0.0716782	5.9186	0.472616	0.126311	GDSL esterase/lipase At1g71691 (Precursor) GN=At1g71691 OS=Arabidopsis thaliana (Mouse-ear cress) PE=2 SV=1	hypothetical protein JCGZ_20439 [Jatropha curcas]
	VF13456	18.4762	18.8835	26.5012	112.145	32.1229	36.8428	--	hypothetical protein JCGZ_20492 [Jatropha curcas]
	VF12177	1.00401	0.589876	0.534846	2.16441	1.03229	0.515685	Protein argonaute 2 GN=AGO2 OS=Arabidopsis thaliana (Mouse-ear cress) PE=1 SV=1	hypothetical protein JCGZ_00220 [Jatropha curcas]
	VF11923	1.24889	0.0427445	0.0284377	3.43903	1.54673	0.15299	--	hypothetical protein JCGZ_07160 [Jatropha curcas]
	VF11697	274.345	56.1202	60.8475	569.494	60.1612	64.6109	Glucan endo-1,3-beta-D-glucosidase (Precursor) GN=OLE9 OS=Olea europaea (Common olive) PE=1 SV=1	hypothetical protein JCGZ_14094 [Jatropha curcas]
	VF11593	67.9221	0	0.36298	141.326	28.2828	0.91462	--	hypothetical protein JCGZ_14191 [Jatropha curcas]
	VF11547	1.39953	0.199963	0.101482	4.61505	1.10294	0	Zinc finger protein ZAT10 GN=T22C5.18 OS=Arabidopsis thaliana (Mouse-ear cress) PE=2 SV=1	hypothetical protein JCGZ_09528 [Jatropha curcas]
	VF11277	12.3772	5.30484	5.24525	29.3351	6.14944	1.27103	Homeobox-leucine zipper protein HAT3 GN=HAT3 OS=Arabidopsis thaliana (Mouse-ear cress) PE=2 SV=2	hypothetical protein JCGZ_14602 [Jatropha curcas]
	VF10911	12.7561	8.27474	10.3582	25.7815	11.4426	9.8222	--	hypothetical protein JCGZ_15104 [Jatropha curcas]
	VF10418	2.25868	0.740451	0.574006	7.45602	1.80203	3.41034	Cytochrome P450 98A2 GN=CYP98A2 OS=Glycine max (Soybean) PE=2 SV=1	hypothetical protein JCGZ_10726 [Jatropha curcas]
	VF10168	4.3198	0.177607	1.00551	8.66845	0.565401	1.48181	Uncharacterized protein At4g22758 GN=At4g22758 OS=Arabidopsis thaliana (Mouse-ear cress) PE=2 SV=1	conserved hypothetical protein [Ricinus communis]
	VF10161	2.81115	0	0.290996	6.94212	2.92355	1.1505	Germin-like protein subfamily 1 member 7 (Precursor) GN=At3g05950 OS=Arabidopsis thaliana (Mouse-ear cress) PE=2 SV=1	hypothetical protein JCGZ_23602 [Jatropha curcas]
	VF10037	2.30773	0.311984	0.92221	8.26664	1.76853	0.669809	Putative DNA-binding protein ESCAROLA GN=ESC OS=Arabidopsis thaliana (Mouse-ear cress) PE=2 SV=1	hypothetical protein JCGZ_14511 [Jatropha curcas]
	VF09930	37.7668	4.68454	2.9695	76.723	30.9315	13.1577	Protein TIFY 9 GN=T31B5.40 OS=Arabidopsis thaliana (Mouse-ear cress) PE=1 SV=1	JAZ10 [Hevea brasiliensis]
	VF09347	5.45755	0.452996	0.162505	24.8379	8.08898	5.74513	--	enzyme inhibitor, putative [Ricinus communis]
	VF09314	11.0173	6.44872	6.63157	63.5066	28.6538	11.7421	Putative pentatricopeptide repeat-containing protein At3g16890, mitochondrial (Precursor) GN=PPR40 OS=Arabidopsis thaliana (Mouse-ear cress) PE=3 SV=1	hypothetical protein JCGZ_18966 [Jatropha curcas]
	VF09137	137.552	3.36208	0.849573	284.168	57.266	4.94677	Omega-hydroxypalmitate O-feruloyl transferase GN=MEE6.11 OS=Arabidopsis thaliana (Mouse-ear cress) PE=1 SV=1	Taxadien-5-alpha-ol O-acetyltransferase, putative [Ricinus communis]
	VF08212	5.98259	5.88961	4.71589	15.5307	4.16333	2.85842	ATP-dependent zinc metalloprotease FTSH 6, chloroplastic (Precursor) GN=FTSH6 OS=Arabidopsis thaliana (Mouse-ear cress) PE=2 SV=1	Cell division protein ftsH, putative [Ricinus communis]
	VF07706	5.1938	0.556762	0.559539	17.3282	2.24688	0.399671	Serine/threonine-protein kinase-like protein At5g23170 GN=At5g23170 OS=Arabidopsis thaliana (Mouse-ear cress) PE=2 SV=1	hypothetical protein JCGZ_00210 [Jatropha curcas]
	VF07391	8.77393	1.89608	3.63187	37.9376	4.60466	0.971523	Protein TRM32 GN=TRM32 OS=Arabidopsis thaliana (Mouse-ear cress) PE=2 SV=1	hypothetical protein JCGZ_05700 [Jatropha curcas]
	VF07106	92.4825	2.51478	1.23526	216.611	20.9652	1.26904	Protein MOTHER of FT and TF 1 OS=Arabidopsis thaliana (Mouse-ear cress) PE=1 SV=1	hypothetical protein JCGZ_21343 [Jatropha curcas]
	VF07091	2.01563	0.746865	1.05565	6.95185	1.8922	1.23281	--	hypothetical protein JCGZ_23106 [Jatropha curcas]
	VF06737	1.32867	0.979796	0	2.84525	0.677153	0.368951	11S globulin seed storage protein 2 basic chain (Precursor) OS=Sesamum indicum (Oriental sesame) PE=2 SV=1	JHL25P11.12 [Jatropha curcas]
	VF06361	1.6116	0.155314	0.0113508	12.9846	2.47389	2.45479	Cation/H(+) antiporter 15 GN=CHX15 OS=Arabidopsis thaliana (Mouse-ear cress) PE=2 SV=1	hypothetical protein JCGZ_03679 [Jatropha curcas]
	VF05821	5.5364	1.79091	1.26384	22.272	4.12705	4.3907	E3 ubiquitin-protein ligase At4g11680 GN=At4g11680 OS=Arabidopsis thaliana (Mouse-ear cress) PE=2 SV=1	hypothetical protein JCGZ_01079 [Jatropha curcas]
	VF05506	5.37592	4.34876	3.84149	15.6681	6.89232	3.28706	Alcohol dehydrogenase-like 2 GN=At1g22440 OS=Arabidopsis thaliana (Mouse-ear cress) PE=2 SV=1	alpha-hydroxynitrile lyase family protein [Populus trichocarpa]
	VF05491	1.00264	0	0	4.25483	0.244171	0.340941	--	hypothetical protein JCGZ_16167 [Jatropha curcas]
	VF05224	97.7054	1.72394	0.703283	216.202	27.7756	0.0349297	Myb-related protein Zm38 OS=Zea mays (Maize) PE=2 SV=1	hypothetical protein JCGZ_11556 [Jatropha curcas]
	VF05046	1.54171	0.692765	0	7.45282	0.4113	0	Protein STRICTOSIDINE SYNTHASE-LIKE 12 {ECO:0000303|PubMed:10777701} (Precursor) OS=Arabidopsis thaliana (Mouse-ear cress) PE=2 SV=2	JHL10I11.5 [Jatropha curcas]
	VF04801	6.28875	2.01856	0	13.5974	0	0	E3 ubiquitin-protein ligase XBAT32 GN=XBAT32 OS=Arabidopsis thaliana (Mouse-ear cress) PE=1 SV=1	hypothetical protein PRUPE_ppa004480mg [Prunus persica]
	VF04259	41.2423	1.49515	0.320455	128.652	27.5698	0.598066	Auxin-responsive protein IAA33 GN=IAA33 OS=Arabidopsis thaliana (Mouse-ear cress) PE=2 SV=1	PREDICTED: auxin-responsive protein IAA33-like [Citrus sinensis]
	VF03583	6.17407	5.2317	4.31487	16.5608	7.44713	8.27316	--	PREDICTED: uncharacterized protein LOC104880295 [Vitis vinifera]
	VF02780	2.50119	1.99357	1.40792	5.10026	1.4308	0.519741	Putative fasciclin-like arabinogalactan protein 20 GN=FLA20 OS=Arabidopsis thaliana (Mouse-ear cress) PE=3 SV=1	hypothetical protein JCGZ_04676 [Jatropha curcas]
	VF02253	1.52279	1.39402	1.8889	17.7983	3.99538	0.867455	--	hypothetical protein JCGZ_03379 [Jatropha curcas]
	VF02053	66.4747	8.86414	2.38547	133.384	43.4599	0.119551	Cytochrome P450 78A7 GN=CYP78A7 OS=Arabidopsis thaliana (Mouse-ear cress) PE=2 SV=1	hypothetical protein JCGZ_09401 [Jatropha curcas]
	VF01995	3.05183	0.770434	0.237652	15.3186	4.79118	0.30639	Respiratory burst oxidase homolog protein F GN=F22C12.18 OS=Arabidopsis thaliana (Mouse-ear cress) PE=1 SV=1	hypothetical protein JCGZ_22480 [Jatropha curcas]
	VF01731	2.39384	2.02233	0.361494	4.99838	1.17574	1.37474	Cytochrome P450 94C1 GN=CYP94C1 OS=Arabidopsis thaliana (Mouse-ear cress) PE=2 SV=1	cytochrome P450, putative [Ricinus communis]
	VF01685	10.4774	10.6485	3.6275	21.697	7.90311	2.48797	--	hypothetical protein JCGZ_12700 [Jatropha curcas]
	VF01384	1.26277	0.839794	0.490841	36.1042	4.898	14.2136	AP2-like ethylene-responsive transcription factor At1g16060 GN=At1g16060 OS=Arabidopsis thaliana (Mouse-ear cress) PE=2 SV=1	AP2 domain-containing transcription factor, putative [Theobroma cacao]
	VF01315	76.0764	52.28	43.343	184.104	82.3522	60.7236	--	hypothetical protein AMTR_s00177p00045340 [Amborella trichopoda]
	VF01118	1.48563	1.42654	0.601722	3.47236	0.780485	0.692257	Salicylic acid-binding protein 2 GN=SABP2 OS=Nicotiana tabacum (Common tobacco) PE=1 SV=1	hypothetical protein JCGZ_04891 [Jatropha curcas]
	VF00523	6.90298	2.97527	3.20204	14.5082	5.43638	3.06099	Probable protein phosphatase 2C 63 GN=At4g33920 OS=Arabidopsis thaliana (Mouse-ear cress) PE=2 SV=1	hypothetical protein JCGZ_12500 [Jatropha curcas]
	VFNG967	1.05953	0.358541	0.168044	4.97687	0.554892	0.051835	--	chitinase, putative [Ricinus communis]
	VFNG6329	20.747	0.649868	0.871675	70.5798	8.67328	0.432646	Putative DNA-binding protein ESCAROLA GN=ESC OS=Arabidopsis thaliana (Mouse-ear cress) PE=2 SV=1	hypothetical protein JCGZ_20733 [Jatropha curcas]
	VFNG4671	11.915	0.454064	0.296499	40.4152	9.21991	0.0703455	Probable LRR receptor-like serine/threonine-protein kinase At1g56130 (Precursor) GN=At1g56130 OS=Arabidopsis thaliana (Mouse-ear cress) PE=2 SV=2	hypothetical protein JCGZ_25360 [Jatropha curcas]
	VFNG4337	1.20616	0	0.0354358	3.37356	0.472007	0	--	hypothetical protein JCGZ_21524 [Jatropha curcas]
	VFNG4167	2.6578	0.826525	0.342951	8.74083	1.69222	1.94938	Cytochrome P450 98A2 GN=CYP98A2 OS=Glycine max (Soybean) PE=2 SV=1	hypothetical protein JCGZ_10726 [Jatropha curcas]
	VFNG301	2.88142	2.55602	1.85615	6.16498	1.47114	1.2807	Equilibrative nucleotide transporter 3 OS=Arabidopsis thaliana (Mouse-ear cress) PE=1 SV=1	hypothetical protein JCGZ_25862 [Jatropha curcas]
	VFNG1736	2.13368	0.268421	0.157911	23.3068	10.0133	0.145122	Pectinesterase (Precursor) OS=Ficus pumila var. awkeotsang (Jelly fig) PE=1 SV=1	hypothetical protein JCGZ_21257 [Jatropha curcas]
X2-specific	VF28129	0.472689	0.167317	0.20015	0.723422	65.0337	5.15773	Calcium-dependent protein kinase 1 GN=MUK11.19 OS=Arabidopsis thaliana (Mouse-ear cress) PE=1 SV=1	calcium-dependent protein kinase, putative [Ricinus communis]
	VF28037	2.49923	3.10794	1.11111	3.32246	80.9434	31.8546	Polyol transporter 5 GN=PLT5 OS=Arabidopsis thaliana (Mouse-ear cress) PE=1 SV=2	sugar transporter, putative [Ricinus communis]
	VF28014	7.31535	10.6067	7.79339	7.35464	771.282	23.8352	Aldehyde dehydrogenase family 2 member C4 GN=MOB24.3 OS=Arabidopsis thaliana (Mouse-ear cress) PE=1 SV=2	aldehyde dehydrogenase, putative [Ricinus communis]
	VF27548	0.266271	0.142662	0.227402	0.598203	57.2754	1.10149	Pleiotropic drug resistance protein 12 OS=Oryza sativa subsp. japonica (Rice) PE=2 SV=1	hypothetical protein JCGZ_24863 [Jatropha curcas]
	VF27191	0	0	0	0	1.33018	0	--	hypothetical protein JCGZ_20055 [Jatropha curcas]
	VF27114	20.2793	21.8075	22.6907	24.9586	80.0239	18.9924	Katanin p60 ATPase-containing subunit A1 {ECO:0000255|HAMAP-Rule:MF_03023} GN=At1g80350 OS=Arabidopsis thaliana (Mouse-ear cress) PE=1 SV=1	ATP binding protein, putative [Ricinus communis]
	VF27079	0.136333	0.0397897	0.108199	0.198436	29.2239	6.90799	Probable polygalacturonase OS=Vitis vinifera (Grape) PE=1 SV=1	hypothetical protein JCGZ_26058 [Jatropha curcas]
	VF26996	28.0656	23.0701	23.3776	33.5149	71.8587	18.2925	Methyl-CpG-binding domain-containing protein 13 GN=MBD13 OS=Arabidopsis thaliana (Mouse-ear cress) PE=2 SV=1	conserved hypothetical protein [Ricinus communis]
	VF26959	0.383072	1.42181	0.398998	0.624972	5.77224	1.6039	Ethylene-responsive transcription factor ERF025 GN=ERF025 OS=Arabidopsis thaliana (Mouse-ear cress) PE=2 SV=1	hypothetical protein JCGZ_26160 [Jatropha curcas]
	VF26933	2.73044	6.45645	6.4253	3.42047	31.3811	1.76598	Gibberellin 20 oxidase 1 GN=At4g25420 OS=Arabidopsis thaliana (Mouse-ear cress) PE=2 SV=2	gibberellin 20-oxidase, putative [Ricinus communis]
	VF26713	0.723406	1.27163	0.893748	1.56179	4.30765	0.645105	S-norcoclaurine synthase 1 GN=NCS1 OS=Coptis japonica (Japanese goldthread) PE=1 SV=1	oxidoreductase family protein [Populus trichocarpa]
	VF26665	0.294556	1.95262e-17	0.0285671	0.216177	1.22036	0.100953	ABC transporter B family member 15 GN=MZF16.16 OS=Arabidopsis thaliana (Mouse-ear cress) PE=3 SV=1	PREDICTED: ABC transporter B family member 15-like [Populus euphratica]
	VF26502	18.644	19.131	13.5801	27.6583	79.0452	22.1842	--	hypothetical protein JCGZ_18367 [Jatropha curcas]
	VF26389	0.898834	0.362108	0.454577	3.55427	15.609	3.54558	--	hypothetical protein JCGZ_11765 [Jatropha curcas]
	VF26381	0	0	0	0.0803305	1.00183	0	Cytochrome P450 CYP736A12 OS=Panax ginseng (Korean ginseng) PE=2 SV=1	flavonoid 3-hydroxylase, putative [Ricinus communis]
	VF26367	159.383	202.804	207.163	182.964	478.417	172.57	Alpha-1,4-glucan-protein synthase [UDP-forming] 2 GN=UPTG2 OS=Solanum tuberosum (Potato) PE=1 SV=1	hypothetical protein JCGZ_11751 [Jatropha curcas]
	VF26298	0	0	0	0	3.50854	0	CLE12p (Precursor) GN=CLE12 OS=Arabidopsis thaliana (Mouse-ear cress) PE=2 SV=1	hypothetical protein CARUB_v10021664mg [Capsella rubella]
	VF26254	0.883107	1.08417	0.997637	1.36834	13.1917	3.68702	Probable protein kinase At2g41970 GN=At2g41970 OS=Arabidopsis thaliana (Mouse-ear cress) PE=2 SV=1	Serine/threonine-protein kinase PBS1, putative [Ricinus communis]
	VF25964	0.0897195	0.980399	0.174608	3.17755	41.7418	0	Protein EXORDIUM-like 2 (Precursor) GN=EXL2 OS=Arabidopsis thaliana (Mouse-ear cress) PE=2 SV=1	hypothetical protein JCGZ_13974 [Jatropha curcas]
	VF25923	0.505335	1.4256	0.405658	0.693433	36.8361	1.04922	Aromatic-L-amino-acid decarboxylase GN=TDC OS=Catharanthus roseus (Madagascar periwinkle) PE=2 SV=1	hypothetical protein JCGZ_05111 [Jatropha curcas]
	VF25670	0	0.166321	0.0493607	0.0777399	19.7704	3.67782	Probable ADP-ribosylation factor GTPase-activating protein AGD15 GN=AGD15 OS=Arabidopsis thaliana (Mouse-ear cress) PE=2 SV=1	PREDICTED: probable ADP-ribosylation factor GTPase-activating protein AGD15 [Populus euphratica]
	VF25654	35.743	48.2546	17.5135	10.1375	113.335	26.0289	--	hypothetical protein POPTR_0013s06280g [Populus trichocarpa]
	VF25613	3.1499	0.974152	0.637725	9.72727	146.787	2.17725	Beta-amyrin synthase GN=OSCBPY OS=Betula platyphylla (Asian white birch) PE=1 SV=1	beta-amyrin synthase [Euphorbia tirucalli]
	VF25537	9.08158	7.96934	6.23889	12.9349	115.371	40.4711	--	hypothetical protein JCGZ_26482 [Jatropha curcas]
	VF25482	42.0831	62.4908	75.9209	54.1335	167.777	69.4469	Pectinesterase 51 (Precursor) GN=F17I14.50 OS=Arabidopsis thaliana (Mouse-ear cress) PE=2 SV=1	hypothetical protein JCGZ_25411 [Jatropha curcas]
	VF25431	11.3311	16.5747	11.432	11.2171	47.3084	18.2703	Ferredoxin OS=Bumilleriopsis filiformis (Yellow-green alga) PE=1 SV=1	hypothetical protein JCGZ_16944 [Jatropha curcas]
	VF25176	0.111726	8.22022e-17	0.752754	0.233472	2.31719	0.0262138	--	hypothetical protein JCGZ_19907 [Jatropha curcas]
	VF25076	8.11337	13.5868	4.19076	6.44105	30.5982	10.1974	11-beta-hydroxysteroid dehydrogenase 1B GN=HSD1 OS=Arabidopsis thaliana (Mouse-ear cress) PE=1 SV=1	Corticosteroid 11-beta-dehydrogenase, putative [Ricinus communis]
	VF25024	128.417	103.335	112.993	83.0705	418.674	77.9564	Trihelix transcription factor GT-3b GN=F16M14.18 OS=Arabidopsis thaliana (Mouse-ear cress) PE=1 SV=1	hypothetical protein JCGZ_11312 [Jatropha curcas]
	VF24784	1.1403	2.62574	1.04748	128.114	274.692	0.098214	Ornithine decarboxylase OS=Datura stramonium (Jimsonweed) PE=2 SV=1	hypothetical protein JCGZ_18053 [Jatropha curcas]
	VF24783	0.027108	0.501559	0	0.365314	3.17896	1.1788	Ornithine decarboxylase OS=Datura stramonium (Jimsonweed) PE=2 SV=1	hypothetical protein JCGZ_18054 [Jatropha curcas]
	VF24774	95.5444	109.373	112.565	105.332	926.107	129.377	--	hypothetical protein JCGZ_18046 [Jatropha curcas]
	VF24771	10.7409	0.502327	0.432113	20.4538	129.113	3.37591	Thaumatin-like protein (Precursor) GN=At1g18250 OS=Arabidopsis thaliana (Mouse-ear cress) PE=2 SV=2	Zeamatin precursor, putative [Ricinus communis]
	VF24657	0.451875	0.146299	0.107702	0.274668	1.6846	0.0142729	--	hypothetical protein JCGZ_11074 [Jatropha curcas]
	VF24479	0.0878663	0.152234	1.62707	0.730919	173.494	69.9351	--	hypothetical protein JCGZ_00010 [Jatropha curcas]
	VF24440	22.3513	22.0887	21.7676	17.7001	73.5765	24.3555	Protein RDM1 GN=RDM1 OS=Arabidopsis thaliana (Mouse-ear cress) PE=1 SV=1	hypothetical protein JCGZ_02210 [Jatropha curcas]
	VF24432	1.29279	1.63596	2.23196	2.18239	165.578	6.88632	Sugar transport protein 14 GN=STP14 OS=Arabidopsis thaliana (Mouse-ear cress) PE=2 SV=2	hypothetical protein JCGZ_02202 [Jatropha curcas]
	VF24218	0.910751	0.562338	1.86581	0.730447	83.1581	3.32236	Short-chain dehydrogenase TIC 32, chloroplastic GN=TIC32 OS=Arabidopsis thaliana (Mouse-ear cress) PE=2 SV=1	hypothetical protein JCGZ_20579 [Jatropha curcas]
	VF24149	13.6898	1.89642	2.1429	17.3379	176.1	14.995	Katanin p60 ATPase-containing subunit A1 {ECO:0000255|HAMAP-Rule:MF_03023} GN=At1g80350 OS=Arabidopsis thaliana (Mouse-ear cress) PE=1 SV=1	hypothetical protein JCGZ_20518 [Jatropha curcas]
	VF23946	0.0084349	0.0191656	0.18598	0.0594599	20.4209	0.561555	Transcription factor GAMYB OS=Oryza sativa subsp. japonica (Rice) PE=2 SV=1	r2r3-myb transcription factor, putative [Ricinus communis]
	VF23895	9.25628	0.597	0.277348	40.3976	171.167	79.0262	--	hypothetical protein JCGZ_03651 [Jatropha curcas]
	VF23695	0.348908	0.233085	0.188038	0.404355	1.97811	0.64273	Protein trichome birefringence-like 1 GN=TBL1 OS=Arabidopsis thaliana (Mouse-ear cress) PE=2 SV=1	hypothetical protein JCGZ_12245 [Jatropha curcas]
	VF23607	2.33341	6.05116	10.4382	1.72162	52.0783	7.90936	Salicylic acid-binding protein 2 GN=SABP2 OS=Nicotiana tabacum (Common tobacco) PE=1 SV=1	hypothetical protein JCGZ_12329 [Jatropha curcas]
	VF23605	1.26574	0.66306	0.410758	0.43621	67.4098	1.87683	Methylesterase 10 GN=MES10 OS=Arabidopsis thaliana (Mouse-ear cress) PE=2 SV=1	PREDICTED: methylesterase 10-like [Vitis vinifera]
	VF23595	0	0	0	0.110384	2.10431	0	L-ascorbate oxidase homolog (Precursor) GN=Bp10 OS=Brassica napus (Rape) PE=2 SV=1	multicopper oxidase, putative [Ricinus communis]
	VF23466	0.0871339	0	0.085528	0	1.6071	0.150917	Transcription repressor OFP8 GN=OFP8 OS=Arabidopsis thaliana (Mouse-ear cress) PE=2 SV=1	hypothetical protein JCGZ_10854 [Jatropha curcas]
	VF23346	0	0.0382532	0.512719	0	1.36968	0.597746	Probable mediator of RNA polymerase II transcription subunit 26c GN=MYH9.6 OS=Arabidopsis thaliana (Mouse-ear cress) PE=1 SV=1	conserved hypothetical protein [Ricinus communis]
	VF23141	0.567713	0.111274	0.130719	0.609479	2.28795	0.270026	Putative Myb family transcription factor At1g14600 GN=At1g14600 OS=Arabidopsis thaliana (Mouse-ear cress) PE=2 SV=2	hypothetical protein JCGZ_21203 [Jatropha curcas]
	VF23075	0.0218653	0.29787	1.09886	0.125471	283.853	16.7419	Xyloglucan endotransglucosylase/hydrolase protein 2 (Precursor) GN=XTH2 OS=Arabidopsis thaliana (Mouse-ear cress) PE=2 SV=1	hypothetical protein JCGZ_01114 [Jatropha curcas]
	VF23067	27.0113	13.0823	19.7584	33.5433	70.8725	21.5554	Plasma membrane ATPase 1 GN=PMA1 OS=Nicotiana plumbaginifolia (Leadwort-leaved tobacco) PE=2 SV=1	hypothetical protein JCGZ_09715 [Jatropha curcas]
	VF23052	24.9846	37.322	45.3814	23.5447	221.125	47.5844	--	hypothetical protein JCGZ_09705 [Jatropha curcas]
	VF22649	0	0	0	0	1.02378	0	Serine/threonine-protein kinase CTR1 GN=CTR1 OS=Arabidopsis thaliana (Mouse-ear cress) PE=1 SV=1	hypothetical protein JCGZ_15900 [Jatropha curcas]
	VF22615	29.0619	4.29738	5.40589	48.5287	194.146	86.6832	Metal tolerance protein B GN=F16P2.21 OS=Arabidopsis thaliana (Mouse-ear cress) PE=2 SV=1	hypothetical protein JCGZ_02925 [Jatropha curcas]
	VF22472	44.6034	31.221	28.2999	39.8668	91.1792	37.3555	--	30S ribosomal protein S6B [Hevea brasiliensis]
	VF22446	0	0	0	0	1.59631	0	Uncharacterized protein At2g29880 GN=At2g29880 OS=Arabidopsis thaliana (Mouse-ear cress) PE=2 SV=1	conserved hypothetical protein [Ricinus communis]
	VF22257	11.3005	9.91451	11.5347	13.7427	47.3165	19.5742	Probable potassium transporter 17 OS=Oryza sativa subsp. japonica (Rice) PE=2 SV=2	hypothetical protein JCGZ_04837 [Jatropha curcas]
	VF22133	1.00816	0.858302	1.22511	11.3975	29.1432	5.95228	--	hypothetical protein JCGZ_01234 [Jatropha curcas]
	VF22110	0	0.430264	0.0141008	0.840429	5.1049	0	Myb-related protein Myb4 GN=OSJNBa0073E02.6 OS=Oryza sativa subsp. japonica (Rice) PE=2 SV=2	PREDICTED: myb-related protein Myb4-like [Populus euphratica]
	VF21839	0	0	0	0	2.22344	0.57529	--	hypothetical protein POPTR_0001s27010g [Populus trichocarpa]
	VF21804	0	0.0934977	0	0	9.42187	0.259878	WAT1-related protein At1g25270 GN=At1g25270 OS=Arabidopsis thaliana (Mouse-ear cress) PE=2 SV=1	Auxin-induced protein 5NG4, putative [Ricinus communis]
	VF21788	28.4044	20.6865	10.0134	25.5058	186.04	47.9216	3-ketoacyl-CoA synthase 6 GN=T26J14.10 OS=Arabidopsis thaliana (Mouse-ear cress) PE=1 SV=1	hypothetical protein JCGZ_18324 [Jatropha curcas]
	VF21483	11.5019	1.21672	0.762326	16.9339	287.482	3.52648	L-ascorbate oxidase homolog (Precursor) GN=Bp10 OS=Brassica napus (Rape) PE=2 SV=1	SKU5 similar 18 [Theobroma cacao]
	VF21473	2.10376	0.156012	0.305716	8.81525	26.434	0.507831	Probable alkaline/neutral invertase B {ECO:0000305} OS=Arabidopsis thaliana (Mouse-ear cress) PE=1 SV=1	neutral/alkaline invertase [Manihot esculenta]
	VF21397	19.8544	33.5927	45.2163	35.7505	94.486	45.2264	3-dehydrosphinganine reductase TSC10B GN=TSC10B OS=Arabidopsis thaliana (Mouse-ear cress) PE=1 SV=1	hypothetical protein JCGZ_02122 [Jatropha curcas]
	VF21158	17.9517	17.9437	23.5559	50.3036	147.165	54.7489	Sugar carrier protein C GN=STC OS=Ricinus communis (Castor bean) PE=2 SV=1	hypothetical protein JCGZ_21348 [Jatropha curcas]
	VF21055	0.724822	0.085262	0.19	1.24085	3.65516	0.281768	--	hypothetical protein JCGZ_10072 [Jatropha curcas]
	VF20828	4.01746	4.4074	3.49526	3.96653	61.1484	4.84551	Probable polyamine transporter At3g13620 GN=At3g13620 OS=Arabidopsis thaliana (Mouse-ear cress) PE=2 SV=1	amino acid transporter, putative [Ricinus communis]
	VF20762	0	0	0.357343	0.340718	2.3743	0.45468	--	conserved hypothetical protein [Ricinus communis]
	VF20711	0.100493	0	0	0.467108	12.6799	1.83444	Basic secretory protease {ECO:0000303|PubMed:22773449} (Fragments) OS=Boswellia serrata (Indian frankincense) PE=1 SV=1	PREDICTED: uncharacterized protein LOC105108579 [Populus euphratica]
	VF20674	11.4898	17.2325	15.7774	12.4108	39.9314	12.1607	UDP-glucuronate 4-epimerase 3 GN=GAE3 OS=Arabidopsis thaliana (Mouse-ear cress) PE=2 SV=1	hypothetical protein JCGZ_20759 [Jatropha curcas]
	VF20394	29.57	55.2459	75.2596	38.1634	386.314	170.277	Universal stress protein A-like protein GN=At3g01520 OS=Arabidopsis thaliana (Mouse-ear cress) PE=1 SV=2	hypothetical protein JCGZ_25094 [Jatropha curcas]
	VF20340	0.241146	0.316575	0.320486	0.405336	49.7035	8.58439	Lysine histidine transporter 1 GN=LHT1 OS=Arabidopsis thaliana (Mouse-ear cress) PE=1 SV=1	amino acid transporter, putative [Ricinus communis]
	VF20215	10.1327	27.6936	35.766	23.7678	112.681	22.2288	Cysteine-rich repeat secretory protein 12 (Precursor) GN=CRRSP12 OS=Arabidopsis thaliana (Mouse-ear cress) PE=1 SV=2	DUF26 domain-containing protein 1 precursor, putative [Ricinus communis]
	VF19953	39.5648	6.55483	4.70617	188.743	1176.63	40.7295	Beta-amyrin 28-oxidase OS=Panax ginseng (Korean ginseng) PE=2 SV=1	cytochrome P450, putative [Ricinus communis]
	VF19812	20.0619	20.668	17.2873	20.3107	80.0157	31.1956	Uncharacterized aarF domain-containing protein kinase At5g05200, chloroplastic (Precursor) GN=At5g05200 OS=Arabidopsis thaliana (Mouse-ear cress) PE=2 SV=1	hypothetical protein JCGZ_03301 [Jatropha curcas]
	VF19768	0	0	0.079254	0	3.4681	1.40105	Probable 2-oxoglutarate-dependent dioxygenase AOP1.2 GN=AOP1.2 OS=Arabidopsis thaliana (Mouse-ear cress) PE=2 SV=1	hypothetical protein JCGZ_06223 [Jatropha curcas]
	VF19737	43.6588	50.1953	55.2639	48.7632	166.825	47.7452	Proline-rich receptor-like protein kinase PERK8 GN=PERK8 OS=Arabidopsis thaliana (Mouse-ear cress) PE=1 SV=1	hypothetical protein JCGZ_25659 [Jatropha curcas]
	VF19479	24.8297	25.7186	40.317	321.17	10180.6	352.42	Mavicyanin OS=Cucurbita pepo (Vegetable marrow) PE=1 SV=1	hypothetical protein JCGZ_19602 [Jatropha curcas]
	VF18953	4.08241	3.75035	3.72051	3.3909	8.67017	4.19142	--	hypothetical protein JCGZ_01565 [Jatropha curcas]
	VF18851	2.85217	0.193305	9.88765e-07	12.3486	25.6259	2.3771	Probable purine permease 4 GN=PUP4 OS=Arabidopsis thaliana (Mouse-ear cress) PE=2 SV=1	PREDICTED: probable purine permease 4 [Populus euphratica]
	VF18737	18.2421	7.0684	8.92215	26.4514	76.1745	14.0012	Heat shock factor protein HSF24 GN=HSF24 OS=Solanum peruvianum (Peruvian tomato) PE=2 SV=1	hypothetical protein JCGZ_12391 [Jatropha curcas]
	VF18436	0.798762	1.11285	0.528104	1.69352	279.606	38.814	LOB domain-containing protein 20 GN=F20H23.21 OS=Arabidopsis thaliana (Mouse-ear cress) PE=2 SV=1	LOB domain-containing protein, putative [Ricinus communis]
	VF18323	45.2824	11.9654	10.1775	109.608	228.923	9.3456	Probable beta-1,3-galactosyltransferase 17 GN=B3GALT17 OS=Arabidopsis thaliana (Mouse-ear cress) PE=2 SV=2	hypothetical protein JCGZ_21725 [Jatropha curcas]
	VF18211	1.96955	1.8065	2.56406	1.04452	6.68825	0.863621	--	hypothetical protein JCGZ_08774 [Jatropha curcas]
	VF18079	0.639269	0.0238549	0.584596	3.03535e-05	2.10664	0.413103	Protein ENHANCED DISEASE RESISTANCE 2 GN=EDR2 OS=Arabidopsis thaliana (Mouse-ear cress) PE=2 SV=1	hypothetical protein JCGZ_20873 [Jatropha curcas]
	VF17995	0.400454	0.0171236	0.0144411	0.392338	3.61914	0.615211	Cytochrome P450 81E8 {ECO:0000303|PubMed:14617078} OS=Medicago truncatula (Barrel medic) PE=2 SV=1	PREDICTED: isoflavone 2&apos;-hydroxylase-like [Vitis vinifera]
	VF17973	0	0	0	0	1.12385	0	Putative receptor protein kinase ZmPK1 (Precursor) GN=PK1 OS=Zea mays (Maize) PE=2 SV=2	hypothetical protein JCGZ_16083 [Jatropha curcas]
	VF17922	0.294685	0.802481	0.486702	0.344391	5.56574	0	Transcription factor HEC1 GN=K21H1.2 OS=Arabidopsis thaliana (Mouse-ear cress) PE=1 SV=1	hypothetical protein JCGZ_16128 [Jatropha curcas]
	VF17857	4.76431	3.11858	4.37962	3.0038	13.1088	2.50005	--	hypothetical protein JCGZ_04322 [Jatropha curcas]
	VF17843	0.173961	0.303454	0.280143	0.364343	2.50912	0.711056	Pollen-specific leucine-rich repeat extensin-like protein 3 (Precursor) GN=PEX3 OS=Arabidopsis thaliana (Mouse-ear cress) PE=2 SV=1	hypothetical protein POPTR_0014s03600g [Populus trichocarpa]
	VF17740	9.20718	17.9942	15.9751	9.22659	165.052	21.3686	3-ketoacyl-CoA synthase 4 GN=KCS4 OS=Arabidopsis thaliana (Mouse-ear cress) PE=2 SV=1	hypothetical protein JCGZ_04435 [Jatropha curcas]
	VF17571	10.078	6.5354	4.8154	16.2315	32.9322	3.50117	--	hypothetical protein JCGZ_14009 [Jatropha curcas]
	VF17547	61.9331	26.4649	37.7805	127.671	372.444	60.2023	--	conserved hypothetical protein [Ricinus communis]
	VF17312	0	0	0	0.129067	1.28032	0	--	Uncharacterized protein TCM_038456 [Theobroma cacao]
	VF17222	0.459079	0	0.054153	0.371498	1.57912	0.739075	--	hypothetical protein CICLE_v10014152mg [Citrus clementina]
	VF17183	0.305372	0.0602055	0.0391859	0.817726	2.77631	1.21068	Transcription factor bHLH120 GN=MIO24.8 OS=Arabidopsis thaliana (Mouse-ear cress) PE=2 SV=2	hypothetical protein JCGZ_26191 [Jatropha curcas]
	VF17090	0.510677	2.2507	3.32005	0.759703	110.397	39.6477	Probable metal-nicotianamine transporter YSL7 GN=YSL7 OS=Arabidopsis thaliana (Mouse-ear cress) PE=2 SV=1	hypothetical protein JCGZ_21006 [Jatropha curcas]
	VF16744	2.029	3.55175	3.13081	2.24632	14.1534	5.07461	--	hypothetical protein JCGZ_18579 [Jatropha curcas]
	VF16712	0.532362	6.10011	1.84461	0.281232	23.8133	7.39796	Peroxidase 10 (Precursor) GN=F14J22.19 OS=Arabidopsis thaliana (Mouse-ear cress) PE=1 SV=1	Peroxidase 10 precursor, putative [Ricinus communis]
	VF16624	1.3912	4.80149	8.69023	4.83751	97.3383	41.9995	Probable E3 ubiquitin-protein ligase ARI10 GN=ARI10 OS=Arabidopsis thaliana (Mouse-ear cress) PE=2 SV=1	hypothetical protein JCGZ_05740 [Jatropha curcas]
	VF16571	6.40755e-70	0.014898	0.112937	0.0137582	32.2677	0.384317	Uncharacterized protein At1g04910 GN=At1g04910 OS=Arabidopsis thaliana (Mouse-ear cress) PE=2 SV=1	conserved hypothetical protein [Ricinus communis]
	VF16482	2.09904	11.784	4.07831	2.69347	57.0414	8.02653	Protein EXORDIUM (Precursor) GN=EXO OS=Arabidopsis thaliana (Mouse-ear cress) PE=2 SV=1	conserved hypothetical protein [Ricinus communis]
	VF16443	29.2637	18.7348	15.1741	33.7603	84.6176	31.9704	--	Cation transport protein chaC, putative [Ricinus communis]
	VF16316	7.09722	8.66021	10.7316	10.517	42.5557	12.9622	Probable glycosyltransferase At5g03795 GN=At5g03795 OS=Arabidopsis thaliana (Mouse-ear cress) PE=3 SV=2	hypothetical protein JCGZ_02707 [Jatropha curcas]
	VF16313	0	0	0	0.487742	1.44422	0	Ethylene-responsive transcription factor RAP2-11 GN=T29J13.210 OS=Arabidopsis thaliana (Mouse-ear cress) PE=2 SV=1	hypothetical protein JCGZ_02710 [Jatropha curcas]
	VF16169	0.299447	0.0345671	6.50545e-63	4.0552	18.4911	0.0798305	Putative DNA-binding protein ESCAROLA GN=ESC OS=Arabidopsis thaliana (Mouse-ear cress) PE=2 SV=1	DNA-binding family protein [Populus trichocarpa]
	VF16139	12.9647	8.04201	7.61194	22.9067	99.3475	20.1379	E3 ubiquitin protein ligase DRIP2 GN=DRIP2 OS=Arabidopsis thaliana (Mouse-ear cress) PE=1 SV=1	hypothetical protein JCGZ_23506 [Jatropha curcas]
	VF16119	3.04571	1.93682	1.60902	1.91431	7.23981	1.62377	Calcium-transporting ATPase 12, plasma membrane-type GN=ACA12 OS=Arabidopsis thaliana (Mouse-ear cress) PE=2 SV=1	cation-transporting atpase plant, putative [Ricinus communis]
	VF16069	104.008	123.359	64.4749	88.4146	287.814	135.6	Acyltransferase-like protein At1g54570, chloroplastic (Precursor) GN=At1g54570 OS=Arabidopsis thaliana (Mouse-ear cress) PE=2 SV=1	hypothetical protein JCGZ_23443 [Jatropha curcas]
	VF15819	243.196	208.149	121.014	304.173	1930.23	541.26	--	hypothetical protein JCGZ_23201 [Jatropha curcas]
	VF15715	0	0	0.0247928	0	1.1057	0.51567	--	conserved hypothetical protein [Ricinus communis]
	VF15712	0.171736	0.379745	0.193209	0.141692	1.2948	0.37893	Actin OS=Coleochaete scutata PE=2 SV=1	actin, putative [Ricinus communis]
	VF15651	0	0	0.139261	0	4.02928	1.86418	GDSL esterase/lipase At5g33370 (Precursor) GN=At5g33370 OS=Arabidopsis thaliana (Mouse-ear cress) PE=2 SV=1	hypothetical protein JCGZ_22352 [Jatropha curcas]
	VF15558	0.0604128	0.306855	0.147246	0.136892	70.8054	2.73546	Dehydrodolichyl diphosphate synthase 6 GN=At2g17570 OS=Arabidopsis thaliana (Mouse-ear cress) PE=2 SV=2	PREDICTED: dehydrodolichyl diphosphate synthase 6 isoform X2 [Populus euphratica]
	VF15387	0	0	0	0	1.23633	0	Thionin-like protein 2 (Precursor) GN=At1g12663 OS=Arabidopsis thaliana (Mouse-ear cress) PE=3 SV=1	hypothetical protein CICLE_v10027058mg [Citrus clementina]
	VF14772	0.295626	1.15706	2.16041	0.328516	307.439	84.0999	CASP-like protein 1C1 GN=RCOM_1174750 OS=Ricinus communis (Castor bean) PE=2 SV=1	conserved hypothetical protein [Ricinus communis]
	VF14748	10.607	0.777555	0.449353	19.2778	63.8498	26.6438	O-acyltransferase WSD1 GN=WSD1 OS=Arabidopsis thaliana (Mouse-ear cress) PE=2 SV=1	hypothetical protein JCGZ_25769 [Jatropha curcas]
	VF14529	13.778	13.1634	21.2595	14.0795	56.0865	3.62998	--	hypothetical protein JCGZ_05271 [Jatropha curcas]
	VF14526	0.847954	0.333076	0.29604	0.946483	5.33495	0.320874	Probable WRKY transcription factor 19 GN=WRKY19 OS=Arabidopsis thaliana (Mouse-ear cress) PE=2 SV=1	hypothetical protein JCGZ_21104 [Jatropha curcas]
	VF14457	1.15555	2.99066	0.988649	2.56395	13.3631	5.6575	Alkane hydroxylase MAH1 {ECO:0000303|PubMed:17905869} OS=Arabidopsis thaliana (Mouse-ear cress) PE=2 SV=1	hypothetical protein JCGZ_09419 [Jatropha curcas]
	VF14437	37.561	26.8647	25.3658	43.0589	144.179	29.138	--	hypothetical protein JCGZ_04876 [Jatropha curcas]
	VF14388	10.2309	8.01461	4.42993	12.8847	26.2731	8.696	ABC transporter B family member 2 (Precursor) GN=F20B18.70 OS=Arabidopsis thaliana (Mouse-ear cress) PE=1 SV=3	P-glycoprotein [Populus trichocarpa]
	VF14345	10.3939	13.2442	13.8073	13.3907	111.739	16.0121	Methylcrotonoyl-CoA carboxylase beta chain, mitochondrial (Precursor) OS=Arabidopsis thaliana (Mouse-ear cress) PE=2 SV=1	hypothetical protein JCGZ_01591 [Jatropha curcas]
	VF14330	7.40186	7.86533	7.94456	7.06539	44.3805	12.9577	--	conserved hypothetical protein [Ricinus communis]
	VF14184	13.7485	7.43229	5.07879	10.7664	31.747	11.5704	Ubiquinol oxidase 4, chloroplastic/chromoplastic (Precursor) GN=T10I14_90 OS=Arabidopsis thaliana (Mouse-ear cress) PE=1 SV=2	Alternative oxidase 4, chloroplast precursor, putative [Ricinus communis]
	VF14036	18.6454	13.8722	13.2761	20.9378	52.7513	14.6523	Transcription factor-like protein DPB GN=F12E4.160 OS=Arabidopsis thaliana (Mouse-ear cress) PE=1 SV=1	hypothetical protein JCGZ_16550 [Jatropha curcas]
	VF14017	48.6749	64.7815	55.3467	50.7535	138.362	64.1503	Cell division protein FtsZ homolog 2-1, chloroplastic (Precursor) GN=FTSZ2-1 OS=Arabidopsis thaliana (Mouse-ear cress) PE=1 SV=2	hypothetical protein JCGZ_23683 [Jatropha curcas]
	VF13998	38.1295	37.4462	45.0424	37.6509	116.096	45.5228	Uridine nucleosidase 1 GN=URH1 OS=Arabidopsis thaliana (Mouse-ear cress) PE=1 SV=2	hypothetical protein JCGZ_23665 [Jatropha curcas]
	VF13823	123.055	82	83.893	130.753	264.167	93.2462	Acetyl-CoA acetyltransferase, cytosolic 1 GN=MIF21.12 OS=Arabidopsis thaliana (Mouse-ear cress) PE=2 SV=1	hypothetical protein JCGZ_18519 [Jatropha curcas]
	VF13811	28.8921	11.8754	5.99882	35.8186	597.612	34.7416	Protein ECERIFERUM 1 GN=CER2 OS=Arabidopsis thaliana (Mouse-ear cress) PE=1 SV=1	hypothetical protein JCGZ_15895 [Jatropha curcas]
	VF13646	41.5133	37.4045	46.0109	155.291	372.95	37.964	--	hypothetical protein JCGZ_17848 [Jatropha curcas]
	VF13638	0.304513	0.0843585	0.31674	1.03459	40.9246	4.31327	Non-functional NADPH-dependent codeinone reductase 2 GN=COR2 OS=Papaver somniferum (Opium poppy) PE=1 SV=1	hypothetical protein JCGZ_17856 [Jatropha curcas]
	VF13476	0.504483	51.4991	84.7488	124.604	20776.9	459.761	Putative RING-H2 finger protein ATL21A (Precursor) GN=ATL21A OS=Arabidopsis thaliana (Mouse-ear cress) PE=3 SV=1	hypothetical protein JCGZ_20454 [Jatropha curcas]
	VF13215	64.8741	2.84531	2.59155	197.601	585.156	12.0846	Cytochrome P450 87A3 GN=OSJNBa0088I22.16 OS=Oryza sativa subsp. japonica (Rice) PE=2 SV=3	hypothetical protein JCGZ_18828 [Jatropha curcas]
	VF12971	0.998809	1.66966	1.01265	2.20722	21.5244	1.96827	--	glycosyltransferase, putative [Ricinus communis]
	VF12792	0.104327	0	0	0.0349272	1.13165	0	NAC domain-containing protein 55 GN=MJK13.16 OS=Arabidopsis thaliana (Mouse-ear cress) PE=2 SV=1	NAC transcription factor 077 [Jatropha curcas]
	VF12692	0.699995	0	0	0	1.60708	0.638475	--	conserved hypothetical protein [Ricinus communis]
	VF12604	0.592775	2.12559	0.286112	1.59612	10.0117	3.46954	--	hypothetical protein JCGZ_22865 [Jatropha curcas]
	VF12277	7.99577	4.12529	3.8051	11.6138	25.0432	10.1789	DnaJ protein ERDJ3A (Precursor) GN=T16O11.7 OS=Arabidopsis thaliana (Mouse-ear cress) PE=1 SV=1	hypothetical protein JCGZ_00451 [Jatropha curcas]
	VF12258	0.246554	0.623889	0.459982	0.551245	4.05391	0.50441	--	Gamma-interferon-inducible lysosomal thiol reductase precursor, putative [Ricinus communis]
	VF11921	4.37929	11.1442	8.22053	4.83509	80.2042	11.3555	--	hypothetical protein JCGZ_07158 [Jatropha curcas]
	VF11734	53.3914	14.3467	8.87191	59.267	464.923	22.2287	Long chain acyl-CoA synthetase 1 GN=T8I13.8 OS=Arabidopsis thaliana (Mouse-ear cress) PE=2 SV=1	hypothetical protein JCGZ_14059 [Jatropha curcas]
	VF11715	4.47988	7.03569	5.22125	3.14212	20.2081	6.68181	GDSL esterase/lipase At1g09390 (Precursor) GN=At1g09390 OS=Arabidopsis thaliana (Mouse-ear cress) PE=2 SV=1	hypothetical protein JCGZ_14076 [Jatropha curcas]
	VF11684	3.05773e-35	0.502695	0.190531	4.94343e-11	1.77117	4.74197e-20	--	hypothetical protein JCGZ_14103 [Jatropha curcas]
	VF11676	10.3073	6.84097	8.24447	27.8753	301.314	15.263	ABC transporter B family member 11 GN=T14P4.15 OS=Arabidopsis thaliana (Mouse-ear cress) PE=2 SV=1	hypothetical protein JCGZ_14109 [Jatropha curcas]
	VF11585	12.6338	10.4538	9.18366	15.1068	66.2708	30.1348	--	conserved hypothetical protein [Ricinus communis]
	VF11232	0.337348	0.655775	1.61966	0.338891	7.65315	2.52565	Uncharacterized protein At1g28695 (Precursor) GN=At1g28695 OS=Arabidopsis thaliana (Mouse-ear cress) PE=2 SV=1	hypothetical protein JCGZ_14658 [Jatropha curcas]
	VF11063	3.08486	3.19649	3.05378	2.99673	53.6269	5.57339	Probable plastid-lipid-associated protein 13, chloroplastic (Precursor) GN=T24P15.4 OS=Arabidopsis thaliana (Mouse-ear cress) PE=2 SV=2	hypothetical protein JCGZ_25539 [Jatropha curcas]
	VF10899	48.5062	23.0238	37.5283	55.4237	132.642	30.0366	--	Uncharacterized protein TCM_002679 [Theobroma cacao]
	VF10845	0.0156453	0.506317	0.0111556	0.238467	13.8779	3.5023	Putative serine/threonine-protein kinase-like protein CCR3 (Precursor) GN=F27K19.130 OS=Arabidopsis thaliana (Mouse-ear cress) PE=2 SV=1	hypothetical protein JCGZ_08457 [Jatropha curcas]
	VF10842	71.0294	21.8887	20.9241	86.7115	339.874	117.744	Omega-3 fatty acid desaturase, chloroplastic (Precursor) GN=FAD7 OS=Sesamum indicum (Oriental sesame) PE=2 SV=1	hypothetical protein JCGZ_08453 [Jatropha curcas]
	VF10723	0	0	0	0	6.75364	0.0678515	Extra-large guanine nucleotide-binding protein 3 GN=XLG3 OS=Arabidopsis thaliana (Mouse-ear cress) PE=1 SV=1	hypothetical protein POPTR_0019s15060g [Populus trichocarpa]
	VF10690	1.80287	0.459056	0.577024	1.59505	28.9141	5.84089	--	hypothetical protein POPTR_0013s15630g [Populus trichocarpa]
	VF10398	12.2212	11.4536	10.503	18.1856	42.9757	17.3959	Phosphatidylinositol/phosphatidylcholine transfer protein SFH12 GN=SFH12 OS=Arabidopsis thaliana (Mouse-ear cress) PE=2 SV=1	Sec14 cytosolic factor, putative [Ricinus communis]
	VF10361	34.3582	38.3462	34.9045	27.6095	381.291	106.886	Aldehyde dehydrogenase family 3 member F1 GN=ALDH3F1 OS=Arabidopsis thaliana (Mouse-ear cress) PE=2 SV=2	hypothetical protein JCGZ_13661 [Jatropha curcas]
	VF10293	2.50608	0.119164	0.0380132	6.43059	19.8949	0.111543	Sugar carrier protein C GN=STC OS=Ricinus communis (Castor bean) PE=2 SV=1	hypothetical protein JCGZ_20668 [Jatropha curcas]
	VF10283	3.58628	12.672	8.46435	271.344	697.598	164.189	Protein HOTHEAD (Precursor) GN=F3N23.17 OS=Arabidopsis thaliana (Mouse-ear cress) PE=1 SV=1	hypothetical protein JCGZ_20679 [Jatropha curcas]
	VF10280	86.897	76.5519	91.0444	106.694	453.04	165.961	Hydroxymethylglutaryl-CoA synthase GN=T26M18.30 OS=Arabidopsis thaliana (Mouse-ear cress) PE=1 SV=2	HMG-CoA synthase 2 [Hevea brasiliensis]
	VF10170	1.96921e-20	3.11187e-43	1.5956e-186	5.35625e-42	1.2935	2.45354e-53	ADP-ribosylation factor GTPase-activating protein AGD12 GN=F7J7.100 OS=Arabidopsis thaliana (Mouse-ear cress) PE=1 SV=1	hypothetical protein JCGZ_13428 [Jatropha curcas]
	VF10049	2.61526	2.46187	0.749918	2.56971	21.946	5.93949	Cytochrome P450 704C1 GN=CYP704C1 OS=Pinus taeda (Loblolly pine) PE=2 SV=1	hypothetical protein JCGZ_14500 [Jatropha curcas]
	VF10034	0.310212	1.53892	0.541092	0.319404	9.01769	1.85742	LOB domain-containing protein 18 GN=F4L23.7 OS=Arabidopsis thaliana (Mouse-ear cress) PE=2 SV=2	hypothetical protein JCGZ_14515 [Jatropha curcas]
	VF09500	0.58045	0.258479	3.03564e-05	0.000109285	1.5891	1.2188e-05	DEAD-box ATP-dependent RNA helicase 21 GN=RH21 OS=Arabidopsis thaliana (Mouse-ear cress) PE=2 SV=1	hypothetical protein JCGZ_09094 [Jatropha curcas]
	VF09490	0	0	0	0.0626151	3.76093	0.23297	Beta-glucosidase 24 (Precursor) OS=Oryza sativa subsp. japonica (Rice) PE=2 SV=1	beta-glucosidase, putative [Ricinus communis]
	VF09472	0	0	0	0	2.83568	0	--	hypothetical protein JCGZ_25840 [Jatropha curcas]
	VF09374	1.73643	2.60553	2.43059	2.30091	12.0547	2.42903	Probable ubiquitin-conjugating enzyme E2 25 GN=UBC25 OS=Arabidopsis thaliana (Mouse-ear cress) PE=2 SV=1	hypothetical protein JCGZ_19017 [Jatropha curcas]
	VF09291	1.22833	3.50283	5.35171	1.67279	15.9326	3.20869	Major allergen Pru ar 1 OS=Prunus armeniaca (Apricot) PE=1 SV=1	Major allergen Pru ar, putative [Ricinus communis]
	VF09257	4.27342	6.29955	5.37201	5.69284	56.9467	6.88394	--	hypothetical protein JCGZ_18904 [Jatropha curcas]
	VF09244	0	1.52965	2.09112	1.05366	916.428	6.75335	Phylloplanin (Precursor) OS=Nicotiana tabacum (Common tobacco) PE=1 SV=1	hypothetical protein JCGZ_18893 [Jatropha curcas]
	VF09186	3.89	4.17495	3.31352	4.82662	12.3126	2.86098	Disease resistance protein RFL1 GN=RFL1 OS=Arabidopsis thaliana (Mouse-ear cress) PE=3 SV=2	Disease resistance protein RPS2, putative [Ricinus communis]
	VF09123	3.00325	0.819489	1.39686	3.16366	6.75091	1.40368	--	hypothetical protein JCGZ_01514 [Jatropha curcas]
	VF09059	37.925	32.5868	27.6008	32.7615	192.063	41.2224	Polyprenol reductase 2 GN=At2g16530 OS=Arabidopsis thaliana (Mouse-ear cress) PE=1 SV=2	hypothetical protein JCGZ_06497 [Jatropha curcas]
	VF08856	1.15169	0	0	0	4.58149	2.00549	Brefeldin A-inhibited guanine nucleotide-exchange protein 2 GN=BIG2 OS=Arabidopsis thaliana (Mouse-ear cress) PE=2 SV=1	hypothetical protein JCGZ_14513 [Jatropha curcas]
	VF08631	1.6679	2.16777	1.89909	1.88967	20.1323	1.81	CRC domain-containing protein TSO1 GN=TSO1 OS=Arabidopsis thaliana (Mouse-ear cress) PE=1 SV=1	hypothetical protein JCGZ_06186 [Jatropha curcas]
	VF08578	0.0770514	0.0958066	0.0817264	0.218417	9.78667	0.230075	1-aminocyclopropane-1-carboxylate oxidase 4 GN=ACO4 OS=Petunia hybrida (Petunia) PE=3 SV=1	putative ACC oxidase [Rubus idaeus]
	VF08439	0.223086	0.157422	0.195029	0.380653	29.4821	13.1986	DnaJ protein homolog 1 (Precursor; Fragment) GN=DNAJ1 OS=Allium porrum (Leek) PE=2 SV=1	hypothetical protein JCGZ_12138 [Jatropha curcas]
	VF08325	47.4513	38.8104	42.821	44.6033	140.362	49.7162	3-oxoacyl-[acyl-carrier-protein] synthase 3 B, chloroplastic (Precursor) GN=KAS3B OS=Cuphea wrightii (Wright&apos;s waxweed) PE=2 SV=1	ketoacyl-ACP synthase III [Vernicia fordii]
	VF08300	3.43829	1.44	2.69535	0.214232	6.97254	0.279962	--	hypothetical protein JCGZ_13728 [Jatropha curcas]
	VF08107	12.1559	1.00852	0.761338	28.3866	334.2	17.9952	--	hypothetical protein JCGZ_15991 [Jatropha curcas]
	VF08097	11.4911	18.873	18.6276	16.8229	44.0947	17.1895	--	conserved hypothetical protein [Ricinus communis]
	VF08053	0	0	0	0.504835	1.32861	0	Cytochrome c oxidase subunit 1 GN=COX1 OS=Raphanus sativus (Radish) PE=3 SV=1	cytochrome oxidase subunit 1, partial (mitochondrion) [Citrus sinensis]
	VF08043	0.170372	0.0178179	0.0778709	0.290221	16.1743	0.200187	Protein NRT1/ PTR FAMILY 5.2 GN=MCL19.10 OS=Arabidopsis thaliana (Mouse-ear cress) PE=2 SV=1	hypothetical protein JCGZ_17646 [Jatropha curcas]
	VF07968	8.07706	19.1006	17.3562	10.9772	139.552	14.5799	--	hypothetical protein JCGZ_06972 [Jatropha curcas]
	VF07258	6.51854	7.82534	8.425	6.89102	25.2528	10.9491	BTB/POZ domain-containing protein At3g09030 GN=At3g09030 OS=Arabidopsis thaliana (Mouse-ear cress) PE=2 SV=1	hypothetical protein JCGZ_25042 [Jatropha curcas]
	VF07250	4.72858	1.51596	1.80797	5.51077	15.2158	6.32989	Uncharacterized protein At4g19900 GN=At4g19900 OS=Arabidopsis thaliana (Mouse-ear cress) PE=2 SV=1	hypothetical protein POPTR_0011s04750g [Populus trichocarpa]
	VF07153	4.60776	6.12829	3.65147	2.75297	23.353	7.59953	Uncharacterized protein At1g32220, chloroplastic (Precursor) GN=At1g32220 OS=Arabidopsis thaliana (Mouse-ear cress) PE=2 SV=1	conserved hypothetical protein [Ricinus communis]
	VF07067	0	0	0.54067	0	2.49828	0	--	RNA exonuclease, putative [Ricinus communis]
	VF07041	23.4356	29.2133	29.5985	20.9541	59.9093	17.0303	Uncharacterized PKHD-type hydroxylase At1g22950 GN=At1g22950 OS=Arabidopsis thaliana (Mouse-ear cress) PE=2 SV=2	hypothetical protein JCGZ_10691 [Jatropha curcas]
	VF06538	70.7622	84.6552	76.031	76.8964	188.395	89.0393	Serine decarboxylase GN=F2J6.7 OS=Arabidopsis thaliana (Mouse-ear cress) PE=1 SV=1	hypothetical protein JCGZ_25194 [Jatropha curcas]
	VF06315	28.5492	29.0166	28.0599	35.1713	80.7785	23.2483	Homeobox-leucine zipper protein ANTHOCYANINLESS 2 GN=ANL2 OS=Arabidopsis thaliana (Mouse-ear cress) PE=2 SV=1	hypothetical protein JCGZ_14453 [Jatropha curcas]
	VF06286	6.9535	9.34651	7.87724	9.72842	20.753	5.73127	Uncharacterized protein At3g61260 GN=At3g61260 OS=Arabidopsis thaliana (Mouse-ear cress) PE=1 SV=1	hypothetical protein JCGZ_14423 [Jatropha curcas]
	VF06264	80.5225	38.3143	39.9451	118.057	314.949	94.7683	--	hypothetical protein JCGZ_14406 [Jatropha curcas]
	VF06149	0.210017	0.332191	0.262545	0.310636	1.4762	0.193017	--	hypothetical protein JCGZ_14295 [Jatropha curcas]
	VF05733	70.8588	91.3369	353.951	78.6469	944.687	29.2898	Chalcone synthase OS=Hypericum androsaemum (Tutsan) PE=1 SV=1	hypothetical protein JCGZ_06413 [Jatropha curcas]
	VF05629	32.8612	0.59475	0.485281	50.1177	157.025	1.70718	Glucuronoxylan 4-O-methyltransferase 1 GN=GXM1 OS=Arabidopsis thaliana (Mouse-ear cress) PE=1 SV=1	hypothetical protein JCGZ_10113 [Jatropha curcas]
	VF05619	0.303546	0.155061	0.21777	0.390057	1.04502	0.180329	--	hypothetical protein JCGZ_10124 [Jatropha curcas]
	VF05615	0.543043	0.366131	0.1807	0.693393	2.48954	0.546609	Non-symbiotic hemoglobin 2 GN=HB2 OS=Gossypium hirsutum (Upland cotton) PE=3 SV=1	hypothetical protein JCGZ_01563 [Jatropha curcas]
	VF05451	12.7209	9.16746	10.5057	9.85647	145.88	14.7976	MATE efflux family protein 9 GN=F3L12.7 OS=Arabidopsis thaliana (Mouse-ear cress) PE=2 SV=1	hypothetical protein JCGZ_09282 [Jatropha curcas]
	VF05449	3.42631	2.17639	2.56019	4.133	15.0781	3.98732	Molybdate transporter 2 GN=F5I6.6 OS=Arabidopsis thaliana (Mouse-ear cress) PE=1 SV=2	hypothetical protein JCGZ_06215 [Jatropha curcas]
	VF05337	0.0886026	0.59861	1.57348	0.400236	10.2449	3.38374	Methylesterase 10 GN=MES10 OS=Arabidopsis thaliana (Mouse-ear cress) PE=2 SV=1	PREDICTED: methylesterase 10-like [Vitis vinifera]
	VF05328	1.60526	0.972081	0.643051	1.38601	3.77296	1.87065	Pentatricopeptide repeat-containing protein At5g66520 GN=PCMP-H61 OS=Arabidopsis thaliana (Mouse-ear cress) PE=2 SV=1	hypothetical protein JCGZ_11648 [Jatropha curcas]
	VF05327	27.6172	44.0295	41.1382	71.4764	406.968	96.7473	--	hypothetical protein JCGZ_11647 [Jatropha curcas]
	VF05279	0.232949	0	0	0.639652	1.58542	0	--	protein binding protein, putative [Ricinus communis]
	VF05074	0.546319	0.620074	0.0467823	0.239348	1.277	0.421931	--	hypothetical protein JCGZ_11421 [Jatropha curcas]
	VF05031	8.43292	4.18652	6.18637	39.7889	80.1458	17.3048	--	hypothetical protein JCGZ_05841 [Jatropha curcas]
	VF04926	2.60295e-14	1.31092e-37	0.63192	1.61893	4.48652	0.63403	LOB domain-containing protein 6 GN=F5I14.15 OS=Arabidopsis thaliana (Mouse-ear cress) PE=1 SV=1	LOB domain protein 6 [Populus trichocarpa]
	VF04582	8.34463	0.392112	0.204227	40.6472	137.094	40.6731	Pentatricopeptide repeat-containing protein At1g06145 GN=T21E18.20 OS=Arabidopsis thaliana (Mouse-ear cress) PE=2 SV=2	pentatricopeptide repeat-containing protein, putative [Ricinus communis]
	VF04520	34.3383	26.9069	26.6715	41.1285	90.8387	25.7684	UDP-arabinose 4-epimerase 1 GN=MUR4 OS=Arabidopsis thaliana (Mouse-ear cress) PE=1 SV=1	hypothetical protein JCGZ_09147 [Jatropha curcas]
	VF04209	31.5688	0.984417	1.30687	53.1331	152.302	35.7479	WAT1-related protein At5g07050 GN=At5g07050 OS=Arabidopsis thaliana (Mouse-ear cress) PE=2 SV=1	hypothetical protein JCGZ_02310 [Jatropha curcas]
	VF04164	0.274526	0.154804	0.66115	0.0529037	39.5444	8.05684	Long-chain-alcohol oxidase FAO1 GN=FAO1 OS=Lotus japonicus (Lotus corniculatus var. japonicus) PE=1 SV=1	hypothetical protein JCGZ_02359 [Jatropha curcas]
	VF04001	0.12188	0	0	0	2.16028	0	--	conserved hypothetical protein [Ricinus communis]
	VF03930	1.27963	1.32103	1.32327	1.38139	151.377	19.4915	Fatty acid desaturase 4, chloroplastic (Precursor) GN=F10M23.370 OS=Arabidopsis thaliana (Mouse-ear cress) PE=2 SV=1	hypothetical protein JCGZ_00861 [Jatropha curcas]
	VF03825	10.9413	16.0511	15.3139	8.62407	65.2194	22.1717	Mannan endo-1,4-beta-mannosidase 6 (Precursor) GN=MAN6 OS=Arabidopsis thaliana (Mouse-ear cress) PE=2 SV=1	hypothetical protein JCGZ_00640 [Jatropha curcas]
	VF03789	0.251763	0.506111	0.168839	0.374005	1.55434	0.677073	U-box domain-containing protein 16 GN=PUB16 OS=Arabidopsis thaliana (Mouse-ear cress) PE=2 SV=1	hypothetical protein JCGZ_00368 [Jatropha curcas]
	VF03649	2.05839	0.726916	1.41914	1.642	29.8031	3.41205	Protein PHR1-LIKE 1 GN=PHL1 OS=Arabidopsis thaliana (Mouse-ear cress) PE=1 SV=1	hypothetical protein JCGZ_19790 [Jatropha curcas]
	VF03597	0.273953	0	0.364339	1.00377	3.5776	0.759246	Zeatin O-glucosyltransferase GN=ZOG1 OS=Phaseolus lunatus (Lima bean) PE=2 SV=1	JHL06B08.5 [Jatropha curcas]
	VF03401	2.77659	0.0692554	0.0275142	5.15619	10.3877	0.173125	Ubiquitin carboxyl-terminal hydrolase 12 GN=UBP12 OS=Arabidopsis thaliana (Mouse-ear cress) PE=1 SV=2	hypothetical protein JCGZ_24937 [Jatropha curcas]
	VF03347	15.9974	16.0658	17.1569	14.4104	97.3496	16.8649	TPR repeat-containing thioredoxin TDX GN=MEB5.10/MEB5.9 OS=Arabidopsis thaliana (Mouse-ear cress) PE=1 SV=1	hypothetical protein JCGZ_22922 [Jatropha curcas]
	VF03120	15.8861	2.14957	1.41893	20.4262	121.3	29.837	Bark storage protein A (Precursor) GN=BSPA OS=Populus deltoides (Eastern poplar) PE=2 SV=1	hypothetical protein JCGZ_07761 [Jatropha curcas]
	VF03023	0.86313	0.048828	0.114001	1.24321	3.5323	0.584662	Probable protein S-acyltransferase 3 GN=PAT03 OS=Arabidopsis thaliana (Mouse-ear cress) PE=2 SV=1	hypothetical protein JCGZ_23042 [Jatropha curcas]
	VF02974	0.982275	0.982939	1.41999	0.83658	43.9431	1.90034	Long-chain-alcohol oxidase FAO4A GN=FAO4A OS=Arabidopsis thaliana (Mouse-ear cress) PE=3 SV=2	hypothetical protein JCGZ_06718 [Jatropha curcas]
	VF02895	2.94733e-08	6.7685e-05	0.336659	1.94322e-09	1.09949	0.52593	Cyclic dof factor 4 GN=T14G11.26 OS=Arabidopsis thaliana (Mouse-ear cress) PE=2 SV=1	hypothetical protein JCGZ_21565 [Jatropha curcas]
	VF02840	0	0	0	0	1.46558	0	G-type lectin S-receptor-like serine/threonine-protein kinase At5g24080 (Precursor) GN=At5g24080 OS=Arabidopsis thaliana (Mouse-ear cress) PE=2 SV=1	hypothetical protein JCGZ_21614 [Jatropha curcas]
	VF02774	11.5531	7.21431	4.44621	9.49612	87.5568	7.9813	Pentatricopeptide repeat-containing protein At4g21065 GN=PCMP-H28 OS=Arabidopsis thaliana (Mouse-ear cress) PE=2 SV=2	pentatricopeptide repeat-containing protein, putative [Ricinus communis]
	VF02773	11.9938	3.68836	5.85982	10.0486	54.1138	11.1485	Pentatricopeptide repeat-containing protein At4g21065 GN=PCMP-H28 OS=Arabidopsis thaliana (Mouse-ear cress) PE=2 SV=2	pentatricopeptide repeat-containing protein, putative [Ricinus communis]
	VF02730	0	0.0630978	0.124195	0.490622	1.82801	0.212939	Protein TIFY 5A GN=T2H7 OS=Arabidopsis thaliana (Mouse-ear cress) PE=1 SV=1	JAZ8 [Hevea brasiliensis]
	VF02509	1.08845	1.06812	0.123494	2.04935	8.39485	0.780297	Glutamate receptor 2.7 (Precursor) GN=GLR2.7 OS=Arabidopsis thaliana (Mouse-ear cress) PE=2 SV=3	PREDICTED: glutamate receptor 2.1-like [Populus euphratica]
	VF02344	0.114453	0.974627	1.02591	0.102723	2.06874	0.477388	Pentatricopeptide repeat-containing protein At5g65560 GN=At5g65560 OS=Arabidopsis thaliana (Mouse-ear cress) PE=2 SV=1	hypothetical protein JCGZ_18725 [Jatropha curcas]
	VF02200	48.3222	29.5012	30.2914	60.0989	136.888	32.4972	--	hypothetical protein JCGZ_01539 [Jatropha curcas]
	VF01941	0.0372926	0.163938	0.20818	0.537757	1.1534	0.265332	--	hypothetical protein JCGZ_04017 [Jatropha curcas]
	VF01689	0	1.99829	0.915891	1.15214	23.5429	5.86283	--	conserved hypothetical protein [Ricinus communis]
	VF01512	1.22549	0.534386	0.45485	1.13682	14.2894	0.58195	Potassium transporter 5 GN=T9E8.160 OS=Arabidopsis thaliana (Mouse-ear cress) PE=1 SV=1	Potassium transporter, putative [Ricinus communis]
	VF01032	2.65004	4.53247	2.75163	3.1118	13.7881	5.14105	--	hypothetical protein JCGZ_27134 [Jatropha curcas]
	VF01002	0.406068	0.269201	0	0.126751	1.06002	0.280562	--	conserved hypothetical protein [Ricinus communis]
	VF00839	150.066	61.2338	53.4571	160.238	398.874	123.856	Bidirectional sugar transporter SWEET1 GN=SWEET1 OS=Arabidopsis thaliana (Mouse-ear cress) PE=1 SV=1	conserved hypothetical protein [Ricinus communis]
	VF00803	2.75702e-21	0.67239	3.77952e-09	0.0113861	1.91315	3.8945e-07	Probable calcium-binding protein CML25 GN=CML25 OS=Arabidopsis thaliana (Mouse-ear cress) PE=2 SV=1	hypothetical protein JCGZ_04755 [Jatropha curcas]
	VF00648	0	0.0389778	0	0	1.46151	0	L-Ala-D/L-amino acid epimerase GN=POPTR_0012s05040g OS=Populus trichocarpa (Western balsam poplar) PE=3 SV=2	hypothetical protein JCGZ_13007 [Jatropha curcas]
	VF00645	0.0518305	0	0	0.0376802	1.41447	0.701028	Serpin-Z3 GN=At2g26390 OS=Arabidopsis thaliana (Mouse-ear cress) PE=3 SV=1	serpin-ZX-like protein [Solanum tuberosum]
	VF00539	18.5725	16.6037	17.1062	19.4913	57.1454	17.6996	FRIGIDA-like protein 3 GN=FRL3 OS=Arabidopsis thaliana (Mouse-ear cress) PE=1 SV=1	hypothetical protein JCGZ_12486 [Jatropha curcas]
	VF00446	1.12021	0	0.0858455	4.29544	35.3197	15.7127	--	hypothetical protein JCGZ_12559 [Jatropha curcas]
	VF00182	5.73282	1.87471	1.5277	5.26827	28.0227	3.09512	--	hypothetical protein JCGZ_13297 [Jatropha curcas]
	VF00059	73.4677	0.867198	2.70086	107.697	498.224	41.627	Probable aspartic protease At2g35615 (Precursor) GN=At2g35615 OS=Arabidopsis thaliana (Mouse-ear cress) PE=3 SV=1	SAUR-like auxin-responsive protein family [Theobroma cacao]
	VF00057	0.132203	0.626108	0.943894	1.02361	310.898	1.07414	Aspartic proteinase CDR1 (Precursor) GN=CDR1 OS=Arabidopsis thaliana (Mouse-ear cress) PE=1 SV=1	Aspartic proteinase nepenthesin-1 precursor, putative [Ricinus communis]
	VF00056	11.49	13.1322	13.2798	152.034	828.351	16.0766	Aspartic proteinase CDR1 (Precursor) GN=CDR1 OS=Arabidopsis thaliana (Mouse-ear cress) PE=1 SV=1	hypothetical protein JCGZ_02616 [Jatropha curcas]
	VFNG6240	35.7047	42.5775	38.9418	58.4147	275.685	87.7522	NEDD8-like protein RUB2 (Precursor) GN=T20F21.24 OS=Arabidopsis thaliana (Mouse-ear cress) PE=1 SV=3	ubiquitin-like protein [Phaseolus vulgaris]
	VFNG6223	0.0860513	0.24876	0.0736233	0.227676	2.08078	0.142923	Putative ribonuclease H protein At1g65750 GN=At1g65750 OS=Arabidopsis thaliana (Mouse-ear cress) PE=3 SV=1	PREDICTED: putative ribonuclease H protein At1g65750-like [Citrus sinensis]
	VFNG556	0	0	0	0.0264942	1.49798	0.100752	--	PREDICTED: replication protein A 70 kDa DNA-binding subunit-like isoform X1 [Pyrus x bretschneideri]
	VFNG5303	0.749635	0.807874	0.68233	1.42521	231.26	0.797108	Alcohol dehydrogenase-like 2 GN=At1g22440 OS=Arabidopsis thaliana (Mouse-ear cress) PE=2 SV=1	hypothetical protein JCGZ_15821 [Jatropha curcas]
	VFNG5089	0.111831	0.0404806	0.107415	0.387192	3.86192	1.61287	Endonuclease OS=Nicotiana tabacum (Common tobacco) PE=2 SV=1	disease resistance protein [Brassica rapa subsp. pekinensis]
	VFNG4797	0.0427003	0.0669284	0.0511608	0	1.53321	0.0819245	--	hypothetical protein VITISV_007944 [Vitis vinifera]
	VFNG4661	0	0.131302	0	0	1.41335	0	--	hypothetical protein JCGZ_15014 [Jatropha curcas]
	VFNG454	0.0419643	0	0	0	1.24909	0	Cytochrome P450 71D8 GN=CYP71D8 OS=Glycine max (Soybean) PE=2 SV=1	hypothetical protein JCGZ_02823 [Jatropha curcas]
	VFNG3967	0.698152	0.308482	0.456276	0.597059	5.53723	2.63338	--	PREDICTED: uncharacterized protein LOC104594726 [Nelumbo nucifera]
	VFNG3922	0.764676	0.489078	0.996901	0.703878	3.23884	0.713728	--	unnamed protein product [Vitis vinifera]
	VFNG3748	0.0256086	0.0193926	0	0.121828	1.08711	0.0646495	Endonuclease OS=Nicotiana tabacum (Common tobacco) PE=2 SV=1	retrotransposon protein, putative, Ty1-copia subclass [Oryza sativa Japonica Group]
	VFNG3741	0.933741	0.242912	0.260318	0.56527	2.34593	0.190583	--	PREDICTED: uncharacterized protein LOC102666007 [Glycine max]
	VFNG3532	0.11503	0.283432	0.193724	0.0585967	1.20576	7.38173e-07	--	hypothetical protein JCGZ_20190 [Jatropha curcas]
	VFNG3335	0.087644	0.0473073	0.151783	0.152499	2.0232	0.63142	Probable LRR receptor-like serine/threonine-protein kinase RFK1 (Precursor) GN=RKF1 OS=Arabidopsis thaliana (Mouse-ear cress) PE=1 SV=1	hypothetical protein JCGZ_25363 [Jatropha curcas]
	VFNG3143	0.232221	0.133251	0.0295962	0.12481	7.7119	0.267972	Probable LRR receptor-like serine/threonine-protein kinase At3g47570 (Precursor) GN=At3g47570 OS=Arabidopsis thaliana (Mouse-ear cress) PE=2 SV=1	serine-threonine protein kinase, plant-type, putative [Ricinus communis]
	VFNG3139	0.21838	0.0302807	0.00686283	0.423174	2.15068	0.0824039	Endonuclease OS=Nicotiana tabacum (Common tobacco) PE=2 SV=1	hypothetical protein VITISV_015109 [Vitis vinifera]
	VFNG3001	0.0212564	0.127145	0.162055	0.13168	3.66355	0.625472	Putative disease resistance RPP13-like protein 1 GN=RPPL1 OS=Arabidopsis thaliana (Mouse-ear cress) PE=3 SV=1	leucine-rich repeat-containing protein, putative [Ricinus communis]
	VFNG3000	6.27649	4.55679	5.51589	5.12929	40.3465	3.60537	Putative disease resistance protein At4g11170 GN=At4g11170 OS=Arabidopsis thaliana (Mouse-ear cress) PE=2 SV=1	PREDICTED: TMV resistance protein N-like [Pyrus x bretschneideri]
	VFNG2832	0.414512	0.393454	0.186663	0.48169	1.03633	0.290001	--	conserved hypothetical protein [Ricinus communis]
	VFNG267	0.055916	0	0	0.536046	1.62406	0.107236	--	PREDICTED: uncharacterized protein LOC101265754 [Solanum lycopersicum]
	VFNG261	0.293784	0.075897	0.0693885	0.595345	1.83737	0.60306	E3 ubiquitin-protein ligase At3g02290 OS=Arabidopsis thaliana (Mouse-ear cress) PE=2 SV=1	hypothetical protein JCGZ_15743 [Jatropha curcas]
	VFNG2501	0	0.0601615	0	0	3.13051	0.851769	--	hypothetical protein JCGZ_02516 [Jatropha curcas]
	VFNG2382	0	0	0.083556	0	1.65833	0	Probable LRR receptor-like serine/threonine-protein kinase At1g53420 (Precursor) GN=At1g53420 OS=Arabidopsis thaliana (Mouse-ear cress) PE=2 SV=2	hypothetical protein JCGZ_25367 [Jatropha curcas]
	VFNG2263	0.308171	0.576217	0.76154	0.778235	6.37223	0.660606	Glutathione S-transferase U8 GN=GSTU8 OS=Arabidopsis thaliana (Mouse-ear cress) PE=2 SV=1	PREDICTED: probable glutathione S-transferase [Populus euphratica]
	VFNG1928	0.0431686	0	0.0194094	0.0382031	3.16451	0.165971	--	PREDICTED: uncharacterized protein LOC104092367 [Nicotiana tomentosiformis]
	VFNG1826	0.0119398	0.0096787	0	0.150332	1.08359	0	Endonuclease OS=Nicotiana tabacum (Common tobacco) PE=2 SV=1	hypothetical protein VITISV_010209 [Vitis vinifera]
	VFNG1235	0	0	0.0113522	0.0248567	2.1242	0	Endonuclease OS=Nicotiana tabacum (Common tobacco) PE=2 SV=1	PREDICTED: uncharacterized protein LOC101211570 [Cucumis sativus]
X3-specific	VF28356	1.39281	6.46316	2.82046	1.10472	2.91341	21.1796	Inorganic pyrophosphatase 2 GN=At1g17710 OS=Arabidopsis thaliana (Mouse-ear cress) PE=2 SV=1	hypothetical protein JCGZ_07682 [Jatropha curcas]
	VF28330	0	0	0	0	0	8.27512	Protein RALF-like 9 (Precursor) GN=RALFL9 OS=Arabidopsis thaliana (Mouse-ear cress) PE=3 SV=1	conserved hypothetical protein [Ricinus communis]
	VF28282	0.276557	0.354043	0.238356	0.347869	0	1.70659	--	hypothetical protein JCGZ_26481 [Jatropha curcas]
	VF28279	0.251427	0.741276	0.415911	0.99319	2.2196	14.4048	Probable polyol transporter 6 GN=PLT6 OS=Arabidopsis thaliana (Mouse-ear cress) PE=2 SV=2	hypothetical protein JCGZ_20028 [Jatropha curcas]
	VF28265	0.250121	1.21649	0.884111	0.405215	0.897382	3.48496	--	hypothetical protein JCGZ_05400 [Jatropha curcas]
	VF28241	20.7405	14.5293	8.97852	28.5661	21.9656	62.9533	GABA transporter 1 GN=T23G18.9 OS=Arabidopsis thaliana (Mouse-ear cress) PE=1 SV=1	amino acid transporter, putative [Ricinus communis]
	VF28233	0.677416	0.868135	0.798397	0.555105	0.439196	2.94634	LRR receptor-like serine/threonine-protein kinase EFR (Precursor) GN=EFR OS=Arabidopsis thaliana (Mouse-ear cress) PE=1 SV=1	hypothetical protein JCGZ_11256 [Jatropha curcas]
	VF28223	1.94405	0.488988	1.08184	7.04648	2.31048	112.3	Fructose-bisphosphate aldolase cytoplasmic isozyme OS=Oryza sativa subsp. japonica (Rice) PE=1 SV=2	hypothetical protein JCGZ_11264 [Jatropha curcas]
	VF28198	1.79566	2.93553	3.07526	1.00493	2.14922	12.5563	Cytochrome P450 89A2 GN=F13O11.20 OS=Arabidopsis thaliana (Mouse-ear cress) PE=2 SV=2	cytochrome P450, putative [Ricinus communis]
	VF28182	0.0932983	0	0.0364165	0	0	16.401	Peroxidase 65 (Precursor) GN=MQD22.14 OS=Arabidopsis thaliana (Mouse-ear cress) PE=2 SV=2	Peroxidase 65 precursor, putative [Ricinus communis]
	VF28153	9.01259	8.06364	7.5043	6.29253	5.66324	33.6386	Crocetin glucosyltransferase 3 GN=GLT3 OS=Crocus sativus (Saffron) PE=1 SV=1	hypothetical protein JCGZ_23827 [Jatropha curcas]
	VF28108	2.38132	1.5525	1.9893	2.30333	2.93403	12.4088	Protein SUPPRESSOR OF GENE SILENCING 3 GN=SGS3 OS=Solanum lycopersicum (Tomato) PE=1 SV=1	hypothetical protein JCGZ_05052 [Jatropha curcas]
	VF28103	0.126432	0.0325225	0.0738914	0.179355	0.0796216	238.193	Pectinesterase 45 GN=F4I10.160 OS=Arabidopsis thaliana (Mouse-ear cress) PE=2 SV=1	Pectinesterase-4 precursor, putative [Ricinus communis]
	VF28102	4.16148e-07	0.0630886	0.0686457	0.0439857	0.0275297	1.10613	Pectinesterase 28 GN=F14I23.30 OS=Arabidopsis thaliana (Mouse-ear cress) PE=2 SV=1	hypothetical protein JCGZ_16918 [Jatropha curcas]
	VF28083	2.00343	1.02024	0.768765	0.756259	1.64023	7.35495	--	hypothetical protein JCGZ_23690 [Jatropha curcas]
	VF28050	1.73042	3.2604	3.05312	2.31893	3.35139	13.7428	--	hypothetical protein JCGZ_07255 [Jatropha curcas]
	VF28021	7.47679	19.7986	6.45294	22.1487	30.4765	68.5409	--	hypothetical protein JCGZ_07230 [Jatropha curcas]
	VF28007	0	0.169616	0.140904	0.0429332	0.398235	1.21461	--	conserved hypothetical protein [Ricinus communis]
	VF28003	1.55275	0.876152	0.485497	0	0.890402	18.8004	--	hypothetical protein JCGZ_07216 [Jatropha curcas]
	VF27999	0.0670626	0.0504541	1.3757	0.30626	32.7524	202.209	Protein ECERIFERUM 26-like GN=CER26L OS=Arabidopsis thaliana (Mouse-ear cress) PE=2 SV=1	transferase, putative [Ricinus communis]
	VF27998	0.02267	0.0884141	0.0983365	0.222287	0.477377	9.01918	--	conserved hypothetical protein [Ricinus communis]
	VF27994	30.3248	43.9504	46.8659	33.9083	43.3854	96.5078	--	hypothetical protein JCGZ_07207 [Jatropha curcas]
	VF27989	0	0.09137	0.623457	0.292123	0.0909835	31.3802	EG45-like domain containing protein (Precursor) GN=CjBAp12 OS=Citrus jambhiri (Rough lemon) PE=1 SV=1	hypothetical protein JCGZ_07202 [Jatropha curcas]
	VF27987	3.24273	0.482488	0.440132	3.06917	2.2712	13.1574	Probable boron transporter 6 GN=BOR6 OS=Arabidopsis thaliana (Mouse-ear cress) PE=2 SV=2	hypothetical protein JCGZ_07200 [Jatropha curcas]
	VF27866	0	0	0	0	0.192337	23.5404	--	hypothetical protein JCGZ_24097 [Jatropha curcas]
	VF27852	0.296412	0.345819	0.172951	0.516132	0.159589	24.6285	Basic leucine zipper 34 GN=BZIP34 OS=Arabidopsis thaliana (Mouse-ear cress) PE=1 SV=1	PREDICTED: basic leucine zipper 34 isoform X2 [Nicotiana tomentosiformis]
	VF27835	0	0	0	0	0	1.22396	Pectinesterase PPME1 (Precursor) GN=T17F3.3 OS=Arabidopsis thaliana (Mouse-ear cress) PE=1 SV=1	Pectinesterase-1 precursor, putative [Ricinus communis]
	VF27750	0	0	0	0	0	21.2275	--	hypothetical protein POPTR_0001s40550g [Populus trichocarpa]
	VF27709	3.29825	4.09125	1.83077	4.71127	3.31788	26.1167	--	hypothetical protein JCGZ_17789 [Jatropha curcas]
	VF27708	0	0	0.117866	0	0	10.8689	--	enzyme inhibitor, putative [Ricinus communis]
	VF27664	12.9824	7.98005	6.85067	18.6592	15.7197	154.517	Carbonic anhydrase, chloroplastic (Precursor) OS=Nicotiana tabacum (Common tobacco) PE=2 SV=1	carbonic anhydrase, putative [Ricinus communis]
	VF27660	0	0	0	0	0	3.04869	--	hypothetical protein POPTR_0014s10420g [Populus trichocarpa]
	VF27658	62.4518	69.4772	102.944	74.5962	61.4446	755.267	Probable polygalacturonase non-catalytic subunit JP650 (Precursor) GN=JP650 OS=Arabidopsis thaliana (Mouse-ear cress) PE=2 SV=2	hypothetical protein JCGZ_17739 [Jatropha curcas]
	VF27643	0.906956	2.28078	3.41255	0.539432	0.625062	9.40008	Probable xyloglucan endotransglucosylase/hydrolase protein 33 (Precursor) GN=XTH33 OS=Arabidopsis thaliana (Mouse-ear cress) PE=2 SV=2	hypothetical protein JCGZ_17724 [Jatropha curcas]
	VF27619	0.754565	1.65695	2.51739	0.747916	1.11116	7.93248	Protein TRANSPARENT TESTA 12 GN=F17J16_80 OS=Arabidopsis thaliana (Mouse-ear cress) PE=2 SV=1	hypothetical protein JCGZ_17811 [Jatropha curcas]
	VF27566	0.375302	0.0718905	0.139545	0.071507	0.139204	20.1778	Early nodulin-like protein 1 (Precursor) GN=At2g25060 OS=Arabidopsis thaliana (Mouse-ear cress) PE=1 SV=2	hypothetical protein JCGZ_24881 [Jatropha curcas]
	VF27561	0.659248	0.863321	1.60915	1.03381	0.659301	7.59656	GATA transcription factor 12 GN=GATA12 OS=Arabidopsis thaliana (Mouse-ear cress) PE=2 SV=1	hypothetical protein JCGZ_24875 [Jatropha curcas]
	VF27557	0.621627	0.178544	0.070311	0.401515	0.118598	4.8803	--	hypothetical protein JCGZ_24871 [Jatropha curcas]
	VF27550	8.55505	4.71902	3.1718	12.7806	8.79436	32.0643	ABC transporter G family member 36 GN=F23H11.19 OS=Arabidopsis thaliana (Mouse-ear cress) PE=1 SV=1	hypothetical protein JCGZ_24865 [Jatropha curcas]
	VF27532	199.19	302.478	348.925	185.573	345.728	766.585	Profilin-3 OS=Hevea brasiliensis (Para rubber tree) PE=1 SV=1	RecName: Full=Profilin-3; AltName: Full=Pollen allergen Hev b 8.0201; AltName: Allergen=Hev b 8.0201 [Hevea brasiliensis]
	VF27513	0	0.277017	0.0812382	0	1.76529	11.0728	Probable LRR receptor-like serine/threonine-protein kinase At1g67720 (Precursor) GN=At1g67720 OS=Arabidopsis thaliana (Mouse-ear cress) PE=2 SV=1	hypothetical protein JCGZ_01618 [Jatropha curcas]
	VF27504	0	0.0790245	0.050273	0.253753	0.0368607	4.62368	Protein TRANSPARENT TESTA 12 GN=F17J16_80 OS=Arabidopsis thaliana (Mouse-ear cress) PE=2 SV=1	multidrug resistance pump, putative [Ricinus communis]
	VF27449	0	0	0.186563	0.09607	0.232255	1.05033	Cytosolic sulfotransferase 16 GN=F2P9.3 OS=Arabidopsis thaliana (Mouse-ear cress) PE=1 SV=1	Flavonol 4&apos;-sulfotransferase, putative [Ricinus communis]
	VF27437	4.88352	2.31631	2.11687	2.12989	1.26585	27.3912	Pollen-specific leucine-rich repeat extensin-like protein 3 (Precursor) GN=PEX3 OS=Arabidopsis thaliana (Mouse-ear cress) PE=2 SV=1	PREDICTED: pollen-specific leucine-rich repeat extensin-like protein 3 [Populus euphratica]
	VF27431	1.11651	0.671197	0.583381	0.994415	1.48191	17.1662	Gibberellin 20 oxidase 2 GN=MIO24.5 OS=Arabidopsis thaliana (Mouse-ear cress) PE=2 SV=1	hypothetical protein JCGZ_04895 [Jatropha curcas]
	VF27412	0.626236	0.137598	0.0725399	1.36483	6.0776	26.9644	Alpha-L-fucosidase 2 (Precursor) GN=F10M10.30 OS=Arabidopsis thaliana (Mouse-ear cress) PE=1 SV=1	hypothetical protein JCGZ_16272 [Jatropha curcas]
	VF27389	0	0	0	0.06487	0.240952	3.51615	F-box protein At5g49610 GN=At5g49610 OS=Arabidopsis thaliana (Mouse-ear cress) PE=1 SV=1	PREDICTED: F-box protein At5g03970-like [Prunus mume]
	VF27363	6.84371	4.83266	8.18355	5.10938	4.19265	80.9492	Patellin-4 GN=PATL4 OS=Arabidopsis thaliana (Mouse-ear cress) PE=1 SV=2	hypothetical protein JCGZ_22613 [Jatropha curcas]
	VF27354	0	0.390891	0.367243	0	0.261376	1.7325	Myb-related protein Zm1 OS=Zea mays (Maize) PE=2 SV=1	hypothetical protein JCGZ_22622 [Jatropha curcas]
	VF27346	2.64396	0.946667	1.21802	2.94055	2.64089	13.0167	Probable potassium transporter 13 OS=Oryza sativa subsp. japonica (Rice) PE=2 SV=1	Potassium transporter, putative [Ricinus communis]
	VF27337	3.08907	1.09295	2.98159	4.20385	6.41712	38.8342	Feruloyl CoA ortho-hydroxylase 2 GN=F6&apos;H2 OS=Arabidopsis thaliana (Mouse-ear cress) PE=1 SV=1	hypothetical protein JCGZ_22640 [Jatropha curcas]
	VF27266	0.453401	0.887167	0.663409	0.233556	0.346918	129.531	--	PREDICTED: uncharacterized protein LOC102617902 [Citrus sinensis]
	VF27252	16.0982	17.7022	18.6219	18.2925	18.4401	72.5778	ADP,ATP carrier protein, mitochondrial (Precursor) GN=ANT OS=Solanum tuberosum (Potato) PE=2 SV=1	hypothetical protein JCGZ_25907 [Jatropha curcas]
	VF27244	5.43751	4.2169	3.51355	6.38953	6.05917	14.1063	Aldehyde dehydrogenase family 3 member F1 GN=ALDH3F1 OS=Arabidopsis thaliana (Mouse-ear cress) PE=2 SV=2	hypothetical protein JCGZ_25916 [Jatropha curcas]
	VF27240	0.389995	0.365808	0.471315	0.0872622	0.0821692	1.17462	Transcription factor MYB46 GN=MYB46 OS=Arabidopsis thaliana (Mouse-ear cress) PE=2 SV=1	hypothetical protein JCGZ_25920 [Jatropha curcas]
	VF27234	3.63382	3.56061	2.40666	2.24271	2.95543	8.71105	--	hypothetical protein JCGZ_25926 [Jatropha curcas]
	VF27220	0.260766	0.903671	0.31523	0.33345	0.508258	2.14607	Phospholipase A1-Igamma3, chloroplastic (Precursor) GN=At1g51440 OS=Arabidopsis thaliana (Mouse-ear cress) PE=1 SV=1	hypothetical protein JCGZ_25940 [Jatropha curcas]
	VF27208	2.98496	4.13742	2.83729	5.04449	3.90014	15.7289	--	hypothetical protein POPTR_0009s05540g [Populus trichocarpa]
	VF27162	38.8907	46.9255	49.3885	40.9499	50.4305	104.961	--	protein phosphatase 2C [Hevea brasiliensis]
	VF27154	0.189253	0.0685742	0.105851	0.78622	0.279003	26.8839	--	conserved hypothetical protein [Ricinus communis]
	VF27152	0.982147	1.89561	2.42166	0.534113	1.42026	16.8814	Bidirectional sugar transporter SWEET3 GN=SWEET3 OS=Arabidopsis thaliana (Mouse-ear cress) PE=2 SV=1	hypothetical protein JCGZ_26000 [Jatropha curcas]
	VF27143	0	0	0	0	0	23.5885	Arabinogalactan peptide 20 (Precursor) GN=AGP20 OS=Arabidopsis thaliana (Mouse-ear cress) PE=3 SV=1	hypothetical protein JCGZ_26007 [Jatropha curcas]
	VF27080	0.117175	0.404718	0.165423	0.314802	1.56354	6.03049	Probable serine/threonine-protein kinase At1g01540 GN=At1g01540 OS=Arabidopsis thaliana (Mouse-ear cress) PE=1 SV=2	hypothetical protein JCGZ_26057 [Jatropha curcas]
	VF27063	13.0997	13.5011	9.38112	13.2819	14.615	50.6122	Protein TRANSPARENT TESTA 12 GN=F17J16_80 OS=Arabidopsis thaliana (Mouse-ear cress) PE=2 SV=1	hypothetical protein JCGZ_26074 [Jatropha curcas]
	VF27056	0.0778743	0.365681	0.430462	0.20402	0.770493	3.07815	Putative F-box/kelch-repeat protein At3g46050 GN=At3g46050 OS=Arabidopsis thaliana (Mouse-ear cress) PE=3 SV=1	hypothetical protein JCGZ_24774 [Jatropha curcas]
	VF27028	0	0.11959	0.0450343	0.0689599	0	1.28354	Cytochrome P450 714C1 GN=OsJ_35024 OS=Oryza sativa subsp. japonica (Rice) PE=2 SV=1	hypothetical protein JCGZ_26099 [Jatropha curcas]
	VF27021	1.97653	0.51655	1.49059	0.97358	2.2316	52.0306	Actin-depolymerizing factor 7 GN=ADF7 OS=Arabidopsis thaliana (Mouse-ear cress) PE=2 SV=1	hypothetical protein JCGZ_26107 [Jatropha curcas]
	VF27020	0.852806	2.12237	2.34037	0.849946	1.7301	7.37407	Polygalacturonase inhibitor 1 (Precursor) GN=OJ1019_E02.4 OS=Oryza sativa subsp. japonica (Rice) PE=2 SV=1	serine-threonine protein kinase, plant-type, putative [Ricinus communis]
	VF27018	3.5545	4.40804	3.65838	4.6731	7.11696	16.9554	--	hypothetical protein JCGZ_26109 [Jatropha curcas]
	VF26987	0.161861	0	0.405324	0.544951	0	2.49459	BON1-associated protein 2 GN=F4I18.26 OS=Arabidopsis thaliana (Mouse-ear cress) PE=1 SV=1	PREDICTED: BON1-associated protein 2 [Nelumbo nucifera]
	VF26947	9.49679	0.143641	0.00327825	19.2478	1.78257	181.399	--	hypothetical protein JCGZ_26171 [Jatropha curcas]
	VF26941	1.56746	1.52763	0.945167	1.18738	1.11483	6.83869	Peroxidase 66 (Precursor) GN=MJM18.4 OS=Arabidopsis thaliana (Mouse-ear cress) PE=2 SV=1	Peroxidase 66 precursor, putative [Ricinus communis]
	VF26939	0	0.0922216	0	0.22081	0	3.8324	MADS-box transcription factor 50 OS=Oryza sativa subsp. japonica (Rice) PE=2 SV=1	mads box protein, putative [Ricinus communis]
	VF26928	1.5343	9.50033	6.43875	1.86241	7.38142	51.3906	Bifunctional pinoresinol-lariciresinol reductase GN=PLR_Lc1 OS=Linum corymbulosum (Linum) PE=1 SV=1	PREDICTED: bifunctional pinoresinol-lariciresinol reductase 2 [Vitis vinifera]
	VF26923	0	0.47626	0	0	0.416349	1.26303	--	JHL18I08.2 [Jatropha curcas]
	VF26922	0	0	0	0	0.477672	5.57008	--	ATP-dependent peptidase, putative [Ricinus communis]
	VF26921	0.851573	0.333971	0.453685	0.7676	0.541209	2.63714	Putative clathrin assembly protein At5g35200 GN=At5g35200 OS=Arabidopsis thaliana (Mouse-ear cress) PE=1 SV=1	hypothetical protein JCGZ_04099 [Jatropha curcas]
	VF26918	0.234469	0.401602	0.159309	0.612539	0.697985	2.61942	--	hypothetical protein JCGZ_18154 [Jatropha curcas]
	VF26826	3.65041e-09	0	0.0171291	0.163029	0.072241	2.8784	Xyloglucan galactosyltransferase KATAMARI1 homolog OS=Oryza sativa subsp. japonica (Rice) PE=2 SV=1	hypothetical protein JCGZ_02987 [Jatropha curcas]
	VF26625	0.546829	1.91805	0.0824686	0.393451	0.703416	9.94295	Transcription factor MYB108 GN=F5E6.18 OS=Arabidopsis thaliana (Mouse-ear cress) PE=1 SV=1	hypothetical protein POPTR_0012s05200g [Populus trichocarpa]
	VF26619	3.49169	3.43412	1.66887	6.0166	7.10139	16.7539	--	hypothetical protein JCGZ_05908 [Jatropha curcas]
	VF26602	3.75324	5.30409	5.00488	4.77601	2.98876	12.1683	--	hypothetical protein JCGZ_10716 [Jatropha curcas]
	VF26570	6.28898	8.24493	5.28359	5.13936	11.5059	59.2102	Protein PHLOEM PROTEIN 2-LIKE A9 GN=PP2A9 OS=Arabidopsis thaliana (Mouse-ear cress) PE=2 SV=1	hypothetical protein JCGZ_00140 [Jatropha curcas]
	VF26514	3.91077	4.25843	4.69684	5.68928	15.2398	43.8482	Mannose-6-phosphate isomerase 2 GN=F1O19.12 OS=Arabidopsis thaliana (Mouse-ear cress) PE=1 SV=1	hypothetical protein JCGZ_18357 [Jatropha curcas]
	VF26488	0.32473	0.128103	0.147747	0.348533	0.915799	21.5847	--	hypothetical protein JCGZ_09322 [Jatropha curcas]
	VF26466	0	0	0	0	0	20.2184	--	conserved hypothetical protein [Ricinus communis]
	VF26447	1.28815	0.815896	1.30254	0.548951	2.37989	6.36188	MATE efflux family protein DTX1 GN=F3L12.13 OS=Arabidopsis thaliana (Mouse-ear cress) PE=2 SV=1	hypothetical protein JCGZ_23025 [Jatropha curcas]
	VF26445	0.185158	0.112678	0.109511	0.198261	0.409126	30.1453	UDP-glycosyltransferase 78D2 GN=F2K13.200 OS=Arabidopsis thaliana (Mouse-ear cress) PE=2 SV=1	UDP-glucosyltransferase, putative [Ricinus communis]
	VF26410	0	0	0	0.12652	0.0714033	17.0006	--	hypothetical protein RCOM_1466910 [Ricinus communis]
	VF26399	1.80141	5.59168	3.17141	3.02687	4.69039	16.4578	UDP-glycosyltransferase 89B1 GN=UGT89B1 OS=Arabidopsis thaliana (Mouse-ear cress) PE=2 SV=2	hypothetical protein JCGZ_11773 [Jatropha curcas]
	VF26398	0.194658	0.0211735	0.180519	0.215701	1.14497	2.86279	UDP-glycosyltransferase 89B1 GN=UGT89B1 OS=Arabidopsis thaliana (Mouse-ear cress) PE=2 SV=2	UDP-glucosyltransferase, putative [Ricinus communis]
	VF26365	1.71902	2.17551	2.08303	1.31952	1.52372	42.1414	COBRA-like protein 4 (Precursor) GN=COBL4 OS=Arabidopsis thaliana (Mouse-ear cress) PE=2 SV=2	hypothetical protein JCGZ_11750 [Jatropha curcas]
	VF26311	0	0	0	0.24065	1.10589	4.77093	NAC transcription factor NAM-1 GN=NAM-1 OS=Hordeum vulgare var. distichum (Domesticated barley) PE=3 SV=1	NAC transcription factor 058, partial [Jatropha curcas]
	VF26274	0.054628	0.0909945	0.236378	0.223015	0.165833	7.31445	Probable receptor-like protein kinase At5g61350 (Precursor) GN=At5g61350 OS=Arabidopsis thaliana (Mouse-ear cress) PE=2 SV=1	hypothetical protein JCGZ_11664 [Jatropha curcas]
	VF26236	6.57651	6.22476	3.84982	5.77457	7.4718	24.5958	Codeine O-demethylase GN=CODM OS=Papaver somniferum (Opium poppy) PE=1 SV=1	hypothetical protein JCGZ_06101 [Jatropha curcas]
	VF26190	0.383549	0.081374	0.113814	0	0.165952	813.471	Exopolygalacturonase (Fragment) OS=Oenothera organensis (Evening primrose) PE=2 SV=1	hypothetical protein POPTR_0519s002003g, partial [Populus trichocarpa]
	VF26181	0	0	0.0225674	0.106965	0.323531	1.36434	Cysteine-rich repeat secretory protein 38 (Precursor) GN=CRRSP38 OS=Arabidopsis thaliana (Mouse-ear cress) PE=2 SV=1	hypothetical protein JCGZ_15593 [Jatropha curcas]
	VF26092	22.7142	22.5895	28.4629	16.9933	15.6343	71.8114	Isoflavone reductase homolog OS=Solanum tuberosum (Potato) PE=2 SV=1	pterocarpan reductase-like protein [Linum corymbulosum]
	VF26048	124.074	120.724	103.694	130.612	112.777	314.041	--	lactoylglutathione lyase, putative [Ricinus communis]
	VF26023	0.438233	1.1174	0.863207	0.672135	0.536506	2.77513	Chitinase 4 (Precursor) OS=Oryza sativa subsp. japonica (Rice) PE=2 SV=2	PREDICTED: chitinase 5 [Vitis vinifera]
	VF26017	0	0.060908	0.148921	0.290951	0.266268	8.37703	WAT1-related protein At5g07050 GN=At5g07050 OS=Arabidopsis thaliana (Mouse-ear cress) PE=2 SV=1	PREDICTED: WAT1-related protein At5g07050-like [Populus euphratica]
	VF26010	0.349171	0.0784586	0.435631	0.499387	0.330811	2.98247	--	hypothetical protein JCGZ_21525 [Jatropha curcas]
	VF25968	11.215	10.1212	9.98832	12.1808	10.0336	56.0211	--	hypothetical protein JCGZ_13394 [Jatropha curcas]
	VF25919	0.0178319	0.0871956	0.0330059	1.01585	0.494453	2.514	Type I inositol 1,4,5-trisphosphate 5-phosphatase CVP2 GN=CVP2 OS=Arabidopsis thaliana (Mouse-ear cress) PE=1 SV=2	hypothetical protein JCGZ_24076 [Jatropha curcas]
	VF25704	0.498351	0.781848	0.903777	0.418976	0.874097	3.2886	--	hypothetical protein RCOM_1494490 [Ricinus communis]
	VF25684	0.335367	0	0	0	0	370.13	--	hypothetical protein JCGZ_06266 [Jatropha curcas]
	VF25682	0	0	0	0	0	124.93	--	hypothetical protein JCGZ_06266 [Jatropha curcas]
	VF25681	0.373012	0	0.068018	0	0	306.497	--	hypothetical protein JCGZ_06266 [Jatropha curcas]
	VF25680	0.0434843	0	0.0609694	0.0315307	12.7101	36.3328	--	hypothetical protein JCGZ_06264 [Jatropha curcas]
	VF25635	0.370212	0.16557	0.123262	0.450818	0.341156	33.7628	GDSL esterase/lipase At1g29670 (Precursor) GN=At1g29670 OS=Arabidopsis thaliana (Mouse-ear cress) PE=2 SV=1	hypothetical protein JCGZ_22585 [Jatropha curcas]
	VF25612	19.4045	14.6193	15.8951	19.6108	16.8202	55.0443	Protein STRUBBELIG-RECEPTOR FAMILY 5 (Precursor) GN=SRF5 OS=Arabidopsis thaliana (Mouse-ear cress) PE=2 SV=1	strubbelig receptor, putative [Ricinus communis]
	VF25576	0	0.120124	0	0.0742827	0.0713194	1.05582	Serine carboxypeptidase-like 28 (Precursor) GN=SCPL28 OS=Arabidopsis thaliana (Mouse-ear cress) PE=2 SV=2	hypothetical protein POPTR_0008s04130g [Populus trichocarpa]
	VF25556	158.441	156.834	89.0138	299.497	262.077	826.646	Probable aquaporin PIP2-5, N-terminally processed GN=F28P10.200 OS=Arabidopsis thaliana (Mouse-ear cress) PE=1 SV=1	hypothetical protein JCGZ_20043 [Jatropha curcas]
	VF25535	0.409114	2.76486	2.02238	0.494392	1.28771	8.76248	--	hypothetical protein JCGZ_07818 [Jatropha curcas]
	VF25506	11.7337	7.52314	10.0596	5.96379	8.0874	48.0041	Serine carboxypeptidase-like 51 (Precursor) GN=SCPL51 OS=Arabidopsis thaliana (Mouse-ear cress) PE=2 SV=2	retinoid-inducible serine carboxypeptidase, putative [Ricinus communis]
	VF25505	5.15266	3.4414	1.97553	2.07728	5.02118	10.9939	Serine carboxypeptidase-like 51 (Precursor) GN=SCPL51 OS=Arabidopsis thaliana (Mouse-ear cress) PE=2 SV=2	hypothetical protein JCGZ_05408 [Jatropha curcas]
	VF25504	0.323576	0.640601	0.244213	0.592552	0.450055	1.62511	Uncharacterized protein At3g50808 GN=At3g50808 OS=Arabidopsis thaliana (Mouse-ear cress) PE=4 SV=1	protein with unknown function [Ricinus communis]
	VF25423	4.33319	1.45772	1.70407	4.69898	2.95496	155.319	--	hypothetical protein JCGZ_19475 [Jatropha curcas]
	VF25401	1.2185	4.4047	2.56539	1.696	2.79489	23.3972	--	hypothetical protein JCGZ_03974 [Jatropha curcas]
	VF25365	4.35586	4.73218	4.60037	4.68479	5.372	15.4005	--	hypothetical protein JCGZ_10241 [Jatropha curcas]
	VF25358	2.55337	2.50681	2.52229	1.75843	1.48663	13.096	Fatty-acid-binding protein 1 GN=FAP1 OS=Arabidopsis thaliana (Mouse-ear cress) PE=1 SV=1	hypothetical protein JCGZ_10247 [Jatropha curcas]
	VF25354	0.319701	0.264042	0.230798	0.36704	0.287344	1.63201	U-box domain-containing protein 3 GN=PUB3 OS=Arabidopsis thaliana (Mouse-ear cress) PE=2 SV=2	hypothetical protein JCGZ_10252 [Jatropha curcas]
	VF25258	1.58885	3.079	3.82349	1.21932	1.70573	8.02525	Cellulose synthase-like protein E1 GN=CSLE1 OS=Arabidopsis thaliana (Mouse-ear cress) PE=2 SV=1	hypothetical protein JCGZ_01061 [Jatropha curcas]
	VF25257	0.921107	1.92193	4.63021	1.22417	1.73234	9.75808	Cellulose synthase-like protein E6 GN=P0556A05.32 OS=Oryza sativa subsp. japonica (Rice) PE=2 SV=1	hypothetical protein JCGZ_01060 [Jatropha curcas]
	VF25256	0.288367	0.248744	0.113711	0.18925	0.210712	3.58843	WEB family protein At5g55860 GN=At5g55860 OS=Arabidopsis thaliana (Mouse-ear cress) PE=1 SV=1	hypothetical protein JCGZ_01059 [Jatropha curcas]
	VF25239	1.76899	0.96518	1.50471	1.76306	2.22749	6.81536	Probable pectate lyase 22 (Precursor) GN=At5g63180 OS=Arabidopsis thaliana (Mouse-ear cress) PE=2 SV=1	hypothetical protein JCGZ_01029 [Jatropha curcas]
	VF25232	0.105988	0.323704	0.235394	0.0764715	0.072148	3.37162	Major pollen allergen Bet v 1-J GN=BETV1J OS=Betula pendula (European white birch) PE=1 SV=2	hypothetical protein JCGZ_09815 [Jatropha curcas]
	VF25210	0	0	0.376125	0	0.372692	2.17053	--	UDP-glucuronosyltransferase, putative [Ricinus communis]
	VF25182	8.40371	5.74987	5.58702	4.5185	4.32913	16.8551	Membrane-anchored ubiquitin-fold protein 2 GN=MUB2 OS=Arabidopsis thaliana (Mouse-ear cress) PE=1 SV=1	Membrane-anchored ubiquitin-fold protein 1 precursor isoform 1 [Theobroma cacao]
	VF25159	1.75065	4.44674	7.80758	1.45782	2.72022	19.2164	Lamin-like protein (Precursor) GN=At5g15350 OS=Arabidopsis thaliana (Mouse-ear cress) PE=1 SV=1	hypothetical protein JCGZ_19890 [Jatropha curcas]
	VF25089	1.94109	0.115657	0.760963	1.5646	1.02182	3.92942	Uncharacterized protein At1g05835 (Precursor) GN=At1g05835 OS=Arabidopsis thaliana (Mouse-ear cress) PE=2 SV=1	hypothetical protein JCGZ_26409 [Jatropha curcas]
	VF25057	4.54579	6.92467	8.12886	4.62583	5.36435	18.8678	--	hypothetical protein JCGZ_26440 [Jatropha curcas]
	VF25040	13.2462	0.227674	0.563231	16.7621	21.2298	99.9355	Probable inactive purple acid phosphatase 27 (Precursor) GN=PAP27 OS=Arabidopsis thaliana (Mouse-ear cress) PE=2 SV=1	calcineurin-like phosphoesterase [Manihot esculenta]
	VF25026	0	0	0	0	0	16.1448	--	conserved hypothetical protein [Ricinus communis]
	VF25025	0	0	0	0	0	1.54955	Calcium-binding protein CML37 GN=CML37 OS=Arabidopsis thaliana (Mouse-ear cress) PE=2 SV=1	Polcalcin Jun o, putative [Ricinus communis]
	VF25006	5.40493	4.54632	4.56673	6.84617	6.47719	33.2655	--	hypothetical protein JCGZ_11332 [Jatropha curcas]
	VF25001	0.541692	0.363539	0.160347	0.349872	2.04154	59.0662	Lysine histidine transporter 1 GN=LHT1 OS=Arabidopsis thaliana (Mouse-ear cress) PE=1 SV=1	hypothetical protein JCGZ_11336 [Jatropha curcas]
	VF24980	6.04018	4.3204	5.01293	4.39761	4.93181	44.3849	GDSL esterase/lipase At3g48460 (Precursor) GN=At3g48460 OS=Arabidopsis thaliana (Mouse-ear cress) PE=2 SV=1	Esterase precursor, putative [Ricinus communis]
	VF24928	6.673	2.55397	1.11242	0.729778	55.577	144.769	--	conserved hypothetical protein [Ricinus communis]
	VF24926	0.0219133	0.0712592	0.0526091	0	0.0501941	6.94226	MATE efflux family protein 7 GN=F3L12.9 OS=Arabidopsis thaliana (Mouse-ear cress) PE=2 SV=1	TRANSPARENT TESTA 12 protein, putative [Ricinus communis]
	VF24924	0.444914	0.060827	0	0	0	4.14476	D-xylose-proton symporter-like 2 GN=At5g17010 OS=Arabidopsis thaliana (Mouse-ear cress) PE=1 SV=1	hypothetical protein JCGZ_00566 [Jatropha curcas]
	VF24901	0	0	0	0	0.321566	1.67464	14 kDa proline-rich protein DC2.15 (Precursor) OS=Daucus carota (Wild carrot) PE=2 SV=1	14 kDa proline-rich protein DC2.15 precursor, putative [Ricinus communis]
	VF24886	0	0	0	0	0	1.11363	Lipid transfer protein EARLI 1 (Precursor) GN=EARLI1 OS=Arabidopsis thaliana (Mouse-ear cress) PE=1 SV=1	hypothetical protein JCGZ_20812 [Jatropha curcas]
	VF24878	0	0	1.68228	0	2.81129	5.6415	--	hypothetical protein JCGZ_03387 [Jatropha curcas]
	VF24873	0.547538	1.39795	1.17799	0.420352	0.736473	3.00421	--	hypothetical protein JCGZ_15295 [Jatropha curcas]
	VF24847	22.4934	16.4132	17.2658	29.0826	26.2997	97.5039	Caffeoylshikimate esterase GN=CSE OS=Arabidopsis thaliana (Mouse-ear cress) PE=1 SV=1	hypothetical protein JCGZ_07736 [Jatropha curcas]
	VF24824	1.17034	2.35776	1.2659	1.10727	2.29968	9.13989	Probable glycosyltransferase At5g03795 GN=At5g03795 OS=Arabidopsis thaliana (Mouse-ear cress) PE=3 SV=2	hypothetical protein JCGZ_07718 [Jatropha curcas]
	VF24803	1.26019	4.70721	4.21495	1.42172	3.75422	9.72569	--	hypothetical protein JCGZ_21296 [Jatropha curcas]
	VF24743	11.7149	5.6062	5.46561	8.06626	7.33942	23.6997	Probable tyrosine-protein phosphatase At1g05000 GN=At1g05000 OS=Arabidopsis thaliana (Mouse-ear cress) PE=1 SV=1	hypothetical protein JCGZ_18023 [Jatropha curcas]
	VF24742	0.987788	3.04483	2.21446	0.695138	0.72722	7.56514	CRIB domain-containing protein RIC4 GN=RIC4 OS=Arabidopsis thaliana (Mouse-ear cress) PE=1 SV=1	conserved hypothetical protein [Ricinus communis]
	VF24702	0	0	0.107577	0	0.110473	2.92725	--	conserved hypothetical protein [Ricinus communis]
	VF24655	2.21344	2.21344	1.86933	2.94244	3.63271	9.22802	4-coumarate--CoA ligase-like 9 GN=4CLL9 OS=Arabidopsis thaliana (Mouse-ear cress) PE=1 SV=2	hypothetical protein JCGZ_17928 [Jatropha curcas]
	VF24644	7.80507	7.36544	9.40197	5.89079	5.73187	45.0868	OTU domain-containing protein At3g57810 GN=At3g57810 OS=Arabidopsis thaliana (Mouse-ear cress) PE=2 SV=1	hypothetical protein JCGZ_17936 [Jatropha curcas]
	VF24609	39.6931	52.8919	63.5306	46.9282	89.3451	806.629	--	hypothetical protein JCGZ_17913 [Jatropha curcas]
	VF24562	0.116441	0.0289459	0.0178442	0.186531	1.55037	32.6005	--	Protein fluG, putative [Ricinus communis]
	VF24553	0	0	0	0	0	30.3263	Cytochrome b-c1 complex subunit 6 OS=Solanum tuberosum (Potato) PE=1 SV=2	PREDICTED: cytochrome b-c1 complex subunit 6-like isoform X3 [Populus euphratica]
	VF24534	0	0	0	0	0	4.38852	Protochlorophyllide-dependent translocon component 52, chloroplastic (Precursor) GN=L73G19.30 OS=Arabidopsis thaliana (Mouse-ear cress) PE=1 SV=1	hypothetical protein PRUPE_ppa004005mg [Prunus persica]
	VF24503	17.3843	10.5835	7.89005	23.9874	20.3816	88.3483	Auxin-responsive protein IAA14 OS=Arabidopsis thaliana (Mouse-ear cress) PE=1 SV=2	hypothetical protein JCGZ_02272 [Jatropha curcas]
	VF24478	7.98352	6.2349	10.7376	7.07608	8.20284	37.7175	Calmodulin-like protein 11 GN=CML11 OS=Arabidopsis thaliana (Mouse-ear cress) PE=2 SV=1	PREDICTED: calmodulin-like protein 11 [Eucalyptus grandis]
	VF24449	13.3506	5.37357	2.70343	12.4909	10.3964	36.1441	Leucine-rich repeat extensin-like protein 6 (Precursor) GN=LRX6 OS=Arabidopsis thaliana (Mouse-ear cress) PE=2 SV=1	hypothetical protein JCGZ_02218 [Jatropha curcas]
	VF24445	24.4696	7.62426	7.67634	31.4136	21.547	75.3705	Serine/threonine-protein kinase HT1 GN=HT1 OS=Arabidopsis thaliana (Mouse-ear cress) PE=1 SV=1	hypothetical protein JCGZ_02214 [Jatropha curcas]
	VF24436	0.209477	0.312778	0.0334639	0.0342633	0	256.517	Major pollen allergen Ole e 6 GN=OLE6 OS=Olea europaea (Common olive) PE=1 SV=1	hypothetical protein JCGZ_16274 [Jatropha curcas]
	VF24383	0.350428	0.67267	0.456144	0.24655	0.965927	3.27546	Primary amine oxidase (Precursor) OS=Pisum sativum (Garden pea) PE=1 SV=1	copper/topa quinone amine oxidase precursor family protein [Populus trichocarpa]
	VF24380	0.140622	0.166435	0.197388	0.134372	0.153831	1.70176	G-type lectin S-receptor-like serine/threonine-protein kinase RLK1 (Precursor) GN=RLK1 OS=Arabidopsis thaliana (Mouse-ear cress) PE=2 SV=2	hypothetical protein JCGZ_02160 [Jatropha curcas]
	VF24377	1.07534	1.19108	0.365983	1.56503	4.45653	14.9104	Primary amine oxidase (Precursor; Fragment) OS=Lens culinaris (Lentil) PE=1 SV=3	hypothetical protein JCGZ_22065 [Jatropha curcas]
	VF24303	10.1112	28.8651	39.5792	20.1344	28.2615	89.9324	--	soluble acyl-CoA:diacylglycerol O-acyltransferase [Vernicia fordii]
	VF24288	0.107152	0	0	0	0	32.6736	Probable xyloglucan endotransglucosylase/hydrolase protein 23 (Precursor) GN=F14M19.90 OS=Arabidopsis thaliana (Mouse-ear cress) PE=2 SV=1	hypothetical protein JCGZ_08703 [Jatropha curcas]
	VF24272	20.6493	20.2002	17.0817	17.7227	18.5565	270.653	--	hypothetical protein JCGZ_20624 [Jatropha curcas]
	VF24269	0.392244	0.0172464	0	0.680684	0.185215	12.2048	Remorin OS=Solanum tuberosum (Potato) PE=1 SV=1	hypothetical protein JCGZ_20621 [Jatropha curcas]
	VF24258	0.844065	0.59652	0.580373	1.02109	1.18974	9.85412	Probable copper-transporting ATPase HMA5 GN=HMA5 OS=Arabidopsis thaliana (Mouse-ear cress) PE=1 SV=2	copper-transporting atpase p-type, putative [Ricinus communis]
	VF24215	0.107363	0.0245834	0.066069	0	0	4.68808	Short-chain dehydrogenase TIC 32, chloroplastic GN=TIC32 OS=Arabidopsis thaliana (Mouse-ear cress) PE=2 SV=1	short-chain dehydrogenase, putative [Ricinus communis]
	VF24212	1.65311	0.511852	0.788731	1.05038	0.624424	18.7953	Cytochrome P450 86A8 GN=F4I18.5 OS=Arabidopsis thaliana (Mouse-ear cress) PE=2 SV=1	hypothetical protein JCGZ_20573 [Jatropha curcas]
	VF24192	2.37399	1.4684	2.56115	2.19847	2.78405	6.84226	Homeobox protein BEL1 homolog GN=MYC6.12 OS=Arabidopsis thaliana (Mouse-ear cress) PE=1 SV=2	hypothetical protein JCGZ_20555 [Jatropha curcas]
	VF24185	0.709779	3.66022	2.34442	0.607827	2.27093	15.7768	Beta-carotene 3-hydroxylase 1, chloroplastic (Precursor) GN=L73G19.80 OS=Arabidopsis thaliana (Mouse-ear cress) PE=1 SV=1	hypothetical protein JCGZ_20550 [Jatropha curcas]
	VF24183	0.777895	2.21815	9.65241	0.5369	4.36088	26.7212	Protein SPIRAL1-like 5 GN=SP1L5 OS=Arabidopsis thaliana (Mouse-ear cress) PE=2 SV=1	hypothetical protein JCGZ_20549 [Jatropha curcas]
	VF24167	1.63858	13.9842	0.180896	1.03223	6.25239	82.2909	Endoglucanase (Precursor) OS=Phaseolus vulgaris (Kidney bean) PE=2 SV=2	hypothetical protein JCGZ_20535 [Jatropha curcas]
	VF24153	0.0575236	0.007968	0.0217436	0	0.749857	88.7009	--	hypothetical protein JCGZ_20522 [Jatropha curcas]
	VF24136	0.0903245	0.405141	0.208381	0	1.2994	2.83548	Disease resistance response protein 206 (Precursor) GN=PI206 OS=Pisum sativum (Garden pea) PE=2 SV=2	Disease resistance response protein, putative [Ricinus communis]
	VF24134	1.89909	3.37578	4.52276	2.03689	2.1547	12.7168	Cation/H(+) antiporter 18 GN=CHX18 OS=Arabidopsis thaliana (Mouse-ear cress) PE=2 SV=1	hypothetical protein JCGZ_20508 [Jatropha curcas]
	VF24132	11.9104	15.7018	15.5647	12.0242	11.4122	36.0035	Uncharacterized protein At5g41620 GN=At5g41620 OS=Arabidopsis thaliana (Mouse-ear cress) PE=2 SV=2	hypothetical protein JCGZ_20506 [Jatropha curcas]
	VF24120	8.4456	3.58623	2.65962	14.5076	6.513	84.9958	Putative glucose-6-phosphate 1-epimerase OS=Cenchrus ciliaris (Buffelgrass) PE=2 SV=1	hypothetical protein JCGZ_20496 [Jatropha curcas]
	VF24117	0.79994	1.67177	1.07181	0.367584	1.05483	16.9406	Uncharacterized membrane protein At1g06890 GN=At1g06890 OS=Arabidopsis thaliana (Mouse-ear cress) PE=1 SV=1	hypothetical protein JCGZ_05504 [Jatropha curcas]
	VF24070	0.105472	0.228859	0	0.0338381	0.221133	1.45094	MATE efflux family protein 8 GN=F3L12.8 OS=Arabidopsis thaliana (Mouse-ear cress) PE=3 SV=2	hypothetical protein JCGZ_09284 [Jatropha curcas]
	VF24057	0.0275098	0	0	0	0	4.21063	Probable carotenoid cleavage dioxygenase 4, chloroplastic (Precursor) GN=T18B16.140 OS=Arabidopsis thaliana (Mouse-ear cress) PE=1 SV=1	hypothetical protein POPTR_0009s15400g [Populus trichocarpa]
	VF24036	0.230773	0.096898	0.0301748	0.116075	0.489891	1.69541	Fe(2+) transport protein 1 (Precursor) OS=Oryza sativa subsp. japonica (Rice) PE=2 SV=1	hypothetical protein JCGZ_11803 [Jatropha curcas]
	VF24024	0.0107723	0	0	0.200296	3.23622	26.3607	--	hypothetical protein JCGZ_11824 [Jatropha curcas]
	VF24014	0.826564	2.1012	1.23839	1.59354	0.864849	6.48668	--	hypothetical protein JCGZ_18245 [Jatropha curcas]
	VF24004	3.33051	3.76579	2.31474	3.60071	4.3136	12.8803	Probable calcium-binding protein CML15 GN=CML15 OS=Arabidopsis thaliana (Mouse-ear cress) PE=2 SV=1	hypothetical protein POPTR_0010s14280g [Populus trichocarpa]
	VF23999	4.08493	10.4492	13.315	18.5102	16.1698	171.504	Lysine-rich arabinogalactan protein 19 (Precursor) GN=AGP19 OS=Arabidopsis thaliana (Mouse-ear cress) PE=2 SV=2	hypothetical protein JCGZ_18255 [Jatropha curcas]
	VF23937	0	0	0.0318701	0	2.34588	6.051	Inositol transporter 4 GN=INT4 OS=Arabidopsis thaliana (Mouse-ear cress) PE=1 SV=1	hypothetical protein JCGZ_09508 [Jatropha curcas]
	VF23902	4.51287	3.50183	2.15015	4.7061	3.05282	24.4836	MACPF domain-containing protein At1g14780 GN=At1g14780 OS=Arabidopsis thaliana (Mouse-ear cress) PE=2 SV=1	hypothetical protein JCGZ_13113 [Jatropha curcas]
	VF23899	4.77339	21.5654	20.2245	6.38863	27.3205	142.002	Shikimate O-hydroxycinnamoyltransferase GN=HST OS=Nicotiana tabacum (Common tobacco) PE=1 SV=1	hypothetical protein JCGZ_04045 [Jatropha curcas]
	VF23832	2.50055	1.95561	1.7532	1.72248	2.40033	8.87846	--	conserved hypothetical protein [Ricinus communis]
	VF23826	0.432244	2.0056	0.206698	2.1158	0.527688	4.30983	--	hypothetical protein JCGZ_18663 [Jatropha curcas]
	VF23791	1.42213	0.345117	0.370418	1.48127	3.40439	11.007	AP2/ERF and B3 domain-containing transcription factor At1g50680 GN=At1g50680 OS=Arabidopsis thaliana (Mouse-ear cress) PE=2 SV=1	hypothetical protein JCGZ_04019 [Jatropha curcas]
	VF23769	0	0	0.100579	0	0	27.261	--	lipid binding protein, putative [Ricinus communis]
	VF23753	0	0	0.101837	0.397181	0.199408	1.34726	RING-H2 finger protein ATL8 GN=ATL8 OS=Arabidopsis thaliana (Mouse-ear cress) PE=2 SV=2	protein with unknown function [Ricinus communis]
	VF23747	14.7011	17.4209	13.4422	10.2085	25.5453	54.9307	Nucleobase-ascorbate transporter 1 GN=NAT1 OS=Arabidopsis thaliana (Mouse-ear cress) PE=2 SV=1	hypothetical protein JCGZ_13746 [Jatropha curcas]
	VF23700	0	0	0	0	6.36685	15.2631	CLE5p (Precursor) GN=T16B12 OS=Arabidopsis thaliana (Mouse-ear cress) PE=2 SV=2	hypothetical protein JCGZ_12238 [Jatropha curcas]
	VF23680	0.976293	0.314176	0.478472	0.794678	0.537809	105.498	Antimicrobial peptide 2d (Precursor; Fragment) OS=Macadamia integrifolia (Macadamia nut) PE=1 SV=1	hypothetical protein JCGZ_12256 [Jatropha curcas]
	VF23663	20.0651	21.8275	18.0759	29.5131	77.5299	400.575	Calcium uniporter protein 2, mitochondrial (Precursor) OS=Arabidopsis thaliana (Mouse-ear cress) PE=2 SV=1	hypothetical protein JCGZ_12272 [Jatropha curcas]
	VF23581	0.171537	0.232403	0.0630708	0.323555	0.243068	1.15305	Patatin-like protein 3 GN=PLP3 OS=Arabidopsis thaliana (Mouse-ear cress) PE=2 SV=2	hypothetical protein JCGZ_12356 [Jatropha curcas]
	VF23539	0.295825	0.394189	0.525267	0.405442	0.476695	1.65893	Microtubule-associated protein 70-5 OS=Arabidopsis thaliana (Mouse-ear cress) PE=1 SV=1	hypothetical protein JCGZ_13685 [Jatropha curcas]
	VF23498	0.475267	0.528099	0.368187	0.913754	1.15089	8.12154	F-box/kelch-repeat protein At5g03020 GN=At5g03020 OS=Arabidopsis thaliana (Mouse-ear cress) PE=2 SV=1	PREDICTED: influenza virus NS1A-binding protein homolog [Prunus mume]
	VF23495	652.55	1061.08	1535.72	1163.83	1387.98	3392.58	Metallothionein-like protein 1 OS=Erythranthe guttata (Yellow monkey flower) PE=3 SV=1	hypothetical protein POPTR_0001s24660g [Populus trichocarpa]
	VF23363	0	1.1647	0.523805	0	0	17.1619	Protein GLUTAMINE DUMPER 3 GN=MRI1.4 OS=Arabidopsis thaliana (Mouse-ear cress) PE=2 SV=1	Glutamine dumper 2, putative [Theobroma cacao]
	VF23337	9.4786	2.71444	5.67602	17.2823	12.319	37.8875	Bidirectional sugar transporter SWEET16 GN=SWEET16 OS=Arabidopsis thaliana (Mouse-ear cress) PE=2 SV=1	hypothetical protein JCGZ_22533 [Jatropha curcas]
	VF23320	0.39024	0.204224	0.384405	0.420875	0.158513	2.26661	Probable beta-D-xylosidase 5 (Precursor) GN=BXL5 OS=Arabidopsis thaliana (Mouse-ear cress) PE=2 SV=2	PREDICTED: beta-xylosidase/alpha-L-arabinofuranosidase 1-like [Pyrus x bretschneideri]
	VF23277	2.56638	1.17883	1.17373	3.41299	5.88633	47.2955	--	hypothetical protein JCGZ_04513 [Jatropha curcas]
	VF23268	1.19532	1.42898	1.82448	0.631432	2.04	5.91777	--	hypothetical protein JCGZ_04521 [Jatropha curcas]
	VF23213	0.384926	0.69039	0.725948	0.523972	0.510828	1.50712	--	conserved hypothetical protein [Ricinus communis]
	VF23163	2.49092	2.68339	1.23304	2.66109	1.65479	13.2638	WRKY transcription factor 6 GN=WRKY6 OS=Arabidopsis thaliana (Mouse-ear cress) PE=1 SV=1	WRKY transcription factor 31 [Jatropha curcas]
	VF23162	11.8842	14.6937	16.2483	11.9174	14.7407	202.213	Aspartic proteinase A1 (Precursor) GN=F12F1.24 OS=Arabidopsis thaliana (Mouse-ear cress) PE=1 SV=1	hypothetical protein JCGZ_21189 [Jatropha curcas]
	VF23146	3.67871	3.24367	2.1003	3.43308	5.622	18.6442	--	hypothetical protein JCGZ_21199 [Jatropha curcas]
	VF23123	0.595495	0.353589	0.334977	0.667337	0.973075	7.67759	Beta-amylase 3, chloroplastic (Precursor) OS=Arabidopsis thaliana (Mouse-ear cress) PE=1 SV=3	hypothetical protein JCGZ_11889 [Jatropha curcas]
	VF23118	15.95	12.62	10.2434	20.3132	20.5242	55.4083	Phosphatidylinositol 4-phosphate 5-kinase 1 GN=F2E2.1 OS=Arabidopsis thaliana (Mouse-ear cress) PE=1 SV=1	PREDICTED: uncharacterized protein LOC105130956 [Populus euphratica]
	VF23096	2.44989	2.65428	2.76443	3.62979	3.18758	11.061	--	hypothetical protein JCGZ_09745 [Jatropha curcas]
	VF23094	33.643	44.2575	38.2098	43.0377	44.2688	239.226	NAP1-related protein 2 GN=F6A14.10 OS=Arabidopsis thaliana (Mouse-ear cress) PE=1 SV=2	hypothetical protein JCGZ_09743 [Jatropha curcas]
	VF23081	0.0547514	0	0	0	0	128.15	Probable pectate lyase 19 (Precursor) GN=At5g15110 OS=Arabidopsis thaliana (Mouse-ear cress) PE=2 SV=1	hypothetical protein JCGZ_09725 [Jatropha curcas]
	VF23057	0.863986	1.01494	0.768147	0.865112	0.950649	3.64253	--	conserved hypothetical protein [Ricinus communis]
	VF23024	4.35697	4.59202	9.43391	4.97591	5.86189	278.628	Protein NRT1/ PTR FAMILY 5.8 GN=NPF5.8 OS=Arabidopsis thaliana (Mouse-ear cress) PE=2 SV=1	hypothetical protein JCGZ_09669 [Jatropha curcas]
	VF22992	0.0350292	0.0320027	0.0267136	0.0871466	0.0817186	2.6179	Putative F-box/kelch-repeat protein At1g15680 GN=At1g15680 OS=Arabidopsis thaliana (Mouse-ear cress) PE=3 SV=1	hypothetical protein ARALYDRAFT_904939 [Arabidopsis lyrata subsp. lyrata]
	VF22975	0.0503436	0.0518383	0.0115427	0	0.0227442	187.779	Hexose carrier protein HEX6 GN=HEX6 OS=Ricinus communis (Castor bean) PE=2 SV=1	hypothetical protein POPTR_0005s09290g [Populus trichocarpa]
	VF22974	0.26727	0.0621568	0.00868651	0.824074	1.57216	43.6011	Monosaccharide-sensing protein 2 GN=MSSP2 OS=Arabidopsis thaliana (Mouse-ear cress) PE=1 SV=2	hypothetical protein JCGZ_22417 [Jatropha curcas]
	VF22970	1.1598	5.98003	1.62459	12.9849	2.37256	35.2084	Subtilisin-like protease SDD1 {ECO:0000303|PubMed:10809670} (Precursor) OS=Arabidopsis thaliana (Mouse-ear cress) PE=2 SV=1	PREDICTED: subtilisin-like protease [Populus euphratica]
	VF22924	0	0	0	0	0	1.57573	Cation/H(+) antiporter 14 GN=CHX14 OS=Arabidopsis thaliana (Mouse-ear cress) PE=2 SV=1	hypothetical protein JCGZ_17366 [Jatropha curcas]
	VF22854	0.504389	0.215115	0.547114	0.245548	0.352496	1.15922	Probable indole-3-pyruvate monooxygenase YUCCA8 GN=F16A16.170 OS=Arabidopsis thaliana (Mouse-ear cress) PE=2 SV=1	hypothetical protein JCGZ_17597 [Jatropha curcas]
	VF22826	1.23977e-58	7.0828e-19	0.0641881	1.11591e-37	4.8205e-07	2.18772	Leucine-rich repeat receptor-like protein kinase PXL2 (Precursor) GN=PXL2 OS=Arabidopsis thaliana (Mouse-ear cress) PE=2 SV=1	Receptor protein kinase CLAVATA1 precursor, putative [Ricinus communis]
	VF22801	3.10727	2.25599	1.81367	2.39716	1.72834	27.3734	Cellulose synthase A catalytic subunit 4 [UDP-forming] GN=MRH10.14 OS=Arabidopsis thaliana (Mouse-ear cress) PE=1 SV=1	hypothetical protein JCGZ_17641 [Jatropha curcas]
	VF22666	76.252	56.5057	57.1898	76.7891	72.2459	156.068	Rac-like GTP-binding protein RHO1 (Precursor) GN=RHO1 OS=Pisum sativum (Garden pea) PE=2 SV=1	hypothetical protein PRUPE_ppa011074mg [Prunus persica]
	VF22661	4.56031	4.85515	1.66654	3.59021	2.78916	11.2141	GDSL esterase/lipase EXL3 (Precursor) GN=EXL3 OS=Arabidopsis thaliana (Mouse-ear cress) PE=2 SV=1	hypothetical protein JCGZ_25376 [Jatropha curcas]
	VF22646	0.291973	0.0893647	0.0388638	0.43477	0.167498	177.301	Probable ADP-ribosylation factor GTPase-activating protein AGD13 GN=AGD13 OS=Arabidopsis thaliana (Mouse-ear cress) PE=2 SV=1	ARF GTPase activator, putative [Ricinus communis]
	VF22639	0	0	0.496773	0.125739	0	2.18664	--	hypothetical protein JCGZ_02942 [Jatropha curcas]
	VF22630	42.1326	45.2664	39.5284	34.0336	95.3185	280.46	Methylsterol monooxygenase 2-2 GN=F22G5.23 OS=Arabidopsis thaliana (Mouse-ear cress) PE=2 SV=1	hypothetical protein JCGZ_02933 [Jatropha curcas]
	VF22623	0.156454	0.0222595	0.0202071	0.351046	1.72728	3.74324	F-box protein At5g49610 GN=At5g49610 OS=Arabidopsis thaliana (Mouse-ear cress) PE=1 SV=1	hypothetical protein PRUPE_ppa024520mg, partial [Prunus persica]
	VF22464	12.7808	7.77396	8.54317	14.2335	14.6209	35.4303	Purple acid phosphatase 15 (Precursor) GN=T1B9.21 OS=Arabidopsis thaliana (Mouse-ear cress) PE=1 SV=1	hypothetical protein JCGZ_17535 [Jatropha curcas]
	VF22462	2.41952	15.626	6.92872	2.316	18.9508	40.3551	--	lipid binding protein, putative [Ricinus communis]
	VF22428	2.41923	2.61731	0.548668	1.52122	1.48434	14.3598	Probable WRKY transcription factor 42 GN=WRKY42 OS=Arabidopsis thaliana (Mouse-ear cress) PE=2 SV=1	WRKY transcription factor, putative [Ricinus communis]
	VF22424	0.424373	0.656612	0.215044	0.342993	2.10457	14.3123	Mitogen-activated protein kinase kinase kinase NPK1 GN=NPK1 OS=Nicotiana tabacum (Common tobacco) PE=1 SV=1	hypothetical protein JCGZ_24448 [Jatropha curcas]
	VF22360	0.42481	0.446868	0.219398	0.793003	0.519374	1.85811	--	hypothetical protein JCGZ_01448 [Jatropha curcas]
	VF22346	0.969308	0.452033	0.481891	1.01626	0.529797	2.12805	Serine/threonine-protein kinase SAPK7 OS=Oryza sativa subsp. japonica (Rice) PE=2 SV=2	hypothetical protein JCGZ_24259 [Jatropha curcas]
	VF22343	3.66579	5.1158	5.96145	4.45731	8.46278	19.9713	Probable arabinosyltransferase ARAD1 GN=ARAD1 OS=Arabidopsis thaliana (Mouse-ear cress) PE=1 SV=1	hypothetical protein JCGZ_22228 [Jatropha curcas]
	VF22335	5.28703	8.22619	5.58179	7.49065	10.1168	49.8596	Protein TRANSPARENT TESTA 12 GN=F17J16_80 OS=Arabidopsis thaliana (Mouse-ear cress) PE=2 SV=1	hypothetical protein JCGZ_02643 [Jatropha curcas]
	VF22325	2.81526	2.70369	2.06404	4.38053	2.23244	9.02865	--	hypothetical protein JCGZ_24913 [Jatropha curcas]
	VF22263	0.120265	0.170321	0.171823	0.148955	0.0714047	1.31258	LRR receptor-like serine/threonine-protein kinase GSO2 (Precursor) GN=K23L20.3 OS=Arabidopsis thaliana (Mouse-ear cress) PE=2 SV=2	hypothetical protein POPTR_0223s00210g [Populus trichocarpa]
	VF22206	0.433779	0.497609	0.917834	1.38226	0.250617	20.4504	Fasciclin-like arabinogalactan protein 12 (Precursor) GN=FLA12 OS=Arabidopsis thaliana (Mouse-ear cress) PE=2 SV=2	hypothetical protein JCGZ_05548 [Jatropha curcas]
	VF22205	0	0.201342	0.63684	0.0976155	0.0454923	32.123	Fasciclin-like arabinogalactan protein 12 (Precursor) GN=FLA12 OS=Arabidopsis thaliana (Mouse-ear cress) PE=2 SV=2	conserved hypothetical protein [Ricinus communis]
	VF22197	2.79815	5.0169	6.27557	3.73318	3.93381	12.7919	Fasciclin-like arabinogalactan protein 12 (Precursor) GN=FLA12 OS=Arabidopsis thaliana (Mouse-ear cress) PE=2 SV=2	hypothetical protein JCGZ_05539 [Jatropha curcas]
	VF22135	2.13604	8.46343	2.18473	6.83455	9.43205	28.2657	Benzoate carboxyl methyltransferase GN=BAMT OS=Antirrhinum majus (Garden snapdragon) PE=1 SV=1	Benzoate carboxyl methyltransferase, putative [Ricinus communis]
	VF22088	2.95732	9.052	31.7014	8.23793	2.92295	66.7438	--	hypothetical protein JCGZ_16975 [Jatropha curcas]
	VF22024	0.077224	0.0315896	0	0	0.0258567	3.57964	Leucine-rich repeat extensin-like protein 4 (Precursor) GN=LRX4 OS=Arabidopsis thaliana (Mouse-ear cress) PE=2 SV=1	hypothetical protein JCGZ_23006 [Jatropha curcas]
	VF21984	4.87951	1.2458	1.99684	7.40003	13.4427	33.2702	Transcription factor HBP-1b(c1) (Fragment) OS=Triticum aestivum (Wheat) PE=1 SV=2	hypothetical protein JCGZ_25510 [Jatropha curcas]
	VF21933	6.62687	9.43086	6.99961	6.70556	4.40141	29.0534	Probable xyloglucan endotransglucosylase/hydrolase protein 6 (Precursor) GN=MPA24.8 OS=Arabidopsis thaliana (Mouse-ear cress) PE=2 SV=2	hypothetical protein JCGZ_12592 [Jatropha curcas]
	VF21925	1.30639	0.357721	0.462611	1.33313	1.47274	19.2248	--	hypothetical protein JCGZ_12599 [Jatropha curcas]
	VF21909	3.32154	12.6653	11.8866	5.78801	8.54239	55.0468	Phosphoenolpyruvate carboxykinase [ATP] GN=PCKA OS=Arabidopsis thaliana (Mouse-ear cress) PE=1 SV=1	hypothetical protein JCGZ_12613 [Jatropha curcas]
	VF21870	0.026441	0.0206552	0.0704005	0.0896084	0.270032	3.24654	Cation/H(+) antiporter 28 GN=CHX28 OS=Arabidopsis thaliana (Mouse-ear cress) PE=2 SV=2	hypothetical protein JCGZ_16778 [Jatropha curcas]
	VF21854	9.49898	10.2236	8.545	7.81214	6.77242	50.4124	Polyamine oxidase 1 GN=MSH12.17 OS=Arabidopsis thaliana (Mouse-ear cress) PE=1 SV=1	polyamine oxidase, putative [Ricinus communis]
	VF21819	0.998053	0.528833	0.306818	0.865704	4.08996	40.5294	Serine carboxypeptidase-like 40 (Precursor) GN=SCPL40 OS=Arabidopsis thaliana (Mouse-ear cress) PE=2 SV=2	unnamed protein product [Vitis vinifera]
	VF21778	0.502907	0.196929	0.154767	0.435133	0.25119	199.715	ATPase 9, plasma membrane-type GN=AHA9 OS=Arabidopsis thaliana (Mouse-ear cress) PE=2 SV=2	hypothetical protein JCGZ_27018 [Jatropha curcas]
	VF21777	0.643429	3.171	7.39913	1.10688	4.02876	21.5975	Ethylene-responsive transcription factor ERF003 GN=ERF003 OS=Arabidopsis thaliana (Mouse-ear cress) PE=2 SV=1	hypothetical protein JCGZ_27017 [Jatropha curcas]
	VF21681	0	0	0	0	0.221089	10.273	--	hypothetical protein JCGZ_08010 [Jatropha curcas]
	VF21644	0	0	0	0	2.6943	270.687	--	hypothetical protein JCGZ_08044 [Jatropha curcas]
	VF21603	0.14767	0.290714	0.0524809	0.0809283	0.046911	4.15637	U-box domain-containing protein 15 GN=PUB15 OS=Arabidopsis thaliana (Mouse-ear cress) PE=2 SV=2	hypothetical protein JCGZ_08083 [Jatropha curcas]
	VF21576	1.08308	2.62509	3.10039	0.595222	1.48244	9.08643	--	hypothetical protein JCGZ_08120 [Jatropha curcas]
	VF21545	1.72016	2.0696	1.4211	2.00025	4.33497	14.2298	--	Late embryogenesis abundant protein-related / LEA protein-related, putative [Theobroma cacao]
	VF21529	0.290089	1.08861	0.537679	1.35127	0.516585	3.09837	Uncharacterized protein At1g76070 GN=At1g76070 OS=Arabidopsis thaliana (Mouse-ear cress) PE=1 SV=1	hypothetical protein JCGZ_08163 [Jatropha curcas]
	VF21521	1.31183	1.43302	0.663982	1.38742	4.33988	13.5163	Probable nucleoredoxin 2 OS=Oryza sativa subsp. japonica (Rice) PE=2 SV=1	hypothetical protein JCGZ_08169 [Jatropha curcas]
	VF21507	0.973512	0.130037	0.0988326	2.12713	2.17764	8.67465	Probable BOI-related E3 ubiquitin-protein ligase 2 GN=BRG2 OS=Arabidopsis thaliana (Mouse-ear cress) PE=1 SV=1	JHL20J20.10 [Jatropha curcas]
	VF21491	0.214875	1.24457	1.09586	1.85712	2.19198	5.17301	--	hypothetical protein JCGZ_08198 [Jatropha curcas]
	VF21489	0.198034	0.532774	0.984806	0.231241	0.978476	1.98717	Thaumatin-like protein (Precursor) GN=At1g18250 OS=Arabidopsis thaliana (Mouse-ear cress) PE=2 SV=2	hypothetical protein JCGZ_08200 [Jatropha curcas]
	VF21466	2.28147	3.47728	3.51909	1.73668	2.07733	9.97638	WEB family protein At1g75720 GN=At1g75720 OS=Arabidopsis thaliana (Mouse-ear cress) PE=2 SV=1	hypothetical protein JCGZ_08222 [Jatropha curcas]
	VF21437	0.312638	0.0290602	0.0364379	0.0912965	0	317.957	Sugar transport protein 8 GN=STP8 OS=Arabidopsis thaliana (Mouse-ear cress) PE=2 SV=2	hypothetical protein JCGZ_02150 [Jatropha curcas]
	VF21402	1.1835	7.21109	6.8185	0.890247	3.69138	25.6257	Glucose and ribitol dehydrogenase GN=CAISE5 OS=Daucus carota (Wild carrot) PE=2 SV=1	hypothetical protein JCGZ_02128 [Jatropha curcas]
	VF21390	30.6933	79.2408	112.505	38.6592	80.8461	339.052	Stem-specific protein TSJT1 GN=TSJT1 OS=Nicotiana tabacum (Common tobacco) PE=2 SV=1	Stem-specific protein TSJT1, putative [Ricinus communis]
	VF21324	0.160703	0.627907	0.295492	0.242675	0.459891	2.05989	--	hypothetical protein JCGZ_02057 [Jatropha curcas]
	VF21323	1.45793	6.78209	3.22214	0.401641	2.06297	191.021	--	hypothetical protein JCGZ_02056 [Jatropha curcas]
	VF21287	0.829591	4.40329	2.09446	1.38557	4.76347	20.7492	CASP-like protein 1D1 GN=RCOM_0679870 OS=Ricinus communis (Castor bean) PE=2 SV=1	hypothetical protein JCGZ_02018 [Jatropha curcas]
	VF21286	8.15553	12.6277	7.41693	13.182	9.72492	45.4595	CASP-like protein 1E1 GN=RCOM_0680180 OS=Ricinus communis (Castor bean) PE=2 SV=1	conserved hypothetical protein [Ricinus communis]
	VF21278	0	0	0.694195	0.237678	0.77801	2.29537	Monothiol glutaredoxin-S10 GN=MHC9.13 OS=Arabidopsis thaliana (Mouse-ear cress) PE=3 SV=1	hypothetical protein JCGZ_02010 [Jatropha curcas]
	VF21261	0.0950605	0.0143062	0	0.0889341	0.0121402	53.9677	Potassium transporter 20 OS=Oryza sativa subsp. japonica (Rice) PE=2 SV=1	hypothetical protein JCGZ_01993 [Jatropha curcas]
	VF21249	8.59858	11.3669	12.4391	9.68819	13.3126	26.7007	--	hypothetical protein JCGZ_12114 [Jatropha curcas]
	VF21239	5.19674	5.55661	17.1748	6.70724	15.4956	39.2746	Metal transporter Nramp5 GN=OJ1057_E05.110 OS=Oryza sativa subsp. japonica (Rice) PE=2 SV=1	PREDICTED: metal transporter Nramp5-like [Populus euphratica]
	VF21235	0.858959	0.504421	0.612161	0.991945	1.27224	11.054	Beta-galactosidase 16 (Precursor) GN=BGAL16 OS=Arabidopsis thaliana (Mouse-ear cress) PE=2 SV=2	PREDICTED: beta-galactosidase 16-like [Populus euphratica]
	VF21230	0.941959	0.0164053	0.0273794	1.8166	0.27229	11.785	Protein NRT1/ PTR FAMILY 7.1 GN=NPF7.1 OS=Arabidopsis thaliana (Mouse-ear cress) PE=2 SV=1	hypothetical protein JCGZ_16932 [Jatropha curcas]
	VF21081	13.203	11.8578	14.7244	11.4008	11.492	31.4372	Tobamovirus multiplication protein 1 GN=TOM1 OS=Nicotiana tabacum (Common tobacco) PE=1 SV=1	virion binding protein, putative [Ricinus communis]
	VF21070	0	0	0	0.0201909	0.0441952	19.8183	Proline-rich receptor-like protein kinase PERK4 GN=PERK4 OS=Arabidopsis thaliana (Mouse-ear cress) PE=1 SV=1	hypothetical protein JCGZ_10083 [Jatropha curcas]
	VF21053	42.3604	42.0783	36.073	57.1637	60.6965	137.339	Polyol transporter 5 GN=PLT5 OS=Arabidopsis thaliana (Mouse-ear cress) PE=1 SV=2	sugar transporter, putative [Ricinus communis]
	VF21036	0.0893142	0.494362	0.698828	0.371488	2.19236	6.14277	--	--
	VF21024	1.90185	1.02902	1.29056	2.27112	1.69742	7.14662	Probable serine/threonine-protein kinase At1g18390 (Precursor) GN=At1g18390 OS=Arabidopsis thaliana (Mouse-ear cress) PE=2 SV=2	hypothetical protein JCGZ_13013 [Jatropha curcas]
	VF20973	0.572962	0.405924	0.0931336	0.457923	0.494203	1.85272	Mitochondrial pyruvate carrier 1 {ECO:0000305} OS=Arabidopsis thaliana (Mouse-ear cress) PE=3 SV=1	hypothetical protein JCGZ_10158 [Jatropha curcas]
	VF20896	22.0535	21.5036	24.2596	22.8871	29.256	61.6194	Alpha-L-arabinofuranosidase 1 (Precursor) GN=T7M13.18 OS=Arabidopsis thaliana (Mouse-ear cress) PE=1 SV=1	hypothetical protein JCGZ_10878 [Jatropha curcas]
	VF20892	52.5132	41.7457	32.0704	52.4262	48.3262	106.059	Probable polyamine oxidase 4 GN=PAO4 OS=Arabidopsis thaliana (Mouse-ear cress) PE=1 SV=1	hypothetical protein JCGZ_10475 [Jatropha curcas]
	VF20851	6.19165e-07	0.368177	0.243765	0.0710085	0	7.08828	--	hypothetical protein JCGZ_03477 [Jatropha curcas]
	VF20844	0	0	0	0	0	1.31916	Polygalacturonase (Precursor) OS=Prunus persica (Peach) PE=2 SV=1	Polygalacturonase precursor, putative [Ricinus communis]
	VF20836	1.54632	1.16948	0.697809	2.04267	1.75089	34.7642	Putative glucose-6-phosphate 1-epimerase OS=Cenchrus ciliaris (Buffelgrass) PE=2 SV=1	hypothetical protein JCGZ_03495 [Jatropha curcas]
	VF20813	0	0	0	0	0	36.6645	--	21 kDa protein precursor, putative [Ricinus communis]
	VF20802	0.247711	0.18777	0.123024	0.22567	0.477937	3.50248	Probable sugar phosphate/phosphate translocator At3g11320 GN=At3g11320 OS=Arabidopsis thaliana (Mouse-ear cress) PE=2 SV=1	hypothetical protein JCGZ_08538 [Jatropha curcas]
	VF20776	0.854689	2.71083	2.04448	0.444762	2.07587	41.0673	Laccase-4 (Precursor) GN=F16M14.1 OS=Arabidopsis thaliana (Mouse-ear cress) PE=2 SV=2	hypothetical protein JCGZ_08506 [Jatropha curcas]
	VF20770	0.126249	0.0447717	0.244995	0.120435	18.2589	245.457	Sugar transport protein 8 GN=STP8 OS=Arabidopsis thaliana (Mouse-ear cress) PE=2 SV=2	hypothetical protein JCGZ_08503 [Jatropha curcas]
	VF20769	8.80663	12.9921	17.6496	11.355	34.2645	77.6563	Sugar transport protein 2 GN=STP2 OS=Arabidopsis thaliana (Mouse-ear cress) PE=1 SV=3	sugar transporter, putative [Ricinus communis]
	VF20768	0.344677	0.0979354	1.44968	0.486283	0.42814	3.55909	--	hypothetical protein JCGZ_08501 [Jatropha curcas]
	VF20721	3.45274	3.48269	4.18589	4.86514	3.5728	10.6134	--	hypothetical protein JCGZ_22451 [Jatropha curcas]
	VF20695	5.90275	0.0905635	0.186736	15.7365	1.72882	39.2961	Early nodulin-like protein 1 (Precursor) GN=At2g25060 OS=Arabidopsis thaliana (Mouse-ear cress) PE=1 SV=2	Mavicyanin, putative [Ricinus communis]
	VF20597	0	0	0.274595	0	21.4903	136.435	Non-specific lipid-transfer protein-like protein At5g64080 (Precursor) GN=At5g64080 OS=Arabidopsis thaliana (Mouse-ear cress) PE=1 SV=1	hypothetical protein JCGZ_11989 [Jatropha curcas]
	VF20569	3.82063	0.913547	0.890871	3.30958	9.44833	23.8033	Putative pumilio homolog 7, chloroplastic (Precursor) GN=APUM7 OS=Arabidopsis thaliana (Mouse-ear cress) PE=3 SV=2	hypothetical protein JCGZ_15777 [Jatropha curcas]
	VF20565	0.0729298	0.0224111	0.0396863	0.0406221	0.0259444	118.293	L-ascorbate oxidase homolog (Precursor) GN=Bp10 OS=Brassica napus (Rape) PE=2 SV=1	multicopper oxidase, putative [Ricinus communis]
	VF20533	3.83652	3.27548	2.83036	3.98086	16.3224	75.3871	Beta-galactosidase 13 (Precursor) GN=BGAL13 OS=Arabidopsis thaliana (Mouse-ear cress) PE=2 SV=1	hypothetical protein JCGZ_18811 [Jatropha curcas]
	VF20522	0.0991742	0	0	0.0710247	2.25773	5.83285	NAC transcription factor NAM-B2 GN=NAM-B2 OS=Triticum turgidum subsp. durum (Durum wheat) PE=2 SV=1	NAC transcription factor 057 [Jatropha curcas]
	VF20496	0	0	0	0	1.91121	71.2469	Protein RALF-like 4 (Precursor) GN=RALFL4 OS=Arabidopsis thaliana (Mouse-ear cress) PE=3 SV=1	hypothetical protein JCGZ_03994 [Jatropha curcas]
	VF20486	0.0444882	0.0818585	0	0.0829205	0.364785	18.2686	ALA-interacting subunit 3 OS=Arabidopsis thaliana (Mouse-ear cress) PE=1 SV=1	PREDICTED: ALA-interacting subunit 3 [Vitis vinifera]
	VF20451	44.8692	14.346	11.1545	54.5135	117.705	405.468	Glycerol-3-phosphate 2-O-acyltransferase 6 GN=GPAT6 OS=Arabidopsis thaliana (Mouse-ear cress) PE=1 SV=1	hypothetical protein JCGZ_25041 [Jatropha curcas]
	VF20441	0.0252698	0.460895	0.159833	0.0280555	0.281729	29.5112	Laccase-4 (Precursor) GN=F16M14.1 OS=Arabidopsis thaliana (Mouse-ear cress) PE=2 SV=2	laccase, putative [Ricinus communis]
	VF20435	4.30127	3.79809	13.0472	8.15246	8.20319	96.3435	Probable anion transporter 3, chloroplastic (Precursor) GN=T8P21.3 OS=Arabidopsis thaliana (Mouse-ear cress) PE=2 SV=2	Sialin, putative [Ricinus communis]
	VF20399	0.379964	2.16637	4.81325	0.416998	0.685239	12.0552	18.2 kDa class I heat shock protein GN=HSP18.2 OS=Medicago sativa (Alfalfa) PE=2 SV=1	PREDICTED: 18.1 kDa class I heat shock protein-like [Populus euphratica]
	VF20392	2.30902	0.77667	1.45199	2.33399	1.97571	19.3461	--	Bifunctional inhibitor/lipid-transfer protein/seed storage 2S albumin superfamily protein isoform 1 [Theobroma cacao]
	VF20360	0	1.76562	0	1.35191	9.25075	118.795	--	hypothetical protein JCGZ_25126 [Jatropha curcas]
	VF20344	1.82702	3.28628	3.50631	1.05364	2.08035	7.76708	Thaumatin-like protein (Precursor) OS=Oryza sativa subsp. japonica (Rice) PE=2 SV=1	Zeamatin precursor, putative [Ricinus communis]
	VF20262	55.7931	19.9357	25.2396	70.6291	31.8435	228.361	Putative caffeoyl-CoA O-methyltransferase At1g67980 GN=At1g67980 OS=Arabidopsis thaliana (Mouse-ear cress) PE=2 SV=1	hypothetical protein JCGZ_04785 [Jatropha curcas]
	VF20224	0.0689715	0.423077	0.769808	0.0971295	0.253169	3.36788	Nudix hydrolase 17, mitochondrial (Precursor) GN=T8O11.16 OS=Arabidopsis thaliana (Mouse-ear cress) PE=2 SV=1	hypothetical protein JCGZ_04752 [Jatropha curcas]
	VF20176	1.89965	1.40182	1.28283	1.41262	1.54927	3.97539	Probable calcium-binding protein CML18 GN=F13E7.5 OS=Arabidopsis thaliana (Mouse-ear cress) PE=1 SV=1	unnamed protein product [Coffea canephora]
	VF20053	3.99764	11.7632	12.3025	7.66287	17.2249	92.2495	Citrate-binding protein (Precursor) GN=CBP OS=Hevea brasiliensis (Para rubber tree) PE=1 SV=1	hypothetical protein JCGZ_09464 [Jatropha curcas]
	VF19941	0.328316	3.355	4.21892	0.59119	2.41882	12.6373	Chlorophyll a-b binding protein CP29.3, chloroplastic (Precursor) GN=LHCB4.3 OS=Arabidopsis thaliana (Mouse-ear cress) PE=2 SV=1	hypothetical protein JCGZ_01281 [Jatropha curcas]
	VF19940	27.5089	42.0005	43.102	37.3116	42.7432	89.308	Protein yippee-like OS=Solanum tuberosum (Potato) PE=2 SV=1	PREDICTED: protein yippee-like [Vitis vinifera]
	VF19929	7.80775	8.18933	8.62586	7.09329	10.7495	53.1071	--	hypothetical protein JCGZ_26607 [Jatropha curcas]
	VF19893	2.16588	6.38803	2.42458	1.46918	5.60767	14.0958	Alkane hydroxylase MAH1 {ECO:0000303|PubMed:17905869} OS=Arabidopsis thaliana (Mouse-ear cress) PE=2 SV=1	hypothetical protein JCGZ_09413 [Jatropha curcas]
	VF19881	2.66392	4.69163	6.80385	1.97861	3.52543	15.971	U-box domain-containing protein 26 GN=PUB26 OS=Arabidopsis thaliana (Mouse-ear cress) PE=2 SV=1	hypothetical protein JCGZ_14786 [Jatropha curcas]
	VF19875	1.4323	2.80742	2.6109	2.09027	3.65305	10.5863	--	amino acid transporter, putative [Ricinus communis]
	VF19870	0.236726	0.487111	0.380053	0.239346	3.11646	19.8003	BTB/POZ domain-containing protein At3g56230 GN=At3g56230 OS=Arabidopsis thaliana (Mouse-ear cress) PE=2 SV=1	hypothetical protein JCGZ_03359 [Jatropha curcas]
	VF19865	0.319082	0.763197	0.113036	0.119897	0.0417047	1.69489	LOB domain-containing protein 15 GN=T2P4.18 OS=Arabidopsis thaliana (Mouse-ear cress) PE=2 SV=2	hypothetical protein JCGZ_03351 [Jatropha curcas]
	VF19815	1.70892	3.50212	1.84438	2.28055	1.3544	16.9197	--	conserved hypothetical protein [Ricinus communis]
	VF19750	3.92961	2.93798	3.08079	3.91211	3.96183	15.8605	Probable serine/threonine-protein kinase WNK4 GN=WNK4 OS=Arabidopsis thaliana (Mouse-ear cress) PE=1 SV=1	hypothetical protein JCGZ_17324 [Jatropha curcas]
	VF19723	0.59052	0.43403	0.406696	0.798439	0.806096	15.3876	Probable serine/threonine-protein kinase WNK4 OS=Oryza sativa subsp. japonica (Rice) PE=2 SV=1	hypothetical protein JCGZ_14225 [Jatropha curcas]
	VF19708	3.73331	8.55056	4.76505	2.34288	4.68595	19.1447	--	hypothetical protein JCGZ_14211 [Jatropha curcas]
	VF19679	0	0	0.0417024	0	0.0791148	6.44276	Probable glycosyltransferase At3g07620 GN=At3g07620 OS=Arabidopsis thaliana (Mouse-ear cress) PE=3 SV=1	hypothetical protein POPTR_0014s16900g [Populus trichocarpa]
	VF19633	0.301581	0.105278	0.784055	0.26176	0.48955	44.5614	Transcription factor IBH1 GN=MFL8.8 OS=Arabidopsis thaliana (Mouse-ear cress) PE=1 SV=1	hypothetical protein JCGZ_23828 [Jatropha curcas]
	VF19515	0.761756	0	0	0	0	476.906	Major pollen allergen Ole e 6 GN=OLE6 OS=Olea europaea (Common olive) PE=1 SV=1	hypothetical protein EUGRSUZ_H01456 [Eucalyptus grandis]
	VF19498	1.3779	2.64226	0.303586	2.44367	0.574509	7.11788	Transcription repressor OFP12 GN=OFP12 OS=Arabidopsis thaliana (Mouse-ear cress) PE=1 SV=1	hypothetical protein JCGZ_21913 [Jatropha curcas]
	VF19411	0.63946	0.155423	0.257254	0.289762	0.273661	1.66752	Probable galacturonosyltransferase-like 4 GN=F28L1.20 OS=Arabidopsis thaliana (Mouse-ear cress) PE=2 SV=1	hypothetical protein JCGZ_21985 [Jatropha curcas]
	VF19401	0.326807	0.687125	0	0	0.461298	6.32122	--	hypothetical protein JCGZ_21994 [Jatropha curcas]
	VF19343	9.37623	4.49271	8.1322	7.64651	9.38607	62.6357	Xylose isomerase GN=XYLA OS=Arabidopsis thaliana (Mouse-ear cress) PE=2 SV=2	hypothetical protein JCGZ_23014 [Jatropha curcas]
	VF19330	0	0	0	0.165926	0	7.49126	Lachrymatory-factor synthase (Precursor) GN=LFS OS=Allium cepa (Onion) PE=1 SV=1	hypothetical protein JCGZ_07302 [Jatropha curcas]
	VF19282	0.411567	0.533022	0.955763	0.166449	0.321086	3.95386	Dehydration-responsive protein RD22 (Precursor) GN=RD22 OS=Arabidopsis thaliana (Mouse-ear cress) PE=2 SV=1	polygalacturonase, putative [Ricinus communis]
	VF19265	0.0308937	0	0	0	0.0216689	12.5686	Serine/threonine-protein kinase AGC1-7 {ECO:0000305} OS=Arabidopsis thaliana (Mouse-ear cress) PE=1 SV=1	hypothetical protein JCGZ_04245 [Jatropha curcas]
	VF19249	0	0	0	0	0	12.7382	Putative invertase inhibitor (Precursor) OS=Platanus acerifolia (London plane tree) PE=1 SV=1	conserved hypothetical protein [Ricinus communis]
	VF19244	0.188551	0.253898	0.39425	0.524435	1.96236	5.66422	Probable polyol transporter 6 GN=PLT6 OS=Arabidopsis thaliana (Mouse-ear cress) PE=2 SV=2	hypothetical protein JCGZ_20028 [Jatropha curcas]
	VF19215	7.72509	4.51486	16.8923	15.5181	13.5348	61.8334	Vinorine synthase GN=ACT OS=Rauvolfia serpentina (Serpentine wood) PE=1 SV=2	hypothetical protein JCGZ_16163 [Jatropha curcas]
	VF19211	0	0	0	0	0	12.466	--	hypothetical protein JCGZ_16163 [Jatropha curcas]
	VF19101	2.3951	2.16392	3.94799	1.72287	1.82418	8.9236	Protein NRT1/ PTR FAMILY 4.6 GN=At1g69850 OS=Arabidopsis thaliana (Mouse-ear cress) PE=1 SV=1	hypothetical protein JCGZ_21705 [Jatropha curcas]
	VF19090	0.0536223	0	0.0186734	0.0393379	0	43.5178	Probable pectate lyase 7 (Precursor) GN=At3g01270 OS=Arabidopsis thaliana (Mouse-ear cress) PE=2 SV=1	Pectate lyase precursor, putative [Ricinus communis]
	VF18986	0	0	0	0	0	3.71902	Pectinesterase PPME1 (Precursor) GN=T17F3.3 OS=Arabidopsis thaliana (Mouse-ear cress) PE=1 SV=1	Pectinesterase-1 precursor, putative [Ricinus communis]
	VF18979	0	0	0	0.0785239	0	22.2715	--	hypothetical protein JCGZ_22733 [Jatropha curcas]
	VF18878	7.99	6.4756	6.56671	5.79223	7.75514	22.3243	BAG family molecular chaperone regulator 4 GN=BAG4 OS=Arabidopsis thaliana (Mouse-ear cress) PE=1 SV=1	hypothetical protein JCGZ_17340 [Jatropha curcas]
	VF18865	0.482291	1.00792	1.04659	0.638809	0.609123	9.82006	Peptidyl-prolyl cis-trans isomerase FKBP62 GN=MJL12.19 OS=Arabidopsis thaliana (Mouse-ear cress) PE=1 SV=2	hypothetical protein JCGZ_13125 [Jatropha curcas]
	VF18781	4.34693	7.36019	2.83358	6.81596	10.9015	29.9796	UDP-glycosyltransferase 74F2 GN=F18O19.7 OS=Arabidopsis thaliana (Mouse-ear cress) PE=1 SV=1	hypothetical protein JCGZ_15067 [Jatropha curcas]
	VF18779	0.193605	0.025129	0.0664484	0.114273	0	27.0586	--	hypothetical protein JCGZ_15065 [Jatropha curcas]
	VF18743	17.5857	13.6321	13.1381	17.2348	14.7697	35.2352	Probable protein phosphatase 2C 38 GN=At3g12620 OS=Arabidopsis thaliana (Mouse-ear cress) PE=2 SV=1	hypothetical protein JCGZ_06643 [Jatropha curcas]
	VF18718	3.38557	5.00689	4.90882	3.95394	5.06551	10.2455	PI-PLC X domain-containing protein At5g67130 (Precursor) GN=At5g67130 OS=Arabidopsis thaliana (Mouse-ear cress) PE=1 SV=1	hypothetical protein JCGZ_12407 [Jatropha curcas]
	VF18675	0.574646	3.00338	1.89441	0.104493	2.878	99.6252	Protein IRX15-LIKE GN=IRX15-L OS=Arabidopsis thaliana (Mouse-ear cress) PE=2 SV=1	conserved hypothetical protein [Ricinus communis]
	VF18653	0	0	0	0	0	1.01787	--	hypothetical protein JCGZ_12466 [Jatropha curcas]
	VF18617	0.903459	1.25098	0.869133	0.839231	0.770518	6.80321	CRIB domain-containing protein RIC1 GN=RIC1 OS=Arabidopsis thaliana (Mouse-ear cress) PE=1 SV=1	hypothetical protein JCGZ_17662 [Jatropha curcas]
	VF18616	0.0775182	0.0340211	0	0.134429	0.341674	15.304	--	hypothetical protein JCGZ_17663 [Jatropha curcas]
	VF18573	0	0	8.57025e-05	0	0.0677125	3.20244	Inorganic phosphate transporter 1-4 GN=T7F6.11 OS=Arabidopsis thaliana (Mouse-ear cress) PE=1 SV=1	inorganic phosphate transporter, putative [Ricinus communis]
	VF18548	33.1173	24.4399	27.5001	65.9906	111.719	281.965	Glutelin type-A 2 basic chain (Precursor) GN=OSJNBa0050N08.16 OS=Oryza sativa subsp. japonica (Rice) PE=1 SV=1	hypothetical protein JCGZ_05649 [Jatropha curcas]
	VF18537	1.65786	1.92911	1.75741	1.49806	1.72996	4.34015	Methyl-CpG-binding domain-containing protein 7 GN=MBD7 OS=Arabidopsis thaliana (Mouse-ear cress) PE=1 SV=1	PREDICTED: methyl-CpG-binding domain-containing protein 7-like [Pyrus x bretschneideri]
	VF18506	0	0	0	0	0	4.71596	Mitogen-activated protein kinase kinase 10 GN=MKK10 OS=Arabidopsis thaliana (Mouse-ear cress) PE=1 SV=1	hypothetical protein JCGZ_17105 [Jatropha curcas]
	VF18482	9.41727	2.18075	2.43457	12.678	11.362	65.564	Subtilisin-like protease SBT5.3 (Precursor) OS=Arabidopsis thaliana (Mouse-ear cress) PE=2 SV=1	Xylem serine proteinase 1 precursor, putative [Ricinus communis]
	VF18410	1.17012	0.720509	0.741949	1.24404	0.658072	40.5708	Heterogeneous nuclear ribonucleoprotein 1 GN=RNP1 OS=Arabidopsis thaliana (Mouse-ear cress) PE=1 SV=1	hypothetical protein JCGZ_09513 [Jatropha curcas]
	VF18393	1.79349	1.04699	3.39995	1.48243	5.34243	15.8911	Cyclin-dependent kinase inhibitor 7 GN=F14J22.14 OS=Arabidopsis thaliana (Mouse-ear cress) PE=1 SV=2	hypothetical protein JCGZ_01640 [Jatropha curcas]
	VF18389	12.2285	22.9387	22.5944	15.9521	23.1109	117.063	Glycerol kinase GN=T21F11.21 OS=Arabidopsis thaliana (Mouse-ear cress) PE=1 SV=1	hypothetical protein JCGZ_06104 [Jatropha curcas]
	VF18384	7.8825	14.906	4.94379	6.97946	11.8384	93.4464	--	hypothetical protein JCGZ_06106 [Jatropha curcas]
	VF18351	14.0077	8.39213	4.53256	20.2086	15.9477	195.47	Palmitoyl-monogalactosyldiacylglycerol delta-7 desaturase, chloroplastic (Precursor) GN=ADS3 OS=Arabidopsis thaliana (Mouse-ear cress) PE=2 SV=2	hypothetical protein JCGZ_06132 [Jatropha curcas]
	VF18335	106.8	160.08	170.705	163.828	175.719	353.33	Phospholipase D alpha 1 (Precursor) GN=PLD1 OS=Ricinus communis (Castor bean) PE=1 SV=1	phospholipase D [Jatropha curcas]
	VF18334	0.267624	0.26389	0.438777	0.647813	1.33082	79.7796	Ethylene-responsive transcription factor WIN1 GN=F9L1.31 OS=Arabidopsis thaliana (Mouse-ear cress) PE=2 SV=1	DNA binding protein, putative [Ricinus communis]
	VF18328	0	0	0	0.0577773	0.0765766	9.38721	Putative clathrin assembly protein At4g25940 GN=At4g25940 OS=Arabidopsis thaliana (Mouse-ear cress) PE=2 SV=1	clathrin assembly protein, putative [Ricinus communis]
	VF18321	1.98032	1.13662	1.79587	1.71271	1.62107	9.98189	Exocyst complex component EXO84A GN=EXO84A OS=Arabidopsis thaliana (Mouse-ear cress) PE=3 SV=1	hypothetical protein JCGZ_21727 [Jatropha curcas]
	VF18291	2.56184	4.03927	4.36363	2.18853	3.77013	13.129	Two-component response regulator ARR3 GN=ARR3 OS=Arabidopsis thaliana (Mouse-ear cress) PE=2 SV=1	hypothetical protein JCGZ_21755 [Jatropha curcas]
	VF18287	0.3295	0.0217239	0.141105	1.04711	0.326456	76.7024	Non-functional NADPH-dependent codeinone reductase 2 GN=COR2 OS=Papaver somniferum (Opium poppy) PE=1 SV=1	hypothetical protein JCGZ_21760 [Jatropha curcas]
	VF18282	10.949	10.3697	2.7778	12.6029	5.68194	103.898	IAA-amino acid hydrolase ILR1-like 2 (Precursor) GN=ILL2 OS=Arabidopsis thaliana (Mouse-ear cress) PE=1 SV=2	hypothetical protein JCGZ_21766 [Jatropha curcas]
	VF18264	1.71967	2.00306	2.08792	2.26293	2.21694	13.5374	Serine/threonine-protein kinase CDL1 {ECO:0000305} OS=Arabidopsis thaliana (Mouse-ear cress) PE=1 SV=1	hypothetical protein JCGZ_21784 [Jatropha curcas]
	VF18259	382.866	446.766	341.432	408.925	400.413	1266.35	MLP-like protein 423 OS=Arabidopsis thaliana (Mouse-ear cress) PE=2 SV=1	hypothetical protein JCGZ_21787 [Jatropha curcas]
	VF18228	0.000399526	0.0359193	2.19141e-07	0.0318906	0	1.36548	Diacylglycerol kinase 1 GN=DGK1 OS=Arabidopsis thaliana (Mouse-ear cress) PE=1 SV=2	diacylglycerol kinase, theta, putative [Ricinus communis]
	VF18227	0	0	0	0	0	2.31763	NAC domain-containing protein 68 OS=Oryza sativa subsp. japonica (Rice) PE=2 SV=1	NAC transcription factor 058, partial [Jatropha curcas]
	VF18196	0.0960912	0.516454	0.467685	0.34933	0.473992	2.29149	Nuclear transcription factor Y subunit B-6 GN=MNJ7.26 OS=Arabidopsis thaliana (Mouse-ear cress) PE=1 SV=2	leafy-cotyledon protein 1 [Jatropha curcas]
	VF18154	0	0.301533	1.00986	0	0.260503	4.68192	UDP-glycosyltransferase 88A1 GN=UGT88A1 OS=Arabidopsis thaliana (Mouse-ear cress) PE=2 SV=1	hypothetical protein JCGZ_10943 [Jatropha curcas]
	VF18139	0	0.0395619	0.285537	0.0775795	0.405527	67.5942	V-type proton ATPase subunit G GN=VATG OS=Citrus limon (Lemon) PE=3 SV=1	vacuolar ATP synthase subunit G plant, putative [Ricinus communis]
	VF18102	0.062712	0.0125938	0.0235566	0.0114491	0.407755	122.651	Sugar transport protein 1 GN=STP1 OS=Arabidopsis thaliana (Mouse-ear cress) PE=1 SV=2	sugar transporter, putative [Ricinus communis]
	VF18098	42.5353	45.628	35.9695	54.382	39.3455	112.408	--	Heavy metal transport/detoxification superfamily protein, putative isoform 1 [Theobroma cacao]
	VF17972	0.0968534	0.179347	0.209792	0.148249	0.19687	2.02847	Putative receptor protein kinase ZmPK1 (Precursor) GN=PK1 OS=Zea mays (Maize) PE=2 SV=2	hypothetical protein JCGZ_16084 [Jatropha curcas]
	VF17964	9.63544	25.8264	22.9101	13.486	8.29883	110.344	Isoaspartyl peptidase/L-asparaginase 2 subunit beta (Precursor) GN=At3g16150 OS=Arabidopsis thaliana (Mouse-ear cress) PE=2 SV=2	l-asparaginase, putative [Ricinus communis]
	VF17957	123.758	144.561	189.51	106.484	127.248	430.244	Oryzain alpha chain (Precursor) OS=Oryza sativa subsp. japonica (Rice) PE=1 SV=2	hypothetical protein JCGZ_16099 [Jatropha curcas]
	VF17903	4.69018	4.67743	5.00785	4.20185	4.35063	10.1474	Protein WEAK CHLOROPLAST MOVEMENT UNDER BLUE LIGHT 1 GN=WEB1 OS=Arabidopsis thaliana (Mouse-ear cress) PE=1 SV=1	hypothetical protein JCGZ_04266 [Jatropha curcas]
	VF17902	0.202683	0.387779	0.220642	0.082523	0.286863	9.24677	UDP-glucuronate:xylan alpha-glucuronosyltransferase 2 GN=F17M5.90/F17M5.100 OS=Arabidopsis thaliana (Mouse-ear cress) PE=2 SV=1	glycogenin, putative [Ricinus communis]
	VF17879	8.81925	11.5496	9.57399	7.99882	10.1154	45.8522	--	hypothetical protein JCGZ_04298 [Jatropha curcas]
	VF17867	11.6	10.6594	14.1037	10.3218	8.39659	42.8384	Probable inactive heme oxygenase 2, chloroplastic (Precursor) GN=HO2 OS=Arabidopsis thaliana (Mouse-ear cress) PE=2 SV=2	hypothetical protein JCGZ_04310 [Jatropha curcas]
	VF17786	0.691219	3.1725	2.68858	1.15039	10.6719	48.5378	Calcium uniporter protein 4, mitochondrial (Precursor) OS=Arabidopsis thaliana (Mouse-ear cress) PE=2 SV=1	hypothetical protein JCGZ_04389 [Jatropha curcas]
	VF17728	0.125659	0.223182	0.184699	0.619223	3.52355	24.7777	Probable uracil phosphoribosyltransferase GN=UKL5 OS=Arabidopsis thaliana (Mouse-ear cress) PE=2 SV=1	hypothetical protein JCGZ_10232 [Jatropha curcas]
	VF17707	0	0	0	0	0	25.8648	--	conserved hypothetical protein [Ricinus communis]
	VF17705	0.0791935	0.365526	0.180879	0.288311	0.249692	1.09485	Abscisic acid receptor PYR1 GN=T6K21.50 OS=Arabidopsis thaliana (Mouse-ear cress) PE=1 SV=1	conserved hypothetical protein [Ricinus communis]
	VF17651	0.483594	0.235807	0.121009	0.421426	0.458963	2.74143	Chaperone protein dnaJ 20, chloroplastic (Precursor) GN=F18A5.220 OS=Arabidopsis thaliana (Mouse-ear cress) PE=1 SV=2	hypothetical protein JCGZ_15163 [Jatropha curcas]
	VF17646	4.26353	7.43179	3.07769	4.83112	7.15462	27.2942	Caffeoylshikimate esterase GN=CSE OS=Arabidopsis thaliana (Mouse-ear cress) PE=1 SV=1	hypothetical protein JCGZ_13936 [Jatropha curcas]
	VF17635	12.4712	20.7376	0.717965	2.41702	7.55354	757.163	Indole-3-acetic acid-induced protein ARG2 GN=ARG2 OS=Vigna radiata var. radiata (Mung bean) PE=2 SV=1	late embryogenesis abundant protein 5 [Populus suaveolens]
	VF17634	98.0389	49.507	14.88	46.9317	30.4112	286.503	Indole-3-acetic acid-induced protein ARG2 GN=ARG2 OS=Vigna radiata var. radiata (Mung bean) PE=2 SV=1	Indole-3-acetic acid-induced protein ARG2, putative [Ricinus communis]
	VF17632	14.6453	31.9289	35.7914	29.6906	28.9667	76.2017	Uncharacterized protein At5g01610 GN=At5g01610 OS=Arabidopsis thaliana (Mouse-ear cress) PE=1 SV=1	hypothetical protein JCGZ_13951 [Jatropha curcas]
	VF17631	1.22577	1.13962	5.73621	0.737216	61.378	715.948	--	conserved hypothetical protein [Ricinus communis]
	VF17627	0.560373	1.58177	0.709341	0.25936	0.431419	3.40718	--	hypothetical protein JCGZ_13956 [Jatropha curcas]
	VF17626	0	0.034327	0.0617781	0.0953102	0.0292354	6.03865	--	hypothetical protein JCGZ_13957 [Jatropha curcas]
	VF17624	0.654373	0.777956	0.237606	0.585094	0.249833	2.89709	--	epoxide hydrolase, putative [Ricinus communis]
	VF17622	0.187178	0.241801	0	0	0	11.5323	Pectinesterase 26 GN=MLN21.8 OS=Arabidopsis thaliana (Mouse-ear cress) PE=2 SV=1	hypothetical protein JCGZ_13959 [Jatropha curcas]
	VF17616	0.125995	0	0.0552341	0	0.162772	265.547	Exopolygalacturonase clone GBGE184 (Precursor) GN=PGA3 OS=Arabidopsis thaliana (Mouse-ear cress) PE=2 SV=1	hypothetical protein JCGZ_24417 [Jatropha curcas]
	VF17562	2.09035	3.69656	2.29014	1.16485	1.67344	13.7474	Universal stress protein A-like protein GN=At3g01520 OS=Arabidopsis thaliana (Mouse-ear cress) PE=1 SV=2	hypothetical protein JCGZ_14017 [Jatropha curcas]
	VF17538	0.0172288	0.000123889	0.162468	0.100604	0.18902	55.9111	--	hypothetical protein JCGZ_14040 [Jatropha curcas]
	VF17530	0	0	0	0	0	3.02607	Uncharacterized protein At5g48480 GN=At5g48480 OS=Arabidopsis thaliana (Mouse-ear cress) PE=1 SV=1	conserved hypothetical protein [Ricinus communis]
	VF17437	0	0	0	0	0	4.2144	Pectinesterase PPME1 (Precursor) GN=T17F3.3 OS=Arabidopsis thaliana (Mouse-ear cress) PE=1 SV=1	Pectinesterase-1 precursor, putative [Ricinus communis]
	VF17411	0.17391	0.279313	0.25744	0.542677	0.121	2.66758	UDP-glycosyltransferase 74E2 GN=UGT74E2 OS=Arabidopsis thaliana (Mouse-ear cress) PE=1 SV=1	hypothetical protein JCGZ_10663 [Jatropha curcas]
	VF17392	1.77383	1.56068	1.00802	2.53457	1.87938	19.4093	Leucoanthocyanidin dioxygenase GN=ANS OS=Malus domestica (Apple) PE=2 SV=1	oxidoreductase family protein [Populus trichocarpa]
	VF17357	0.249173	0.0294056	0.0373443	0.325953	0.0723358	14.4407	--	ATSMC2, putative [Ricinus communis]
	VF17328	0.251465	0.0577874	0.0931662	0.25511	0.179563	295.231	Expansin-A2 (Precursor) GN=K18I23.9 OS=Arabidopsis thaliana (Mouse-ear cress) PE=2 SV=2	hypothetical protein JCGZ_16586 [Jatropha curcas]
	VF17280	0	3.19574	2.66888	5.29369	2.74693	25.5097	--	conserved hypothetical protein [Ricinus communis]
	VF17278	50.9411	56.5078	78.2919	36.6072	45.3812	236.727	--	hypothetical protein JCGZ_26277 [Jatropha curcas]
	VF17261	0.37029	0.051409	0	0.429183	0.310926	2.30725	Probable aquaporin TIP5-1, N-terminally processed GN=TIP5-1 OS=Arabidopsis thaliana (Mouse-ear cress) PE=2 SV=1	tonoplast intrinsic protein, putative [Ricinus communis]
	VF17182	0.140539	0.01873	0	0.623049	1.72154	5.56246	Transcription factor bHLH126 GN=T30C3.80 OS=Arabidopsis thaliana (Mouse-ear cress) PE=2 SV=1	hypothetical protein JCGZ_26190 [Jatropha curcas]
	VF17160	0.184858	1.06901	1.5147	1.02141	0.631877	3.25213	--	hypothetical protein CISIN_1g037945mg, partial [Citrus sinensis]
	VF17158	0	0	0	0	0	3.18938	Cation/H(+) antiporter 2 GN=T8K14.18 OS=Arabidopsis thaliana (Mouse-ear cress) PE=2 SV=1	hypothetical protein JCGZ_16764 [Jatropha curcas]
	VF17145	0	0	0.0273497	1.38861e-05	1.09694	2.30235	F-box protein At3g26010 GN=At3g26010 OS=Arabidopsis thaliana (Mouse-ear cress) PE=2 SV=1	hypothetical protein PRUPE_ppa020014mg [Prunus persica]
	VF17044	0.362313	0.328356	0.395118	0.27937	0.206246	4.47449	Protein trichome birefringence-like 31 GN=TBL31 OS=Arabidopsis thaliana (Mouse-ear cress) PE=2 SV=1	hypothetical protein POPTR_0001s38580g [Populus trichocarpa]
	VF17018	0.405348	0.104896	0.0490058	1.00875	0.0602214	7.87641	Protein NRT1/ PTR FAMILY 7.1 GN=NPF7.1 OS=Arabidopsis thaliana (Mouse-ear cress) PE=2 SV=1	hypothetical protein JCGZ_16932 [Jatropha curcas]
	VF17015	2.78514	4.59274	1.97884	3.81707	3.89264	21.4901	Glutaredoxin-C9 GN=F3M18.8 OS=Arabidopsis thaliana (Mouse-ear cress) PE=1 SV=1	hypothetical protein JCGZ_21489 [Jatropha curcas]
	VF17007	0	0	0.294428	0	0	24.3015	--	hypothetical protein JCGZ_21484 [Jatropha curcas]
	VF17000	7.47899	8.80422	8.69929	4.66343	7.94585	41.6986	Alpha-glucan phosphorylase, H isozyme OS=Solanum tuberosum (Potato) PE=1 SV=1	PREDICTED: glycogen phosphorylase 1-like isoform X1 [Populus euphratica]
	VF16936	16.6172	5.10902	5.78909	10.7361	7.13481	74.1239	Probable carboxylesterase 8 GN=CXE8 OS=Arabidopsis thaliana (Mouse-ear cress) PE=2 SV=1	JHL05D22.16 [Jatropha curcas]
	VF16930	0.756155	1.17315	0.836786	1.40597	1.14243	11.327	Vacuolar-sorting receptor 6 (Precursor) GN=F17F8.23 OS=Arabidopsis thaliana (Mouse-ear cress) PE=2 SV=3	hypothetical protein JCGZ_26665 [Jatropha curcas]
	VF16917	0	0.797014	1.78239	0.110259	0	5.04007	Zinc finger protein 2 GN=ZFP2 OS=Arabidopsis thaliana (Mouse-ear cress) PE=2 SV=1	hypothetical protein JCGZ_08681 [Jatropha curcas]
	VF16914	0.109731	0.219472	0.247201	0.0130268	0.228436	2.61214	Probable LRR receptor-like serine/threonine-protein kinase At1g53430 (Precursor) GN=At1g53430 OS=Arabidopsis thaliana (Mouse-ear cress) PE=1 SV=1	hypothetical protein JCGZ_25363 [Jatropha curcas]
	VF16905	31.6973	14.065	22.4379	36.499	33.9235	74.6851	Synaptotagmin-1 OS=Arabidopsis thaliana (Mouse-ear cress) PE=1 SV=2	Synaptotagmin A isoform 1 [Theobroma cacao]
	VF16902	0.0204477	0	0.0150592	0.0498593	0.00766602	6.81001	Beta-galactosidase 11 (Precursor) GN=BGAL11 OS=Arabidopsis thaliana (Mouse-ear cress) PE=2 SV=1	hypothetical protein JCGZ_18810 [Jatropha curcas]
	VF16857	0	0	0	0.213791	0.085002	23.7175	F-box protein CPR30 GN=CPR30 OS=Arabidopsis thaliana (Mouse-ear cress) PE=1 SV=2	hypothetical protein JCGZ_00670 [Jatropha curcas]
	VF16816	0	0	0	0	0	1.99094	Pectinesterase PPME1 (Precursor) GN=T17F3.3 OS=Arabidopsis thaliana (Mouse-ear cress) PE=1 SV=1	Pectinesterase-1 precursor, putative [Ricinus communis]
	VF16812	7.92172	2.62611	4.50849	14.4031	11.6167	154.268	Metal transporter Nramp1 GN=F23A5.18 OS=Arabidopsis thaliana (Mouse-ear cress) PE=1 SV=1	hypothetical protein JCGZ_26995 [Jatropha curcas]
	VF16809	13.646	23.685	33.752	21.3101	31.9989	86.8146	Cinnamoyl-CoA reductase 1 GN=T24D18.5 OS=Arabidopsis thaliana (Mouse-ear cress) PE=1 SV=1	hypothetical protein JCGZ_26997 [Jatropha curcas]
	VF16713	2.4662	2.09718	3.56234	3.77104	15.9549	63.0261	La-related protein 6C GN=LARP6C OS=Arabidopsis thaliana (Mouse-ear cress) PE=3 SV=1	hypothetical protein JCGZ_04881 [Jatropha curcas]
	VF16621	0	0	0	0	0	1.7915	CLE5p (Precursor) GN=T16B12 OS=Arabidopsis thaliana (Mouse-ear cress) PE=2 SV=2	conserved hypothetical protein [Ricinus communis]
	VF16620	13.2241	13.2723	7.17864	8.60977	54.9396	198.917	GDSL esterase/lipase At5g45920 GN=At5g45920 OS=Arabidopsis thaliana (Mouse-ear cress) PE=2 SV=1	hypothetical protein JCGZ_21536 [Jatropha curcas]
	VF16611	0.291415	0.487005	0.44993	0.323085	0.484682	1.07951	GDSL esterase/lipase EXL3 (Precursor) GN=EXL3 OS=Arabidopsis thaliana (Mouse-ear cress) PE=2 SV=1	hypothetical protein JCGZ_25375 [Jatropha curcas]
	VF16597	0.548683	0.350512	0.505266	1.11123	0.144855	2.54961	--	hypothetical protein JCGZ_15344 [Jatropha curcas]
	VF16584	0	0.0998645	0.0457627	0.0138645	0.193294	32.9275	Laccase-4 (Precursor) GN=F16M14.1 OS=Arabidopsis thaliana (Mouse-ear cress) PE=2 SV=2	laccase, putative [Ricinus communis]
	VF16563	0.262166	1.37043	0.517699	2.21697	2.01668	6.7089	7-deoxyloganetic acid glucosyltransferase GN=UGT709C2 OS=Catharanthus roseus (Madagascar periwinkle) PE=1 SV=1	PREDICTED: 7-deoxyloganetic acid glucosyltransferase-like [Populus euphratica]
	VF16562	44.5414	45.2461	46.1022	37.3775	32.7413	93.8796	UDP-glycosyltransferase 76F1 GN=UGT76F1 OS=Arabidopsis thaliana (Mouse-ear cress) PE=2 SV=1	unnamed protein product [Vitis vinifera]
	VF16561	0.655653	0.503584	0.743864	1.44202	0.694188	3.1044	(-)-germacrene D synthase OS=Vitis vinifera (Grape) PE=1 SV=1	hypothetical protein JCGZ_00772 [Jatropha curcas]
	VF16559	0.750903	0.0614855	1.8279	0.338838	1.43672	5.99672	Germin-like protein subfamily 1 member 17 (Precursor) GN=At5g39150 OS=Arabidopsis thaliana (Mouse-ear cress) PE=2 SV=1	Rhicadhesin receptor precursor, putative [Ricinus communis]
	VF16527	0.945865	4.69821	21.0192	0.975367	2.70328	48.6498	--	hypothetical protein POPTR_0006s05890g [Populus trichocarpa]
	VF16484	0.178595	1.46138	0.422493	0.229685	0.769591	3.30378	Expansin-A8 (Precursor) GN=T2P4.4 OS=Arabidopsis thaliana (Mouse-ear cress) PE=2 SV=1	Alpha-expansin 8 precursor, putative [Ricinus communis]
	VF16455	0.0912357	0	0.0574168	0	0	34.8865	Beta-amyrin 28-oxidase OS=Panax ginseng (Korean ginseng) PE=2 SV=1	hypothetical protein JCGZ_01605 [Jatropha curcas]
	VF16450	2.82123	1.31174	1.4691	2.69628	2.02088	7.35328	Serine/threonine-protein kinase GN=PUB52 OS=Arabidopsis thaliana (Mouse-ear cress) PE=2 SV=1	hypothetical protein JCGZ_06981 [Jatropha curcas]
	VF16449	10.8015	6.91634	6.26825	9.26152	10.7145	24.6263	Probable nucleoredoxin 3 GN=At4g31240 OS=Arabidopsis thaliana (Mouse-ear cress) PE=2 SV=1	hypothetical protein JCGZ_06982 [Jatropha curcas]
	VF16433	17.6469	29.5914	25.2024	32.883	58.9735	161.723	Probable sarcosine oxidase GN=At2g24580 OS=Arabidopsis thaliana (Mouse-ear cress) PE=2 SV=1	hypothetical protein JCGZ_07030 [Jatropha curcas]
	VF16422	20.3028	23.5813	27.1728	21.4675	28.4775	69.5307	--	hypothetical protein JCGZ_15956 [Jatropha curcas]
	VF16396	0	0	0.172517	0.336633	0	1.89163	--	conserved hypothetical protein [Ricinus communis]
	VF16360	0	0	0	0.0665505	0.0300504	19.6637	Tyrosine decarboxylase GN=TYDC2 OS=Papaver somniferum (Opium poppy) PE=2 SV=1	hypothetical protein JCGZ_04665 [Jatropha curcas]
	VF16324	34.0266	10.8784	9.86288	30.9962	35.687	84.6764	Annexin D8 GN=T2L20 OS=Arabidopsis thaliana (Mouse-ear cress) PE=2 SV=2	hypothetical protein JCGZ_02698 [Jatropha curcas]
	VF16315	3.68941	0.77713	1.67407	6.64433	19.0506	54.1408	Transcription repressor MYB5 GN=MYB5 OS=Arabidopsis thaliana (Mouse-ear cress) PE=1 SV=1	hypothetical protein JCGZ_02708 [Jatropha curcas]
	VF16231	95.7428	76.6717	40.4643	87.0128	99.6984	393.715	GDSL esterase/lipase LTL1 (Precursor) GN=LTL1 OS=Arabidopsis thaliana (Mouse-ear cress) PE=2 SV=1	zinc finger protein, putative [Ricinus communis]
	VF16220	0	0	0	0.106224	0	6.27365	--	hypothetical protein JCGZ_23573 [Jatropha curcas]
	VF16209	1.17124	2.3044	2.13354	1.72176	1.90424	62.2978	BON1-associated protein 2 GN=F4I18.26 OS=Arabidopsis thaliana (Mouse-ear cress) PE=1 SV=1	hypothetical protein JCGZ_23563 [Jatropha curcas]
	VF16161	0.906932	0.737567	0.238766	0.753976	0.414758	9.15085	Myosin-11 GN=T22H22.1 OS=Arabidopsis thaliana (Mouse-ear cress) PE=3 SV=1	hypothetical protein JCGZ_23526 [Jatropha curcas]
	VF16159	0	0	0	0	0	2.37896	--	hypothetical protein JCGZ_23524 [Jatropha curcas]
	VF16145	0.442404	1.17322	1.12985	1.52184	1.00013	3.51137	--	hypothetical protein JCGZ_23510 [Jatropha curcas]
	VF16122	0	0	0.188937	0	0.598006	3.62379	Calmodulin-like protein 11 GN=CML11 OS=Arabidopsis thaliana (Mouse-ear cress) PE=2 SV=1	hypothetical protein JCGZ_23490 [Jatropha curcas]
	VF16096	0.0409408	0	0	0	0	7.13761	GDSL esterase/lipase At1g28650 (Precursor) GN=At1g28650 OS=Arabidopsis thaliana (Mouse-ear cress) PE=2 SV=1	Zeta-carotene desaturase, chloroplast precursor, putative [Ricinus communis]
	VF16077	0	0	0.0288341	0	0	7.83476	Late embryogenesis abundant protein D-34 OS=Gossypium hirsutum (Upland cotton) PE=4 SV=1	hypothetical protein JCGZ_23451 [Jatropha curcas]
	VF16053	10.8975	12.3893	13.5925	10.1369	11.6149	28.2039	Vesicle-associated protein 2-2, N-terminally processed GN=F22O13.31 OS=Arabidopsis thaliana (Mouse-ear cress) PE=1 SV=1	hypothetical protein JCGZ_23429 [Jatropha curcas]
	VF16050	0.41597	0.0733722	0.103632	0.786662	2.78165	8.35917	Coiled-coil domain-containing protein SCD2 {ECO:0000305} OS=Arabidopsis thaliana (Mouse-ear cress) PE=1 SV=1	PREDICTED: uncharacterized protein LOC105131319 [Populus euphratica]
	VF16047	9.48727	8.49026	8.99036	7.50973	7.1572	20.6868	FRIGIDA-like protein 5 GN=FRL5 OS=Arabidopsis thaliana (Mouse-ear cress) PE=2 SV=1	hypothetical protein CICLE_v10000115mg [Citrus clementina]
	VF15984	0.821678	0.428658	0.227242	0.544427	0.773914	2.92689	Coleoptile phototropism protein 1 OS=Oryza sativa subsp. japonica (Rice) PE=2 SV=1	hypothetical protein JCGZ_23364 [Jatropha curcas]
	VF15974	0.088838	0.402304	0.07073	0	0.0708055	3.99886	Uncharacterized GPI-anchored protein At3g06035 (Precursor) GN=At3g06035 OS=Arabidopsis thaliana (Mouse-ear cress) PE=2 SV=1	conserved hypothetical protein [Ricinus communis]
	VF15932	6.92274	22.1598	17.3944	10.4338	12.0976	60.2478	--	hypothetical protein JCGZ_23324 [Jatropha curcas]
	VF15919	0	0	0	0	0	4.91166	--	PREDICTED: uncharacterized protein LOC105127820 [Populus euphratica]
	VF15900	7.18698	6.68991	7.90736	9.09795	7.58657	22.2535	Serine/threonine-protein phosphatase PP1 isozyme 8 GN=TOPP8 OS=Arabidopsis thaliana (Mouse-ear cress) PE=2 SV=3	hypothetical protein JCGZ_23296 [Jatropha curcas]
	VF15897	0.198193	0.225638	0.17268	0.172979	0.0653561	1.07689	Bidirectional sugar transporter SWEET16 GN=OsJ_10795 OS=Oryza sativa subsp. japonica (Rice) PE=3 SV=1	hypothetical protein JCGZ_23294 [Jatropha curcas]
	VF15893	0.258088	0.459599	0.0439573	0.382858	0.577711	16.7687	Putative invertase inhibitor (Precursor) OS=Platanus acerifolia (London plane tree) PE=1 SV=1	hypothetical protein JCGZ_15480 [Jatropha curcas]
	VF15891	0.0332268	0	0	0	0	1.61963	Pectinesterase 21 GN=F18C1.12 OS=Arabidopsis thaliana (Mouse-ear cress) PE=2 SV=2	hypothetical protein JCGZ_23282 [Jatropha curcas]
	VF15873	0.440559	0.22602	0.207278	0.460888	0.198826	7.00061	Kinesin-4 GN=F2P16.12 OS=Arabidopsis thaliana (Mouse-ear cress) PE=1 SV=2	hypothetical protein JCGZ_23257 [Jatropha curcas]
	VF15849	36.2892	38.6573	30.7598	45.8642	36.5892	183.663	Pyrophosphate-energized vacuolar membrane proton pump 1 GN=F7H2.3 OS=Arabidopsis thaliana (Mouse-ear cress) PE=1 SV=1	hypothetical protein JCGZ_23210 [Jatropha curcas]
	VF15840	5.19411	4.54441	4.79801	4.69216	7.18255	14.6242	Nicotianamine synthase GN=CHLN OS=Solanum lycopersicum (Tomato) PE=2 SV=1	Nicotianamine synthase, putative [Ricinus communis]
	VF15815	0	5.18098	9.61461	1.63515	3.47228	19.6431	Protein disulfide isomerase-like 1-4 (Precursor) GN=MUP24.6 OS=Arabidopsis thaliana (Mouse-ear cress) PE=1 SV=1	hypothetical protein JCGZ_05522 [Jatropha curcas]
	VF15799	0.25268	0.21129	0.258535	0.325786	1.10432	7.37923	Taxadien-5-alpha-ol O-acetyltransferase OS=Taxus wallichiana var. chinensis (Chinese yew) PE=2 SV=1	hypothetical protein JCGZ_01231 [Jatropha curcas]
	VF15723	65.7234	43.5775	46.5494	57.2201	64.6216	177.967	Proteasome subunit alpha type-6 GN=PAA1 OS=Nicotiana tabacum (Common tobacco) PE=1 SV=1	hypothetical protein JCGZ_07500 [Jatropha curcas]
	VF15703	0.295538	0.160768	0.40571	0.299777	38.5527	334.624	Beta-galactosidase 15 (Precursor) GN=BGAL15 OS=Arabidopsis thaliana (Mouse-ear cress) PE=2 SV=1	beta-galactosidase, putative [Ricinus communis]
	VF15702	0.131215	0.0082972	0.0307158	0.0237394	0.781235	226.576	Beta-galactosidase (Precursor) OS=Brassica oleracea (Wild cabbage) PE=2 SV=1	beta-galactosidase, putative [Ricinus communis]
	VF15700	0.0409509	0.0173177	0.0145071	0.0244015	0.334188	15.3358	Beta-galactosidase (Precursor) OS=Brassica oleracea (Wild cabbage) PE=2 SV=1	hypothetical protein POPTR_0018s07470g [Populus trichocarpa]
	VF15678	6.79892	14.334	16.1875	9.07215	10.0039	43.2457	Auxin-induced protein 15A OS=Glycine max (Soybean) PE=2 SV=1	hypothetical protein JCGZ_07526 [Jatropha curcas]
	VF15677	2.62908	10.4116	3.47913	1.92112	11.9686	35.8796	--	conserved hypothetical protein [Ricinus communis]
	VF15649	0.624942	1.59386	2.6612	0.687031	3.23765	8.29038	GDSL esterase/lipase At4g16230 (Precursor) GN=At4g16230 OS=Arabidopsis thaliana (Mouse-ear cress) PE=3 SV=2	carboxylic ester hydrolase, putative [Ricinus communis]
	VF15560	0.222712	0.251873	0.1452	0.196183	0.279521	142.507	Beta-galactosidase (Precursor) OS=Solanum lycopersicum (Tomato) PE=1 SV=1	hypothetical protein JCGZ_07402 [Jatropha curcas]
	VF15510	0.772708	0.0335871	0.157056	1.81614	3.27958	8.23489	Transcription factor RAX3 GN=T16K5.40 OS=Arabidopsis thaliana (Mouse-ear cress) PE=2 SV=1	hypothetical protein POPTR_0006s25060g [Populus trichocarpa]
	VF15494	17.1909	36.9016	72.6323	35.6815	48.0603	641.526	Profilin-2 OS=Betula pendula (European white birch) PE=1 SV=1	hypothetical protein JCGZ_07348 [Jatropha curcas]
	VF15441	0.0535095	0.0142561	0.135796	0.0308789	1.2064	17.6578	Sugar transport protein 14 GN=STP14 OS=Arabidopsis thaliana (Mouse-ear cress) PE=2 SV=2	hypothetical protein JCGZ_07292 [Jatropha curcas]
	VF15431	0.0833049	0.0293842	0.199693	0.067287	0.0373272	437.167	--	hypothetical protein JCGZ_07281 [Jatropha curcas]
	VF15404	3.19967	0.542697	0.505273	4.58463	12.3408	36.4745	Serine/threonine-protein kinase At5g01020 GN=At5g01020 OS=Arabidopsis thaliana (Mouse-ear cress) PE=1 SV=1	hypothetical protein JCGZ_02747 [Jatropha curcas]
	VF15403	0.514173	0.103957	0.15019	0.167301	8.77558e-05	1.50424	Transcription repressor OFP14 GN=OFP14 OS=Arabidopsis thaliana (Mouse-ear cress) PE=1 SV=1	hypothetical protein JCGZ_06263 [Jatropha curcas]
	VF15378	1.11582	1.29997	1.13287	1.6421	1.83724	26.3681	Reticulon-like protein B5 GN=RTNLB5 OS=Arabidopsis thaliana (Mouse-ear cress) PE=1 SV=1	PREDICTED: reticulon-like protein B2 [Populus euphratica]
	VF15367	10.9887	11.5898	13.0768	9.93316	17.0484	40.9012	Calcium uniporter protein 6, mitochondrial (Precursor) OS=Arabidopsis thaliana (Mouse-ear cress) PE=2 SV=1	hypothetical protein JCGZ_17266 [Jatropha curcas]
	VF15323	48.8097	21.6651	33.9194	47.5828	32.5125	105.262	Chaperone protein dnaJ 11, chloroplastic (Precursor) GN=T19K4.170 OS=Arabidopsis thaliana (Mouse-ear cress) PE=1 SV=2	hypothetical protein JCGZ_06545 [Jatropha curcas]
	VF15309	2.66818	0.966693	1.96139	3.04523	3.82604	44.8895	Protein WUSCHEL GN=WUS OS=Petunia hybrida (Petunia) PE=2 SV=1	Protein WUSCHEL, putative [Ricinus communis]
	VF15232	0.777543	0.135619	0	0.53752	0.38782	49.5701	Flavonol synthase/flavanone 3-hydroxylase GN=FL OS=Petunia hybrida (Petunia) PE=2 SV=1	hypothetical protein JCGZ_12060 [Jatropha curcas]
	VF15222	0.655768	0.627242	0.573458	0.722726	0.541543	3.46406	Histone-lysine N-methyltransferase ASHR1 GN=T13L16.8 OS=Arabidopsis thaliana (Mouse-ear cress) PE=2 SV=2	PREDICTED: histone-lysine N-methyltransferase ASHR1-like [Citrus sinensis]
	VF15214	0	0	0	0	0	234.594	--	conserved hypothetical protein [Ricinus communis]
	VF15211	0	0	0	0	0	27.0671	--	conserved hypothetical protein [Ricinus communis]
	VF15190	8.2738	6.0687	6.26714	8.31603	8.74544	18.5717	Chaperone protein dnaJ 11, chloroplastic (Precursor) GN=T19K4.170 OS=Arabidopsis thaliana (Mouse-ear cress) PE=1 SV=2	hypothetical protein JCGZ_12019 [Jatropha curcas]
	VF15172	4.37639	0.462942	0.505955	3.54747	2.18187	19.2902	--	hypothetical protein JCGZ_12001 [Jatropha curcas]
	VF15163	2.22556	2.78122	3.70051	1.75739	2.54574	46.6807	Calcium-transporting ATPase 4, plasma membrane-type GN=ACA4 OS=Arabidopsis thaliana (Mouse-ear cress) PE=1 SV=1	cation-transporting atpase plant, putative [Ricinus communis]
	VF15111	6.96994	9.1856	11.7611	8.61718	11.1656	27.9203	Zeaxanthin epoxidase, chloroplastic (Precursor) GN=OSJNBa0064H22.16 OS=Oryza sativa subsp. japonica (Rice) PE=2 SV=1	hypothetical protein JCGZ_18850 [Jatropha curcas]
	VF15062	0	0	0	4.02127	0	9.06795	Mitochondrial import inner membrane translocase subunit TIM23-1 GN=TIM23-1 OS=Arabidopsis thaliana (Mouse-ear cress) PE=2 SV=1	BnaC05g13650D [Brassica napus]
	VF15057	0	0	0	0	0	2.08015	--	conserved hypothetical protein [Ricinus communis]
	VF14967	0.080702	0	0	0	0.159666	228.648	LIM domain-containing protein WLIM1 {ECO:0000305} OS=Arabidopsis thaliana (Mouse-ear cress) PE=1 SV=1	hypothetical protein JCGZ_16343 [Jatropha curcas]
	VF14903	0	4.55895	2.37477	0	2.41143	14.2271	--	hypothetical protein JCGZ_25405 [Jatropha curcas]
	VF14899	0.261522	0.202319	0.0736717	0.27833	0.15992	1.19416	G-type lectin S-receptor-like serine/threonine-protein kinase At4g03230 (Precursor) GN=At4g03230 OS=Arabidopsis thaliana (Mouse-ear cress) PE=3 SV=3	hypothetical protein POPTR_0019s14250g [Populus trichocarpa]
	VF14897	0.447296	0.447524	0.392773	0.194043	0.378642	2.25999	--	Armadillo repeat only 2 [Theobroma cacao]
	VF14864	0.0588449	0	0	0	0.0165225	172.04	L-ascorbate oxidase homolog (Precursor) GN=Bp10 OS=Brassica napus (Rape) PE=2 SV=1	hypothetical protein JCGZ_16212 [Jatropha curcas]
	VF14861	0.244818	0.261172	0.33886	0.0881981	0.298939	353	Exopolygalacturonase (Precursor; Fragment) OS=Platanus acerifolia (London plane tree) PE=1 SV=1	polygalacturonase [Salix gilgiana]
	VF14860	0.0226053	0	0.12037	0	0	217.355	Exopolygalacturonase (Fragment) OS=Oenothera organensis (Evening primrose) PE=2 SV=1	polygalacturonase [Salix gilgiana]
	VF14810	7.15472	3.05477	9.02308	7.75165	52.9977	2167.15	Putative cell wall protein (Precursor) GN=At2g20870 OS=Arabidopsis thaliana (Mouse-ear cress) PE=2 SV=2	hypothetical protein JCGZ_25825 [Jatropha curcas]
	VF14802	0.100211	0.162692	0.159765	0.282499	0.180635	3.14908	--	hypothetical protein JCGZ_25816 [Jatropha curcas]
	VF14799	0.530516	0.583736	0.363442	0.122588	0.410916	1.25224	--	hypothetical protein JCGZ_25814 [Jatropha curcas]
	VF14775	0.941171	0.413207	0.689205	1.24944	1.13103	21.6903	GPI-anchored protein LORELEI (Precursor) GN=LRE OS=Arabidopsis thaliana (Mouse-ear cress) PE=2 SV=1	conserved hypothetical protein [Ricinus communis]
	VF14762	8.22325	6.70915	5.68743	7.51578	7.91943	17.4169	Probable serine/threonine-protein kinase At1g54610 GN=At1g54610 OS=Arabidopsis thaliana (Mouse-ear cress) PE=1 SV=1	hypothetical protein JCGZ_25775 [Jatropha curcas]
	VF14737	0.140555	0.390625	0.0714855	0	0.067757	33.5931	--	hypothetical protein JCGZ_12991 [Jatropha curcas]
	VF14725	11.7099	6.33541	6.27715	9.43769	29.3123	75.0913	Probable protein phosphatase 2C 58 GN=At4g28400 OS=Arabidopsis thaliana (Mouse-ear cress) PE=2 SV=1	hypothetical protein JCGZ_25755 [Jatropha curcas]
	VF14702	0.416333	1.1081	0.600071	0.478205	1.57109	4.90832	NAC domain-containing protein 8 GN=NAC008 OS=Arabidopsis thaliana (Mouse-ear cress) PE=2 SV=1	transcription factor, putative [Ricinus communis]
	VF14685	0	0.204591	0.551818	0.07812	0.604124	1.39327	Xyloglucan endotransglucosylase/hydrolase protein 22 (Precursor) GN=MUA2.13 OS=Arabidopsis thaliana (Mouse-ear cress) PE=1 SV=1	hypothetical protein JCGZ_08702 [Jatropha curcas]
	VF14620	0.182272	0.22385	0.0480154	0.230374	0.186689	1.27207	Twinkle homolog protein, chloroplastic/mitochondrial (Precursor) GN=At1g30680 OS=Arabidopsis thaliana (Mouse-ear cress) PE=1 SV=1	PREDICTED: twinkle homolog protein, chloroplastic/mitochondrial [Populus euphratica]
	VF14618	0	0	0	0	0.0660415	1.04464	Transcription factor bHLH52 GN=T5I8.12 OS=Arabidopsis thaliana (Mouse-ear cress) PE=2 SV=1	hypothetical protein JCGZ_09132 [Jatropha curcas]
	VF14617	0	0	0	0	0.036507	1.63699	Transcription factor bHLH52 GN=T5I8.12 OS=Arabidopsis thaliana (Mouse-ear cress) PE=2 SV=1	hypothetical protein JCGZ_09132 [Jatropha curcas]
	VF14612	9.78344	5.3606	3.92228	6.44193	9.85489	21.8321	Non-specific lipid-transfer protein D, cotyledon-specific isoform (Precursor) OS=Ricinus communis (Castor bean) PE=3 SV=1	Nonspecific lipid-transfer protein D, cotyledon-specific isoform precursor [Ricinus communis]
	VF14506	0.492084	0.397039	0.576661	0.881466	0.424351	3.84108	Protein UPSTREAM OF FLC GN=UFC OS=Arabidopsis thaliana (Mouse-ear cress) PE=2 SV=1	hypothetical protein JCGZ_05254 [Jatropha curcas]
	VF14417	0	0	0	0	0	12.62	--	hypothetical protein JCGZ_16419 [Jatropha curcas]
	VF14401	0.393879	0.11168	0.179768	0.132701	0.100735	12.5424	Plant intracellular Ras-group-related LRR protein 6 GN=PIRL6 OS=Arabidopsis thaliana (Mouse-ear cress) PE=2 SV=1	hypothetical protein JCGZ_07943 [Jatropha curcas]
	VF14383	0.250585	0.356841	0.535889	0.379458	0.179532	8.22714	Nuclear transcription factor Y subunit B-7 GN=NFYB7 OS=Arabidopsis thaliana (Mouse-ear cress) PE=2 SV=1	hypothetical protein JCGZ_03725 [Jatropha curcas]
	VF14333	2.27115	4.00395	1.36662	1.72786	2.65088	50.4372	Wall-associated receptor kinase-like 14 (Precursor) GN=WAKL14 OS=Arabidopsis thaliana (Mouse-ear cress) PE=2 SV=2	hypothetical protein JCGZ_12301 [Jatropha curcas]
	VF14265	7.35968	1.41665	2.75317	9.20979	208.069	668.44	Probable inactive purple acid phosphatase 27 (Precursor) GN=PAP27 OS=Arabidopsis thaliana (Mouse-ear cress) PE=2 SV=1	hypothetical protein JCGZ_24494 [Jatropha curcas]
	VF14237	14.2392	12.3262	14.3411	10.1293	15.5413	47.0969	--	hypothetical protein JCGZ_24468 [Jatropha curcas]
	VF14226	1.78408	5.15153	3.65078	2.34113	2.99515	17.4565	Alpha-galactosidase (Precursor) OS=Coffea arabica (Arabian coffee) PE=1 SV=1	hypothetical protein JCGZ_24459 [Jatropha curcas]
	VF14188	168.018	253.745	126.052	182.08	418.907	944.557	1-aminocyclopropane-1-carboxylate oxidase GN=ACO OS=Actinidia deliciosa (Kiwi) PE=2 SV=1	1-amino-cyclopropane-1-carboxylic acid oxidase 3 [Manihot esculenta]
	VF14178	2.93824	3.36536	3.73271	2.55842	3.64432	8.89663	--	hypothetical protein JCGZ_16408 [Jatropha curcas]
	VF14176	0	6.1775e-18	1.52289e-54	2.70896e-10	6.87655e-27	2.68365	Ubiquitin-conjugating enzyme E2 11 GN=UBC11 OS=Arabidopsis thaliana (Mouse-ear cress) PE=1 SV=2	hypothetical protein AMTR_s00089p00096280 [Amborella trichopoda]
	VF14158	0.0724255	0.063369	0.110173	0.05821	0	4.65984	Pathogenesis-related protein PR-1 (Precursor) GN=PR-1 OS=Medicago truncatula (Barrel medic) PE=2 SV=1	hypothetical protein JCGZ_16429 [Jatropha curcas]
	VF14115	0.888696	1.95781	2.16909	0.680807	1.25017	13.4631	Probable beta-1,4-xylosyltransferase IRX9 GN=IRX9 OS=Arabidopsis thaliana (Mouse-ear cress) PE=2 SV=1	hypothetical protein JCGZ_16470 [Jatropha curcas]
	VF14107	0	0.0313942	0.229126	0.0851995	0.203166	5.40939	Peroxidase 21 (Precursor) GN=T2N18.11 OS=Arabidopsis thaliana (Mouse-ear cress) PE=1 SV=1	hypothetical protein JCGZ_16485 [Jatropha curcas]
	VF14099	5.48784	5.97691	4.74299	3.25962	4.05492	34.4986	Fasciclin-like arabinogalactan protein 11 (Precursor) GN=FLA11 OS=Arabidopsis thaliana (Mouse-ear cress) PE=2 SV=2	conserved hypothetical protein [Ricinus communis]
	VF14085	2.13424	4.69756	6.04066	2.65761	3.11947	38.9428	--	conserved hypothetical protein [Ricinus communis]
	VF14039	0.0218908	0	0.0271252	0.028679	0.026224	4.0587	--	acylphosphatase, putative [Ricinus communis]
	VF14005	0.335801	0.796455	0.349711	0.829282	0.50759	20.5127	Probable purple acid phosphatase 20 (Precursor) GN=F3C22.180 OS=Arabidopsis thaliana (Mouse-ear cress) PE=2 SV=1	hypothetical protein JCGZ_23671 [Jatropha curcas]
	VF14004	0.221051	0.527534	0.381299	0.237942	0.334121	28.5752	Purple acid phosphatase 22 (Precursor) GN=F3C22.220 OS=Arabidopsis thaliana (Mouse-ear cress) PE=2 SV=1	calcineurin-like phosphoesterase [Manihot esculenta]
	VF13993	0.18861	0.165352	1.05132	0.191404	97.1538	334.259	Xylem serine proteinase 1 (Precursor) GN=XSP1 OS=Arabidopsis thaliana (Mouse-ear cress) PE=2 SV=1	hypothetical protein JCGZ_23659 [Jatropha curcas]
	VF13991	0.044007	0.523128	0.911258	0	1.09883	18.3472	Histidine-containing phosphotransfer protein 1 GN=OJ1155_H10.30 OS=Oryza sativa subsp. japonica (Rice) PE=1 SV=1	Histidine-containing phosphotransfer protein, putative [Ricinus communis]
	VF13988	113.045	124.874	129.217	143.107	158.478	430.865	Monodehydroascorbate reductase OS=Solanum lycopersicum (Tomato) PE=1 SV=1	hypothetical protein JCGZ_23654 [Jatropha curcas]
	VF13983	2.65251	2.46391	1.26676	2.73188	2.21136	9.18517	ABC transporter G family member 39 OS=Arabidopsis thaliana (Mouse-ear cress) PE=3 SV=1	PREDICTED: pleiotropic drug resistance protein 2-like [Eucalyptus grandis]
	VF13968	47.7438	16.9186	19.9813	45.6484	45.3045	472.438	Phytosulfokine-beta (Precursor) GN=T32N15.2 OS=Arabidopsis thaliana (Mouse-ear cress) PE=2 SV=2	PREDICTED: putative phytosulfokines 6 [Vitis vinifera]
	VF13953	24.3407	34.2441	29.4557	23.4408	23.9451	243.076	Glucomannan 4-beta-mannosyltransferase 9 GN=F17C15.180 OS=Arabidopsis thaliana (Mouse-ear cress) PE=2 SV=1	hypothetical protein JCGZ_23699 [Jatropha curcas]
	VF13920	0.0336226	0	0	0	0	159.295	Probable polygalacturonase OS=Vitis vinifera (Grape) PE=1 SV=1	hypothetical protein JCGZ_26058 [Jatropha curcas]
	VF13854	5.62891	2.69467	2.38174	7.6635	6.58512	125.631	Antimicrobial peptide 2d (Precursor) OS=Macadamia integrifolia (Macadamia nut) PE=2 SV=1	hypothetical protein POPTR_0009s05950g [Populus trichocarpa]
	VF13841	1.18183	0.160942	0.393708	1.48553	1.85655	20.5002	Branched-chain-amino-acid aminotransferase 2, chloroplastic (Precursor) GN=BCAT2 OS=Arabidopsis thaliana (Mouse-ear cress) PE=1 SV=1	branched-chain amino acid aminotransferase, putative [Ricinus communis]
	VF13832	0.199477	0.490451	0.338388	0.317609	0.147692	8.2036	MEPFL2 {ECO:0000305} (Precursor) GN=T28I19.4 OS=Arabidopsis thaliana (Mouse-ear cress) PE=2 SV=1	conserved hypothetical protein [Ricinus communis]
	VF13819	4.51138	7.49744	4.34211	7.68288	6.34572	31.0275	--	hypothetical protein JCGZ_18320 [Jatropha curcas]
	VF13758	1.78684	1.57144	2.65994	1.59838	1.70013	20.6274	Protein TRANSPARENT TESTA 12 GN=F17J16_80 OS=Arabidopsis thaliana (Mouse-ear cress) PE=2 SV=1	hypothetical protein JCGZ_15844 [Jatropha curcas]
	VF13756	0.308036	0.106187	0.372614	0	0.145552	3.24021	Probable 2-oxoglutarate/Fe(II)-dependent dioxygenase GN=DIOX2 OS=Papaver somniferum (Opium poppy) PE=2 SV=1	Flavonol synthase/flavanone 3-hydroxylase, putative [Ricinus communis]
	VF13752	1.72093	2.9912	0.866363	1.61978	1.68588	6.87011	RING-H2 finger protein ATL54 GN=ATL54 OS=Arabidopsis thaliana (Mouse-ear cress) PE=2 SV=2	ring finger protein, putative [Ricinus communis]
	VF13731	1.30839	1.98792	0.701707	0.806168	5.95798	2701.76	Gibberellin-regulated protein 11 (Precursor) GN=GASA11 OS=Arabidopsis thaliana (Mouse-ear cress) PE=3 SV=1	PREDICTED: gibberellin-regulated protein 2 [Populus euphratica]
	VF13669	0.453066	1.59844	2.13435	0.364034	0.554455	4.43472	Cytochrome P450 71B10 GN=CYP71B10 OS=Arabidopsis thaliana (Mouse-ear cress) PE=3 SV=1	cytochrome P450, putative [Ricinus communis]
	VF13626	27.7431	26.1152	32.8587	26.2517	40.6461	87.6261	--	hypothetical protein JCGZ_17819 [Jatropha curcas]
	VF13581	6.49073	0.139307	0.153126	11.2631	2.41262	91.2303	Alcohol dehydrogenase-like 3 GN=At1g32780 OS=Arabidopsis thaliana (Mouse-ear cress) PE=2 SV=1	hypothetical protein JCGZ_15472 [Jatropha curcas]
	VF13580	0	0.317024	0.150478	0	0.2045	17.3238	NAC domain-containing protein 43 GN=F19D11.5 OS=Arabidopsis thaliana (Mouse-ear cress) PE=2 SV=2	NAC domain-containing protein, putative [Ricinus communis]
	VF13566	4.44761	1.94483	2.29213	5.89639	4.29963	14.8725	Mediator of RNA polymerase II transcription subunit 10b GN=T24P13.4 OS=Arabidopsis thaliana (Mouse-ear cress) PE=1 SV=1	nut2, putative [Ricinus communis]
	VF13533	9.81388	9.1756	5.79014	10.8337	11.2234	26.9165	Short-chain dehydrogenase TIC 32, chloroplastic GN=TIC32 OS=Pisum sativum (Garden pea) PE=1 SV=1	hypothetical protein JCGZ_20404 [Jatropha curcas]
	VF13487	46.9013	31.0367	28.4244	51.2259	76.379	172.493	UDP-glucose 4-epimerase GEPI48 OS=Cyamopsis tetragonoloba (Guar) PE=2 SV=1	hypothetical protein JCGZ_20444 [Jatropha curcas]
	VF13426	0.0355003	0.50186	0.44415	0.0326219	0.356757	18.016	Protein ODORANT1 GN=ODO1 OS=Petunia hybrida (Petunia) PE=2 SV=1	hypothetical protein JCGZ_20768 [Jatropha curcas]
	VF13424	0.610613	0.470802	0.314475	0.724413	0.85267	2.5905	Cytochrome P450 93A3 GN=CYP93A3 OS=Glycine max (Soybean) PE=2 SV=1	cytochrome P450, putative [Ricinus communis]
	VF13410	0.091103	0.18694	0.534735	0.278692	0.198302	1.59017	Transcription factor bHLH25 GN=T28I19.130 OS=Arabidopsis thaliana (Mouse-ear cress) PE=2 SV=2	hypothetical protein JCGZ_09890 [Jatropha curcas]
	VF13407	0	0	0	0	0	1.68976	Pectinesterase PPME1 (Precursor) GN=T17F3.3 OS=Arabidopsis thaliana (Mouse-ear cress) PE=1 SV=1	Pectinesterase-1 precursor, putative [Ricinus communis]
	VF13368	0.01615	0	0	0.0477124	0.0118446	4.58006	Cation/H(+) antiporter 24 GN=CHX24 OS=Arabidopsis thaliana (Mouse-ear cress) PE=2 SV=2	hypothetical protein JCGZ_17357 [Jatropha curcas]
	VF13323	0	0	0	0	0	1.45141	--	hypothetical protein POPTR_0018s11350g [Populus trichocarpa]
	VF13289	0	0	0	0	0.0126292	1.26501	Probable LRR receptor-like serine/threonine-protein kinase RLK (Precursor) GN=RLK OS=Arabidopsis thaliana (Mouse-ear cress) PE=2 SV=1	leucine-rich repeat transmembrane protein kinase, putative [Ricinus communis]
	VF13256	0.800111	1.2417	1.66682	0.804786	1.36808	58.9255	Guanosine nucleotide diphosphate dissociation inhibitor At5g09550 GN=At5g09550 OS=Arabidopsis thaliana (Mouse-ear cress) PE=3 SV=1	protein with unknown function [Ricinus communis]
	VF13192	0.281292	0.0468538	0.119017	0.16097	6.87479	38.3284	Glycerophosphodiester phosphodiesterase GDPDL6 {ECO:0000305} (Precursor) OS=Arabidopsis thaliana (Mouse-ear cress) PE=2 SV=1	glycerophosphoryl diester phosphodiesterase, putative [Ricinus communis]
	VF13188	5.90831	5.15993	2.97076	7.25947	14.4681	69.6161	--	hypothetical protein POPTR_0004s17500g [Populus trichocarpa]
	VF13181	77.6531	58.4324	17.0754	86.9796	43.5653	911.561	Proline-rich protein 4 (Precursor) GN=PRP4 OS=Arabidopsis thaliana (Mouse-ear cress) PE=2 SV=1	PREDICTED: proline-rich protein 4 [Populus euphratica]
	VF13162	2.99993	1.13443	1.06351	1.5379	1.39144	9.90175	Probable polyamine transporter At1g31830 GN=At1g31830 OS=Arabidopsis thaliana (Mouse-ear cress) PE=2 SV=1	hypothetical protein JCGZ_13076 [Jatropha curcas]
	VF13156	0.884098	0.294584	0.154738	1.59531	1.28769	4.31742	LOB domain-containing protein 22 GN=MCP4.8 OS=Arabidopsis thaliana (Mouse-ear cress) PE=2 SV=1	hypothetical protein JCGZ_07664 [Jatropha curcas]
	VF13131	0.881492	0.631743	0.84328	1.2631	1.81346	8.98188	Serine/threonine-protein kinase GN=PUB34 OS=Arabidopsis thaliana (Mouse-ear cress) PE=3 SV=1	kinase, putative [Ricinus communis]
	VF13118	0.0633775	0.106924	1.13603	0.053725	0.0965045	32.2979	Defensin-like protein (Precursor) OS=Glycine max (Soybean) PE=3 SV=1	unknown [Glycine max]
	VF13045	19.137	18.9026	21.4939	19.8107	23.2553	49.2615	--	hypothetical protein JCGZ_02493 [Jatropha curcas]
	VF13040	0	0	0.0411239	0.0435644	4.1591	16.6944	Probable aquaporin NIP-type OS=Nicotiana alata (Winged tobacco) PE=2 SV=1	hypothetical protein JCGZ_02488 [Jatropha curcas]
	VF13039	1.82435	3.44848	4.39647	1.44411	1.16796	13.9826	--	N-acetyltransferase, putative [Ricinus communis]
	VF12985	0.0738185	0	0	0	0.0551635	1.63888	Auxin-induced protein X10A OS=Glycine max (Soybean) PE=2 SV=1	hypothetical protein VITISV_014160 [Vitis vinifera]
	VF12926	7.76774	5.98394	6.71243	5.34496	4.89277	25.5765	Zinc finger CCCH domain-containing protein 18 GN=At2g05160 OS=Arabidopsis thaliana (Mouse-ear cress) PE=2 SV=1	hypothetical protein JCGZ_00999 [Jatropha curcas]
	VF12834	11.1517	16.3073	16.8288	8.96195	14.8802	53.5664	WAT1-related protein At1g21890 GN=At1g21890 OS=Arabidopsis thaliana (Mouse-ear cress) PE=2 SV=1	hypothetical protein JCGZ_12077 [Jatropha curcas]
	VF12667	0	0	0	0	0	20.5638	UDP-glycosyltransferase 86A2 GN=UGT86A2 OS=Arabidopsis thaliana (Mouse-ear cress) PE=2 SV=1	hypothetical protein JCGZ_05460 [Jatropha curcas]
	VF12654	9.53206	12.0708	12.2907	15.7142	28.5158	63.2717	S-adenosylmethionine synthase 1 OS=Vitis vinifera (Grape) PE=3 SV=1	PREDICTED: S-adenosylmethionine synthase 1 isoform X1 [Vitis vinifera]
	VF12652	33.7553	25.7947	29.4135	27.5858	27.9901	690.407	Serine carboxypeptidase 3 (Precursor) GN=CBP3 OS=Hordeum vulgare (Barley) PE=1 SV=2	hypothetical protein JCGZ_05447 [Jatropha curcas]
	VF12612	6.10037	1.17507	0.370052	9.799	13.0724	73.6746	Alpha carbonic anhydrase 4 (Precursor) GN=ACA4 OS=Arabidopsis thaliana (Mouse-ear cress) PE=3 SV=1	PREDICTED: alpha carbonic anhydrase 4-like, partial [Populus euphratica]
	VF12589	0.150358	0.329045	0.940132	0.0568303	26.1905	301.985	Alpha-L-arabinofuranosidase (Precursor) OS=Medicago sativa subsp. varia (Alfalfa) PE=2 SV=1	hydrolase, hydrolyzing O-glycosyl compounds, putative [Ricinus communis]
	VF12550	57.5168	47.9032	34.5328	67.1585	36.6545	419.699	Dehydration-responsive protein RD22 (Precursor) GN=RD22 OS=Arabidopsis thaliana (Mouse-ear cress) PE=2 SV=1	hypothetical protein JCGZ_07792 [Jatropha curcas]
	VF12483	0.105222	0.550817	0.335881	0.439407	0.71168	3.11911	Ras-related protein RABA6a GN=RABA6A OS=Arabidopsis thaliana (Mouse-ear cress) PE=2 SV=1	hypothetical protein JCGZ_03636 [Jatropha curcas]
	VF12398	17.4524	28.7185	34.1901	15.7831	27.2813	75.3002	3beta-hydroxysteroid-dehydrogenase/decarboxylase isoform 2 GN=T1D16.10 OS=Arabidopsis thaliana (Mouse-ear cress) PE=2 SV=2	hypothetical protein JCGZ_07578 [Jatropha curcas]
	VF12308	17.9028	15.4206	21.171	21.0287	21.042	57.1023	Probable pyridoxal biosynthesis protein PDX1 GN=PDX1 OS=Hevea brasiliensis (Para rubber tree) PE=2 SV=1	hypothetical protein JCGZ_25012 [Jatropha curcas]
	VF12299	1.07588	0.605291	0.0357719	1.3928	0.602855	3.33327	Leucoanthocyanidin dioxygenase GN=ANS OS=Malus domestica (Apple) PE=2 SV=1	hypothetical protein JCGZ_25005 [Jatropha curcas]
	VF12276	43.4074	38.2196	50.0461	53.1158	42.1923	218.474	Pyruvate decarboxylase 1 GN=PDC1 OS=Arabidopsis thaliana (Mouse-ear cress) PE=2 SV=1	hypothetical protein JCGZ_00450 [Jatropha curcas]
	VF12248	0.477913	0.898095	0.252177	0.423153	0.988296	20.8402	Protein trichome birefringence-like 34 GN=TBL34 OS=Arabidopsis thaliana (Mouse-ear cress) PE=2 SV=2	PREDICTED: protein trichome birefringence-like 34 [Populus euphratica]
	VF12210	0.0742615	0.283466	0	0.367957	2.0471	7.14781	--	hypothetical protein JCGZ_08879 [Jatropha curcas]
	VF12046	0.863768	0.276373	0.206328	2.02315	57.1499	127.219	NAC transcription factor 25 GN=At1g61110 OS=Arabidopsis thaliana (Mouse-ear cress) PE=2 SV=1	NAC transcription factor 029 [Jatropha curcas]
	VF12028	0.282445	0.12889	1.41977	0.381236	0.424233	5.4754	Zinc finger protein CONSTANS-LIKE 4 GN=COL4 OS=Arabidopsis thaliana (Mouse-ear cress) PE=2 SV=2	hypothetical protein JCGZ_12861 [Jatropha curcas]
	VF11978	0	0	0	0	0	17.4917	AP-1 complex subunit sigma-1 GN=AAP19-1 OS=Arabidopsis thaliana (Mouse-ear cress) PE=1 SV=1	PREDICTED: AP-1 complex subunit sigma-2 [Cucumis melo]
	VF11949	1.30849	1.90741	2.23386	1.83838	3.86445	73.0493	Protein IQ-DOMAIN 1 GN=IQD1 OS=Arabidopsis thaliana (Mouse-ear cress) PE=1 SV=1	hypothetical protein JCGZ_09839 [Jatropha curcas]
	VF11946	0.383187	1.39239	1.69593	0.485865	1.61278	4.52914	--	hypothetical protein CICLE_v10007809mg [Citrus clementina]
	VF11927	0.923478	1.40698	0.889695	1.43828	1.06834	131.501	--	hypothetical protein JCGZ_07164 [Jatropha curcas]
	VF11906	0.680248	1.71122	7.52319	0.518888	6.40639	16.0268	Probable glycosyltransferase At5g25310 GN=At5g25310 OS=Arabidopsis thaliana (Mouse-ear cress) PE=3 SV=2	catalytic, putative [Ricinus communis]
	VF11894	0.11546	0.099544	0.171907	0	0.345757	1.63808	--	hypothetical protein JCGZ_07133 [Jatropha curcas]
	VF11865	0.808009	1.20594	0.826465	1.69876	0.803182	6.12235	Ethylene-responsive transcription factor ERF003 GN=ERF003 OS=Arabidopsis thaliana (Mouse-ear cress) PE=2 SV=1	Protein PPLZ02, putative [Ricinus communis]
	VF11858	0.144832	0.462489	0.624036	0.10451	0.740522	34.2877	Omega-hydroxypalmitate O-feruloyl transferase GN=MEE6.11 OS=Arabidopsis thaliana (Mouse-ear cress) PE=1 SV=1	transferase, putative [Ricinus communis]
	VF11837	1.51113	0	0.239202	0.267222	0.241858	3.2931	--	conserved hypothetical protein [Ricinus communis]
	VF11820	0.319393	2.3502	0.597379	0	0.168207	14.8009	--	hypothetical protein JCGZ_07064 [Jatropha curcas]
	VF11811	3.43064	1.56654	1.05213	8.25675	10.5469	69.0236	Protein ASPARTIC PROTEASE IN GUARD CELL 2 (Precursor) GN=ASPG2 OS=Arabidopsis thaliana (Mouse-ear cress) PE=2 SV=1	hypothetical protein JCGZ_07056 [Jatropha curcas]
	VF11785	0	0	0	0	0	3.84581	UDP-4-keto-6-deoxy-D-glucose 3,5-epimerase/UDP-4-keto-L-rhamnose 4-keto-reductase {ECO:0000305|PubMed:17190829} GN=At1g78570 OS=Arabidopsis thaliana (Mouse-ear cress) PE=1 SV=1	hypothetical protein POPTR_0006s28750g [Populus trichocarpa]
	VF11779	0.164074	0.263359	0.869742	0.0431799	0.232004	1.77943	Beta-amyrin 28-oxidase OS=Panax ginseng (Korean ginseng) PE=2 SV=1	cytochrome P450, putative [Ricinus communis]
	VF11768	0.105921	0.226997	0.120756	0.0719272	0.100287	8.04293	--	conserved hypothetical protein [Ricinus communis]
	VF11766	6.26715	9.79246	6.73616	9.03862	9.46459	373.757	Fasciclin-like arabinogalactan protein 3 (Precursor) GN=FLA3 OS=Arabidopsis thaliana (Mouse-ear cress) PE=2 SV=1	hypothetical protein JCGZ_07006 [Jatropha curcas]
	VF11756	16.6193	25.0631	23.0431	21.961	41.9762	110.709	Plasma membrane ATPase 4 GN=PMA4 OS=Nicotiana plumbaginifolia (Leadwort-leaved tobacco) PE=2 SV=1	hypothetical protein JCGZ_07016 [Jatropha curcas]
	VF11753	6.93477	4.37468	4.22487	10.0572	8.66915	21.8044	Probable E3 ubiquitin-protein ligase HIP1 OS=Oryza sativa subsp. japonica (Rice) PE=1 SV=2	hypothetical protein JCGZ_07019 [Jatropha curcas]
	VF11731	0.864172	0.879091	1.10097	1.23545	0.415245	2.69365	--	PREDICTED: uncharacterized protein LOC105136996 isoform X1 [Populus euphratica]
	VF11727	0.29247	0.199315	0.0798446	0.0819831	0.791692	22.9467	Gibberellin 2-beta-dioxygenase 2 GN=GA2OX2 OS=Pisum sativum (Garden pea) PE=2 SV=1	hypothetical protein JCGZ_14065 [Jatropha curcas]
	VF11694	0	0.0440073	0	0.0416919	0	1.34245	--	PREDICTED: uncharacterized protein LOC104881134 [Vitis vinifera]
	VF11685	1.78798	2.11326	1.86442	1.08152	1.11381	13.2546	Protein RADIALIS-like 3 GN=RL3 OS=Arabidopsis thaliana (Mouse-ear cress) PE=2 SV=1	hypothetical protein POPTR_0002s18920g [Populus trichocarpa]
	VF11682	14.9311	18.009	22.0974	18.6441	20.1756	62.5297	--	hypothetical protein JCGZ_14104 [Jatropha curcas]
	VF11679	5.67108	4.52785	2.29647	4.39159	5.74431	20.6422	ABC transporter B family member 11 GN=T14P4.15 OS=Arabidopsis thaliana (Mouse-ear cress) PE=2 SV=1	hypothetical protein JCGZ_14106 [Jatropha curcas]
	VF11658	0.596376	0.644834	1.31335	0.389453	0.630059	2.94346	Cytochrome P450 734A6 GN=OSJNBb0008D07.26 OS=Oryza sativa subsp. japonica (Rice) PE=2 SV=1	hypothetical protein JCGZ_14126 [Jatropha curcas]
	VF11650	5.18235	5.43677	3.51573	7.26475	10.3233	34.3358	--	catalytic, putative [Ricinus communis]
	VF11641	4.76215	8.28235	6.23179	4.68088	4.41607	26.3854	Glucose-1-phosphate adenylyltransferase large subunit 2, chloroplastic (Precursor) GN=APL2 OS=Arabidopsis thaliana (Mouse-ear cress) PE=2 SV=2	hypothetical protein JCGZ_14143 [Jatropha curcas]
	VF11615	30.954	36.1174	45.6963	52.208	64.4007	193.138	Soluble inorganic pyrophosphatase GN=PPA OS=Solanum tuberosum (Potato) PE=2 SV=1	hypothetical protein JCGZ_14171 [Jatropha curcas]
	VF11582	0	0.159709	0	0.152487	1.80109	4.54087	--	conserved hypothetical protein [Ricinus communis]
	VF11519	0	0	0	0	0	10.2458	--	hypothetical protein JCGZ_27126 [Jatropha curcas]
	VF11483	12.8828	17.6561	15.7717	19.4701	24.8357	62.2626	Plasma membrane ATPase 4 GN=PMA4 OS=Nicotiana plumbaginifolia (Leadwort-leaved tobacco) PE=2 SV=1	hypothetical protein JCGZ_10367 [Jatropha curcas]
	VF11451	10.5076	11.4416	5.97989	14.5948	9.61102	31.861	--	hypothetical protein JCGZ_13338 [Jatropha curcas]
	VF11437	25.1775	24.9757	33.5732	28.2028	19.6676	96.6272	Probable NAD(P)H dehydrogenase (quinone) FQR1-like 1 {ECO:0000305} OS=Arabidopsis thaliana (Mouse-ear cress) PE=2 SV=1	hypothetical protein JCGZ_21312 [Jatropha curcas]
	VF11353	2.6992	3.11537	2.96709	1.41642	2.26769	38.3073	Cysteine-rich repeat secretory protein 15 (Precursor) GN=CRRSP15 OS=Arabidopsis thaliana (Mouse-ear cress) PE=1 SV=1	hypothetical protein JCGZ_14552 [Jatropha curcas]
	VF11345	0	1.09256	0	0.713325	2.32248	5.1497	Putative lipid-binding protein At4g00165 (Precursor) GN=At4g00165 OS=Arabidopsis thaliana (Mouse-ear cress) PE=2 SV=1	14 kDa proline-rich protein DC2.15 precursor, putative [Ricinus communis]
	VF11322	0.758451	0.494587	0.559953	0.8009	0.845296	2.09812	Transcription factor UNE10 GN=F6N15.11 OS=Arabidopsis thaliana (Mouse-ear cress) PE=2 SV=1	hypothetical protein JCGZ_14576 [Jatropha curcas]
	VF11309	62.5025	34.2191	38.4807	58.6264	63.8237	285.176	--	hypothetical protein JCGZ_05078 [Jatropha curcas]
	VF11289	7.36823	7.13517	8.22427	6.84641	5.35142	18.1324	--	hypothetical protein RCOM_1177160 [Ricinus communis]
	VF11288	0.28194	0	0.131628	0.319907	0.184268	1.78441	Transcription factor GAMYB GN=GAM1 OS=Oryza sativa subsp. indica (Rice) PE=2 SV=1	r2r3-myb transcription factor, putative [Ricinus communis]
	VF11266	0.158317	0.507265	0.564613	0.121233	0.580886	2.40286	Ethylene-responsive transcription factor 1A OS=Arabidopsis thaliana (Mouse-ear cress) PE=1 SV=2	hypothetical protein JCGZ_14624 [Jatropha curcas]
	VF11237	0	0.0187391	0.0341415	0	0	5.27473	Ankyrin repeat-containing protein At3g12360 GN=At3g12360 OS=Arabidopsis thaliana (Mouse-ear cress) PE=2 SV=1	hypothetical protein JCGZ_14654 [Jatropha curcas]
	VF11133	4.32968	2.25292	2.30703	3.89432	1.45729	11.8348	Polygalacturonase QRT3 (Precursor) GN=QRT3 OS=Arabidopsis thaliana (Mouse-ear cress) PE=2 SV=1	Pectin lyase-like superfamily protein isoform 1 [Theobroma cacao]
	VF11117	0	0.760465	0.237178	0	0	1.67227	Alpha-amylase/subtilisin inhibitor (Precursor) GN=OSJNBa0038O10.14 OS=Oryza sativa subsp. japonica (Rice) PE=1 SV=2	hypothetical protein JCGZ_21015 [Jatropha curcas]
	VF11111	0.306791	0	0.0455583	0.502894	0.572976	155.361	Xylem serine proteinase 1 (Precursor) GN=XSP1 OS=Arabidopsis thaliana (Mouse-ear cress) PE=2 SV=1	hypothetical protein JCGZ_21014 [Jatropha curcas]
	VF11102	15.0376	19.5234	7.93986	17.0004	14.7618	49.4051	UDP-glycosyltransferase 74D1 GN=F20M17.21 OS=Arabidopsis thaliana (Mouse-ear cress) PE=1 SV=1	PREDICTED: UDP-glycosyltransferase 74F2-like isoform X2 [Solanum lycopersicum]
	VF11081	25.954	19.9315	7.99804	21.3717	29.9464	105.227	Cytochrome P450 77A3 GN=CYP77A3 OS=Glycine max (Soybean) PE=2 SV=1	hypothetical protein JCGZ_21248 [Jatropha curcas]
	VF11075	2.22652	0.41325	1.02289	1.13383	5.2403	5115.56	--	hypothetical protein JCGZ_26890 [Jatropha curcas]
	VF11067	0.0840655	0.107347	0.0572258	0.124931	0	5.02846	18 kDa seed maturation protein GN=GMPM1 OS=Glycine max (Soybean) PE=2 SV=1	hypothetical protein JCGZ_25536 [Jatropha curcas]
	VF11050	0.23939	0.22961	0.31315	0.221375	0.206952	1.57751	Aquaporin NIP2-1 OS=Oryza sativa subsp. japonica (Rice) PE=1 SV=1	Silicon transporter, putative [Ricinus communis]
	VF11033	0	0	0.0119448	0.0162687	0.0147961	9.52527	Fumarate hydratase 2, chloroplastic (Precursor) GN=FUM2 OS=Arabidopsis thaliana (Mouse-ear cress) PE=2 SV=1	hypothetical protein JCGZ_13975 [Jatropha curcas]
	VF11019	5.93193	10.4002	11.8757	6.28035	9.82881	63.8751	4-coumarate--CoA ligase 1 GN=4CL1 OS=Nicotiana tabacum (Common tobacco) PE=2 SV=1	hypothetical protein JCGZ_26923 [Jatropha curcas]
	VF10970	21.5692	33.299	33.2929	30.7265	32.1011	70.2752	GDSL esterase/lipase CPRD49 (Precursor) GN=CPRD49 OS=Arabidopsis thaliana (Mouse-ear cress) PE=2 SV=1	Isoamyl acetate-hydrolyzing esterase, putative [Ricinus communis]
	VF10948	0.552065	0.0932849	0.212218	0.416556	0.519899	2.17791	Anthocyanidin 3-O-glucosyltransferase GN=RT OS=Petunia hybrida (Petunia) PE=2 SV=1	UDP-glucosyltransferase, putative [Ricinus communis]
	VF10942	0.188598	0.379412	0.128822	0.473577	1.15871	8.83333	Putative quinone-oxidoreductase homolog, chloroplastic GN=At4g13010 OS=Arabidopsis thaliana (Mouse-ear cress) PE=2 SV=1	hypothetical protein JCGZ_15147 [Jatropha curcas]
	VF10914	0	0	0	0	0	11.6581	Calmodulin-like protein 3 GN=CML3 OS=Arabidopsis thaliana (Mouse-ear cress) PE=2 SV=1	hypothetical protein JCGZ_15100 [Jatropha curcas]
	VF10909	101.574	49.2286	64.389	54.8895	92.1198	543.923	Serine carboxypeptidase-like 20 (Precursor) GN=SCPL20 OS=Arabidopsis thaliana (Mouse-ear cress) PE=2 SV=2	hypothetical protein JCGZ_15106 [Jatropha curcas]
	VF10872	0.200695	0.061697	1.34551e-14	3.7288e-34	1.69775e-18	1.59456	UDP-glycosyltransferase 71C5 GN=UGT71C5 OS=Arabidopsis thaliana (Mouse-ear cress) PE=2 SV=1	UDP-glucosyltransferase, putative [Ricinus communis]
	VF10868	1.17596	1.3972	0.706476	0.828107	4.68162	405.587	Phosphoglucan, water dikinase, chloroplastic (Precursor) OS=Arabidopsis thaliana (Mouse-ear cress) PE=1 SV=1	hypothetical protein JCGZ_08481 [Jatropha curcas]
	VF10860	0.272374	0.310372	0.272754	0.320351	2.11718	16.1715	ABC transporter G family member 31 GN=F23F1.14 OS=Arabidopsis thaliana (Mouse-ear cress) PE=1 SV=1	ATP-binding cassette transporter, putative [Ricinus communis]
	VF10834	4.85734	3.10769	5.38419	5.97888	3.83755	14.1657	Probable aquaporin TIP3-2, N-terminally processed GN=TIP3-2 OS=Arabidopsis thaliana (Mouse-ear cress) PE=2 SV=1	tonoplast intrinsic protein, putative [Ricinus communis]
	VF10795	0.079357	0.276282	0.196019	0	0.263017	2.15664	--	hypothetical protein JCGZ_24932 [Jatropha curcas]
	VF10705	2.35502	3.815	3.31214	2.15774	5.55639	11.618	Omega-hydroxypalmitate O-feruloyl transferase GN=MEE6.11 OS=Arabidopsis thaliana (Mouse-ear cress) PE=1 SV=1	Anthranilate N-benzoyltransferase protein, putative [Ricinus communis]
	VF10683	0.687068	1.21184	4.16927	0.462835	0.278996	8.42075	L-ascorbate oxidase homolog (Precursor) OS=Nicotiana tabacum (Common tobacco) PE=1 SV=1	hypothetical protein JCGZ_00042 [Jatropha curcas]
	VF10575	0	0	0	0.0213177	0	2.15448	Putative MO25-like protein At5g47540 GN=At5g47540 OS=Arabidopsis thaliana (Mouse-ear cress) PE=2 SV=1	hypothetical protein JCGZ_18456 [Jatropha curcas]
	VF10527	0.441594	0.643655	0.704401	0.638575	1.21574	34.6685	Phosphatidylinositol/phosphatidylcholine transfer protein SFH3 GN=SFH3 OS=Arabidopsis thaliana (Mouse-ear cress) PE=2 SV=1	Sec14 cytosolic factor, putative [Ricinus communis]
	VF10482	0.416086	0.0587107	0.477754	0.312263	0.321791	2.97506	Secoisolariciresinol dehydrogenase (Fragment) OS=Forsythia intermedia (Border forsythia) PE=1 SV=1	hypothetical protein JCGZ_08739 [Jatropha curcas]
	VF10369	1.47128	0.717837	1.25031	1.2288	16.5012	61.823	Purple acid phosphatase 25 (Precursor) OS=Arabidopsis thaliana (Mouse-ear cress) PE=2 SV=2	Purple acid phosphatase precursor, putative [Ricinus communis]
	VF10364	1.32205	0.648751	0.664241	1.0401	1.48592	41.8806	Probable methyltransferase PMT27 GN=At3g51070 OS=Arabidopsis thaliana (Mouse-ear cress) PE=3 SV=1	ATP binding protein, putative [Ricinus communis]
	VF10359	115.693	61.583	21.2153	100.595	132.18	296.212	Floral homeotic protein DEFICIENS GN=DEFA OS=Antirrhinum majus (Garden snapdragon) PE=1 SV=1	hypothetical protein JCGZ_13660 [Jatropha curcas]
	VF10265	0	0	0	0	0	7.71463	Expansin-A7 (Precursor) OS=Arabidopsis thaliana (Mouse-ear cress) PE=3 SV=1	hypothetical protein JCGZ_20691 [Jatropha curcas]
	VF10238	0.128836	0	0	0	0	518.452	Putative invertase inhibitor (Precursor) OS=Platanus acerifolia (London plane tree) PE=1 SV=1	hypothetical protein JCGZ_23288 [Jatropha curcas]
	VF10231	12.5071	15.42	4.60487	20.0616	23.9427	48.9007	--	hypothetical protein JCGZ_07587 [Jatropha curcas]
	VF10230	0.812067	2.44131	0.401366	0.284044	0.334616	5.72453	Putative receptor-like protein kinase At1g72540 GN=At1g72540 OS=Arabidopsis thaliana (Mouse-ear cress) PE=2 SV=1	hypothetical protein JCGZ_07586 [Jatropha curcas]
	VF10229	4.9291	7.34545	14.8114	12.469	9.90488	41.347	Copper transporter 5 GN=COPT5 OS=Arabidopsis thaliana (Mouse-ear cress) PE=1 SV=1	hypothetical protein JCGZ_07585 [Jatropha curcas]
	VF10226	10.7538	10.0587	7.94658	9.06556	3.76839	48.5117	--	conserved hypothetical protein [Ricinus communis]
	VF10202	2.05244	3.6962	9.51906	3.56734	3.07279	34.4727	Peroxidase 15 {ECO:0000303|PubMed:17936696} (Precursor) OS=Ipomoea batatas (Sweet potato) PE=1 SV=1	hypothetical protein JCGZ_19168 [Jatropha curcas]
	VF10181	70.4788	52.7378	58.337	78.3887	52.6879	271.673	Polcalcin Bet v 4 GN=BETV4 OS=Betula pendula (European white birch) PE=1 SV=1	hypothetical protein JCGZ_13424 [Jatropha curcas]
	VF10116	0	0.114225	0.0278778	0	0.0210297	1.43001	WAT1-related protein At4g30420 GN=At4g30420 OS=Arabidopsis thaliana (Mouse-ear cress) PE=3 SV=1	hypothetical protein JCGZ_04112 [Jatropha curcas]
	VF10101	5.7948e-30	0.066912	8.4849e-63	0.0231985	5.9662e-26	1.73751	Receptor-like protein kinase HSL1 (Precursor) GN=HSL1 OS=Arabidopsis thaliana (Mouse-ear cress) PE=2 SV=1	hypothetical protein JCGZ_07749 [Jatropha curcas]
	VF10070	9.25503	8.90969	6.4903	8.88113	7.9662	64.2576	Probable fructokinase-7 OS=Arabidopsis thaliana (Mouse-ear cress) PE=1 SV=1	hypothetical protein JCGZ_14483 [Jatropha curcas]
	VF10065	4.63255	2.50602	2.64955	29.1238	8.80724	71.8702	Gibberellin 20 oxidase 2 GN=MIO24.5 OS=Arabidopsis thaliana (Mouse-ear cress) PE=2 SV=1	gibberellin 20-oxidase, putative [Ricinus communis]
	VF10059	0.593775	1.26742	0.662078	1.2165	0.877873	10.7785	Probable carboxylesterase 9 GN=CXE9 OS=Arabidopsis thaliana (Mouse-ear cress) PE=2 SV=1	JHL05D22.14 [Jatropha curcas]
	VF10058	0.198292	0.214981	0.157642	0.0882055	0.0684068	3.78339	Probable carboxylesterase 9 GN=CXE9 OS=Arabidopsis thaliana (Mouse-ear cress) PE=2 SV=1	JHL05D22.15 [Jatropha curcas]
	VF10055	2.93983	1.34086	1.50521	2.0477	1.41544	10.0644	Probable carboxylesterase 8 GN=CXE8 OS=Arabidopsis thaliana (Mouse-ear cress) PE=2 SV=1	JHL05D22.16 [Jatropha curcas]
	VF10022	4.81875	9.12948	16.5674	3.02814	35.7029	120.867	Methylsterol monooxygenase 1-2 GN=SMO1-2 OS=Arabidopsis thaliana (Mouse-ear cress) PE=2 SV=1	hypothetical protein JCGZ_14524 [Jatropha curcas]
	VF09973	0.509887	0.383808	0.689721	0.362327	0.284775	1.49667	Potassium transporter 5 GN=T9E8.160 OS=Arabidopsis thaliana (Mouse-ear cress) PE=1 SV=1	PREDICTED: potassium transporter 5 [Vitis vinifera]
	VF09972	0.207708	0.113019	0.304927	0.168077	0.160365	2.11584	U-box domain-containing protein 43 GN=PUB43 OS=Arabidopsis thaliana (Mouse-ear cress) PE=2 SV=1	hypothetical protein JCGZ_23076 [Jatropha curcas]
	VF09971	0	0	0	0.165353	0.461296	1.10736	Ethylene-responsive transcription factor ERF087 GN=ERF087 OS=Arabidopsis thaliana (Mouse-ear cress) PE=2 SV=1	DNA binding protein, putative [Ricinus communis]
	VF09970	0	0	0	0	0	2.23748	Nudix hydrolase 13, mitochondrial (Precursor) GN=MLJ15.8 OS=Arabidopsis thaliana (Mouse-ear cress) PE=1 SV=1	hypothetical protein JCGZ_23078 [Jatropha curcas]
	VF09963	115.082	110.895	134.543	122.867	163.503	421.482	Sterol 14-demethylase GN=F25C20.17 OS=Arabidopsis thaliana (Mouse-ear cress) PE=1 SV=1	CYP51 [Hevea brasiliensis]
	VF09903	39.0502	56.611	72.8023	45.9791	88.157	356.819	--	hypothetical protein POPTR_0019s07870g [Populus trichocarpa]
	VF09890	12.6574	14.2068	14.6601	17.2929	22.0411	66.9848	Germin-like protein 5-1 (Precursor) OS=Oryza sativa subsp. japonica (Rice) PE=2 SV=1	Rhicadhesin receptor precursor, putative [Ricinus communis]
	VF09862	0.686215	0.602788	0.495116	1.05009	0.71631	2.19495	Polygalacturonase At1g48100 (Precursor) GN=At1g48100 OS=Arabidopsis thaliana (Mouse-ear cress) PE=2 SV=1	Polygalacturonase precursor, putative [Ricinus communis]
	VF09854	7.47094	11.5298	14.2562	9.25015	21.28	136.378	WAT1-related protein At1g09380 GN=At1g09380 OS=Arabidopsis thaliana (Mouse-ear cress) PE=2 SV=1	hypothetical protein JCGZ_23192 [Jatropha curcas]
	VF09792	10.4872	7.10073	5.87757	10.4485	11.0661	25.4059	Phosphoinositide phospholipase C 2 GN=PLC2 OS=Arabidopsis thaliana (Mouse-ear cress) PE=1 SV=1	hypothetical protein JCGZ_05585 [Jatropha curcas]
	VF09748	26.4955	36.4252	38.5137	30.2228	31.2298	186.123	Actin-12 GN=ACT12 OS=Arabidopsis thaliana (Mouse-ear cress) PE=1 SV=1	PREDICTED: actin-97-like [Cucumis sativus]
	VF09747	11.2077	23.0235	23.2147	9.60925	16.1313	148.557	Actin OS=Nicotiana tabacum (Common tobacco) PE=3 SV=1	PREDICTED: actin-97-like [Cucumis sativus]
	VF09745	40.9822	43.4209	50.0065	51.5158	52.7749	412.746	--	protein with unknown function [Ricinus communis]
	VF09613	1.63749	0.256442	0.374205	2.08193	3.69658	10.0179	NAC domain-containing protein 21/22 OS=Arabidopsis thaliana (Mouse-ear cress) PE=1 SV=2	NAC domain-containing protein 21/22, putative [Ricinus communis]
	VF09606	0.0636477	0.0864513	0.956583	0.130906	55.9104	162.453	Inositol transporter 4 GN=INT4 OS=Arabidopsis thaliana (Mouse-ear cress) PE=1 SV=1	hypothetical protein JCGZ_09511 [Jatropha curcas]
	VF09535	17.985	36.9504	19.1848	16.5366	27.4408	142.833	--	hypothetical protein JCGZ_20958 [Jatropha curcas]
	VF09491	21.398	117.567	53.675	30.4017	112.654	547.763	Aquaporin TIP1-3, N-terminally processed GN=TIP1-3 OS=Arabidopsis thaliana (Mouse-ear cress) PE=1 SV=1	hypothetical protein JCGZ_18448 [Jatropha curcas]
	VF09481	114.043	82.0303	165.514	106.433	143.242	822.581	--	PREDICTED: putative lipid-transfer protein DIR1 [Populus euphratica]
	VF09407	24.9729	18.015	16.4609	17.0857	13.9437	548.019	Desiccation-related protein PCC13-62 (Precursor) OS=Craterostigma plantagineum (Blue gem) PE=2 SV=1	conserved hypothetical protein [Ricinus communis]
	VF09400	13.7217	13.2552	17.3875	14.082	10.3758	127.148	Nuclear poly(A) polymerase 3 {ECO:0000303|PubMed:18479511} OS=Arabidopsis thaliana (Mouse-ear cress) PE=1 SV=1	poly(A) polymerase, putative [Ricinus communis]
	VF09398	0.599809	0.613077	10.0344	0.32657	350.225	1321.69	Cell wall / vacuolar inhibitor of fructosidase 1 (Precursor) GN=T2J15.13 OS=Arabidopsis thaliana (Mouse-ear cress) PE=1 SV=1	hypothetical protein JCGZ_19030 [Jatropha curcas]
	VF09394	70.8347	72.4221	93.9207	68.5712	109.184	234.117	Galactokinase GN=F5E6.9 OS=Arabidopsis thaliana (Mouse-ear cress) PE=1 SV=2	hypothetical protein JCGZ_19026 [Jatropha curcas]
	VF09333	0.676023	0.151938	0.636937	0.339718	0.180497	4.06196	Nicotianamine synthase GN=CHLN OS=Solanum lycopersicum (Tomato) PE=2 SV=1	hypothetical protein JCGZ_18981 [Jatropha curcas]
	VF09320	2.43054	6.48013	5.58877	4.4689	4.68046	64.1136	Chitinase-like protein 2 (Precursor) GN=CTL2 OS=Arabidopsis thaliana (Mouse-ear cress) PE=2 SV=1	hypothetical protein JCGZ_18970 [Jatropha curcas]
	VF09287	5.29095	9.60359	28.9993	9.28681	17.0543	514.609	Major allergen Pru ar 1 OS=Prunus armeniaca (Apricot) PE=1 SV=1	hypothetical protein JCGZ_18938 [Jatropha curcas]
	VF09279	1.08188	1.3777	1.0209	1.77344	0.808549	11.0905	Chaperone protein dnaJ 49 OS=Arabidopsis thaliana (Mouse-ear cress) PE=2 SV=2	hypothetical protein JCGZ_18932 [Jatropha curcas]
	VF09233	0.461366	0.359198	0.330314	0.182021	0.242463	1.36479	--	hypothetical protein RCOM_0681280 [Ricinus communis]
	VF09195	3.56151	1.8617	2.78682	3.97066	1.73535	8.97083	Protein ULTRAPETALA 1 GN=ULT1 OS=Arabidopsis thaliana (Mouse-ear cress) PE=1 SV=1	Protein ULTRAPETALA2, putative [Ricinus communis]
	VF09084	0	0	0.13624	0.120596	0.134512	3.8453	--	conserved hypothetical protein [Ricinus communis]
	VF09043	3.08122	11.3935	16.088	4.0491	8.69294	46.03	Crocetin glucosyltransferase, chloroplastic (Precursor) GN=UGT75L6 OS=Gardenia jasminoides (Cape jasmine) PE=1 SV=1	hypothetical protein JCGZ_13140 [Jatropha curcas]
	VF09028	0.137028	0.0431778	0.0378605	0.291828	0.0273473	38.9264	--	ankyrin repeat protein [Medicago truncatula]
	VF09026	0.388134	0	0.090866	0.0963091	0	4.07852	--	hypothetical protein JCGZ_00252 [Jatropha curcas]
	VF09006	0.586889	1.23913	1.11348	3.32116	1.03456	9.46494	Glucuronoxylan 4-O-methyltransferase 1 GN=GXM1 OS=Arabidopsis thaliana (Mouse-ear cress) PE=1 SV=1	hypothetical protein POPTR_0022s00320g [Populus trichocarpa]
	VF09001	0.150756	1.27711e-07	0.0231177	3.65041e-07	0	1.63359	Mitogen-activated protein kinase kinase kinase NPK1 GN=NPK1 OS=Nicotiana tabacum (Common tobacco) PE=1 SV=1	ATP binding protein, putative [Ricinus communis]
	VF08997	0.388624	0.229505	0.432478	0.319644	0.309457	1.0379	Probable LRR receptor-like serine/threonine-protein kinase At3g47570 (Precursor) GN=At3g47570 OS=Arabidopsis thaliana (Mouse-ear cress) PE=2 SV=1	PREDICTED: probable LRR receptor-like serine/threonine-protein kinase At3g47570 isoform X2 [Populus euphratica]
	VF08919	0.0205881	0	0	0	0	2.57323	Clathrin coat assembly protein AP180 GN=AP180 OS=Arabidopsis thaliana (Mouse-ear cress) PE=1 SV=1	hypothetical protein JCGZ_13750 [Jatropha curcas]
	VF08873	39.5388	83.5461	79.3174	53.7049	104.417	256.184	UDP-glucuronic acid decarboxylase 6 GN=UXS6 OS=Arabidopsis thaliana (Mouse-ear cress) PE=2 SV=1	dtdp-glucose 4-6-dehydratase, putative [Ricinus communis]
	VF08839	0.269056	0.621814	1.32646	0.203158	0.254201	7.13076	--	hypothetical protein JCGZ_22443 [Jatropha curcas]
	VF08770	13.3981	19.081	18.6874	12.8428	15.2464	39.5078	--	hypothetical protein JCGZ_19463 [Jatropha curcas]
	VF08742	0.542645	0.670757	0.701508	0.209931	0.429767	15.2295	UDP-glucuronate:xylan alpha-glucuronosyltransferase 1 GN=MVE11.2 OS=Arabidopsis thaliana (Mouse-ear cress) PE=2 SV=1	hypothetical protein JCGZ_25413 [Jatropha curcas]
	VF08715	3.96477	7.52941	6.78051	3.38329	9.22028	22.8386	--	hypothetical protein JCGZ_10262 [Jatropha curcas]
	VF08666	0.572604	0.218244	0.0860371	0.672064	0.380303	1.4436	Heat shock protein 83 GN=HSP83A OS=Ipomoea nil (Japanese morning glory) PE=2 SV=1	TPA: putative heat shock protein 90 family protein, partial [Zea mays]
	VF08612	2.47123	1.3198	0.617641	1.80198	2.53581	21.9449	CBL-interacting serine/threonine-protein kinase 25 GN=T11H3.120 OS=Arabidopsis thaliana (Mouse-ear cress) PE=2 SV=1	hypothetical protein JCGZ_26993 [Jatropha curcas]
	VF08469	0.238281	0.277433	0.278924	0.823292	0.0885761	2.50138	Caffeic acid 3-O-methyltransferase OS=Coffea canephora (Robusta coffee) PE=2 SV=1	o-methyltransferase, putative [Ricinus communis]
	VF08462	14.6222	19.4374	19.6928	17.2002	24.0145	52.4052	UDP-sugar pyrophosphorylase GN=USP OS=Cucumis melo (Muskmelon) PE=1 SV=1	hypothetical protein JCGZ_12162 [Jatropha curcas]
	VF08436	8.02333	4.90544	4.94043	3.48721	40.7527	163.372	--	hypothetical protein JCGZ_12135 [Jatropha curcas]
	VF08423	0.145734	0	0	0.306656	0.2833	2.7511	Transcription factor BOA GN=F2O15.230 OS=Arabidopsis thaliana (Mouse-ear cress) PE=2 SV=1	hypothetical protein JCGZ_25628 [Jatropha curcas]
	VF08370	4.69027	5.26939	5.66766	9.35279	10.404	160.604	Isoflavone reductase-like protein OS=Olea europaea (Common olive) PE=1 SV=1	hypothetical protein JCGZ_04449 [Jatropha curcas]
	VF08354	1.66326	2.49001	2.35095	1.48185	6.0768	23.3743	Jasmonate O-methyltransferase GN=JMT OS=Brassica rapa subsp. pekinensis (Chinese cabbage) PE=1 SV=1	cytochrome P450, putative [Ricinus communis]
	VF08342	1.79409	3.22745	6.09028	2.48947	3.47077	26.943	21 kDa protein (Precursor) OS=Daucus carota (Wild carrot) PE=2 SV=1	hypothetical protein JCGZ_20774 [Jatropha curcas]
	VF08337	1.92649	1.93276	4.32522	1.83213	2.47159	14.2398	Vacuolar-processing enzyme (Precursor) OS=Ricinus communis (Castor bean) PE=1 SV=1	hypothetical protein JCGZ_20778 [Jatropha curcas]
	VF08336	0.312415	0.567289	0	0.483859	0.524052	2.72371	Indole-3-acetic acid-induced protein ARG7 GN=ARG7 OS=Vigna radiata var. radiata (Mung bean) PE=2 SV=1	hypothetical protein JCGZ_20779 [Jatropha curcas]
	VF08326	7.18682	9.04737	8.9139	6.90803	6.1025	20.7212	Xyloglucan galactosyltransferase KATAMARI1 GN=F11A3.8 OS=Arabidopsis thaliana (Mouse-ear cress) PE=1 SV=1	catalytic, putative [Ricinus communis]
	VF08320	0.408518	0.335187	0.711148	0.270572	0.736592	2.63256	Probable WRKY transcription factor 21 GN=WRKY21 OS=Arabidopsis thaliana (Mouse-ear cress) PE=2 SV=1	WRKY transcription factor 44 [Jatropha curcas]
	VF08292	0.380613	0.111614	0.397173	0	0	1035.24	Putative invertase inhibitor (Precursor) OS=Platanus acerifolia (London plane tree) PE=1 SV=1	hypothetical protein JCGZ_23288 [Jatropha curcas]
	VF08201	0.358825	0.212959	0.254184	0.331055	0.199958	16.1503	Putative nucleobase-ascorbate transporter 10 GN=NAT10 OS=Arabidopsis thaliana (Mouse-ear cress) PE=3 SV=2	hypothetical protein JCGZ_16013 [Jatropha curcas]
	VF08187	3.20779	1.78256	4.05025	8.51788	13.7957	31.6824	MATE efflux family protein 9 GN=F3L12.7 OS=Arabidopsis thaliana (Mouse-ear cress) PE=2 SV=1	hypothetical protein JCGZ_17156 [Jatropha curcas]
	VF08035	3.42878	3.75044	2.87734	5.39419	5.32146	75.745	Protein TRANSPARENT TESTA 12 GN=F17J16_80 OS=Arabidopsis thaliana (Mouse-ear cress) PE=2 SV=1	hypothetical protein JCGZ_21227 [Jatropha curcas]
	VF08013	12.6179	15.4337	17.0082	13.2861	12.7688	35.0038	Probable polyamine transporter At3g19553 GN=At3g19553 OS=Arabidopsis thaliana (Mouse-ear cress) PE=3 SV=1	hypothetical protein JCGZ_16308 [Jatropha curcas]
	VF08007	0	0	0	0	0	1.90035	Putative indole-3-acetic acid-amido synthetase GH3.9 GN=GH3.9 OS=Arabidopsis thaliana (Mouse-ear cress) PE=2 SV=1	Indole-3-acetic acid-amido synthetase GH3.17, putative [Ricinus communis]
	VF07977	6.20393	3.42477	4.22803	5.60926	6.51521	13.8241	B-box zinc finger protein 19 {ECO:0000303|PubMed:19920209} OS=Arabidopsis thaliana (Mouse-ear cress) PE=2 SV=1	hypothetical protein JCGZ_00941 [Jatropha curcas]
	VF07973	0.406384	0	0	0.084795	0	5.5862	--	hypothetical protein JCGZ_00936 [Jatropha curcas]
	VF07963	109.652	112.691	71.3849	152.161	126.555	366.908	Non-specific lipid-transfer protein 2 {ECO:0000303|PubMed:23913675} OS=Apium graveolens var. rapaceum (Celeriac) PE=1 SV=1	hypothetical protein JCGZ_13008 [Jatropha curcas]
	VF07929	0	0	1.16593	0	0.90885	4.39675	Uncharacterized protein At4g06744 (Precursor) GN=At4g06744 OS=Arabidopsis thaliana (Mouse-ear cress) PE=2 SV=1	hypothetical protein JCGZ_22116 [Jatropha curcas]
	VF07860	2.18812	0	0.298824	2.95425	1.93765	11.686	--	conserved hypothetical protein [Ricinus communis]
	VF07823	0	0	0	0.118025	0	12.9872	Annexin D2 GN=MXK3.27 OS=Arabidopsis thaliana (Mouse-ear cress) PE=1 SV=1	hypothetical protein JCGZ_20188 [Jatropha curcas]
	VF07745	0	0	0	0	0	1.32321	Pectinesterase PPME1 (Precursor) GN=T17F3.3 OS=Arabidopsis thaliana (Mouse-ear cress) PE=1 SV=1	Pectinesterase-1 precursor, putative [Ricinus communis]
	VF07734	0.472027	1.72741	1.55007	0.780786	0.806841	10.0401	Protein trichome birefringence-like 38 GN=TBL38 OS=Arabidopsis thaliana (Mouse-ear cress) PE=2 SV=1	hypothetical protein POPTR_0011s10730g [Populus trichocarpa]
	VF07696	0	0	0	0	0	1.8597	--	conserved hypothetical protein [Ricinus communis]
	VF07614	62.1913	103.484	102.701	52.7555	72.2381	322.385	Cysteine proteinase inhibitor 5 (Precursor) GN=CYS5 OS=Arabidopsis thaliana (Mouse-ear cress) PE=2 SV=2	hypothetical protein JCGZ_03032 [Jatropha curcas]
	VF07613	0.0238056	0	0	0.0342149	0.147476	222.751	Putative defensin-like protein 119 (Precursor) GN=LCR53 OS=Arabidopsis thaliana (Mouse-ear cress) PE=3 SV=1	hypothetical protein POPTR_0016s06160g [Populus trichocarpa]
	VF07571	8.7049	14.1533	14.0394	12.388	14.0678	42.945	--	hypothetical protein JCGZ_13447 [Jatropha curcas]
	VF07543	5.07186	0.582925	0.52088	8.21607	1.13359	66.2005	Protein NRT1/ PTR FAMILY 7.3 GN=F5D14.23 OS=Arabidopsis thaliana (Mouse-ear cress) PE=1 SV=2	hypothetical protein JCGZ_05071 [Jatropha curcas]
	VF07535	43.4303	38.3708	41.0583	76.1901	51.2019	214.513	Actin OS=Gossypium hirsutum (Upland cotton) PE=3 SV=1	unknown [Populus trichocarpa]
	VF07488	0.435334	0.484038	1.15864	0.331367	0.284262	13.5342	--	hypothetical protein POPTR_0018s10870g [Populus trichocarpa]
	VF07482	0.215034	0	0	0.279304	0	342.299	Tetraspanin-15 GN=TET15 OS=Arabidopsis thaliana (Mouse-ear cress) PE=2 SV=1	hypothetical protein JCGZ_04108 [Jatropha curcas]
	VF07464	0.070171	0	0	0	0.0290409	5.28334	Trans-resveratrol di-O-methyltransferase GN=ROMT OS=Vitis vinifera (Grape) PE=1 SV=2	hypothetical protein JCGZ_25719 [Jatropha curcas]
	VF07461	12.5239	24.4551	20.4089	18.4986	34.8456	77.9973	S-adenosylmethionine synthase 3 GN=SAMS3 OS=Catharanthus roseus (Madagascar periwinkle) PE=1 SV=1	s-adenosylmethionine synthetase, putative [Ricinus communis]
	VF07454	4.00899	7.478	6.79835	4.11522	4.69562	38.9399	DNA-damage-repair/toleration protein DRT100 (Precursor) OS=Arabidopsis thaliana (Mouse-ear cress) PE=2 SV=2	serine-threonine protein kinase, plant-type, putative [Ricinus communis]
	VF07426	1.866	3.79982	2.13432	2.46712	2.88492	8.49164	--	hypothetical protein JCGZ_18342 [Jatropha curcas]
	VF07409	0	0	0	0	0	1.38311	Pectinesterase PPME1 (Precursor) GN=T17F3.3 OS=Arabidopsis thaliana (Mouse-ear cress) PE=1 SV=1	Pectinesterase-1 precursor, putative [Ricinus communis]
	VF07318	0.505795	0.644456	0.154079	0.568311	0.583628	1.33513	Fatty acid amide hydrolase GN=FAAH OS=Arabidopsis thaliana (Mouse-ear cress) PE=1 SV=1	hypothetical protein POPTR_0005s07130g [Populus trichocarpa]
	VF07307	0.132367	1.21733	1.08843	0.197342	0.440083	80.713	Aspartic proteinase nepenthesin-1 (Precursor) GN=nep1 OS=Nepenthes gracilis (Slender pitcher plant) PE=1 SV=1	Aspartic proteinase nepenthesin-1 precursor, putative [Ricinus communis]
	VF07301	0.694933	0.647221	0.418809	1.55016	3.63063	30.6247	Sugar transport protein 14 GN=STP14 OS=Arabidopsis thaliana (Mouse-ear cress) PE=2 SV=2	hypothetical protein JCGZ_02202 [Jatropha curcas]
	VF07278	3.49155	2.39957	23.2483	2.68093	1042.18	3659.68	--	hypothetical protein JCGZ_21427 [Jatropha curcas]
	VF07206	12.5118	18.6214	28.1673	13.3336	20.2822	80.3306	Rho GDP-dissociation inhibitor 1 GN=GDI1 OS=Arabidopsis thaliana (Mouse-ear cress) PE=1 SV=1	hypothetical protein JCGZ_06445 [Jatropha curcas]
	VF07174	19.4115	30.8298	28.0821	18.7914	51.9411	389.314	Aquaporin PIP2-7 GN=PIP2-7 OS=Zea mays (Maize) PE=1 SV=1	hypothetical protein JCGZ_05520 [Jatropha curcas]
	VF07163	7.92234	9.6311	3.85789	10.3191	10.9771	53.7117	2-hydroxyisoflavanone dehydratase GN=HIDM OS=Glycyrrhiza echinata (Licorice) PE=1 SV=1	hypothetical protein JCGZ_22839 [Jatropha curcas]
	VF07139	12.5655	5.34362	4.69611	12.4372	8.42346	37.6932	Dynamin-related protein 1B GN=F15G16.150 OS=Arabidopsis thaliana (Mouse-ear cress) PE=1 SV=1	hypothetical protein JCGZ_14258 [Jatropha curcas]
	VF07087	0	0.0305422	0.0300456	0	0	2.01501	Phosphatidylinositol 4-kinase gamma 1 GN=T20B5.5 OS=Arabidopsis thaliana (Mouse-ear cress) PE=2 SV=1	inositol or phosphatidylinositol kinase, putative [Ricinus communis]
	VF07080	0.0110508	0	0	0.0635473	0.150344	20.5227	Eukaryotic translation initiation factor isoform 4G-1 GN=EIF(ISO)4G1 OS=Arabidopsis thaliana (Mouse-ear cress) PE=1 SV=1	hypothetical protein JCGZ_20151 [Jatropha curcas]
	VF07042	0.0590405	1.30005	0.269924	0.092836	2.27143	20.3779	--	hypothetical protein JCGZ_05777 [Jatropha curcas]
	VF06984	0	0	0	0	0.0217186	5.12338	Homeobox-leucine zipper protein PROTODERMAL FACTOR 2 GN=PDF2 OS=Arabidopsis thaliana (Mouse-ear cress) PE=2 SV=1	hypothetical protein JCGZ_00832 [Jatropha curcas]
	VF06976	0.122612	0.44276	0.569952	0.104731	0.275503	1.28526	COBRA-like protein 10 (Precursor) GN=COBL10 OS=Arabidopsis thaliana (Mouse-ear cress) PE=2 SV=1	hypothetical protein JCGZ_00825 [Jatropha curcas]
	VF06923	0.103227	0.182452	0.0629224	0.188461	0.0867739	4.44645	Putative beta-glucosidase 41 (Precursor) GN=BGLU41 OS=Arabidopsis thaliana (Mouse-ear cress) PE=3 SV=2	hypothetical protein JCGZ_00767 [Jatropha curcas]
	VF06892	0.454001	0.221642	0.253743	0.362157	0.445033	1.11803	Putative disease resistance protein At3g14460 GN=At3g14460 OS=Arabidopsis thaliana (Mouse-ear cress) PE=3 SV=1	leucine-rich repeat containing protein, putative [Ricinus communis]
	VF06891	0	0	0	0	0	12.3839	Protein MKS1 GN=MKS1 OS=Arabidopsis thaliana (Mouse-ear cress) PE=1 SV=2	hypothetical protein JCGZ_18341 [Jatropha curcas]
	VF06864	6.28726	8.66272	6.42044	19.1339	27.4981	57.4199	Acid phosphatase 1 (Precursor) GN=APS1 OS=Solanum lycopersicum (Tomato) PE=2 SV=1	hypothetical protein JCGZ_26290 [Jatropha curcas]
	VF06847	0.380301	0.0699271	0.0406857	0.232792	2.80065	13.0946	Transcription factor DIVARICATA GN=DIVARICATA OS=Antirrhinum majus (Garden snapdragon) PE=2 SV=1	hypothetical protein JCGZ_26305 [Jatropha curcas]
	VF06845	0	0	0	0	0	21.2232	--	hypothetical protein JCGZ_26307 [Jatropha curcas]
	VF06821	0.125383	0	0	0	0	223.125	Pectinesterase PPME1 (Precursor) GN=T17F3.3 OS=Arabidopsis thaliana (Mouse-ear cress) PE=1 SV=1	hypothetical protein JCGZ_26327 [Jatropha curcas]
	VF06806	7.53612	6.7074	9.54429	7.06485	8.07173	36.2415	Glutamyl-tRNA(Gln) amidotransferase subunit A, chloroplastic/mitochondrial {ECO:0000255|HAMAP-Rule:MF_03150} (Precursor) GN=At3g25660 OS=Arabidopsis thaliana (Mouse-ear cress) PE=2 SV=1	hypothetical protein JCGZ_26342 [Jatropha curcas]
	VF06774	31.4331	30.8426	31.4827	32.9031	59.1749	150.555	--	hypothetical protein JCGZ_05048 [Jatropha curcas]
	VF06769	0	0	0	0	0	1.65928	Pectinesterase PPME1 (Precursor) GN=T17F3.3 OS=Arabidopsis thaliana (Mouse-ear cress) PE=1 SV=1	Pectinesterase-1 precursor, putative [Ricinus communis]
	VF06705	1.0526	4.72199	4.6223	1.45783	2.33203	14.4373	Anthocyanidin 3-O-glucosyltransferase 1 GN=GT1 OS=Manihot esculenta (Cassava) PE=2 SV=1	hypothetical protein JCGZ_05002 [Jatropha curcas]
	VF06698	0.315578	0.537058	0.346452	0.407686	0.596521	1.93504	Anthocyanidin 3-O-glucosyltransferase 1 GN=GT1 OS=Manihot esculenta (Cassava) PE=2 SV=1	hypothetical protein JCGZ_04992 [Jatropha curcas]
	VF06669	0	0	0.0128183	0.0224831	0.397576	10.9037	Phospholipase D delta GN=PLDDELTA OS=Arabidopsis thaliana (Mouse-ear cress) PE=1 SV=2	hypothetical protein JCGZ_04969 [Jatropha curcas]
	VF06663	0.152645	0.152301	0.470454	0.105518	4.5285	21.747	COBRA-like protein 6 (Precursor) OS=Arabidopsis thaliana (Mouse-ear cress) PE=2 SV=2	PREDICTED: COBRA-like protein 6-like [Citrus sinensis]
	VF06622	0	0	0	0	0	68.4581	--	hypothetical protein JCGZ_13469 [Jatropha curcas]
	VF06596	0.419207	0	0	0.0748475	0.843974	9.23451	--	hypothetical protein JCGZ_15078 [Jatropha curcas]
	VF06591	1.86727	2.84846	2.17494	1.98702	3.05261	7.41155	Stromal 70 kDa heat shock-related protein, chloroplastic (Precursor) GN=HSP70 OS=Pisum sativum (Garden pea) PE=2 SV=1	hypothetical protein JCGZ_14850 [Jatropha curcas]
	VF06580	0	0	0	0	0	2.62745	--	conserved hypothetical protein [Ricinus communis]
	VF06579	0.205686	0	0	0	0	85.5992	--	hypothetical protein JCGZ_08348 [Jatropha curcas]
	VF06563	0	0	0	0	0	1.85638	UPF0496 protein 3 GN=OsI_009784 OS=Oryza sativa subsp. indica (Rice) PE=3 SV=2	hypothetical protein JCGZ_15193 [Jatropha curcas]
	VF06554	2.90344	4.76351	10.3474	1.14739	5.09051	22.7854	WAT1-related protein At1g43650 GN=At1g43650 OS=Arabidopsis thaliana (Mouse-ear cress) PE=2 SV=1	hypothetical protein JCGZ_25177 [Jatropha curcas]
	VF06552	0.172422	1.65359	1.11876	2.74191	0.13949	5.63781	Trihelix transcription factor GT-2 GN=GT-2 OS=Arabidopsis thaliana (Mouse-ear cress) PE=2 SV=1	hypothetical protein JCGZ_25180 [Jatropha curcas]
	VF06508	0.591425	2.47232	2.31737	0.951529	0.913785	5.57698	Chitinase 1 (Precursor) OS=Tulipa bakeri (Tulip) PE=1 SV=1	Chitinase 1 precursor, putative [Ricinus communis]
	VF06498	0.037465	0	0	0.323938	0	16.1058	Lipid phosphate phosphatase 2 GN=F9L1.2 OS=Arabidopsis thaliana (Mouse-ear cress) PE=2 SV=1	hypothetical protein JCGZ_10699 [Jatropha curcas]
	VF06494	17.7033	10.4749	13.5248	16.734	16.0758	36.7399	--	catalytic, putative [Ricinus communis]
	VF06491	0	0	0	0	0	15.3502	GDSL esterase/lipase At5g55050 (Precursor) GN=At5g55050 OS=Arabidopsis thaliana (Mouse-ear cress) PE=2 SV=1	zinc finger protein, putative [Ricinus communis]
	VF06452	0	0	0	0	0	1.79067	Zinc finger CCCH domain-containing protein 24 GN=At2g28450 OS=Arabidopsis thaliana (Mouse-ear cress) PE=1 SV=1	hypothetical protein JCGZ_05530 [Jatropha curcas]
	VF06440	1.4817	1.28257	0.830601	1.60156	1.53363	4.23336	Alpha,alpha-trehalose-phosphate synthase [UDP-forming] 1 GN=TPS1 OS=Arabidopsis thaliana (Mouse-ear cress) PE=1 SV=1	trehalose-6-phosphate synthase, putative [Ricinus communis]
	VF06437	0.599505	0.672963	1.85946	0.51979	0.509586	285.381	GDSL esterase/lipase At1g29670 (Precursor) GN=At1g29670 OS=Arabidopsis thaliana (Mouse-ear cress) PE=2 SV=1	zinc finger protein, putative [Ricinus communis]
	VF06436	0.235638	0	0.0361287	0.491043	14.7749	39.3524	GDSL esterase/lipase At1g29660 (Precursor) GN=At1g29660 OS=Arabidopsis thaliana (Mouse-ear cress) PE=2 SV=1	zinc finger protein, putative [Ricinus communis]
	VF06373	0	0	0	0	0	8.31914	Pectinesterase PPME1 (Precursor) GN=T17F3.3 OS=Arabidopsis thaliana (Mouse-ear cress) PE=1 SV=1	Pectinesterase-1 precursor, putative [Ricinus communis]
	VF06370	0	0	0	0	0	2.22892	Pectinesterase PPME1 (Precursor) GN=T17F3.3 OS=Arabidopsis thaliana (Mouse-ear cress) PE=1 SV=1	Pectinesterase-1 precursor, putative [Ricinus communis]
	VF06345	2.42014	1.27463	2.24467	1.7778	7.48376	22.8167	--	conserved hypothetical protein [Ricinus communis]
	VF06339	9.6911e-13	2.33632	1.7374	0.916786	0.11589	16.7576	--	hypothetical protein JCGZ_19770 [Jatropha curcas]
	VF06320	1.54659	2.61471	2.08656	1.96334	1.6679	5.48111	Probable methyltransferase PMT15 GN=At4g00750 OS=Arabidopsis thaliana (Mouse-ear cress) PE=2 SV=1	hypothetical protein JCGZ_14457 [Jatropha curcas]
	VF06291	25.1035	19.2558	24.0686	20.774	20.1537	89.2138	LIM domain-containing protein PLIM2c {ECO:0000305} OS=Arabidopsis thaliana (Mouse-ear cress) PE=1 SV=1	Pollen-specific protein SF3, putative [Ricinus communis]
	VF06280	0	0	0.146694	0.214588	0	112.593	Actin-depolymerizing factor 10 GN=ADF10 OS=Arabidopsis thaliana (Mouse-ear cress) PE=2 SV=1	PREDICTED: actin-depolymerizing factor 10 [Vitis vinifera]
	VF06218	0.822275	0.913336	0.0411641	0.523517	0.146211	5.5831	Ferric reduction oxidase 2 GN=F22L4.12 OS=Arabidopsis thaliana (Mouse-ear cress) PE=1 SV=2	ferric-chelate reductase, putative [Ricinus communis]
	VF06198	8.94956	7.65897	7.83273	8.43914	8.36581	22.2326	Protein REVEILLE 5 GN=RVE5 OS=Arabidopsis thaliana (Mouse-ear cress) PE=2 SV=1	hypothetical protein JCGZ_14339 [Jatropha curcas]
	VF06152	0.409021	0.962082	0.617757	0.683356	0.811543	2.54144	--	hypothetical protein JCGZ_14298 [Jatropha curcas]
	VF06138	8.15969	6.80595	5.31317	7.58725	21.712	103.971	Probable indole-3-acetic acid-amido synthetase GH3.5 GN=OSJNBa0009C07.16 OS=Oryza sativa subsp. japonica (Rice) PE=2 SV=1	auxin-responsive GH3 family protein [Hevea brasiliensis]
	VF06123	42.6762	38.1085	41.25	35.4627	159.086	320.476	--	hypothetical protein JCGZ_14269 [Jatropha curcas]
	VF06112	0.257832	0.535588	0.245909	0.700909	0.507957	1.78653	Cytochrome b561 and DOMON domain-containing protein At3g61750 (Precursor) GN=At3g61750 OS=Arabidopsis thaliana (Mouse-ear cress) PE=3 SV=1	dopamine beta-monooxygenase, putative [Ricinus communis]
	VF06092	17.946	0.221006	0.3084	28.6231	11.0206	88.2945	Alkaline/neutral invertase CINV2 {ECO:0000305} GN=At4g09510 OS=Arabidopsis thaliana (Mouse-ear cress) PE=1 SV=1	hypothetical protein JCGZ_14237 [Jatropha curcas]
	VF06035	0	0.133451	0.0430335	0	0.190742	1.17896	GDSL esterase/lipase At2g30310 (Precursor) GN=At2g30310 OS=Arabidopsis thaliana (Mouse-ear cress) PE=2 SV=1	hypothetical protein JCGZ_17250 [Jatropha curcas]
	VF05884	0.433946	0.649375	1.87202	1.91734	1.24363	5.01682	BAG family molecular chaperone regulator 2 GN=BAG2 OS=Arabidopsis thaliana (Mouse-ear cress) PE=1 SV=1	hypothetical protein JCGZ_10204 [Jatropha curcas]
	VF05882	0.132156	0	0.0466304	0.415981	0.432191	1.74069	HVA22-like protein i GN=HVA22I OS=Arabidopsis thaliana (Mouse-ear cress) PE=2 SV=2	PREDICTED: putative HVA22-like protein g isoform X2 [Populus euphratica]
	VF05851	10.4005	5.01399	2.71323	9.55808	5.28484	24.798	(+)-neomenthol dehydrogenase GN=SDR1 OS=Arabidopsis thaliana (Mouse-ear cress) PE=1 SV=1	hypothetical protein JCGZ_23848 [Jatropha curcas]
	VF05826	0.724198	0.82898	0.698525	0.94046	1.93276	5.99272	Uncharacterized membrane protein At1g06890 GN=At1g06890 OS=Arabidopsis thaliana (Mouse-ear cress) PE=1 SV=1	organic anion transporter, putative [Ricinus communis]
	VF05809	2.51892	2.88523	1.82826	2.07175	1.6929	11.3656	Protein ECERIFERUM 26 GN=CER26 OS=Arabidopsis thaliana (Mouse-ear cress) PE=2 SV=1	hypothetical protein JCGZ_01091 [Jatropha curcas]
	VF05805	3.9952	3.48644	2.83125	4.24939	3.65843	8.76332	Probable magnesium transporter NIPA1 GN=At3g23870 OS=Arabidopsis thaliana (Mouse-ear cress) PE=2 SV=1	conserved hypothetical protein [Ricinus communis]
	VF05799	12.5878	10.3815	12.8174	14.2029	14.7935	40.2273	Beta-galactosidase 9 (Precursor) GN=BGAL9 OS=Arabidopsis thaliana (Mouse-ear cress) PE=2 SV=1	hypothetical protein JCGZ_01100 [Jatropha curcas]
	VF05795	0.701762	1.73435	2.22637	0.795539	8.97123	31.617	Probable sucrose-phosphate synthase 3 GN=F13M7.9 OS=Arabidopsis thaliana (Mouse-ear cress) PE=2 SV=1	hypothetical protein JCGZ_01103 [Jatropha curcas]
	VF05771	3.78451	2.29491	0.512049	2.55097	3.1255	7.93477	High mobility group B protein 15 GN=F13M7.13 OS=Arabidopsis thaliana (Mouse-ear cress) PE=2 SV=1	hypothetical protein JCGZ_01124 [Jatropha curcas]
	VF05693	0	0.274124	0.0809265	0.265591	0.278185	1.01328	Heavy metal-associated isoprenylated plant protein 26 (Precursor) GN=F20M13.140 OS=Arabidopsis thaliana (Mouse-ear cress) PE=1 SV=1	copper transport protein atox1, putative [Ricinus communis]
	VF05681	12.9215	15.4146	10.0892	16.0362	22.1332	54.584	Beta-amylase 1, chloroplastic (Precursor) GN=F14O13.12 OS=Arabidopsis thaliana (Mouse-ear cress) PE=1 SV=1	hypothetical protein JCGZ_12909 [Jatropha curcas]
	VF05651	0.065801	0.261609	0.604608	0.100579	0.047572	2.61285	--	calcium-binding EF hand family protein [Populus trichocarpa]
	VF05649	14.7423	63.0789	66.066	17.7887	108.975	2362.63	Putative lipid-transfer protein DIR1 (Precursor) GN=DIR1 OS=Arabidopsis thaliana (Mouse-ear cress) PE=1 SV=1	PREDICTED: putative lipid-transfer protein DIR1-like [Fragaria vesca subsp. vesca]
	VF05632	9.25467	17.9973	26.0191	17.4997	20.469	70.5112	Protein transport protein Sec61 subunit gamma OS=Oryza sativa subsp. japonica (Rice) PE=3 SV=1	protein transport protein SEC61 subunit gamma [Jatropha curcas]
	VF05596	2.32327	4.37219	4.40642	3.04048	7.59663	16.8269	Oligopeptide transporter 2 GN=OPT2 OS=Arabidopsis thaliana (Mouse-ear cress) PE=2 SV=2	hypothetical protein JCGZ_15925 [Jatropha curcas]
	VF05587	0.497292	0.80937	0.559225	1.019	1.09855	7.0891	--	hypothetical protein JCGZ_15917 [Jatropha curcas]
	VF05586	2.13386	2.71884	2.58222	1.05848	1.52865	5.57264	--	hypothetical protein L484_025563 [Morus notabilis]
	VF05585	2.29889	6.03902	3.3325	3.45226	3.51709	39.8395	--	hypothetical protein POPTR_0002s11090g [Populus trichocarpa]
	VF05584	1.01333	0.432391	0.274118	0.548669	0.106793	10.5612	--	hypothetical protein JCGZ_15914 [Jatropha curcas]
	VF05576	23.9075	21.5835	24.8809	24.4434	25.9212	58.8134	--	hypothetical protein JCGZ_15906 [Jatropha curcas]
	VF05570	27.7198	24.2217	30.9205	18.2588	40.0282	90.7811	70 kDa peptidyl-prolyl isomerase GN=FKBP70 OS=Triticum aestivum (Wheat) PE=1 SV=1	hypothetical protein JCGZ_15900 [Jatropha curcas]
	VF05529	0.758809	0.265619	0.57659	0.460251	0.554866	4.41927	Protein MIZU-KUSSEI 1 GN=MIZ1 OS=Arabidopsis thaliana (Mouse-ear cress) PE=1 SV=1	hypothetical protein JCGZ_09396 [Jatropha curcas]
	VF05527	3.17102	5.50077	4.74961	4.72499	9.38454	22.088	Stress enhanced protein 2, chloroplastic (Precursor) GN=SEP2 OS=Arabidopsis thaliana (Mouse-ear cress) PE=2 SV=1	hypothetical protein JCGZ_09398 [Jatropha curcas]
	VF05482	0	0	0	0	0.456658	35.9727	Protein EXORDIUM (Precursor) GN=EXO OS=Arabidopsis thaliana (Mouse-ear cress) PE=2 SV=1	phosphate-responsive 1 family protein [Populus trichocarpa]
	VF05481	0.0421123	0	0	0	0	3.42261	Protein EXORDIUM-like 6 (Precursor) GN=EXL6 OS=Arabidopsis thaliana (Mouse-ear cress) PE=3 SV=1	phosphate-responsive 1 family protein [Populus trichocarpa]
	VF05476	1.00999	0.970349	1.38699	1.12873	0.868526	2.88098	NAC domain-containing protein 89 OS=Arabidopsis thaliana (Mouse-ear cress) PE=1 SV=1	NAC transcription factor 075 [Jatropha curcas]
	VF05440	0	0	0	0	0.621312	3.92297	GDSL esterase/lipase 6 (Precursor) GN=GLIP6 OS=Arabidopsis thaliana (Mouse-ear cress) PE=2 SV=1	hypothetical protein JCGZ_09272 [Jatropha curcas]
	VF05391	4.1173	5.17047	5.87443	4.28082	6.78898	15.1251	--	protein binding protein, putative [Ricinus communis]
	VF05388	6.52484	7.69802	6.04849	8.83977	7.33509	27.1484	--	ubiquitin-protein ligase, putative [Ricinus communis]
	VF05387	1.17086	0.418685	0.415526	1.03879	0.281628	344.892	GDSL esterase/lipase At3g48460 (Precursor) GN=At3g48460 OS=Arabidopsis thaliana (Mouse-ear cress) PE=2 SV=1	Alpha-L-fucosidase 2 precursor, putative [Ricinus communis]
	VF05379	0.288737	0.110845	0	0.81236	1.21241	4.73963	--	PREDICTED: uncharacterized protein LOC105138059 [Populus euphratica]
	VF05366	2.5052	0.773356	1.2289	1.60838	1.05321	12.2568	--	2-oxoglutarate dehydrogenase E1 component family protein [Populus trichocarpa]
	VF05360	0	0	0	0	0	1.48172	Transcription factor bHLH110 GN=T22C5.11 OS=Arabidopsis thaliana (Mouse-ear cress) PE=2 SV=2	PREDICTED: transcription factor bHLH110-like isoform X3 [Populus euphratica]
	VF05354	23.7292	17.2163	6.67754	22.2649	23.146	49.3298	Probable aminotransferase TAT2 GN=At5g53970 OS=Arabidopsis thaliana (Mouse-ear cress) PE=2 SV=1	hypothetical protein JCGZ_15304 [Jatropha curcas]
	VF05333	0.18144	0.0949135	0.0484716	0.570835	0.261935	3.292	Cysteine-rich repeat secretory protein 38 (Precursor) GN=CRRSP38 OS=Arabidopsis thaliana (Mouse-ear cress) PE=2 SV=1	hypothetical protein JCGZ_22904 [Jatropha curcas]
	VF05329	2.57163	1.17148	0.259227	0.560829	0.866462	16.9641	NAC domain-containing protein 100 GN=NAC100 OS=Arabidopsis thaliana (Mouse-ear cress) PE=2 SV=1	NAC transcription factor 002 [Jatropha curcas]
	VF05297	11.476	17.5031	18.0816	20.4273	20.6628	47.8669	Probable methyltransferase PMT2 GN=At1g26850 OS=Arabidopsis thaliana (Mouse-ear cress) PE=2 SV=2	hypothetical protein JCGZ_11617 [Jatropha curcas]
	VF05277	0.288269	0.0764496	0.994398	0.101485	106.549	500.388	--	aldose-1-epimerase, putative [Ricinus communis]
	VF05276	1.3673	2.16445	2.43493	1.3372	1.74437	5.40671	ABC transporter A family member 7 GN=T23J7.110 OS=Arabidopsis thaliana (Mouse-ear cress) PE=3 SV=2	ABC transporter family protein [Hevea brasiliensis]
	VF05275	0.347345	0.126026	0.173397	0.332787	0.679596	4.37587	ABC transporter A family member 7 GN=T23J7.110 OS=Arabidopsis thaliana (Mouse-ear cress) PE=3 SV=2	hypothetical protein JCGZ_11601 [Jatropha curcas]
	VF05237	6.28628	4.81958	3.04473	3.48274	4.19874	19.5855	LOB domain-containing protein 27 GN=T23J7.200 OS=Arabidopsis thaliana (Mouse-ear cress) PE=2 SV=1	hypothetical protein JCGZ_11566 [Jatropha curcas]
	VF05218	3.05807	1.70222	1.90299	2.57567	2.01831	7.62756	--	hypothetical protein RCOM_1512920 [Ricinus communis]
	VF05161	0.11152	0.0691666	0.0204257	0.178417	0.0413183	1.37564	Spermidine synthase 2 OS=Datura stramonium (Jimsonweed) PE=2 SV=1	hypothetical protein JCGZ_11498 [Jatropha curcas]
	VF05136	75.1336	88.404	83.115	68.8922	90.8421	185.862	1-deoxy-D-xylulose 5-phosphate reductoisomerase, chloroplastic (Precursor) GN=MQB2.11 OS=Arabidopsis thaliana (Mouse-ear cress) PE=2 SV=2	1-deoxy-D-xylulose-5-phosphate reductoisomerase [Hevea brasiliensis]
	VF05079	1.2797	1.214	0.196046	1.91356	0.62804	10.5224	Oleosin 5 GN=At3g01570 OS=Arabidopsis thaliana (Mouse-ear cress) PE=2 SV=1	hypothetical protein JCGZ_11426 [Jatropha curcas]
	VF05056	16.3508	15.4065	14.466	18.3921	20.6043	66.1225	Plant intracellular Ras-group-related LRR protein 9 GN=PIRL9 OS=Arabidopsis thaliana (Mouse-ear cress) PE=2 SV=1	hypothetical protein JCGZ_11407 [Jatropha curcas]
	VF05038	0.147144	0.696117	1.2356	0.935657	7.91554	47.1915	Tetraspanin-11 GN=TET11 OS=Arabidopsis thaliana (Mouse-ear cress) PE=2 SV=1	hypothetical protein JCGZ_05826 [Jatropha curcas]
	VF05015	7.7201	8.83446	14.9385	7.59362	8.11827	107.88	Oleosin 1 GN=OLE1 OS=Prunus dulcis (Almond) PE=2 SV=1	hypothetical protein JCGZ_05847 [Jatropha curcas]
	VF05013	0.348703	1.26998	1.33321	1.24114	2.02979	4.34038	--	hypothetical protein JCGZ_05848 [Jatropha curcas]
	VF05006	3.15655	3.39599	2.30163	2.76253	2.53204	11.5819	Leucoanthocyanidin reductase GN=LAR OS=Desmodium uncinatum (Spanish clover) PE=1 SV=1	hypothetical protein POPTR_0015s03360g [Populus trichocarpa]
	VF04978	0.238195	0.12475	0.20195	0.248315	0.18698	1.40334	Serine/threonine-protein kinase HT1 GN=HT1 OS=Arabidopsis thaliana (Mouse-ear cress) PE=1 SV=1	protein with unknown function [Ricinus communis]
	VF04947	0.972862	0.806688	1.41101	0.60226	0.35217	5.8198	Omega-hydroxypalmitate O-feruloyl transferase GN=MEE6.11 OS=Arabidopsis thaliana (Mouse-ear cress) PE=1 SV=1	hypothetical protein JCGZ_18076 [Jatropha curcas]
	VF04902	4.57685	14.5161	8.21731	7.04709	13.5028	31.2779	Cytokinin dehydrogenase 7 GN=F13M11.? OS=Arabidopsis thaliana (Mouse-ear cress) PE=1 SV=1	hypothetical protein JCGZ_07603 [Jatropha curcas]
	VF04870	17.0953	11.8666	12.7503	15.9985	13.035	37.0261	Cadmium/zinc-transporting ATPase HMA2 GN=HMA2 OS=Arabidopsis thaliana (Mouse-ear cress) PE=2 SV=1	hypothetical protein JCGZ_04570 [Jatropha curcas]
	VF04866	0.726275	0.938671	0.340411	0.730904	1.22142	2.70209	--	hypothetical protein JCGZ_13803 [Jatropha curcas]
	VF04824	0.641004	0.867714	0.40884	1.59631	0.435743	3.67337	--	hypothetical protein POPTR_0001s38870g [Populus trichocarpa]
	VF04810	1.64061	3.39796	9.38874	0.937707	1.47401	279.735	WAT1-related protein At2g37460 GN=At2g37460 OS=Arabidopsis thaliana (Mouse-ear cress) PE=2 SV=1	hypothetical protein JCGZ_09027 [Jatropha curcas]
	VF04780	9.02434	8.33314	10.4807	10.6639	7.18338	23.3905	Caffeoylshikimate esterase GN=CSE OS=Arabidopsis thaliana (Mouse-ear cress) PE=1 SV=1	hypothetical protein JCGZ_00336 [Jatropha curcas]
	VF04748	1.18459	1.21425	0.70307	1.53486	1.4867	6.81442	--	conserved hypothetical protein [Ricinus communis]
	VF04729	0.72731	1.77233	2.13765	1.13731	3.3701	91.5982	Glucomannan 4-beta-mannosyltransferase 9 GN=F17C15.180 OS=Arabidopsis thaliana (Mouse-ear cress) PE=2 SV=1	hypothetical protein JCGZ_01530 [Jatropha curcas]
	VF04710	0	0.720062	1.79966	0.0647007	1.03358	104.201	D-galacturonate reductase GN=GALUR OS=Fragaria ananassa (Strawberry) PE=1 SV=1	NAD(P)-linked oxidoreductase superfamily protein, putative [Theobroma cacao]
	VF04708	1.23325	1.59622	0.425302	0.42429	0.133236	33.1226	Non-functional NADPH-dependent codeinone reductase 2 GN=COR2 OS=Papaver somniferum (Opium poppy) PE=1 SV=1	hypothetical protein JCGZ_04830 [Jatropha curcas]
	VF04701	0.071332	0.0495145	0.0449729	0.149581	0.415744	30.8979	Putative clathrin assembly protein At1g25240 GN=At1g25240 OS=Arabidopsis thaliana (Mouse-ear cress) PE=3 SV=1	hypothetical protein JCGZ_04825 [Jatropha curcas]
	VF04697	0.255916	0.0406159	0.0759544	0.41708	13.3176	118.975	Guanosine nucleotide diphosphate dissociation inhibitor At5g09550 GN=At5g09550 OS=Arabidopsis thaliana (Mouse-ear cress) PE=3 SV=1	protein with unknown function [Ricinus communis]
	VF04598	0.239456	0.176098	0.0223825	0.0868472	0.28405	2.69013	Zinc finger protein ZAT5 GN=ZAT5 OS=Arabidopsis thaliana (Mouse-ear cress) PE=2 SV=1	hypothetical protein JCGZ_16179 [Jatropha curcas]
	VF04597	0.589314	0.512346	0.196224	0.387682	1.5333	7.75161	--	--
	VF04591	10.1159	1.58797	1.26283	10.2745	3.40473	23.476	Protein trichome birefringence-like 33 GN=TBL33 OS=Arabidopsis thaliana (Mouse-ear cress) PE=2 SV=1	hypothetical protein JCGZ_01200 [Jatropha curcas]
	VF04567	1.95757	1.24897	0.10677	0.656781	1.66352	149.117	Heat stress transcription factor B-3 GN=T32G6.21 OS=Arabidopsis thaliana (Mouse-ear cress) PE=2 SV=1	PREDICTED: heat stress transcription factor B-3-like [Populus euphratica]
	VF04465	42.6534	65.1496	66.1735	42.0345	57.3039	161.168	Glucan endo-1,3-beta-glucosidase 7 (Precursor) GN=At4g34480 OS=Arabidopsis thaliana (Mouse-ear cress) PE=1 SV=2	Glucan endo-1,3-beta-glucosidase precursor, putative [Ricinus communis]
	VF04452	8.60577	17.88	11.5919	7.7329	13.4298	118.312	3-ketoacyl-CoA synthase 12 (Precursor) GN=KCS12 OS=Arabidopsis thaliana (Mouse-ear cress) PE=2 SV=1	hypothetical protein JCGZ_05640 [Jatropha curcas]
	VF04451	0.476444	4.22468	0.321391	1.17553	2.72116	29.9371	Exocyst complex component EXO70A1 GN=EXO70A1 OS=Arabidopsis thaliana (Mouse-ear cress) PE=1 SV=1	protein binding protein, putative [Ricinus communis]
	VF04422	0.33948	1.47548	0.833104	0.619571	0.647003	6.46471	HVA22-like protein j GN=HVA22J OS=Arabidopsis thaliana (Mouse-ear cress) PE=2 SV=2	PREDICTED: putative HVA22-like protein g [Populus euphratica]
	VF04391	0.958027	0.707612	1.23964	0.599228	0.526734	5.1598	--	hypothetical protein JCGZ_08824 [Jatropha curcas]
	VF04366	0.601557	0.503535	0.384419	0.582786	0.481786	1.85088	--	hypothetical protein JCGZ_06787 [Jatropha curcas]
	VF04357	0.190774	0.0693871	1.43527	2.07855	19.3719	56.6543	Beta-fructofuranosidase, insoluble isoenzyme 1 (Precursor) GN=INV1 OS=Daucus carota (Wild carrot) PE=1 SV=1	Beta-fructofuranosidase, insoluble isoenzyme 3 precursor, putative [Ricinus communis]
	VF04343	0.0543816	0.0250856	0.0709015	0.0110771	0.365064	13.465	Subtilisin-like protease SBT5.3 (Precursor) OS=Arabidopsis thaliana (Mouse-ear cress) PE=2 SV=1	Xylem serine proteinase 1 precursor, putative [Ricinus communis]
	VF04339	0.528037	5.26238	1.33655	1.18517	7.1592	32.8725	Alpha carbonic anhydrase 1, chloroplastic (Precursor) GN=F3C22.120 OS=Arabidopsis thaliana (Mouse-ear cress) PE=1 SV=2	hypothetical protein JCGZ_06755 [Jatropha curcas]
	VF04337	0.935892	1.2256	1.04338	0.707596	2.07475	9.40147	--	conserved hypothetical protein [Ricinus communis]
	VF04314	16.0841	13.8628	16.1876	21.4143	22.4223	63.0885	Glucan endo-1,3-beta-glucosidase 4 (Precursor) GN=At3g13560 OS=Arabidopsis thaliana (Mouse-ear cress) PE=1 SV=1	hydrolase, hydrolyzing O-glycosyl compounds, putative [Ricinus communis]
	VF04241	3.4089	11.5049	9.29874	3.40923	4.67583	23.6511	UDP-glycosyltransferase 86A1 GN=UGT86A1 OS=Arabidopsis thaliana (Mouse-ear cress) PE=2 SV=1	hypothetical protein CISIN_1g011724mg [Citrus sinensis]
	VF04216	14.5783	15.0676	50.9394	18.9456	48.3976	219.626	Phenylalanine ammonia-lyase GN=PAL6 OS=Citrus limon (Lemon) PE=2 SV=1	Phenylalanine ammonia-lyase, putative [Ricinus communis]
	VF04214	0.283708	1.9036	0.0746305	0	0	30.3743	Organ-specific protein P4 OS=Pisum sativum (Garden pea) PE=2 SV=1	PREDICTED: organ-specific protein P4-like isoform X1 [Populus euphratica]
	VF04213	1.1528	1.48694	0.381794	0.573754	0.284663	8.52855	BURP domain-containing protein 5 (Precursor) OS=Oryza sativa subsp. japonica (Rice) PE=2 SV=2	hypothetical protein JCGZ_20067 [Jatropha curcas]
	VF04212	0.0715155	0.725059	0.103195	0	0.051496	1.66833	Organ-specific protein S2 OS=Pisum sativum (Garden pea) PE=2 SV=1	hypothetical protein JCGZ_20066 [Jatropha curcas]
	VF04197	2.76519	3.79942	7.53927	3.7933	6.9542	18.3414	Probable inorganic phosphate transporter 1-7 GN=PHT1-7 OS=Arabidopsis thaliana (Mouse-ear cress) PE=2 SV=2	hypothetical protein JCGZ_02325 [Jatropha curcas]
	VF04174	6.27458	3.02819	2.06696	4.78432	38.7573	97.6062	Putative protein phosphatase 2C-like protein 44 GN=At3g23360 OS=Arabidopsis thaliana (Mouse-ear cress) PE=5 SV=1	protein phosphatase 2c, putative [Ricinus communis]
	VF04168	0.711566	0.737679	0.915713	0.446015	0.273933	11.0465	CRIB domain-containing protein RIC1 GN=RIC1 OS=Arabidopsis thaliana (Mouse-ear cress) PE=1 SV=1	conserved hypothetical protein [Ricinus communis]
	VF04163	0.588366	0.168694	0.297981	0.794755	2.81987	150.926	Phosphate transporter PHO1 GN=PHO1 OS=Arabidopsis thaliana (Mouse-ear cress) PE=2 SV=1	xenotropic and polytropic murine leukemia virus receptor pho1, putative [Ricinus communis]
	VF04153	0.157637	0.213921	0.125602	0.236655	0.273184	1.63091	--	hypothetical protein JCGZ_02369 [Jatropha curcas]
	VF04113	0	0	0	0	0	2.43762	Putative defensin-like protein 165 (Precursor) GN=LCR12 OS=Arabidopsis thaliana (Mouse-ear cress) PE=3 SV=1	PREDICTED: putative defensin-like protein 165 [Populus euphratica]
	VF04108	0.100455	0	0	0.404787	0.18881	2.8953	--	conserved hypothetical protein [Ricinus communis]
	VF04099	0	0	0.0238064	0	0.168308	3.88578	Metal-nicotianamine transporter YSL3 GN=YSL3 OS=Arabidopsis thaliana (Mouse-ear cress) PE=2 SV=1	hypothetical protein JCGZ_16395 [Jatropha curcas]
	VF04090	0.658086	0.207827	0.146539	0.561382	8.21652	319.056	Probable fructokinase-5 OS=Arabidopsis thaliana (Mouse-ear cress) PE=2 SV=1	PREDICTED: probable fructokinase-5 [Populus euphratica]
	VF04076	13.6706	14.2636	21.7038	9.31963	15.879	125.884	2-oxoglutarate-dependent dioxygenase DAO GN=OSJNBa0022H21.12 OS=Oryza sativa subsp. japonica (Rice) PE=2 SV=2	Gibberellin 3-beta-dioxygenase, putative [Ricinus communis]
	VF04072	10.2145	5.29703	4.32025	8.84969	6.15586	33.4259	Sugar carrier protein A GN=STA OS=Ricinus communis (Castor bean) PE=2 SV=1	hypothetical protein JCGZ_03978 [Jatropha curcas]
	VF04070	0.223344	0	3.40346	0.276973	0.256026	9.74373	Germin-like protein subfamily 1 member 17 (Precursor) GN=At5g39150 OS=Arabidopsis thaliana (Mouse-ear cress) PE=2 SV=1	Rhicadhesin receptor precursor, putative [Ricinus communis]
	VF04062	0.0598378	0.277105	0.152073	0.114314	0.296581	5.83846	Probable xyloglucan endotransglucosylase/hydrolase protein 30 (Precursor) GN=F3C3.5 OS=Arabidopsis thaliana (Mouse-ear cress) PE=2 SV=2	hypothetical protein JCGZ_15540 [Jatropha curcas]
	VF04059	0	0	0	0	0.0238719	65	2-alkenal reductase (NADP(+)-dependent) GN=DBR OS=Nicotiana tabacum (Common tobacco) PE=1 SV=1	PREDICTED: 2-alkenal reductase (NADP(+)-dependent)-like [Citrus sinensis]
	VF04044	0.0824243	0.513651	3.23464	0.0898304	0.0435133	36.5977	Probable mannitol dehydrogenase GN=CAD OS=Fragaria ananassa (Strawberry) PE=2 SV=1	hypothetical protein PRUPE_ppa007622mg [Prunus persica]
	VF04013	0.324685	0.213514	0.0470252	0.592899	0.575029	5.57622	Condensin complex subunit 2 GN=T26B15 OS=Arabidopsis thaliana (Mouse-ear cress) PE=1 SV=1	hypothetical protein JCGZ_00930 [Jatropha curcas]
	VF03995	0.0197949	0.0327855	0.0143653	0.0158999	0.0440275	1.17019	WRKY transcription factor 6 GN=WRKY6 OS=Arabidopsis thaliana (Mouse-ear cress) PE=1 SV=1	WRKY transcription factor 33 [Jatropha curcas]
	VF03979	2.69137	0.334777	0.308184	3.92494	0.447135	12.1287	Transcription factor GAMYB OS=Oryza sativa subsp. japonica (Rice) PE=2 SV=1	hypothetical protein JCGZ_00902 [Jatropha curcas]
	VF03944	0.267719	0.687213	0.213765	0.474307	0.863922	57.3983	2-alkenal reductase (NADP(+)-dependent) GN=DBR OS=Nicotiana tabacum (Common tobacco) PE=1 SV=1	hypothetical protein JCGZ_00874 [Jatropha curcas]
	VF03906	12.6972	14.4575	8.89601	13.6358	14.5212	31.1413	--	PREDICTED: nucleolar GTP-binding protein 2-like [Elaeis guineensis]
	VF03903	11.1628	9.12382	7.77699	15.0243	22.7811	291.928	MLO-like protein 11 GN=MLO11 OS=Arabidopsis thaliana (Mouse-ear cress) PE=2 SV=1	hypothetical protein JCGZ_20966 [Jatropha curcas]
	VF03901	0	0	1.05874	0	0.536385	4.12319	--	conserved hypothetical protein [Ricinus communis]
	VF03889	2.022	2.70365	2.02737	1.10641	1.66932	7.7526	Cytochrome P450 89A2 GN=F13O11.20 OS=Arabidopsis thaliana (Mouse-ear cress) PE=2 SV=2	hypothetical protein JCGZ_00574 [Jatropha curcas]
	VF03888	1.24914	0.722813	0.40866	0.623264	0.827184	8.08951	--	hypothetical protein JCGZ_23412 [Jatropha curcas]
	VF03853	0.981407	0.544414	0.317272	0.274412	0.183389	3.09548	Serine/threonine-protein phosphatase PP1 GN=PP1 OS=Medicago sativa subsp. varia (Alfalfa) PE=2 SV=1	hypothetical protein JCGZ_00609 [Jatropha curcas]
	VF03833	0.230152	0.168568	0.236539	0.139372	0.418081	3.48725	Probable LRR receptor-like serine/threonine-protein kinase At5g37450 (Precursor) GN=At5g37450 OS=Arabidopsis thaliana (Mouse-ear cress) PE=2 SV=1	PREDICTED: probable LRR receptor-like serine/threonine-protein kinase At5g37450 [Populus euphratica]
	VF03814	0	0.218777	0.0997556	0.218314	0.148896	1.25076	--	hypothetical protein POPTR_0016s14480g [Populus trichocarpa]
	VF03792	0.959217	0.568362	0.578156	1.48889	1.52155	4.02528	--	hypothetical protein JCGZ_00365 [Jatropha curcas]
	VF03788	14.5693	15.7957	15.132	12.1715	14.3891	34.3716	CBL-interacting serine/threonine-protein kinase 14 GN=At5g01820 OS=Arabidopsis thaliana (Mouse-ear cress) PE=1 SV=1	hypothetical protein JCGZ_00369 [Jatropha curcas]
	VF03753	0.0570787	0	0.0167821	0	0	179.435	Probable polygalacturonase OS=Vitis vinifera (Grape) PE=1 SV=1	hypothetical protein JCGZ_26058 [Jatropha curcas]
	VF03704	1.73507	1.06578	0.228783	1.34064	0.84932	3.76723	--	hypothetical protein JCGZ_16750 [Jatropha curcas]
	VF03663	16.5969	9.2466	10.0881	26.0538	33.3457	71.6971	--	hypothetical protein JCGZ_13546 [Jatropha curcas]
	VF03632	0.507571	0.744311	0.889715	2.13829	16.3658	569.526	Olee1-like protein (Precursor) OS=Betula pendula (European white birch) PE=2 SV=1	hypothetical protein JCGZ_14735 [Jatropha curcas]
	VF03612	2.13197	0	0	1.03132	0.747512	17.0885	--	conserved hypothetical protein [Ricinus communis]
	VF03573	0	0	0	0.0468534	0	4.18562	--	hypothetical protein JCGZ_20857 [Jatropha curcas]
	VF03559	9.33312	4.44239	3.68119	5.85786	4.99628	25.7153	Ras-related protein RIC1 OS=Oryza sativa subsp. japonica (Rice) PE=2 SV=2	hypothetical protein JCGZ_24808 [Jatropha curcas]
	VF03551	0.125555	0.105693	0	0.336641	0.0868516	62.1015	--	hypothetical protein JCGZ_24800 [Jatropha curcas]
	VF03540	0.16341	0.737191	0.548754	0.15239	0.403582	1.5494	Phospholipase D epsilon GN=PLDEPSILON OS=Arabidopsis thaliana (Mouse-ear cress) PE=3 SV=1	hypothetical protein JCGZ_24789 [Jatropha curcas]
	VF03522	0.201856	0.15655	0	0.0480411	0	7.00038	LOB domain-containing protein 22 GN=MCP4.8 OS=Arabidopsis thaliana (Mouse-ear cress) PE=2 SV=1	hypothetical protein JCGZ_24763 [Jatropha curcas]
	VF03507	5.41759e-06	0.00375312	0.139716	0.523501	0.468244	1.15341	Transcription factor MYB21 GN=MGF10.23 OS=Arabidopsis thaliana (Mouse-ear cress) PE=1 SV=1	r2r3-myb transcription factor, putative [Ricinus communis]
	VF03491	0	0	0	0	0	1.86833	Serine/threonine-protein kinase GN=PUB34 OS=Arabidopsis thaliana (Mouse-ear cress) PE=3 SV=1	kinase, putative [Ricinus communis]
	VF03466	0	0	0	0	0	2.88955	Probable LRR receptor-like serine/threonine-protein kinase At1g07650 (Precursor) GN=At1g07650 OS=Arabidopsis thaliana (Mouse-ear cress) PE=1 SV=1	serine-threonine protein kinase, plant-type, putative [Ricinus communis]
	VF03445	0.0274411	0	0	0	0.364321	19.0386	Lysine histidine transporter-like 5 GN=At1g71680 OS=Arabidopsis thaliana (Mouse-ear cress) PE=2 SV=2	PREDICTED: lysine histidine transporter-like 5 [Nelumbo nucifera]
	VF03430	0.436204	0.590531	1.12369	2.41599	5.02195	14.0658	Probable cytokinin riboside 5&apos;-monophosphate phosphoribohydrolase LOGL1 OS=Oryza sativa subsp. japonica (Rice) PE=2 SV=1	hypothetical protein JCGZ_01885 [Jatropha curcas]
	VF03327	0	0	0	0	0	25.1373	Alpha carbonic anhydrase 4 (Precursor) GN=ACA4 OS=Arabidopsis thaliana (Mouse-ear cress) PE=3 SV=1	carbonic anhydrase, putative [Ricinus communis]
	VF03318	9.53906	9.18891	7.9137	8.6247	9.77484	20.2503	Putative pectate lyase 21 (Precursor) GN=At5g55720 OS=Arabidopsis thaliana (Mouse-ear cress) PE=3 SV=1	hypothetical protein CISIN_1g020121mg [Citrus sinensis]
	VF03221	4.79109	6.26497	1.05161	5.104	1.97321	13.1102	--	hypothetical protein POPTR_0018s06230g [Populus trichocarpa]
	VF03210	1.03389	1.23602	1.91619	0.846788	0.714563	14.4155	--	calcium ion binding protein, putative [Ricinus communis]
	VF03180	0.22164	0.200625	0.141333	0.144907	0.700576	70.6031	Cystathionine beta-lyase, chloroplastic (Precursor) GN=At3g57050 OS=Arabidopsis thaliana (Mouse-ear cress) PE=1 SV=1	cystathionine beta-lyase, putative [Ricinus communis]
	VF03167	0	0	0	0	0	1.28334	Acetylajmalan esterase {ECO:0000303|PubMed:16133216} (Precursor) OS=Rauvolfia serpentina (Serpentine wood) PE=1 SV=1	hypothetical protein JCGZ_23299 [Jatropha curcas]
	VF03128	0.0133516	0	0.0200988	0.044281	0.0617027	12.1756	UDP-glycosyltransferase 74E2 GN=UGT74E2 OS=Arabidopsis thaliana (Mouse-ear cress) PE=1 SV=1	UDP-glucosyltransferase, putative [Ricinus communis]
	VF03079	0.419786	1.32289e-06	0.15561	0.418511	0.147626	3.03131	Probable serine/threonine-protein kinase RLCKVII GN=At1g07870 OS=Arabidopsis thaliana (Mouse-ear cress) PE=2 SV=1	hypothetical protein JCGZ_21243 [Jatropha curcas]
	VF03062	0.0343265	0	0	0	0.354294	3.68551	Putative F-box/FBD/LRR-repeat protein At4g03220 GN=At4g03220 OS=Arabidopsis thaliana (Mouse-ear cress) PE=3 SV=1	F-box family protein [Populus trichocarpa]
	VF03015	0.886302	0.213597	0.259997	2.152	3.82491	22.2101	Protein trichome birefringence-like 43 GN=TBL43 OS=Arabidopsis thaliana (Mouse-ear cress) PE=2 SV=1	hypothetical protein JCGZ_03938 [Jatropha curcas]
	VF02997	172.413	333.274	340.074	270.38	349.496	722.361	Major allergen Pru ar 1 OS=Prunus armeniaca (Apricot) PE=1 SV=1	hypothetical protein JCGZ_18946 [Jatropha curcas]
	VF02913	4.91359	8.89584	10.3359	5.56585	9.68445	36.8054	Protein trichome birefringence-like 38 GN=TBL38 OS=Arabidopsis thaliana (Mouse-ear cress) PE=2 SV=1	hypothetical protein JCGZ_21547 [Jatropha curcas]
	VF02873	6.32501	2.72906	3.44149	6.83182	3.90845	21.3118	Uncharacterized protein At1g04910 GN=At1g04910 OS=Arabidopsis thaliana (Mouse-ear cress) PE=2 SV=1	hypothetical protein POPTR_0011s07160g [Populus trichocarpa]
	VF02864	2.87997	5.02932	3.97828	2.82534	3.10145	20.5605	Cellulose synthase A catalytic subunit 8 [UDP-forming] GN=F28A21.190 OS=Arabidopsis thaliana (Mouse-ear cress) PE=1 SV=1	hypothetical protein JCGZ_21594 [Jatropha curcas]
	VF02838	0.453324	0.546983	0.314637	0.267582	0.259445	1.42244	--	conserved hypothetical protein [Ricinus communis]
	VF02831	3.36599	2.72452	3.25772	12.5487	5.66457	29.9928	Aquaporin NIP1-2, N-terminally processed GN=F13C5.80 OS=Arabidopsis thaliana (Mouse-ear cress) PE=2 SV=2	Aquaporin NIP1.1, putative [Ricinus communis]
	VF02822	0	0	0	0	0	2.23731	MLP-like protein 31 GN=MLP31 OS=Arabidopsis thaliana (Mouse-ear cress) PE=2 SV=2	PREDICTED: MLP-like protein 28-like [Citrus sinensis]
	VF02811	22.2531	20.6817	34.2328	10.5985	15.3153	113.886	Probable sulfate transporter 3.3 GN=SULTR3;3 OS=Arabidopsis thaliana (Mouse-ear cress) PE=2 SV=2	sulfate transporter, putative [Ricinus communis]
	VF02781	2.7798	3.226	1.29511	1.51387	1.74762	10.0867	Heavy metal-associated isoprenylated plant protein 26 (Precursor) GN=F20M13.140 OS=Arabidopsis thaliana (Mouse-ear cress) PE=1 SV=1	metal ion binding protein, putative [Ricinus communis]
	VF02776	0.565876	0.315735	1.01278	0.599088	0.160675	22.9105	--	hypothetical protein JCGZ_04672 [Jatropha curcas]
	VF02765	0	0	0	0	0.0756345	1.52557	Phospholipase A1-Igamma1, chloroplastic (Precursor) GN=At1g06800 OS=Arabidopsis thaliana (Mouse-ear cress) PE=1 SV=2	Alpha/beta-Hydrolases superfamily protein [Theobroma cacao]
	VF02712	2.32522	2.39745	1.3277	1.38031	2.35449	5.1212	Glucan endo-1,3-beta-glucosidase 11 (Precursor) GN=At1g32860 OS=Arabidopsis thaliana (Mouse-ear cress) PE=1 SV=1	hypothetical protein JCGZ_04623 [Jatropha curcas]
	VF02704	0.141581	0.288963	0.164679	0.258575	0.561426	3.06925	--	hypothetical protein JCGZ_04616 [Jatropha curcas]
	VF02668	0.126197	0.050409	0.101593	0.0282771	1.01431	135.479	Probable beta-D-xylosidase 5 (Precursor) GN=BXL5 OS=Arabidopsis thaliana (Mouse-ear cress) PE=2 SV=2	hypothetical protein JCGZ_04582 [Jatropha curcas]
	VF02643	0.118732	0.127995	0.27555	0.163644	0.580335	175.734	Probable beta-D-xylosidase 5 (Precursor) GN=BXL5 OS=Arabidopsis thaliana (Mouse-ear cress) PE=2 SV=2	PREDICTED: probable beta-D-xylosidase 5 [Nelumbo nucifera]
	VF02638	0.0842775	0.0790596	0.0483618	0.0854327	0.120058	33.2779	ABC transporter B family member 9 GN=F15J5.20 OS=Arabidopsis thaliana (Mouse-ear cress) PE=3 SV=2	hypothetical protein JCGZ_21659 [Jatropha curcas]
	VF02631	3.87688	7.47083	6.70658	4.01717	9.57811	22.9364	Protein SRG1 GN=SRG1 OS=Arabidopsis thaliana (Mouse-ear cress) PE=2 SV=1	hypothetical protein JCGZ_21653 [Jatropha curcas]
	VF02612	0	0	0	0	0	1.31264	Nudix hydrolase 7 GN=T20K18.70 OS=Arabidopsis thaliana (Mouse-ear cress) PE=1 SV=1	hypothetical protein JCGZ_00545 [Jatropha curcas]
	VF02536	0	0	0	0	0	6.82381	Protein MIZU-KUSSEI 1 GN=MIZ1 OS=Arabidopsis thaliana (Mouse-ear cress) PE=1 SV=1	hypothetical protein JCGZ_03095 [Jatropha curcas]
	VF02504	0	0.0265289	0	0	0	1.75275	Isoprene synthase, chloroplastic (Precursor) GN=ISPS OS=Populus alba (White poplar) PE=1 SV=1	hypothetical protein JCGZ_20298 [Jatropha curcas]
	VF02490	0.274594	0.179708	0	0.241426	0.241792	3.32662	Exocyst complex component EXO70B1 GN=EXO70B1 OS=Arabidopsis thaliana (Mouse-ear cress) PE=1 SV=1	protein binding protein, putative [Ricinus communis]
	VF02447	6.28961	4.03345	3.4429	3.11601	7.29653	18.4828	Phenolic glucoside malonyltransferase 1 GN=PMAT1 OS=Arabidopsis thaliana (Mouse-ear cress) PE=1 SV=1	Anthocyanin 5-aromatic acyltransferase, putative [Ricinus communis]
	VF02428	0.790755	0.617378	0.365704	0.593492	1.01547	12.2601	UPF0392 protein RCOM_0530710 GN=RCOM_0530710 OS=Ricinus communis (Castor bean) PE=3 SV=1	hypothetical protein JCGZ_10187 [Jatropha curcas]
	VF02349	2.22338	1.66022	1.60052	1.9519	1.18483	5.75252	Shikimate O-hydroxycinnamoyltransferase GN=HST OS=Nicotiana tabacum (Common tobacco) PE=1 SV=1	hydroxycinnamoyl-CoA shikimate/quinate hydroxycinnamoyl transferase [Coffea arabica]
	VF02219	9.70092	7.77862	8.71402	9.49356	11.3386	32.5978	--	hypothetical protein JCGZ_19581 [Jatropha curcas]
	VF02214	3.37647	0.0719073	0.0223547	5.66108	1.29871	38.5267	Mannan endo-1,4-beta-mannosidase 5 (Precursor) GN=MAN5 OS=Solanum lycopersicum (Tomato) PE=2 SV=1	PREDICTED: mannan endo-1,4-beta-mannosidase 5-like [Glycine max]
	VF02213	6.42688	4.98718	5.0184	5.91951	4.77345	14.7971	TMV resistance protein N GN=N OS=Nicotiana glutinosa (Tobacco) PE=1 SV=1	hypothetical protein CISIN_1g044535mg, partial [Citrus sinensis]
	VF02181	31.4267	35.2748	53.1381	30.1416	45.2035	165.291	Cytochrome b561 and DOMON domain-containing protein At3g25290 (Precursor) GN=At3g25290 OS=Arabidopsis thaliana (Mouse-ear cress) PE=2 SV=1	hypothetical protein JCGZ_15128 [Jatropha curcas]
	VF02180	0.301171	0	0	0	0.071512	155.441	Cytochrome b561 and DOMON domain-containing protein At3g25290 (Precursor) GN=At3g25290 OS=Arabidopsis thaliana (Mouse-ear cress) PE=2 SV=1	hypothetical protein JCGZ_15129 [Jatropha curcas]
	VF02175	1.0936	1.53855	0.806495	1.8835	1.61306	7.5157	Serine/threonine-protein kinase OXI1 GN=At3g25250 OS=Arabidopsis thaliana (Mouse-ear cress) PE=1 SV=1	hypothetical protein JCGZ_15132 [Jatropha curcas]
	VF02142	7.48714	5.90287	6.5122	7.5799	5.51546	59.2665	Pentatricopeptide repeat-containing protein At3g24000, mitochondrial (Precursor) GN=PCMP-H87 OS=Arabidopsis thaliana (Mouse-ear cress) PE=3 SV=1	hypothetical protein JCGZ_02948 [Jatropha curcas]
	VF02130	0.795931	2.15984	1.77458	1.18642	1.67625	20.4564	--	hypothetical protein JCGZ_00708 [Jatropha curcas]
	VF02092	0	0.10463	0.0346808	0	2.6535	56.2678	3-hydroxyisobutyryl-CoA hydrolase 1 GN=CHY1 OS=Arabidopsis thaliana (Mouse-ear cress) PE=1 SV=1	hypothetical protein JCGZ_09238 [Jatropha curcas]
	VF02091	0	0.0419653	0.145526	0.611323	3.85411	90.3513	Secoisolariciresinol dehydrogenase (Fragment) OS=Forsythia intermedia (Border forsythia) PE=1 SV=1	hypothetical protein JCGZ_09237 [Jatropha curcas]
	VF02083	0.0816367	2.6922e-35	0.0142596	0.176343	7.04535e-06	1.07479	Cationic amino acid transporter 1 GN=F7J7.60 OS=Arabidopsis thaliana (Mouse-ear cress) PE=1 SV=1	hypothetical protein JCGZ_09233 [Jatropha curcas]
	VF02076	873.921	754.437	578.227	1113.67	960.576	2428.04	Metallothionein-like protein type 3 OS=Carica papaya (Papaya) PE=3 SV=1	conserved hypothetical protein [Ricinus communis]
	VF02055	26.0193	53.5915	55.1517	24.4211	36.651	116.186	4-alpha-glucanotransferase DPE1, chloroplastic/amyloplastic (Precursor) GN=DPE1 OS=Arabidopsis thaliana (Mouse-ear cress) PE=2 SV=1	hypothetical protein JCGZ_09399 [Jatropha curcas]
	VF02027	0.40166	1.65302	2.91452	0.339262	1.14563	217.592	Probable sulfate transporter 3.5 GN=SULTR3;5 OS=Arabidopsis thaliana (Mouse-ear cress) PE=2 SV=1	hypothetical protein JCGZ_13227 [Jatropha curcas]
	VF02001	14.3473	9.47994	13.2125	17.6602	13.4209	81.4193	Rho GDP-dissociation inhibitor 1 GN=GDI1 OS=Arabidopsis thaliana (Mouse-ear cress) PE=1 SV=1	hypothetical protein JCGZ_13796 [Jatropha curcas]
	VF01994	16.1226	18.4865	12.7308	17.6068	18.3722	37.1968	--	S-adenosylmethionine-dependent methyltransferase [Jatropha curcas]
	VF01935	0.370217	0.341679	0.280611	0.289937	0.487329	27.8945	Aldehyde dehydrogenase family 2 member B7, mitochondrial (Precursor) OS=Arabidopsis thaliana (Mouse-ear cress) PE=2 SV=2	PREDICTED: aldehyde dehydrogenase family 2 member B7, mitochondrial [Prunus mume]
	VF01927	0.640701	1.01145	1.04106	0.64133	1.66279	3.32741	E3 ubiquitin-protein ligase ATL4 GN=F27H5_10 OS=Arabidopsis thaliana (Mouse-ear cress) PE=1 SV=1	zinc finger protein, putative [Ricinus communis]
	VF01912	0.0288416	0.0795757	0	0	0	5.74515	2-methylene-furan-3-one reductase (Precursor) GN=EO OS=Solanum lycopersicum (Tomato) PE=1 SV=1	unknown [Populus trichocarpa]
	VF01907	1.35624	1.10496	2.58342	0.995599	1.28252	10.2426	--	hypothetical protein JCGZ_09595 [Jatropha curcas]
	VF01901	1.36214	1.14395	0.271126	0.851342	3.3826	9.3963	Beta carbonic anhydrase 1, chloroplastic {ECO:0000303|PubMed:17407539} (Precursor) OS=Arabidopsis thaliana (Mouse-ear cress) PE=1 SV=2	hypothetical protein JCGZ_09588 [Jatropha curcas]
	VF01880	3.96365	1.22704	1.41438	2.79095	2.93365	35.0902	High affinity nitrate transporter 2.7 GN=NRT2.7 OS=Arabidopsis thaliana (Mouse-ear cress) PE=2 SV=1	hypothetical protein JCGZ_09568 [Jatropha curcas]
	VF01841	0.97309	3.77574	3.54804	0.571239	3.81088	10.0577	--	hypothetical protein JCGZ_18643 [Jatropha curcas]
	VF01838	2.27559	2.11772	3.2573	3.15012	20.1564	316.392	UDP-glycosyltransferase 87A2 GN=UGT87A2 OS=Arabidopsis thaliana (Mouse-ear cress) PE=1 SV=1	hypothetical protein JCGZ_18646 [Jatropha curcas]
	VF01828	2.65586	0.991663	1.43556	3.27949	2.15113	8.56771	Lysine histidine transporter-like 3 GN=At1g61270 OS=Arabidopsis thaliana (Mouse-ear cress) PE=3 SV=2	amino acid transporter, putative [Ricinus communis]
	VF01825	0.657228	0.884702	0.423238	1.38436	0.910884	6.1349	Ribonuclease 1 (Precursor) GN=RNS1 OS=Arabidopsis thaliana (Mouse-ear cress) PE=1 SV=1	hypothetical protein JCGZ_15611 [Jatropha curcas]
	VF01786	0.550083	0.99882	0.478347	0.410562	0.745988	22.0686	Coumaroyl-CoA:anthocyanidin 3-O-glucoside-6&apos;&apos;-O-coumaroyltransferase 1 GN=3AT1 OS=Arabidopsis thaliana (Mouse-ear cress) PE=1 SV=1	Anthocyanin 5-aromatic acyltransferase, putative [Ricinus communis]
	VF01779	0	0	0	0	0.073577	1.00537	Ubiquinol oxidase 1a, mitochondrial (Precursor) GN=MCB17.11 OS=Arabidopsis thaliana (Mouse-ear cress) PE=1 SV=2	Alternative oxidase 1B [Theobroma cacao]
	VF01766	0.0526585	0.0222127	0.041604	0	0.0344731	2.1776	Lysine histidine transporter-like 8 GN=AATL1 OS=Arabidopsis thaliana (Mouse-ear cress) PE=1 SV=1	hypothetical protein JCGZ_00046 [Jatropha curcas]
	VF01715	2.29272	0.114844	0.12338	1.53029	0.299951	6.64846	ABSCISIC ACID-INSENSITIVE 5-like protein 1 GN=F14L2.10 OS=Arabidopsis thaliana (Mouse-ear cress) PE=1 SV=1	hypothetical protein JCGZ_15213 [Jatropha curcas]
	VF01701	0.377544	0.204373	0.197556	0.3435	0.557144	9.37251	Probable calcium-binding protein CML48 GN=CML48 OS=Arabidopsis thaliana (Mouse-ear cress) PE=2 SV=2	Peflin, putative [Ricinus communis]
	VF01549	3.93549	3.50529	7.28098	3.69916	2.43124	24.461	Probable E3 ubiquitin-protein ligase BAH1-like 1 GN=OsI_27296 OS=Oryza sativa subsp. indica (Rice) PE=3 SV=1	hypothetical protein JCGZ_13918 [Jatropha curcas]
	VF01538	9.96637	6.92483	9.64775	11.574	13.6697	57.9753	Stress-related protein GN=SRP OS=Vitis riparia (Frost grape) PE=2 SV=1	hypothetical protein JCGZ_13909 [Jatropha curcas]
	VF01531	1.1632	2.97649	3.24577	0.766569	2.41251	14.1233	Putative indole-3-acetic acid-amido synthetase GH3.9 GN=GH3.9 OS=Arabidopsis thaliana (Mouse-ear cress) PE=2 SV=1	Indole-3-acetic acid-amido synthetase GH3.17, putative [Ricinus communis]
	VF01494	1.15844	1.75048	1.51807	1.71169	2.47135	5.14953	BTB/POZ domain-containing protein At1g03010 GN=At1g03010 OS=Arabidopsis thaliana (Mouse-ear cress) PE=2 SV=1	protein binding protein, putative [Ricinus communis]
	VF01492	0	0	0	0	0	1.28811	Monothiol glutaredoxin-S1 OS=Arabidopsis thaliana (Mouse-ear cress) PE=3 SV=1	glutaredoxin, grx, putative [Ricinus communis]
	VF01488	0	0.334855	0.615495	0	0	4.84056	Glutaredoxin-C11 GN=T20O10.50 OS=Arabidopsis thaliana (Mouse-ear cress) PE=3 SV=1	hypothetical protein JCGZ_13866 [Jatropha curcas]
	VF01487	15.8332	17.8322	10.4371	17.2681	32.4263	106.36	Monothiol glutaredoxin-S9 GN=T6B20.11 OS=Arabidopsis thaliana (Mouse-ear cress) PE=3 SV=1	hypothetical protein JCGZ_13865 [Jatropha curcas]
	VF01473	2.55351	1.2147	0.901209	1.44701	0.529653	6.77876	Probable indole-3-pyruvate monooxygenase YUCCA10 GN=F27K7.7 OS=Arabidopsis thaliana (Mouse-ear cress) PE=2 SV=1	hypothetical protein POPTR_0020s00240g [Populus trichocarpa]
	VF01407	0.178225	0.0337064	0.125165	0.249795	0.211317	2.55432	Putative glucose-6-phosphate 1-epimerase OS=Cenchrus ciliaris (Buffelgrass) PE=2 SV=1	hypothetical protein JCGZ_26937 [Jatropha curcas]
	VF01406	0.215585	0	0	0.326067	0.0422146	268.748	Fasciclin-like arabinogalactan protein 14 (Precursor) GN=FLA14 OS=Arabidopsis thaliana (Mouse-ear cress) PE=2 SV=1	hypothetical protein JCGZ_26938 [Jatropha curcas]
	VF01377	20.3822	17.0494	43.7292	17.0228	30.7786	154.09	GDSL esterase/lipase 1 (Precursor) GN=GLIP1 OS=Arabidopsis thaliana (Mouse-ear cress) PE=1 SV=1	hypothetical protein JCGZ_24643 [Jatropha curcas]
	VF01362	4.02555	3.3956	4.82929	4.4855	7.43577	24.798	Metal-nicotianamine transporter YSL3 GN=YSL3 OS=Arabidopsis thaliana (Mouse-ear cress) PE=2 SV=1	hypothetical protein JCGZ_16395 [Jatropha curcas]
	VF01313	0	0	0	0	0	1.13038	Heparanase-like protein 2 (Precursor) GN=At5g61250 OS=Arabidopsis thaliana (Mouse-ear cress) PE=2 SV=1	PREDICTED: heparanase-like protein 1 [Eucalyptus grandis]
	VF01312	0.0207958	0.0328415	0.0149725	0	2.28419	31.8664	Heparanase-like protein 2 (Precursor) GN=At5g61250 OS=Arabidopsis thaliana (Mouse-ear cress) PE=2 SV=1	PREDICTED: heparanase-like protein 2 [Populus euphratica]
	VF01302	0.836921	1.84996	2.67662	1.47918	1.90198	5.7356	Probable WRKY transcription factor 57 OS=Arabidopsis thaliana (Mouse-ear cress) PE=2 SV=1	hypothetical protein POPTR_0010s16760g [Populus trichocarpa]
	VF01301	1.17066	0.555134	1.11841	1.67669	1.63611	4.43121	Zinc finger protein ZAT4 GN=ZAT4 OS=Arabidopsis thaliana (Mouse-ear cress) PE=2 SV=1	hypothetical protein JCGZ_15690 [Jatropha curcas]
	VF01296	0.659371	0.00649628	0.689735	0.00100194	0.092421	1.38058	--	hypothetical protein JCGZ_15696 [Jatropha curcas]
	VF01292	20.1701	27.4827	28.2674	19.1864	22.5106	206.525	14-3-3-like protein GF14 iota GN=GRF12 OS=Arabidopsis thaliana (Mouse-ear cress) PE=2 SV=1	hypothetical protein JCGZ_15699 [Jatropha curcas]
	VF01267	146.963	79.4175	47.9333	123.763	57.6078	1001.39	GDSL esterase/lipase APG (Precursor) GN=APG OS=Arabidopsis thaliana (Mouse-ear cress) PE=1 SV=1	hypothetical protein JCGZ_24833 [Jatropha curcas]
	VF01264	0	0	0	0	0	1.13897	Probable LRR receptor-like serine/threonine-protein kinase At1g07560 (Precursor) GN=At1g07560 OS=Arabidopsis thaliana (Mouse-ear cress) PE=2 SV=1	Serine/threonine-protein kinase-transforming protein raf, putative [Ricinus communis]
	VF01229	0	0.747017	0.57563	0.480365	0.2366	1.53912	--	conserved hypothetical protein [Ricinus communis]
	VF01179	0	0.101338	0.335735	0	0.131304	7.32997	--	hypothetical protein JCGZ_20029 [Jatropha curcas]
	VF01129	1.68808	0.74195	0.588287	1.21884	1.2768	4.77583	Copper transporter 1 GN=COPT1 OS=Arabidopsis thaliana (Mouse-ear cress) PE=2 SV=2	hypothetical protein JCGZ_23754 [Jatropha curcas]
	VF01109	0	4.32678	2.14731	1.12189	3.40956	11.6571	--	hypothetical protein JCGZ_09061 [Jatropha curcas]
	VF01108	2.9112	5.87791	5.84506	2.1463	4.86118	23.9974	--	hypothetical protein JCGZ_16255 [Jatropha curcas]
	VF01078	16.4656	8.50817	11.3229	13.8964	13.2471	40.3104	Ras-related protein RABH1e GN=RABH1E OS=Arabidopsis thaliana (Mouse-ear cress) PE=2 SV=1	protein with unknown function [Ricinus communis]
	VF01064	2.22503	3.20162	2.50955	2.72103	1.91813	102.085	ABC transporter G family member 15 GN=MSA6.13 OS=Arabidopsis thaliana (Mouse-ear cress) PE=2 SV=2	PREDICTED: ABC transporter G family member 15-like isoform X1 [Populus euphratica]
	VF01016	0.411159	0	0	0.247529	0.966142	19.5168	--	hypothetical protein JCGZ_01314 [Jatropha curcas]
	VF00975	0	0	1.42231	0	0.425526	6.33162	--	conserved hypothetical protein [Ricinus communis]
	VF00973	0.0353703	0	0.0177641	0.0961527	0.0753641	2.00293	Serine/threonine-protein kinase OS=Arabidopsis thaliana (Mouse-ear cress) PE=1 SV=2	hypothetical protein POPTR_0018s14380g [Populus trichocarpa]
	VF00923	0.0560426	0.0270025	0.165397	0.00818995	3.78991	26.9551	--	PREDICTED: uncharacterized protein LOC105133011 [Populus euphratica]
	VF00915	18.4152	26.1877	34.6145	34.8839	91.2817	248.609	--	hypothetical protein JCGZ_13373 [Jatropha curcas]
	VF00905	0.26657	0.841077	0.203905	0.214898	0.595852	1.77331	Receptor-like protein kinase HAIKU2 (Precursor) GN=IKU2 OS=Arabidopsis thaliana (Mouse-ear cress) PE=1 SV=1	PREDICTED: leucine-rich repeat receptor-like protein kinase PEPR2 [Malus domestica]
	VF00855	1.02717	0.812449	0.704136	0.925901	1.20601	3.43374	Chaperone protein dnaJ 10 GN=F28O16.7 OS=Arabidopsis thaliana (Mouse-ear cress) PE=2 SV=2	hypothetical protein JCGZ_25268 [Jatropha curcas]
	VF00830	32.1355	38.4024	72.5647	25.1526	116.151	343.501	Alcohol dehydrogenase 1 GN=ADH1 OS=Petunia hybrida (Petunia) PE=3 SV=1	hypothetical protein JCGZ_25236 [Jatropha curcas]
	VF00811	5.65695	5.60335	2.28428	7.35725	8.51703	33.5991	Dof zinc finger protein DOF1.2 GN=DOF1.2 OS=Arabidopsis thaliana (Mouse-ear cress) PE=2 SV=1	hypothetical protein JCGZ_25217 [Jatropha curcas]
	VF00775	0	0.0881387	0.0217429	0.189375	0.11571	1.44647	--	Gamma-glutamyl-gamma-aminobutyrate hydrolase, putative [Ricinus communis]
	VF00757	35.5047	20.9023	16.6064	38.764	24.726	86.7292	Probable aquaporin NIP5-1 GN=F24G24.180 OS=Arabidopsis thaliana (Mouse-ear cress) PE=2 SV=1	PREDICTED: probable aquaporin NIP5-1-like [Cucumis sativus]
	VF00750	17.7058	16.4965	24.3293	16.8393	12.3707	61.0424	Probable methyltransferase PMT18 GN=At1g33170 OS=Arabidopsis thaliana (Mouse-ear cress) PE=2 SV=1	hypothetical protein JCGZ_20343 [Jatropha curcas]
	VF00703	0.0107771	0	0	0	0.0277175	2.24432	Phosphatidylinositol 4-phosphate 5-kinase 4 GN=PIP5K4 OS=Arabidopsis thaliana (Mouse-ear cress) PE=3 SV=1	hypothetical protein JCGZ_16656 [Jatropha curcas]
	VF00628	0.595044	0.71539	0.427907	0.6648	0.840544	13.2776	Type I inositol 1,4,5-trisphosphate 5-phosphatase 12 GN=F6E13.3 OS=Arabidopsis thaliana (Mouse-ear cress) PE=1 SV=1	PREDICTED: type I inositol 1,4,5-trisphosphate 5-phosphatase 12-like [Populus euphratica]
	VF00626	0	0	0.0206845	0	0	2.63828	Polygalacturonase (Precursor) OS=Prunus persica (Peach) PE=2 SV=1	hypothetical protein JCGZ_19274 [Jatropha curcas]
	VF00621	0	0.240177	0	0	0	2.07686	Polygalacturonase (Precursor) OS=Prunus persica (Peach) PE=2 SV=1	hypothetical protein JCGZ_19278 [Jatropha curcas]
	VF00614	1.09196	0.125274	0.242481	1.08465	13.9579	101.536	O-acyltransferase WSD1 GN=WSD1 OS=Arabidopsis thaliana (Mouse-ear cress) PE=2 SV=1	hypothetical protein JCGZ_23992 [Jatropha curcas]
	VF00613	1.10858	0.616605	0.498761	1.0641	1.09412	2.5431	O-acyltransferase WSD1 GN=WSD1 OS=Arabidopsis thaliana (Mouse-ear cress) PE=2 SV=1	hypothetical protein JCGZ_23993 [Jatropha curcas]
	VF00608	0.16177	0.0646853	0.1301	0.133965	2.25551	286	Probable beta-D-xylosidase 5 (Precursor) GN=BXL5 OS=Arabidopsis thaliana (Mouse-ear cress) PE=2 SV=2	hypothetical protein JCGZ_04582 [Jatropha curcas]
	VF00548	1.29595	1.37393	0.330905	0.571625	0.986129	10.0969	Cytochrome P450 81E8 {ECO:0000303|PubMed:14617078} OS=Medicago truncatula (Barrel medic) PE=2 SV=1	hypothetical protein JCGZ_12475 [Jatropha curcas]
	VF00544	0.386229	0.177044	0.411736	0.213999	0.602747	1.61257	Zinc finger protein 1 GN=ZFP1 OS=Arabidopsis thaliana (Mouse-ear cress) PE=2 SV=1	zinc finger protein, putative [Ricinus communis]
	VF00486	37.1044	33.8458	34.2792	33.4966	27.6412	105.715	Calcium-transporting ATPase 2, plasma membrane-type GN=ACA2 OS=Arabidopsis thaliana (Mouse-ear cress) PE=1 SV=1	cation-transporting atpase plant, putative [Ricinus communis]
	VF00473	0.0241423	0	0	0.0273717	0	1.06825	--	PREDICTED: uncharacterized protein LOC100855167 [Vitis vinifera]
	VF00457	23.8021	19.9676	21.2052	24.7822	29.2252	71.6062	Heptahelical transmembrane protein 4 GN=HHP4 OS=Arabidopsis thaliana (Mouse-ear cress) PE=2 SV=1	hypothetical protein JCGZ_12551 [Jatropha curcas]
	VF00442	0.100642	0.135419	0.05308	0.182609	0.358808	2.96579	ACT domain-containing protein ACR1 {ECO:0000305} OS=Arabidopsis thaliana (Mouse-ear cress) PE=2 SV=1	hypothetical protein JCGZ_12562 [Jatropha curcas]
	VF00441	0.634619	0.218961	0	0.414166	0.786064	3.94287	Protein PHLOEM PROTEIN 2-LIKE A10 GN=PP2A10 OS=Arabidopsis thaliana (Mouse-ear cress) PE=2 SV=1	hypothetical protein JCGZ_12563 [Jatropha curcas]
	VF00314	0.140651	0.938419	0.201946	0.182686	0.151062	11.8406	Ras-related protein RHN1 GN=RHN1 OS=Nicotiana plumbaginifolia (Leadwort-leaved tobacco) PE=2 SV=1	hypothetical protein JCGZ_22869 [Jatropha curcas]
	VF00270	0.171294	0.172194	0.27563	0.535084	0.113248	11.4902	--	hypothetical protein JCGZ_23850 [Jatropha curcas]
	VF00210	0.447401	0.117997	0.332419	0.223448	7.92154	70.9189	NAC transcription factor NAM-2 GN=NAM-2 OS=Hordeum vulgare var. distichum (Domesticated barley) PE=3 SV=1	NAC domain protein, IPR003441 [Theobroma cacao]
	VF00145	0	0	0	0	0	6.60434	--	PREDICTED: uncharacterized protein LOC105131187 isoform X1 [Populus euphratica]
	VF00079	1.27942	0.68522	0.37875	1.07431	0.697899	5.80567	--	conserved hypothetical protein [Ricinus communis]
	VF00078	0.368924	0.0927131	0.0708165	0.42533	0.186291	1.8805	BTB/POZ domain-containing protein At5g17580 GN=At5g17580 OS=Arabidopsis thaliana (Mouse-ear cress) PE=2 SV=1	hypothetical protein JCGZ_02600 [Jatropha curcas]
	VF00061	0.224993	1.06567	0.901522	1.03678	1.28858	3.26164	Auxin-induced protein 15A OS=Glycine max (Soybean) PE=2 SV=1	hypothetical protein JCGZ_02614 [Jatropha curcas]
	VFNG998	0.0623915	0.348947	0.165868	1.23738	0.258602	87.1573	--	conserved hypothetical protein [Ricinus communis]
	VFNG996	0.057533	0.0482582	0	0.189129	0.0469926	102.927	--	conserved hypothetical protein [Ricinus communis]
	VFNG95	0.0811009	0	0	0	0	55.607	Exopolygalacturonase (Fragment) OS=Oenothera organensis (Evening primrose) PE=2 SV=1	PREDICTED: exopolygalacturonase-like [Eucalyptus grandis]
	VFNG889	0.0994161	0.0550435	0.354303	0.182511	0.236345	1.73912	Putative ribonuclease H protein At1g65750 GN=At1g65750 OS=Arabidopsis thaliana (Mouse-ear cress) PE=3 SV=1	PREDICTED: putative ribonuclease H protein At1g65750 [Prunus mume]
	VFNG862	0	0	0	0	0.0458025	1.70355	Putative F-box protein At3g16210 GN=At3g16210 OS=Arabidopsis thaliana (Mouse-ear cress) PE=3 SV=1	hypothetical protein JCGZ_09176 [Jatropha curcas]
	VFNG861	0	0.168044	0.240786	0	0.133984	1.12563	Threonine synthase 1, chloroplastic (Precursor) GN=F27B13.80 OS=Arabidopsis thaliana (Mouse-ear cress) PE=1 SV=1	hypothetical protein JCGZ_24732 [Jatropha curcas]
	VFNG827	0	0	0	0	0	2.66495	Uncharacterized mitochondrial protein AtMg00810 GN=AtMg00810 OS=Arabidopsis thaliana (Mouse-ear cress) PE=4 SV=1	hypothetical protein VITISV_015039 [Vitis vinifera]
	VFNG789	0.489273	0.39717	0.305684	0	0.208856	34.792	Low temperature-induced protein lt101.2 GN=LT101.2 OS=Hordeum vulgare (Barley) PE=2 SV=1	PREDICTED: salt stress-induced hydrophobic peptide ESI3 [Phoenix dactylifera]
	VFNG729	0.243536	0	0	0.411042	0.402835	2.44283	Serine carboxypeptidase-like 18 (Precursor) GN=SCPL18 OS=Arabidopsis thaliana (Mouse-ear cress) PE=2 SV=2	hypothetical protein CISIN_1g012276mg [Citrus sinensis]
	VFNG71	0.582572	0.209774	0.117562	0.55709	0.13035	4.51771	--	PREDICTED: uncharacterized protein LOC104877560 [Vitis vinifera]
	VFNG68	0.092158	0.0754887	0.0342633	0	0.603529	131.986	Senescence-specific cysteine protease SAG39 {ECO:0000305} (Precursor) OS=Oryza sativa subsp. indica (Rice) PE=3 SV=1	PREDICTED: senescence-specific cysteine protease SAG39-like [Populus euphratica]
	VFNG6379	0	0.0202364	0	0	0	2.26874	Putative ribonuclease H protein At1g65750 GN=At1g65750 OS=Arabidopsis thaliana (Mouse-ear cress) PE=3 SV=1	PREDICTED: uncharacterized protein LOC103438319 [Malus domestica]
	VFNG6343	0.689393	0	0.105746	1.11326	1.96293	5.03171	Probable (S)-N-methylcoclaurine 3&apos;-hydroxylase isozyme 2 GN=CYP80B2 OS=Coptis japonica (Japanese goldthread) PE=2 SV=1	hypothetical protein JCGZ_20659 [Jatropha curcas]
	VFNG6338	0.0405412	0.0170695	0	0	1.13277	3.08409	Endonuclease OS=Nicotiana tabacum (Common tobacco) PE=2 SV=1	hypothetical protein VITISV_004139 [Vitis vinifera]
	VFNG6037	0.0651232	0.0234841	0.0477702	0	0	159.749	Glutathione S-transferase U7 GN=F16P2.20 OS=Arabidopsis thaliana (Mouse-ear cress) PE=2 SV=1	glutathione s-transferase, putative [Ricinus communis]
	VFNG6031	0	0.041168	0.0793018	0	0	2.86883	CLE5p (Precursor) GN=T16B12 OS=Arabidopsis thaliana (Mouse-ear cress) PE=2 SV=2	conserved hypothetical protein [Ricinus communis]
	VFNG5983	0	0	0	0.0422336	0	1.78944	Short-chain dehydrogenase reductase 3b GN=F14M4 OS=Arabidopsis thaliana (Mouse-ear cress) PE=2 SV=1	PREDICTED: short-chain dehydrogenase reductase 3b-like [Populus euphratica]
	VFNG587	0	0	0	0	0	1.62373	--	PREDICTED: replication protein A 70 kDa DNA-binding subunit B-like, partial [Beta vulgaris subsp. vulgaris]
	VFNG5867	0	0.0582074	0.102001	0.0275876	0	1.07811	Tetraketide alpha-pyrone reductase 1 GN=F23E12.20 OS=Arabidopsis thaliana (Mouse-ear cress) PE=2 SV=1	cinnamoyl-CoA reductase, putative [Ricinus communis]
	VFNG5685	24.4875	27.8119	21.8061	28.3043	27.9306	58.6787	Vesicle-associated protein 4-1 GN=MJP23.9 OS=Arabidopsis thaliana (Mouse-ear cress) PE=2 SV=1	hypothetical protein JCGZ_00709 [Jatropha curcas]
	VFNG5669	0	0	0	0	0	7.78079	--	hypothetical protein VITISV_021625 [Vitis vinifera]
	VFNG5632	0.670707	0.897828	1.23914	0.516305	0.915928	3.89338	Disease resistance protein RPM1 GN=F17A9.20 OS=Arabidopsis thaliana (Mouse-ear cress) PE=1 SV=1	Disease resistance protein RPM1, putative [Ricinus communis]
	VFNG563	0	0	0	0	0.221217	1.02012	Putative ribonuclease H protein At1g65750 GN=At1g65750 OS=Arabidopsis thaliana (Mouse-ear cress) PE=3 SV=1	GDSL esterase/lipase [Medicago truncatula]
	VFNG5624	1.56937	1.10668	1.52664	1.33254	1.81173	5.94813	--	hypothetical protein POPTR_0727s00210g [Populus trichocarpa]
	VFNG5610	1.26614	0.51516	3.02746	1.43363	0.295573	8.09004	1-aminocyclopropane-1-carboxylate oxidase homolog 1 GN=At1g06620 OS=Arabidopsis thaliana (Mouse-ear cress) PE=2 SV=1	PREDICTED: 1-aminocyclopropane-1-carboxylate oxidase homolog 1-like [Populus euphratica]
	VFNG5545	0.0277495	0.032574	0.00957055	0.0103265	0.0283792	1.3601	Probably inactive leucine-rich repeat receptor-like protein kinase At3g28040 (Precursor) GN=At3g28040 OS=Arabidopsis thaliana (Mouse-ear cress) PE=2 SV=1	hypothetical protein JCGZ_06105 [Jatropha curcas]
	VFNG5513	8.11446	21.4398	4.15189	6.13102	30.1244	85.3808	Indole-3-acetic acid-amido synthetase GH3.6 GN=F24B18.13 OS=Arabidopsis thaliana (Mouse-ear cress) PE=1 SV=1	Indole-3-acetic acid-amido synthetase GH3.6, putative [Ricinus communis]
	VFNG5512	1.49335	0.745789	1.44525	1.75534	1.3932	4.31725	Endonuclease OS=Nicotiana tabacum (Common tobacco) PE=2 SV=1	polyprotein-like, putative [Medicago truncatula]
	VFNG5402	0.139186	0.0533051	0.0182852	0.103814	0.193754	1.8838	Uncharacterized mitochondrial protein AtMg00860 GN=AtMg00860 OS=Arabidopsis thaliana (Mouse-ear cress) PE=4 SV=1	hypothetical protein VITISV_035856 [Vitis vinifera]
	VFNG5388	0.499765	1.15006	0.908025	0.659528	0.601737	3.1081	--	PREDICTED: uncharacterized protein LOC103340732 [Prunus mume]
	VFNG5384	0.0617315	0	0.271168	0.0484075	11.508	89.6893	Non-specific lipid-transfer protein 13 (Precursor) GN=LTP13 OS=Arabidopsis thaliana (Mouse-ear cress) PE=2 SV=1	PREDICTED: non-specific lipid-transfer protein 13-like [Populus euphratica]
	VFNG5362	0	0	0	0	0	1.1158	--	conserved hypothetical protein [Ricinus communis]
	VFNG536	0.105709	0.434179	0.111225	0.389775	0.186951	2.57374	7-deoxyloganetin glucosyltransferase GN=UGT85A24 OS=Gardenia jasminoides (Cape jasmine) PE=1 SV=1	PREDICTED: 7-deoxyloganetin glucosyltransferase-like [Populus euphratica]
	VFNG5320	3.7238e-05	0.00152049	0.922609	0.151125	7.01215e-05	7.62614	18.2 kDa class I heat shock protein GN=HSP18.2 OS=Medicago sativa (Alfalfa) PE=2 SV=1	hypothetical protein JCGZ_01349 [Jatropha curcas]
	VFNG5319	0.356504	0.513918	1.66482	6.09625e-05	0.173664	7.11425	--	hypothetical protein JCGZ_12434 [Jatropha curcas]
	VFNG5304	0.143563	0.212964	0.20442	0.453786	0.748795	4.23839	--	hypothetical protein VITISV_036059 [Vitis vinifera]
	VFNG5203	5.46378e-151	0	0	5.46117e-103	0.303492	157.853	Beta-glucosidase 44 (Precursor) GN=BGLU44 OS=Arabidopsis thaliana (Mouse-ear cress) PE=2 SV=1	hypothetical protein JCGZ_03615 [Jatropha curcas]
	VFNG5201	0.366285	0.274371	0.397538	0.402433	0.0663068	1.08536	Receptor-like serine/threonine-protein kinase SD1-8 (Precursor) GN=T6K22.110 OS=Arabidopsis thaliana (Mouse-ear cress) PE=1 SV=1	PREDICTED: G-type lectin S-receptor-like serine/threonine-protein kinase At4g27290 isoform X2 [Populus euphratica]
	VFNG5138	0.136048	0	0	0.23945	0	4.59221	--	PREDICTED: hydroquinone glucosyltransferase-like [Phoenix dactylifera]
	VFNG510	0	0.0733962	0.135074	0.0112129	0.0211538	1.2141	Cytochrome P450 71D10 GN=CYP71D10 OS=Glycine max (Soybean) PE=2 SV=1	hypothetical protein CICLE_v10008073mg [Citrus clementina]
	VFNG5091	0.394594	0.0884639	0.211441	0.260302	0.128016	9.42363	Serine carboxypeptidase-like 46 (Precursor) GN=SCPL46 OS=Arabidopsis thaliana (Mouse-ear cress) PE=2 SV=1	PREDICTED: serine carboxypeptidase-like 46 [Vitis vinifera]
	VFNG5074	50.3706	22.8221	11.9662	42.482	22.0028	219.022	GDSL esterase/lipase At2g04570 (Precursor) GN=At2g04570 OS=Arabidopsis thaliana (Mouse-ear cress) PE=2 SV=1	zinc finger protein, putative [Ricinus communis]
	VFNG5026	0	0	0	7.65345e-144	0	22.6846	--	PREDICTED: uncharacterized protein LOC104877560 [Vitis vinifera]
	VFNG4983	0	0	0	0	0.047773	6.25995	Putative F-box protein At3g16210 GN=At3g16210 OS=Arabidopsis thaliana (Mouse-ear cress) PE=3 SV=1	hypothetical protein JCGZ_09176 [Jatropha curcas]
	VFNG4771	0	0	0.0189235	0	0	3.68053	--	hypothetical protein POPTR_0018s11120g [Populus trichocarpa]
	VFNG4768	1.32312	1.56717	1.35413	1.73438	0.833323	42.2984	Cytochrome P450 71A26 GN=CYP71A26 OS=Arabidopsis thaliana (Mouse-ear cress) PE=3 SV=1	hypothetical protein JCGZ_11385 [Jatropha curcas]
	VFNG4753	6.0903	3.10374	0.152319	2.71416	1.49883	40.8072	Tetrahydrocannabinolic acid synthase (Precursor) OS=Cannabis sativa (Hemp) PE=1 SV=1	Reticuline oxidase precursor, putative [Ricinus communis]
	VFNG4734	0	0	0	0	0	1.3087	Endonuclease OS=Nicotiana tabacum (Common tobacco) PE=2 SV=1	hypothetical protein VITISV_024007 [Vitis vinifera]
	VFNG460	0.0445265	0	0.0624337	0.102119	0.356938	16.1964	Protein PLANT CADMIUM RESISTANCE 12 GN=PCR12 OS=Arabidopsis thaliana (Mouse-ear cress) PE=2 SV=2	hypothetical protein POPTR_0010s13790g [Populus trichocarpa]
	VFNG4558	4.02998	2.72183	3.05027	3.47567	3.20626	51.3991	--	hypothetical protein JCGZ_24657 [Jatropha curcas]
	VFNG4525	0	0.067281	0	0.0619505	0.172626	1.30524	--	hypothetical protein POPTR_0009s01450g [Populus trichocarpa]
	VFNG4424	17.6883	22.8745	12.8038	17.8314	23.4053	58.1269	Peroxisomal (S)-2-hydroxy-acid oxidase OS=Spinacia oleracea (Spinach) PE=1 SV=1	hypothetical protein JCGZ_04633 [Jatropha curcas]
	VFNG4414	2.89649	4.25929	1.42921	2.69544	6.13644	34.6239	Protein SRG1 GN=SRG1 OS=Arabidopsis thaliana (Mouse-ear cress) PE=2 SV=1	hypothetical protein JCGZ_21657 [Jatropha curcas]
	VFNG4398	0.353796	0.457479	0.489129	0.357709	0.074699	1.20672	7-deoxyloganetin glucosyltransferase GN=UGT85A24 OS=Gardenia jasminoides (Cape jasmine) PE=1 SV=1	hypothetical protein JCGZ_12718 [Jatropha curcas]
	VFNG4376	0.538401	0.680546	0.866544	1.24633	1.44893	57.3786	Cytochrome P450 84A1 GN=F23E13.110 OS=Arabidopsis thaliana (Mouse-ear cress) PE=1 SV=1	hypothetical protein JCGZ_06475 [Jatropha curcas]
	VFNG4365	1.05117	9.86453e-06	0.809701	0.589902	1.5222	3.18511	Endonuclease OS=Nicotiana tabacum (Common tobacco) PE=2 SV=1	Uncharacterized protein TCM_028976 [Theobroma cacao]
	VFNG4363	1.64156	0.244216	0.63112	0.18926	1.0659	3.72577	--	conserved hypothetical protein [Ricinus communis]
	VFNG4346	0.0264884	0.0191218	0	0.0555928	0.0516969	1.06787	Receptor-like protein 12 (Precursor) GN=RLP12 OS=Arabidopsis thaliana (Mouse-ear cress) PE=2 SV=2	hypothetical protein POPTR_0011s10610g [Populus trichocarpa]
[truncated: 45 more rows]
