# Supplementary material for: New Insights of Salicylic Acid Into Stamen Abortion of Female Flowers in Tung Tree (Vernicia fordii)
Source: Front Genet. 2019 Apr 5;10:316. doi: 10.3389/fgene.2019.00316 (PMC6460477; doi:10.3389/fgene.2019.00316)
Supplement: TABLE S7 — Co-expression networks analysis of genes in different module of female flowers in Tung Tree. [file Table_7.XLSX]

## Sheet: Sheet1
Supplementary Table S7 Co-expression networks analysis of genes in different module of female flowers in Tung Tree
Module	Gene_ID	Degree	C1	C2	C3	X1	X2	X3	Swiss-Prot_annotation	NR_annotation
MEblue	VF08244	3282	6.01579	3.07679	2.9712	3.87512	2.9975	1.85859	Pentatricopeptide repeat-containing protein At2g17140 GN=At2g17140 OS=Arabidopsis thaliana (Mouse-ear cress) PE=2 SV=1	pentatricopeptide repeat-containing protein, putative [Ricinus communis]
	VF10741	3274	12.5534	6.03609	5.9303	7.60565	6.25906	3.78587	Pentatricopeptide repeat-containing protein At4g14050, mitochondrial (Precursor) OS=Arabidopsis thaliana (Mouse-ear cress) PE=2 SV=3	hypothetical protein JCGZ_13147 [Jatropha curcas]
	VF11221	3273	11.6197	8.34228	8.35384	9.33067	8.48773	7.15673	Putative pentatricopeptide repeat-containing protein At2g02150 GN=At2g02150 OS=Arabidopsis thaliana (Mouse-ear cress) PE=3 SV=1	Putative pentatricopeptide repeat-containing protein [Glycine soja]
	VF09543	3270	100.344	48.0683	48.1125	61.1475	43.7923	34.7164	CBS domain-containing protein CBSX5 GN=CBSX5 OS=Arabidopsis thaliana (Mouse-ear cress) PE=2 SV=2	conserved hypothetical protein [Ricinus communis]
	VF10992	3270	11.0287	6.20879	5.68781	7.14942	5.62321	3.72948	--	PREDICTED: uncharacterized protein LOC105112215 [Populus euphratica]
	VF18430	3269	68.6371	48.4604	47.1925	52.2442	48.5311	41.0794	Importin beta-like SAD2 {ECO:0000305} OS=Arabidopsis thaliana (Mouse-ear cress) PE=1 SV=1	hypothetical protein JCGZ_23830 [Jatropha curcas]
	VF03442	3268	7.2273	3.96337	3.56357	4.52866	3.82639	2.70812	--	hypothetical protein JCGZ_26494 [Jatropha curcas]
	VF05761	3266	9.57742	4.21165	4.40419	6.06831	4.55061	2.51741	Receptor like protein kinase S.2 GN=F24L7.6 OS=Arabidopsis thaliana (Mouse-ear cress) PE=2 SV=2	hypothetical protein JCGZ_01128 [Jatropha curcas]
	VF13144	3266	81.1826	45.5065	42.4502	52.734	39.6613	33.7217	--	calmodulin binding protein, putative [Ricinus communis]
	VF01483	3263	10.6089	4.91223	4.20826	6.04942	3.93088	2.9755	Zinc finger protein CONSTANS-LIKE 13 GN=COL13 OS=Arabidopsis thaliana (Mouse-ear cress) PE=2 SV=1	hypothetical protein RCOM_0555710 [Ricinus communis]
	VF24618	3263	11.1676	4.77476	3.80622	6.11991	3.78009	2.34031	--	hypothetical protein JCGZ_17923 [Jatropha curcas]
	VF04693	3261	21.6411	36.8203	35.9237	31.2429	37.3209	41.0824	Beta carbonic anhydrase 5, chloroplastic (Precursor) GN=BCA5 OS=Arabidopsis thaliana (Mouse-ear cress) PE=2 SV=1	hypothetical protein JCGZ_24983 [Jatropha curcas]
	VF08487	3260	21.6991	17.3954	17.4672	18.5293	17.6868	15.705	Zinc finger CCCH domain-containing protein 5 GN=At1g10320 OS=Arabidopsis thaliana (Mouse-ear cress) PE=2 SV=2	hypothetical protein JCGZ_00298 [Jatropha curcas]
	VF13766	3259	42.9147	31.7806	31.6322	34.7762	29.9285	27.9549	Phosphoribosylaminoimidazole-succinocarboxamide synthase, chloroplastic (Precursor) GN=PUR7 OS=Arabidopsis thaliana (Mouse-ear cress) PE=2 SV=2	hypothetical protein JCGZ_15851 [Jatropha curcas]
	VF20989	3259	10.3926	6.29664	5.63505	6.91906	5.83185	4.7386	--	conserved hypothetical protein [Ricinus communis]
	VF12335	3257	21.2277	14.459	14.8407	16.5741	14.1551	11.5657	Uncharacterized protein At5g08430 GN=At5g08430 OS=Arabidopsis thaliana (Mouse-ear cress) PE=1 SV=2	hypothetical protein JCGZ_01655 [Jatropha curcas]
	VF26804	3256	31.6812	25.5693	25.704	26.9137	24.9851	22.7515	3-phosphoinositide-dependent protein kinase 2 OS=Arabidopsis thaliana (Mouse-ear cress) PE=1 SV=1	hypothetical protein JCGZ_01553 [Jatropha curcas]
	VF19178	3255	8.14285	5.06257	4.92531	6.1919	4.7079	3.83452	Probable protein S-acyltransferase 15 GN=PAT15 OS=Arabidopsis thaliana (Mouse-ear cress) PE=2 SV=1	zinc finger protein, putative [Ricinus communis]
	VF05303	3251	133.203	73.9458	75.1935	84.3026	67.4154	56.848	60S ribosomal protein L34 GN=RPL34 OS=Pisum sativum (Garden pea) PE=2 SV=1	60S ribosomal protein L34 [Glycine soja]
	VF23655	3250	6.32545	3.15075	3.11379	3.68281	2.70654	1.70173	Pentatricopeptide repeat-containing protein At5g66631 GN=At5g66631 OS=Arabidopsis thaliana (Mouse-ear cress) PE=2 SV=1	hypothetical protein JCGZ_12282 [Jatropha curcas]
	VF20647	3249	28.7515	70.1798	74.5321	57.7291	69.6792	85.7377	Clp protease-related protein At4g12060, chloroplastic (Precursor) GN=At4g12060 OS=Arabidopsis thaliana (Mouse-ear cress) PE=1 SV=1	hypothetical protein JCGZ_20734 [Jatropha curcas]
	VF01714	3247	73.4847	51.5754	51.3758	57.4457	51.474	40.5926	Eukaryotic initiation factor 4A-3 OS=Nicotiana plumbaginifolia (Leadwort-leaved tobacco) PE=2 SV=1	hypothetical protein JCGZ_24208 [Jatropha curcas]
	VF10849	3245	28.1032	47.1167	52.1884	45.0252	51.6809	56.6892	Dual specificity phosphatase Cdc25 GN=F12E4_220 OS=Arabidopsis thaliana (Mouse-ear cress) PE=1 SV=1	hypothetical protein JCGZ_26635 [Jatropha curcas]
	VF24391	3245	92.2703	61.7675	56.6161	67.7298	60.2339	51.0108	40S ribosomal protein S24-2 GN=RPS24B OS=Arabidopsis thaliana (Mouse-ear cress) PE=2 SV=2	hypothetical protein JCGZ_23462 [Jatropha curcas]
	VF15817	3243	1.88327	1.11535	1.06516	1.37994	1.15371	0.802078	Pentatricopeptide repeat-containing protein At1g14470 GN=PCMP-A4 OS=Arabidopsis thaliana (Mouse-ear cress) PE=2 SV=2	PREDICTED: pentatricopeptide repeat-containing protein At3g62890-like [Populus euphratica]
	VF18072	3243	45.8321	34.7464	32.9373	36.5335	33.6218	27.8924	Probable transcription factor PosF21 GN=T28P16.14 OS=Arabidopsis thaliana (Mouse-ear cress) PE=2 SV=1	hypothetical protein JCGZ_20894 [Jatropha curcas]
	VF27174	3243	61.1095	41.2495	40.4532	48.9931	40.4934	34.1676	--	hypothetical protein JCGZ_25980 [Jatropha curcas]
	VFNG2180	3243	125.457	216.148	219.861	182.688	217.746	261.536	ADP-ribosylation factor GN=ARF OS=Vigna unguiculata (Cowpea) PE=2 SV=3	ADP-ribosylation factor [Morus notabilis]
	VF06005	3242	5.31907	2.3889	2.41807	3.58475	2.44096	1.28483	Pentatricopeptide repeat-containing protein At2g26790, mitochondrial (Precursor) GN=At2g26790 OS=Arabidopsis thaliana (Mouse-ear cress) PE=3 SV=1	pentatricopeptide repeat-containing protein, putative [Ricinus communis]
	VF10139	3242	30.0354	20.0523	19.9786	23.016	20.8461	17.4961	--	hypothetical protein JCGZ_10773 [Jatropha curcas]
	VF11042	3242	20.7709	14.1534	12.7286	15.0714	12.8627	9.85207	Protease Do-like 8, chloroplastic (Precursor) GN=DEGP8 OS=Arabidopsis thaliana (Mouse-ear cress) PE=1 SV=1	Protease degQ precursor, putative [Ricinus communis]
	VF27342	3239	31.134	21.7331	20.6844	22.7225	20.235	18.3957	Peptidyl-prolyl cis-trans isomerase CYP59 GN=CYP59 OS=Arabidopsis thaliana (Mouse-ear cress) PE=1 SV=1	hypothetical protein JCGZ_22635 [Jatropha curcas]
	VF08229	3238	6.9168	3.65463	3.46064	3.96163	3.13462	2.2878	Pentatricopeptide repeat-containing protein At5g15280 GN=At5g15280 OS=Arabidopsis thaliana (Mouse-ear cress) PE=2 SV=1	hypothetical protein JCGZ_19865 [Jatropha curcas]
	VF13750	3238	27.3707	18.6819	17.9443	20.7361	16.5413	13.4442	--	hypothetical protein JCGZ_15836 [Jatropha curcas]
	VFNG508	3238	20.7183	15.4703	15.0658	17.366	14.4025	13.1505	Cytochrome P450 71D9 GN=CYP71D9 OS=Glycine max (Soybean) PE=2 SV=1	hypothetical protein JCGZ_01014 [Jatropha curcas]
	VF22570	3237	2.66291	1.16946	1.29973	1.59602	1.27219	0.906531	Pentatricopeptide repeat-containing protein At5g59600 GN=PCMP-E1 OS=Arabidopsis thaliana (Mouse-ear cress) PE=2 SV=1	hypothetical protein JCGZ_02951 [Jatropha curcas]
	VF07269	3235	17.6349	13.5082	12.9204	14.0671	12.569	11.029	--	hypothetical protein JCGZ_21423 [Jatropha curcas]
	VF16649	3233	12.9369	8.40126	7.62886	9.09373	8.08212	6.8924	--	hypothetical protein JCGZ_18781 [Jatropha curcas]
	VF22856	3233	77.309	46.3144	44.9503	53.6585	50.0925	35.8393	--	hypothetical protein JCGZ_20196 [Jatropha curcas]
	VF25163	3233	7.6376	5.15242	5.10203	6.17955	4.96293	4.15996	--	hypothetical protein JCGZ_19893 [Jatropha curcas]
	VF23129	3232	19.8623	33.9595	36.013	32.3458	37.8626	39.7621	--	hypothetical protein JCGZ_06634 [Jatropha curcas]
	VF17451	3230	36.5531	26.4668	25.9997	28.9565	24.6957	23.766	DNA-binding protein RHL1 GN=F11A17.7 OS=Arabidopsis thaliana (Mouse-ear cress) PE=1 SV=1	hypothetical protein JCGZ_17420 [Jatropha curcas]
	VF07935	3229	16.8774	10.7707	10.907	12.5474	11.1605	9.61683	--	hypothetical protein JCGZ_15074 [Jatropha curcas]
	VF02752	3228	59.4962	29.177	31.4314	40.4083	27.9762	22.8221	Putative ALA-interacting subunit 2 GN=ALIS2 OS=Arabidopsis thaliana (Mouse-ear cress) PE=2 SV=1	hypothetical protein JCGZ_04647 [Jatropha curcas]
	VF03933	3228	72.298	132.991	146.918	121.46	133.632	163.065	UPF0136 membrane protein At2g26240 GN=At2g26240 OS=Arabidopsis thaliana (Mouse-ear cress) PE=3 SV=1	hypothetical protein POPTR_0001s44940g [Populus trichocarpa]
	VF25382	3227	11.5398	7.13443	7.20345	8.94554	6.80865	5.00253	--	hypothetical protein JCGZ_15793 [Jatropha curcas]
	VF01884	3225	11.5683	4.98928	5.5756	6.75167	4.92771	3.91822	Uncharacterized CRM domain-containing protein At3g25440, chloroplastic (Precursor) GN=At3g25440 OS=Arabidopsis thaliana (Mouse-ear cress) PE=2 SV=1	hypothetical protein JCGZ_09572 [Jatropha curcas]
	VF07127	3222	109.623	170.399	174.577	147.17	182.933	196.303	Coatomer subunit gamma-2 OS=Oryza sativa subsp. japonica (Rice) PE=2 SV=1	hypothetical protein JCGZ_10084 [Jatropha curcas]
	VF11407	3222	83.6324	55.834	57.889	62.4503	52.9472	42.1299	Poly [ADP-ribose] polymerase 1 GN=PARP1 OS=Arabidopsis thaliana (Mouse-ear cress) PE=1 SV=2	hypothetical protein JCGZ_21801 [Jatropha curcas]
	VF18898	3221	38.3967	24.3936	23.7104	25.8465	22.9228	17.334	Polyadenylate-binding protein 5 GN=PAB5 OS=Arabidopsis thaliana (Mouse-ear cress) PE=1 SV=3	hypothetical protein JCGZ_26766 [Jatropha curcas]
	VF00999	3220	47.4107	26.3924	26.5466	33.9516	22.7014	14.6754	B3 domain-containing protein Os01g0234100 OS=Oryza sativa subsp. japonica (Rice) PE=2 SV=1	hypothetical protein JCGZ_01635 [Jatropha curcas]
	VF17013	3219	51.1879	34.0425	31.3307	38.4187	34.0263	23.5878	--	hypothetical protein JCGZ_21488 [Jatropha curcas]
	VF27521	3219	41.6678	23.9409	21.3918	24.8023	20.607	16.1916	Lysine--tRNA ligase GN=LYSRS OS=Solanum lycopersicum (Tomato) PE=2 SV=1	hypothetical protein JCGZ_16183 [Jatropha curcas]
	VF02260	3218	26.1461	12.5306	13.7428	18.5807	13.8395	8.14873	--	hypothetical protein JCGZ_13059 [Jatropha curcas]
	VF07651	3218	27.5264	19.6002	20.6597	21.5214	20.3393	17.229	--	conserved hypothetical protein [Ricinus communis]
	VF03525	3217	3.31265	1.77299	1.49084	1.89077	1.53212	1.22974	Putative pentatricopeptide repeat-containing protein At1g17630 GN=PCMP-E72 OS=Arabidopsis thaliana (Mouse-ear cress) PE=3 SV=1	hypothetical protein JCGZ_24767 [Jatropha curcas]
	VF08633	3216	96.004	201.731	228.255	175.096	203.088	252.698	(6-4)DNA photolyase GN=UVR3 OS=Arabidopsis thaliana (Mouse-ear cress) PE=1 SV=2	JHL25H03.11 [Jatropha curcas]
	VF10264	3215	80.8343	131.861	139.47	120.815	134.629	146.327	Histone deacetylase complex subunit SAP18 GN=At2g45640 OS=Arabidopsis thaliana (Mouse-ear cress) PE=1 SV=1	hypothetical protein POPTR_0003s11920g [Populus trichocarpa]
	VF26894	3215	9.86759	6.95376	6.41552	8.02433	6.21614	5.34084	Squalene monooxygenase OS=Panax ginseng (Korean ginseng) PE=2 SV=1	Squalene monooxygenase, putative [Ricinus communis]
	VF27097	3214	35.7045	24.7325	23.1403	25.5036	24.1466	20.8685	Pentatricopeptide repeat-containing protein At4g21190 GN=EMB1417 OS=Arabidopsis thaliana (Mouse-ear cress) PE=2 SV=1	hypothetical protein JCGZ_26044 [Jatropha curcas]
	VF28342	3214	49.6084	81.3581	82.5689	70.9457	89.5027	92.1271	Glycine dehydrogenase (decarboxylating), mitochondrial (Precursor) GN=GDCSP OS=Solanum tuberosum (Potato) PE=2 SV=1	hypothetical protein JCGZ_07672 [Jatropha curcas]
	VF06567	3213	55.6513	94.8578	99.3581	83.8235	99.0497	121.67	Thioredoxin Y2, chloroplastic (Precursor) GN=At1g43560 OS=Arabidopsis thaliana (Mouse-ear cress) PE=2 SV=1	hypothetical protein JCGZ_15185 [Jatropha curcas]
	VF21968	3213	13.4656	9.2613	9.87194	10.1042	9.3292	8.27329	--	hypothetical protein JCGZ_25523 [Jatropha curcas]
	VF02818	3212	15.5525	19.7973	19.3056	18.1205	19.1193	20.7068	--	conserved hypothetical protein [Ricinus communis]
	VF12932	3212	14.7378	7.83003	8.25468	10.8801	7.40539	5.74417	ABC transporter C family member 3 GN=MJG19.3 OS=Arabidopsis thaliana (Mouse-ear cress) PE=1 SV=1	PREDICTED: ABC transporter C family member 3-like [Populus euphratica]
	VF10894	3211	41.4001	87.6	93.2464	84.7712	92.4586	112.41	Uncharacterized protein ycf19 GN=ycf19 OS=Guillardia theta (Cryptomonas phi) PE=3 SV=1	hypothetical protein JCGZ_15121 [Jatropha curcas]
	VF17499	3211	10.4168	6.76936	6.39442	8.29382	6.55074	5.18308	Embryogenesis-associated protein EMB8 GN=EMB8 OS=Picea glauca (White spruce) PE=2 SV=1	hypothetical protein JCGZ_20357 [Jatropha curcas]
	VF24629	3211	30.6078	23.3624	22.7867	24.6421	22.6861	18.7487	--	PREDICTED: uncharacterized protein LOC105137499 isoform X3 [Populus euphratica]
	VF26325	3211	12.6415	7.13118	6.89773	9.53569	6.95594	5.14007	--	hypothetical protein JCGZ_11714 [Jatropha curcas]
	VF01636	3209	35.3863	17.5362	17.9124	24.4379	19.1874	9.37796	DNA-directed RNA polymerase 2, chloroplastic/mitochondrial (Precursor) GN=RPOT2 OS=Nicotiana sylvestris (Wood tobacco) PE=2 SV=2	hypothetical protein JCGZ_25615 [Jatropha curcas]
	VF12187	3209	7.69261	3.46906	4.10771	4.6924	3.39898	2.78501	Protein ROOT PRIMORDIUM DEFECTIVE 1 GN=RPD1 OS=Arabidopsis thaliana (Mouse-ear cress) PE=1 SV=1	hypothetical protein JCGZ_00224 [Jatropha curcas]
	VF14404	3208	16.4453	9.54133	9.98505	12.1347	8.12747	6.89143	Pentatricopeptide repeat-containing protein At1g18485 GN=PCMP-H8 OS=Arabidopsis thaliana (Mouse-ear cress) PE=2 SV=2	PREDICTED: pentatricopeptide repeat-containing protein At1g18485-like [Populus euphratica]
	VF14364	3206	62.1361	41.5394	44.2556	50.9561	41.6546	35.1733	--	conserved hypothetical protein [Ricinus communis]
	VF03801	3205	7.65696	3.19343	3.30333	4.16603	2.3704	2.11761	RING-H2 finger protein ATL74 GN=ATL74 OS=Arabidopsis thaliana (Mouse-ear cress) PE=2 SV=1	zinc finger family protein [Populus trichocarpa]
	VF16162	3205	23.5939	15.6038	17.4592	18.676	16.1691	14.0898	Vacuolar-processing enzyme alpha-isozyme (Precursor) GN=At2g25940 OS=Arabidopsis thaliana (Mouse-ear cress) PE=2 SV=2	hypothetical protein JCGZ_23527 [Jatropha curcas]
	VF17369	3205	16.1772	10.2082	10.1413	11.975	11.1637	7.77624	Pentatricopeptide repeat-containing protein At1g74900, mitochondrial (Precursor) GN=OTP43 OS=Arabidopsis thaliana (Mouse-ear cress) PE=2 SV=1	pentatricopeptide repeat-containing protein, putative [Ricinus communis]
	VF28360	3205	129.876	191.742	206.096	177.451	203.363	238.805	NADH dehydrogenase [ubiquinone] iron-sulfur protein 7, mitochondrial (Precursor) OS=Brassica oleracea (Wild cabbage) PE=2 SV=1	hypothetical protein JCGZ_07686 [Jatropha curcas]
	VF09070	3204	8.24592	5.22506	4.69855	6.40204	4.88038	3.8427	Serine acetyltransferase 4 GN=SAT4 OS=Arabidopsis thaliana (Mouse-ear cress) PE=1 SV=1	hypothetical protein JCGZ_22375 [Jatropha curcas]
	VF10954	3204	61.9143	43.0174	42.934	51.3283	43.4518	36.9849	--	hypothetical protein JCGZ_01877 [Jatropha curcas]
	VF17129	3203	218.569	118.6	128.695	142.614	113.179	101.62	--	hypothetical protein JCGZ_19963 [Jatropha curcas]
	VFNG1494	3199	153.62	85.2153	86.2956	95.8291	85.3106	72.7424	Zinc finger CCCH domain-containing protein 22 OS=Oryza sativa subsp. japonica (Rice) PE=2 SV=2	PREDICTED: zinc finger CCCH domain-containing protein 53-like isoform X1 [Populus euphratica]
	VF03190	3198	5.39272	3.75719	3.48624	3.86399	3.48153	2.71438	Pentatricopeptide repeat-containing protein At2g35030, mitochondrial (Precursor) GN=PCMP-E15 OS=Arabidopsis thaliana (Mouse-ear cress) PE=2 SV=1	pentatricopeptide repeat-containing protein, putative [Ricinus communis]
	VF16052	3198	295.386	619.079	638.435	479.811	623.295	731.86	Acyl carrier protein 1, chloroplastic (Precursor) GN=ACP1 OS=Casuarina glauca (Swamp oak) PE=2 SV=1	hypothetical protein JCGZ_23428 [Jatropha curcas]
	VF17325	3198	227.511	126.206	121.649	172.982	120.498	83.4591	--	hypothetical protein JCGZ_16583 [Jatropha curcas]
	VF24424	3197	16.0783	8.1621	6.97905	10.8988	8.76745	4.73258	--	N-acetyltransferase, putative [Ricinus communis]
	VF27204	3197	3.42519	1.86599	2.13125	2.57338	1.91583	1.47291	Glucan endo-1,3-beta-glucosidase {ECO:0000250|UniProtKB:Q03467} (Precursor) GN=VIT_06s0061g00120 OS=Vitis vinifera (Grape) PE=1 SV=2	hypothetical protein JCGZ_25953 [Jatropha curcas]
	VF07415	3195	87.2682	60.279	63.0968	70.0803	65.0117	55.5131	--	hypothetical protein JCGZ_05126 [Jatropha curcas]
	VF13743	3195	6.20392	4.71439	4.83577	4.92416	4.72922	4.21666	--	hypothetical protein JCGZ_05385 [Jatropha curcas]
	VF20717	3194	61.6117	45.6383	42.7227	49.5532	39.7427	33.8752	E3 ubiquitin-protein ligase COP1 GN=COP1 OS=Arabidopsis thaliana (Mouse-ear cress) PE=1 SV=2	hypothetical protein JCGZ_12734 [Jatropha curcas]
	VF23453	3193	27.7186	17.5911	17.729	19.6867	14.6813	13.1908	Leucine-rich repeat-containing protein ODA7 GN=ODA7 OS=Chlamydomonas reinhardtii (Chlamydomonas smithii) PE=1 SV=1	hypothetical protein JCGZ_20207 [Jatropha curcas]
	VF16350	3192	52.4525	74.2521	78.8938	66.4088	80.7814	88.3075	Gamma carbonic anhydrase 1, mitochondrial (Precursor) OS=Arabidopsis thaliana (Mouse-ear cress) PE=1 SV=1	Protein yrdA, putative [Ricinus communis]
	VF02736	3191	45.1926	71.2035	75.4032	65.2916	71.4714	78.3303	--	hypothetical protein JCGZ_04638 [Jatropha curcas]
	VF18190	3191	39.1506	30.2464	28.3135	33.0184	30.4926	26.5014	Vacuolar cation/proton exchanger 1b GN=OSJNBa0030I14.3 OS=Oryza sativa subsp. japonica (Rice) PE=2 SV=1	Vacuolar cation/proton exchanger 1a, putative [Ricinus communis]
	VF26627	3191	39.0728	25.9417	24.73	28.5291	21.7583	16.9658	#N/A	#N/A
	VF23068	3189	133.334	212.035	236.518	211.811	227.98	256.112	Thioredoxin H2 GN=TRX2 OS=Arabidopsis thaliana (Mouse-ear cress) PE=2 SV=2	Thioredoxin H-type, putative [Ricinus communis]
	VF17200	3187	143.3	68.5855	49.7324	81.5076	52.671	8.87167	LRR receptor-like serine/threonine-protein kinase ERL2 (Precursor) GN=ERL2 OS=Arabidopsis thaliana (Mouse-ear cress) PE=2 SV=1	hypothetical protein JCGZ_26207 [Jatropha curcas]
	VF00661	3186	6.48262	3.96599	3.75004	4.85897	4.28242	3.11537	Mitogen-activated protein kinase kinase kinase 2 GN=ANP2 OS=Arabidopsis thaliana (Mouse-ear cress) PE=2 SV=1	Mitogen-activated protein kinase kinase kinase, putative [Ricinus communis]
	VF02117	3186	17.549	12.4254	12.1936	14.4719	12.9712	9.97909	tRNA (guanine(37)-N1)-methyltransferase 1 {ECO:0000255|HAMAP-Rule:MF_03152} GN=VIT_19s0014g03930 OS=Vitis vinifera (Grape) PE=3 SV=1	conserved hypothetical protein [Ricinus communis]
	VF00407	3184	118.525	75.3639	75.6335	94.1355	78.5412	64.6496	--	hypothetical protein JCGZ_22878 [Jatropha curcas]
	VF07218	3184	12.3885	5.92543	6.41957	8.59431	6.5412	4.79194	--	hypothetical protein POPTR_0017s04420g [Populus trichocarpa]
	VF14432	3184	4.51164	2.13734	1.34886	2.59046	1.58825	1.12359	F-box/kelch-repeat protein At3g06240 GN=At3g06240 OS=Arabidopsis thaliana (Mouse-ear cress) PE=2 SV=1	hypothetical protein JCGZ_00678 [Jatropha curcas]
	VF01556	3183	84.8797	196.612	191.317	169.416	174.229	228.573	NADH dehydrogenase [ubiquinone] iron-sulfur protein 5-B GN=At3g62790 OS=Arabidopsis thaliana (Mouse-ear cress) PE=3 SV=1	NADH-ubiquinone oxidoreductase-related [Theobroma cacao]
	VF03973	3183	7.07899	10.1573	10.1818	9.67802	9.70228	11.1519	ATP synthase gamma chain, chloroplastic (Precursor) GN=ATPC OS=Nicotiana tabacum (Common tobacco) PE=1 SV=1	hypothetical protein JCGZ_00896 [Jatropha curcas]
	VF11181	3183	24.4723	17.0569	17.2029	18.0366	16.1158	13.2321	--	poly(A) polymerase, putative [Ricinus communis]
	VF09534	3182	7.43376	3.88165	4.11565	5.51305	3.41074	2.41866	--	hypothetical protein JCGZ_20957 [Jatropha curcas]
	VF17797	3182	41.3093	26.2189	28.9473	30.8273	26.619	24.216	F-box/FBD/LRR-repeat protein At1g13570 GN=At1g13570 OS=Arabidopsis thaliana (Mouse-ear cress) PE=2 SV=1	hypothetical protein JCGZ_04378 [Jatropha curcas]
	VF19580	3181	19.4064	8.40929	10.3775	11.1093	7.31155	5.09246	Putative pentatricopeptide repeat-containing protein At1g12700, mitochondrial (Precursor) GN=At1g12700 OS=Arabidopsis thaliana (Mouse-ear cress) PE=3 SV=1	hypothetical protein POPTR_0005s24150g [Populus trichocarpa]
	VF25055	3180	161.679	639.225	569.818	474.838	633.457	690.821	TITAN-like protein GN=TTL OS=Arabidopsis thaliana (Mouse-ear cress) PE=2 SV=1	PREDICTED: TITAN-like protein isoform X1 [Populus euphratica]
	VF08128	3179	33.869	23.1801	20.4529	26.991	19.7257	15.6535	30S ribosomal protein S1, chloroplastic (Precursor) GN=RPS1 OS=Spinacia oleracea (Spinach) PE=1 SV=1	conserved hypothetical protein [Ricinus communis]
	VF11842	3178	10.2373	5.94681	6.25104	7.27425	4.83605	4.18072	Probable WRKY transcription factor 32 GN=WRKY32 OS=Arabidopsis thaliana (Mouse-ear cress) PE=2 SV=1	WRKY transcription factor 03 [Jatropha curcas]
	VF13050	3177	19.0841	11.7282	11.4185	14.192	12.1415	10.3225	--	hypothetical protein JCGZ_02497 [Jatropha curcas]
	VF00470	3176	15.4306	11.7114	10.7187	12.0857	10.9955	8.67528	Pentatricopeptide repeat-containing protein At5g67570, chloroplastic (Precursor) GN=K9I9.14 OS=Arabidopsis thaliana (Mouse-ear cress) PE=1 SV=2	hypothetical protein JCGZ_12543 [Jatropha curcas]
	VF16311	3175	8.91043	25.201	29.1648	23.1343	24.3183	32.3462	Superoxide dismutase [Cu-Zn] 2 GN=SODCC.2 OS=Mesembryanthemum crystallinum (Common ice plant) PE=2 SV=1	cytosolic copper/zinc superoxide dismutase [Hevea brasiliensis]
	VF26883	3175	40.0521	31.2573	31.8488	34.833	29.6487	26.6935	--	hypothetical protein JCGZ_03180 [Jatropha curcas]
	VF13884	3174	29.4845	23.4873	21.0898	23.8758	21.2309	18.5325	--	hypothetical protein JCGZ_07558 [Jatropha curcas]
	VF07052	3173	1193.12	853.424	819.835	864.142	826.326	742.195	60S ribosomal protein L9 OS=Oryza sativa subsp. japonica (Rice) PE=2 SV=3	60S ribosomal protein L9, putative [Ricinus communis]
	VF22928	3173	0.737621	6.39128	7.48855	5.12793	5.90609	8.2208	F-box protein At5g49610 GN=At5g49610 OS=Arabidopsis thaliana (Mouse-ear cress) PE=1 SV=1	hypothetical protein JCGZ_05162 [Jatropha curcas]
	VF24161	3173	51.8182	69.4511	68.1691	64.3703	69.724	71.252	Serine/threonine-protein phosphatase PP1 GN=PP1 OS=Medicago sativa subsp. varia (Alfalfa) PE=2 SV=1	hypothetical protein JCGZ_20530 [Jatropha curcas]
	VF14040	3172	11.1167	4.54083	4.3855	5.56815	4.45875	3.43248	DNA topoisomerase 6 subunit B {ECO:0000255|HAMAP-Rule:MF_03165} GN=MOE17.8 OS=Arabidopsis thaliana (Mouse-ear cress) PE=1 SV=1	Type II DNA topoisomerase VI subunit B, putative [Ricinus communis]
	VF24239	3171	30.0605	18.4811	16.8338	21.1134	15.5013	15.2125	--	PREDICTED: uncharacterized protein LOC104211613 [Nicotiana sylvestris]
	VF12644	3170	47.121	25.9771	23.2888	27.7062	19.3723	11.8298	Shugoshin-1 GN=SGO1 OS=Zea mays (Maize) PE=2 SV=1	Shugoshin-1, putative [Ricinus communis]
	VF19613	3169	103.888	62.4013	58.4839	81.8877	59.8541	44.7508	#N/A	#N/A
	VF09358	3168	12.1363	8.0813	6.91596	9.30817	7.28695	4.68687	FIP1[V]-like protein {ECO:0000303|PubMed:16282318} OS=Arabidopsis thaliana (Mouse-ear cress) PE=1 SV=1	conserved hypothetical protein [Ricinus communis]
	VF01770	3165	173.648	131.504	135.212	140.904	138.286	115.091	Probable 26S proteasome non-ATPase regulatory subunit 3 GN=21D7 OS=Nicotiana tabacum (Common tobacco) PE=2 SV=1	hypothetical protein JCGZ_18844 [Jatropha curcas]
	VF02024	3165	41.1335	29.0427	30.6744	34.2867	31.0873	27.1097	Probable ADP-ribosylation factor GTPase-activating protein AGD14 GN=At1g08680/At1g08690 OS=Arabidopsis thaliana (Mouse-ear cress) PE=1 SV=2	hypothetical protein JCGZ_13231 [Jatropha curcas]
	VF13928	3165	9.32397	5.13054	5.33536	6.57821	4.71058	4.48737	Pentatricopeptide repeat-containing protein At5g03800 OS=Arabidopsis thaliana (Mouse-ear cress) PE=2 SV=1	hypothetical protein JCGZ_16618 [Jatropha curcas]
	VF16908	3165	280.964	367.007	373.684	339.104	373.703	383.301	Proteasome subunit alpha type-7 GN=PAD1 OS=Cicer arietinum (Chickpea) PE=2 SV=1	proteasome subunit alpha type, putative [Ricinus communis]
	VF23876	3165	8.76101	4.86579	4.16063	6.48735	4.60749	2.37186	Ninja-family protein 2 GN=AFP-B1 OS=Triticum aestivum (Wheat) PE=3 SV=1	hypothetical protein JCGZ_15720 [Jatropha curcas]
	VF20004	3164	27.4702	10.0634	6.00459	16.7734	4.79353	1.29393	O-acyltransferase WSD1 GN=WSD1 OS=Arabidopsis thaliana (Mouse-ear cress) PE=2 SV=1	hypothetical protein JCGZ_17206 [Jatropha curcas]
	VF04257	3163	96.9104	154.25	147.036	131.995	149.135	180.663	Peptidyl-prolyl cis-trans isomerase Pin1 GN=PIN1 OS=Malus domestica (Apple) PE=2 SV=1	hypothetical protein JCGZ_06507 [Jatropha curcas]
	VF21354	3163	54.3414	33.8729	39.0257	39.5802	35.1053	29.5183	Mitogen-activated protein kinase 16 GN=MPK16 OS=Arabidopsis thaliana (Mouse-ear cress) PE=2 SV=2	hypothetical protein JCGZ_02086 [Jatropha curcas]
	VF26522	3163	45.9033	122.706	135.627	90.6516	149.126	163.796	NADH dehydrogenase [ubiquinone] 1 beta subcomplex subunit 10-B GN=At3g18410 OS=Arabidopsis thaliana (Mouse-ear cress) PE=2 SV=1	PREDICTED: NADH dehydrogenase [ubiquinone] 1 beta subcomplex subunit 10-B-like [Populus euphratica]
	VF10692	3161	41.2169	78.9055	88.2013	65.465	77.9052	100.594	Argininosuccinate synthase, chloroplastic (Precursor) GN=At4g24830 OS=Arabidopsis thaliana (Mouse-ear cress) PE=2 SV=3	hypothetical protein JCGZ_03235 [Jatropha curcas]
	VF25866	3161	31.3828	49.5299	49.4753	47.0097	51.3736	60.4899	Reticulon-like protein B11 GN=RTNLB11 OS=Arabidopsis thaliana (Mouse-ear cress) PE=2 SV=1	hypothetical protein JCGZ_15459 [Jatropha curcas]
	VF01561	3160	94.7981	68.9627	67.9641	71.9769	63.9795	52.361	Peter Pan-like protein GN=PPAN OS=Arabidopsis thaliana (Mouse-ear cress) PE=1 SV=1	hypothetical protein JCGZ_13933 [Jatropha curcas]
	VF00513	3159	628.894	1307.1	1470.53	1032.21	1451.15	1664.08	Uncharacterized protein At2g23090 GN=At2g23090 OS=Arabidopsis thaliana (Mouse-ear cress) PE=1 SV=1	hypothetical protein CICLE_v10026876mg [Citrus clementina]
	VF24127	3159	26.3615	35.2888	35.3279	33.0127	38.4057	40.3741	BTB/POZ domain-containing protein POB1 GN=POB1 OS=Arabidopsis thaliana (Mouse-ear cress) PE=2 SV=2	hypothetical protein JCGZ_20504 [Jatropha curcas]
	VFNG1622	3159	3.62734	1.92967	1.20088	2.41209	1.60803	0.812767	#N/A	#N/A
	VFNG5556	3159	6.0097	3.15661	2.76125	3.38555	3.03695	2.41393	Endonuclease OS=Nicotiana tabacum (Common tobacco) PE=2 SV=1	PREDICTED: uncharacterized protein LOC104894400 [Beta vulgaris subsp. vulgaris]
	VF26088	3158	3.86983	0.88338	1.15743	2.02273	1.42804	0.478335	Syntaxin-112 GN=SYP112 OS=Arabidopsis thaliana (Mouse-ear cress) PE=2 SV=2	syntaxin, putative [Ricinus communis]
	VF21967	3156	4.10525	2.93863	2.67422	3.17293	2.54432	1.91233	--	hypothetical protein JCGZ_25524 [Jatropha curcas]
	VF15490	3154	110.55	76.1517	84.6211	91.9485	77.6154	68.2978	--	hypothetical protein JCGZ_07352 [Jatropha curcas]
	VF23399	3153	22.7751	15.1998	15.0801	18.5782	16.1771	13.3888	GTP-binding protein ERG GN=ERG OS=Antirrhinum majus (Garden snapdragon) PE=2 SV=1	hypothetical protein JCGZ_14863 [Jatropha curcas]
	VF27242	3153	16.7997	12.2522	12.5137	13.1086	11.0972	9.92693	--	hypothetical protein JCGZ_25918 [Jatropha curcas]
	VFNG2563	3153	4.70641	2.70946	2.59379	2.91071	2.78855	2.24429	Alanine--glyoxylate aminotransferase 2 homolog 1, mitochondrial (Precursor) GN=AGT2 OS=Arabidopsis thaliana (Mouse-ear cress) PE=2 SV=1	PREDICTED: uncharacterized protein LOC101512666 [Cicer arietinum]
	VF00945	3151	45.0045	21.4021	21.7644	28.6972	22.7351	18.9671	Chaperonin 60 subunit alpha 2, chloroplastic (Precursor) GN=At5g18820 OS=Arabidopsis thaliana (Mouse-ear cress) PE=2 SV=1	rubisco subunit binding-protein alpha subunit, ruba, putative [Ricinus communis]
	VFNG4993	3151	2.62555	3.89237	3.73774	3.46562	3.57158	4.21671	Ras-related protein Rab2BV GN=RAB2BV OS=Beta vulgaris (Sugar beet) PE=2 SV=1	TPA: hypothetical protein ZEAMMB73_597734 [Zea mays]
	VF19590	3150	9.95336	3.87861	4.03997	6.25364	4.16542	3.06203	GABA transporter 1 GN=T23G18.9 OS=Arabidopsis thaliana (Mouse-ear cress) PE=1 SV=1	hypothetical protein JCGZ_21827 [Jatropha curcas]
	VF25979	3150	154.703	88.0351	103.829	114.906	85.9027	65.1108	#N/A	#N/A
	VFNG2180	3149	125.457	216.148	219.861	182.688	217.746	261.536	ADP-ribosylation factor GN=ARF OS=Vigna unguiculata (Cowpea) PE=2 SV=3	ADP-ribosylation factor [Morus notabilis]
	VF21412	3149	250.326	183.317	159.924	183.431	162.506	151.848	60S ribosomal protein L7-2 GN=RPL7B OS=Arabidopsis thaliana (Mouse-ear cress) PE=2 SV=1	hypothetical protein JCGZ_08960 [Jatropha curcas]
	VF25699	3148	157.332	260.383	254.62	246.311	277.365	284.102	--	hypothetical protein JCGZ_06279 [Jatropha curcas]
	VFNG1639	3148	12.4778	7.65004	7.22342	8.36659	6.80278	6.69059	F-box protein At2g27310 GN=At2g27310 OS=Arabidopsis thaliana (Mouse-ear cress) PE=2 SV=1	hypothetical protein JCGZ_21947 [Jatropha curcas]
	VF05083	3146	13.894	23.1102	23.2792	18.5225	22.2717	26.0752	--	hypothetical protein JCGZ_11431 [Jatropha curcas]
	VF06995	3146	176.948	110.926	92.3415	126.478	97.4474	90.3105	Protein LHCP TRANSLOCATION DEFECT (Precursor) GN=F8A12.12 OS=Arabidopsis thaliana (Mouse-ear cress) PE=1 SV=1	hypothetical protein JCGZ_00846 [Jatropha curcas]
	VF07472	3146	77.4972	57.7038	53.5037	62.1385	55.0417	40.8395	Zinc finger CCCH domain-containing protein 42 GN=At3g47120 OS=Arabidopsis thaliana (Mouse-ear cress) PE=2 SV=1	hypothetical protein JCGZ_01522 [Jatropha curcas]
	VF20320	3146	32.0204	48.1538	49.2763	40.8228	51.6431	58.7817	--	synbindin, putative [Ricinus communis]
	VF25345	3146	29.7706	20.1834	21.733	22.5232	20.2528	19.2322	--	hypothetical protein JCGZ_10258 [Jatropha curcas]
	VF27443	3146	45.251	35.4021	34.4407	37.6481	37.338	31.7177	B3 domain-containing transcription factor VRN1 GN=VRN1 OS=Arabidopsis thaliana (Mouse-ear cress) PE=1 SV=1	hypothetical protein JCGZ_10017 [Jatropha curcas]
	VF27539	3146	36.0781	22.5053	23.8537	27.0526	20.0692	14.6588	LysM domain receptor-like kinase 3 (Precursor) GN=LYK3 OS=Arabidopsis thaliana (Mouse-ear cress) PE=2 SV=1	hypothetical protein JCGZ_24855 [Jatropha curcas]
	VF06457	3144	13.2413	6.02625	7.35215	9.15428	5.65466	4.91068	Factor of DNA methylation 1 {ECO:0000303|PubMed:22302148} OS=Arabidopsis thaliana (Mouse-ear cress) PE=1 SV=1	XH/XS domain-containing protein, putative [Theobroma cacao]
	VF03145	3143	14.8515	1.99139	5.20375	7.29261	2.08736	0	#N/A	#N/A
	VF14429	3143	8.49828	3.74669	4.42948	5.67835	4.75355	3.2086	F-box protein At3g07870 GN=At3g07870 OS=Arabidopsis thaliana (Mouse-ear cress) PE=2 SV=1	hypothetical protein JCGZ_00675 [Jatropha curcas]
	VF10719	3142	13.1648	23.8952	26.0195	18.9531	24.2722	29.5061	Transcription factor RF2b GN=RF2b OS=Oryza sativa subsp. japonica (Rice) PE=1 SV=1	hypothetical protein JCGZ_17296 [Jatropha curcas]
	VF14560	3142	3.22611	0.990075	0.566874	1.83881	1.02265	0.262956	Probable S-adenosylmethionine-dependent methyltransferase At5g37990 GN=At5g37990 OS=Arabidopsis thaliana (Mouse-ear cress) PE=3 SV=2	PREDICTED: probable S-adenosylmethionine-dependent methyltransferase At5g37990 [Populus euphratica]
	VF15944	3142	21.3073	16.6951	17.0883	17.3122	17.2327	15.4007	#N/A	#N/A
	VF17290	3141	109.544	67.1711	69.6313	70.8873	62.002	51.232	Nuclear pore complex protein NUP93A {ECO:0000303|PubMed:21189294} OS=Arabidopsis thaliana (Mouse-ear cress) PE=1 SV=2	hypothetical protein JCGZ_27006 [Jatropha curcas]
	VF18047	3141	16.2663	11.3335	11.1319	12.0474	11.7346	8.48765	--	hypothetical protein JCGZ_17274 [Jatropha curcas]
	VF24388	3141	96.223	51.9172	47.8642	70.4319	48.6368	20.8492	Serine/threonine-protein kinase WNK1 GN=WNK1 OS=Arabidopsis thaliana (Mouse-ear cress) PE=1 SV=1	hypothetical protein JCGZ_02166 [Jatropha curcas]
	VFNG5846	3140	40.057	30.3391	26.3929	33.6424	27.1757	24.2175	#N/A	#N/A
	VFNG728	3138	14.5523	4.93858	5.95878	9.393	5.4156	3.56685	--	hypothetical protein JCGZ_02575 [Jatropha curcas]
	VF18276	3137	24.152	15.9542	15.4546	19.6841	16.4638	13.959	--	hypothetical protein JCGZ_21772 [Jatropha curcas]
	VF22943	3137	59.0235	27.7589	21.8747	26.9353	24.1658	14.9993	H/ACA ribonucleoprotein complex subunit 4 GN=F24I3.230 OS=Arabidopsis thaliana (Mouse-ear cress) PE=1 SV=1	hypothetical protein JCGZ_13359 [Jatropha curcas]
	VF07478	3136	13.381	8.76894	8.64891	10.859	7.44535	6.32342	ABC transporter C family member 3 GN=MJG19.3 OS=Arabidopsis thaliana (Mouse-ear cress) PE=1 SV=1	multidrug resistance-associated protein 2, 6 (mrp2, 6), abc-transoprter, putative [Ricinus communis]
	VF01878	3135	6.03835	1.85073	2.25437	3.13961	1.31636	1.30944	--	PREDICTED: MORC family CW-type zinc finger protein 3-like isoform X1 [Vitis vinifera]
	VF02068	3135	16.0644	31.7025	32.4719	25.191	36.2991	37.2299	--	conserved hypothetical protein [Ricinus communis]
	VF10913	3135	179.044	286.749	330.094	282.302	339.307	383.224	--	hypothetical protein JCGZ_15101 [Jatropha curcas]
	VF24974	3135	25.5235	15.0555	14.7651	17.7976	16.6522	13.4963	Lysine-specific demethylase REF6 GN=T29H11_50 OS=Arabidopsis thaliana (Mouse-ear cress) PE=1 SV=1	hypothetical protein JCGZ_11361 [Jatropha curcas]
	VF18193	3134	40.6566	27.8957	29.7279	32.8372	30.5873	22.9668	DNA mismatch repair protein MSH6 GN=T10M13.8 OS=Arabidopsis thaliana (Mouse-ear cress) PE=1 SV=2	hypothetical protein JCGZ_08956 [Jatropha curcas]
	VF09607	3133	4.32526	1.98654	2.1485	2.59031	1.32441	1.36091	#N/A	#N/A
	VF00050	3132	4.26197	1.68754	1.57337	2.09218	1.6421	1.31964	Putative disease resistance protein RGA4 GN=RGA4 OS=Solanum bulbocastanum (Wild potato) PE=2 SV=1	hypothetical protein JCGZ_02621 [Jatropha curcas]
	VF06206	3132	14.2419	8.88003	6.4379	9.3105	6.46364	3.63387	Probable WRKY transcription factor 41 GN=WRKY41 OS=Arabidopsis thaliana (Mouse-ear cress) PE=2 SV=2	WRKY transcription factor 51.1 [Jatropha curcas]
	VF23732	3132	51.9395	35.6986	38.5183	43.0184	35.2765	33.5993	Serine/threonine protein phosphatase 2A 59 kDa regulatory subunit B&apos; zeta isoform GN=B&apos;ZETA OS=Arabidopsis thaliana (Mouse-ear cress) PE=2 SV=2	hypothetical protein JCGZ_13734 [Jatropha curcas]
	VF07762	3131	74.3354	46.9824	47.7862	57.687	38.2788	35.823	Pre-mRNA-splicing factor SPF27 homolog GN=MRC8.16 OS=Arabidopsis thaliana (Mouse-ear cress) PE=1 SV=1	hypothetical protein JCGZ_05347 [Jatropha curcas]
	VF10571	3131	11.3685	27.544	32.5285	25.0875	26.9827	33.7157	--	hypothetical protein JCGZ_18459 [Jatropha curcas]
	VF09283	3130	44.3034	33.6199	32.4174	36.4997	28.9171	25.7198	--	hypothetical protein JCGZ_18935 [Jatropha curcas]
	VF15161	3130	49.6098	34.0925	34.1414	38.2073	30.2457	31.076	Solanesyl diphosphate synthase 3, chloroplastic/mitochondrial (Precursor) GN=T31E10.3 OS=Arabidopsis thaliana (Mouse-ear cress) PE=1 SV=1	geranylgeranyl pyrophosphate synthase, putative [Ricinus communis]
	VF05903	3129	21.1444	69.7832	82.7668	60.4958	71.7235	84.2861	#N/A	#N/A
	VF07818	3129	37.9188	26.5302	28.1859	32.0556	26.0745	24.5107	--	hypothetical protein JCGZ_13354 [Jatropha curcas]
	VF22443	3129	15.7388	10.3733	9.94991	11.0682	9.36069	6.32484	Pentatricopeptide repeat-containing protein At4g21705, mitochondrial (Precursor) GN=At4g21705 OS=Arabidopsis thaliana (Mouse-ear cress) PE=2 SV=1	pentatricopeptide repeat-containing protein, putative [Ricinus communis]
	VF19304	3128	34.0558	79.563	85.4957	57.3418	77.5674	100.004	Serine/threonine-protein phosphatase PP2A-3 catalytic subunit GN=F14P22.90 OS=Arabidopsis thaliana (Mouse-ear cress) PE=2 SV=1	hypothetical protein JCGZ_03038 [Jatropha curcas]
	VFNG4418	3127	2.19387	0.919541	0.913983	1.03235	0.743799	0.645424	Putative disease resistance RPP13-like protein 1 GN=RPPL1 OS=Arabidopsis thaliana (Mouse-ear cress) PE=3 SV=1	hypothetical protein POPTR_0004s20690g [Populus trichocarpa]
	VF24601	3126	28.6352	17.8471	19.7967	22.7598	16.6768	15.3726	Probable thimet oligopeptidase GN=At1g67690 OS=Arabidopsis thaliana (Mouse-ear cress) PE=3 SV=1	hypothetical protein JCGZ_17905 [Jatropha curcas]
	VF27785	3126	14.3958	7.30892	5.85712	9.67429	6.52502	5.51176	Putative pentatricopeptide repeat-containing protein At3g23330 GN=PCMP-H32 OS=Arabidopsis thaliana (Mouse-ear cress) PE=3 SV=1	pentatricopeptide repeat-containing protein, putative [Ricinus communis]
	VFNG2969	3126	16.1817	9.97633	8.12342	9.88584	8.62033	4.9553	Protein FAR1-RELATED SEQUENCE 5 GN=FRS5 OS=Arabidopsis thaliana (Mouse-ear cress) PE=2 SV=1	hypothetical protein POPTR_0149s00230g [Populus trichocarpa]
	VF26275	3125	29.4943	19.0725	16.4343	23.1921	19.1335	12.3716	Hsp70-Hsp90 organizing protein 3 GN=HOP3 OS=Arabidopsis thaliana (Mouse-ear cress) PE=2 SV=1	hypothetical protein JCGZ_11665 [Jatropha curcas]
	VF05953	3124	3.87601	12.9248	11.8708	8.6112	12.0875	17.1527	Proteasome subunit alpha type-4 GN=PAC1 OS=Spinacia oleracea (Spinach) PE=2 SV=1	20S proteasome alpha subunit C1 isoform 1 [Theobroma cacao]
	VF24812	3124	42.1604	20.6875	20.2596	25.6739	20.4753	18.4767	RNA polymerase sigma factor sigC (Precursor) GN=F5K20.220 OS=Arabidopsis thaliana (Mouse-ear cress) PE=2 SV=1	hypothetical protein JCGZ_07709 [Jatropha curcas]
	VF07875	3123	26.7971	16.6231	17.3059	22.0534	18.0479	14.0772	--	hypothetical protein JCGZ_23911 [Jatropha curcas]
	VF18445	3123	1515.7	517.999	219.16	704.921	366.721	213.881	#N/A	#N/A
	VF07358	3120	23.6435	18.0232	15.6005	17.9418	16.877	15.139	Asparagine--tRNA ligase, chloroplastic/mitochondrial (Precursor) GN=dl4685w OS=Arabidopsis thaliana (Mouse-ear cress) PE=2 SV=3	hypothetical protein JCGZ_03404 [Jatropha curcas]
	VF04320	3119	12.6558	25.8054	27.2299	18.8692	28.7002	32.4327	D-aminoacyl-tRNA deacylase GN=GEK1 OS=Arabidopsis thaliana (Mouse-ear cress) PE=1 SV=2	hypothetical protein JCGZ_05805 [Jatropha curcas]
	VF10019	3119	14.2467	7.71367	4.92952	8.36061	7.2953	4.42529	Vestitone reductase OS=Medicago sativa (Alfalfa) PE=1 SV=1	hypothetical protein JCGZ_14526 [Jatropha curcas]
	VF22493	3119	75.8655	48.6544	44.9771	61.5559	50.6022	35.0723	Guanine nucleotide-binding protein-like NSN1 {ECO:0000305} OS=Arabidopsis thaliana (Mouse-ear cress) PE=2 SV=1	hypothetical protein JCGZ_17559 [Jatropha curcas]
	VF27350	3119	55.5517	38.2482	34.3691	44.7752	39.7979	28.0163	--	hypothetical protein JCGZ_22625 [Jatropha curcas]
	VF05830	3118	12.3996	5.77792	6.34539	7.38405	7.32744	4.80815	--	hypothetical protein JCGZ_23835 [Jatropha curcas]
	VF10090	3118	10.4474	6.20166	6.39735	6.94907	4.93214	3.87589	--	hypothetical protein JCGZ_14466 [Jatropha curcas]
	VF11493	3118	32.6074	52.7141	57.4321	51.8797	51.2855	62.4142	Tobamovirus multiplication protein 3 GN=TOM3 OS=Arabidopsis thaliana (Mouse-ear cress) PE=1 SV=2	hypothetical protein JCGZ_19305 [Jatropha curcas]
	VF16504	3118	16.1973	8.96377	8.26081	12.7275	7.89715	4.82806	--	Queuine tRNA-ribosyltransferase [Theobroma cacao]
	VF25067	3118	84.0941	38.3622	40.819	46.3545	24.8233	13.7668	Squamosa promoter-binding-like protein 13B GN=MFB16.6 OS=Arabidopsis thaliana (Mouse-ear cress) PE=3 SV=1	Squamosa promoter-binding protein, putative [Ricinus communis]
	VF05073	3116	18.3718	26.7747	27.3877	26.2324	29.7968	31.0589	Histone deacetylase 6 GN=MDC12.7 OS=Arabidopsis thaliana (Mouse-ear cress) PE=1 SV=1	hypothetical protein JCGZ_11420 [Jatropha curcas]
	VF05309	3116	9.35855	5.03243	4.07336	5.84436	4.4589	4.07523	Probable arabinosyltransferase ARAD1 GN=ARAD1 OS=Arabidopsis thaliana (Mouse-ear cress) PE=1 SV=1	hypothetical protein JCGZ_11628 [Jatropha curcas]
	VF09346	3116	33.3851	20.2827	18.088	19.7396	17.6571	14.8869	--	hypothetical protein JCGZ_19006 [Jatropha curcas]
	VF01519	3115	5.67935	3.56369	3.35087	4.69954	3.11705	2.45238	Pentatricopeptide repeat-containing protein At2g33760 GN=PCMP-H6 OS=Arabidopsis thaliana (Mouse-ear cress) PE=3 SV=1	hypothetical protein JCGZ_13896 [Jatropha curcas]
	VF02592	3115	21.5245	12.0029	11.5592	15.6215	14.2498	9.67029	--	conserved hypothetical protein [Ricinus communis]
	VF13388	3115	12.2147	8.87983	7.37769	8.68936	8.1917	6.34914	Pentatricopeptide repeat-containing protein At1g62350 GN=At1g62350 OS=Arabidopsis thaliana (Mouse-ear cress) PE=2 SV=1	PREDICTED: pentatricopeptide repeat-containing protein At1g62350 isoform X1 [Eucalyptus grandis]
	VF17368	3115	26.5002	42.3768	41.3139	33.8883	44.6464	47.7562	Threonine dehydratase biosynthetic, chloroplastic (Precursor) GN=OMR1 OS=Arabidopsis thaliana (Mouse-ear cress) PE=1 SV=1	hypothetical protein JCGZ_16612 [Jatropha curcas]
	VF04124	3114	238.371	107.819	115.563	145.814	70.7315	77.3794	Ninja-family protein AFP1 OS=Arabidopsis thaliana (Mouse-ear cress) PE=1 SV=1	hypothetical protein JCGZ_19947 [Jatropha curcas]
	VF13616	3114	8.60356	2.63864	2.96263	5.47768	3.09271	1.82222	#N/A	#N/A
	VF22652	3114	22.4991	18.9448	18.2373	20.3143	17.4607	16.1707	Protection of telomeres protein 1a GN=POT1A OS=Arabidopsis thaliana (Mouse-ear cress) PE=1 SV=1	conserved hypothetical protein [Ricinus communis]
	VF10525	3113	16.4882	9.80319	9.02367	12.0369	9.94583	8.72441	--	conserved hypothetical protein [Ricinus communis]
	VF17683	3113	42.2053	15.2486	17.3356	27.2996	17.6228	12.7214	--	hypothetical protein JCGZ_22215 [Jatropha curcas]
	VF18604	3113	634.801	421.609	471.265	481.87	391.169	369.141	H/ACA ribonucleoprotein complex subunit 3-like protein GN=At2g20490 OS=Arabidopsis thaliana (Mouse-ear cress) PE=2 SV=2	PREDICTED: H/ACA ribonucleoprotein complex subunit 3-like protein [Eucalyptus grandis]
	VF27912	3113	50.84	40.1087	40.1241	46.163	40.5454	36.9174	Zinc finger CCCH domain-containing protein 17 GN=At2g02160 OS=Arabidopsis thaliana (Mouse-ear cress) PE=1 SV=1	hypothetical protein JCGZ_01683 [Jatropha curcas]
	VF01457	3112	30.2262	23.5612	21.6819	25.4915	20.5456	17.3791	--	hypothetical protein JCGZ_22010 [Jatropha curcas]
	VF14518	3112	5.03454	2.53843	2.97587	3.84122	2.34771	1.77376	Cyclic pyranopterin monophosphate synthase, mitochondrial (Precursor) GN=CNX2 OS=Arabidopsis thaliana (Mouse-ear cress) PE=1 SV=1	hypothetical protein JCGZ_05265 [Jatropha curcas]
	VF16063	3112	168.252	78.1488	80.9465	128.617	79.8981	53.4892	Double-stranded RNA-binding protein 2 OS=Oryza sativa subsp. japonica (Rice) PE=2 SV=1	hypothetical protein JCGZ_23437 [Jatropha curcas]
	VF18123	3112	23.8276	18.6027	16.2988	19.3158	15.7275	15.423	--	Prefoldin chaperone subunit family protein, putative isoform 2 [Theobroma cacao]
	VF26873	3112	11.3907	7.77428	6.88605	7.91298	8.02431	5.93068	--	conserved hypothetical protein [Ricinus communis]
	VF00051	3111	33.0114	20.3393	18.2435	26.3072	21.4676	15.7389	Putative disease resistance protein RGA4 GN=RGA4 OS=Solanum bulbocastanum (Wild potato) PE=2 SV=1	hypothetical protein JCGZ_02620 [Jatropha curcas]
	VF19447	3111	23.506	16.3469	15.0652	16.6645	14.2566	14.2154	--	hypothetical protein JCGZ_21954 [Jatropha curcas]
	VF21186	3111	27.4332	57.7006	63.4854	44.85	63.3697	67.514	Quinone oxidoreductase-like protein At1g23740, chloroplastic (Precursor) GN=At1g23740 OS=Arabidopsis thaliana (Mouse-ear cress) PE=1 SV=2	hypothetical protein JCGZ_21373 [Jatropha curcas]
	VF13857	3110	7.62478	4.31267	4.72211	5.52678	3.40137	3.13912	Guanine nucleotide-binding protein-like NSN1 {ECO:0000305} OS=Arabidopsis thaliana (Mouse-ear cress) PE=2 SV=1	hypothetical protein JCGZ_05571 [Jatropha curcas]
	VF05264	3109	26.4169	17.7071	18.7189	21.2833	17.0227	16.8604	Nuclear ribonuclease Z GN=NUZ OS=Arabidopsis thaliana (Mouse-ear cress) PE=2 SV=3	hypothetical protein JCGZ_11592 [Jatropha curcas]
	VF01827	3108	9.25069	7.08895	6.61147	8.19993	6.61223	5.87522	--	conserved hypothetical protein [Ricinus communis]
	VF03648	3107	40.2228	26.1196	26.6641	33.7665	27.4063	23.115	--	conserved hypothetical protein [Ricinus communis]
	VF04336	3107	32.2277	24.4644	22.0935	25.1913	24.2135	18.3327	1-(5-phosphoribosyl)-5-[(5-phosphoribosylamino)methylideneamino] imidazole-4-carboxamide isomerase, chloroplastic (Precursor) GN=F2H17.16 OS=Arabidopsis thaliana (Mouse-ear cress) PE=2 SV=1	hypothetical protein JCGZ_06751 [Jatropha curcas]
	VF11983	3107	12.9239	7.86702	5.59445	9.24958	6.97357	5.36661	--	PREDICTED: uncharacterized protein LOC105111694 isoform X1 [Populus euphratica]
	VF22067	3107	48.0341	27.1738	29.7291	38.9039	28.3776	19.4377	Katanin p80 WD40 repeat-containing subunit B1 homolog {ECO:0000255|HAMAP-Rule:MF_03022} GN=At5g23430 OS=Arabidopsis thaliana (Mouse-ear cress) PE=2 SV=3	hypothetical protein JCGZ_17290 [Jatropha curcas]
	VF15756	3106	273.385	75.8359	57.247	180.932	68.0613	13.5794	Growth-regulating factor 1 OS=Oryza sativa subsp. japonica (Rice) PE=3 SV=1	hypothetical protein JCGZ_07476 [Jatropha curcas]
	VF24398	3106	20.8954	47.3697	41.1693	39.9529	42.9785	49.3486	Ferredoxin, root R-B2 OS=Raphanus sativus (Radish) PE=1 SV=1	hypothetical protein JCGZ_02174 [Jatropha curcas]
	VF07322	3105	40.1833	27.1714	26.1283	30.6748	25.7533	16.7295	E3 ubiquitin-protein ligase HOS1 GN=HOS1 OS=Arabidopsis thaliana (Mouse-ear cress) PE=1 SV=1	hypothetical protein JCGZ_03438 [Jatropha curcas]
	VF09169	3105	3.852	2.62173	2.83047	2.86526	2.42665	2.35904	Probable disease resistance protein At4g27220 GN=At4g27220 OS=Arabidopsis thaliana (Mouse-ear cress) PE=2 SV=1	Disease resistance protein RPM1, putative [Ricinus communis]
	VF28294	3105	19.8286	15.8577	16.6187	16.5349	15.9943	14.6011	DNA topoisomerase 3-beta GN=At2g32000 OS=Arabidopsis thaliana (Mouse-ear cress) PE=2 SV=1	hypothetical protein JCGZ_13118 [Jatropha curcas]
	VF02599	3104	41.6336	289.455	448.552	252.577	390.614	496.798	--	hypothetical protein JCGZ_25170 [Jatropha curcas]
	VF06318	3103	54.7971	77.832	79.9045	75.3342	74.4179	84.7303	COP9 signalosome complex subunit 1 GN=T20K12.40 OS=Arabidopsis thaliana (Mouse-ear cress) PE=1 SV=2	hypothetical protein JCGZ_14455 [Jatropha curcas]
	VF06576	3103	21.1058	7.1643	8.67374	9.01351	6.89378	4.94904	Protein Mut11 GN=Mut11 OS=Chlamydomonas reinhardtii (Chlamydomonas smithii) PE=2 SV=1	hypothetical protein JCGZ_08356 [Jatropha curcas]
	VF07577	3103	8.65553	4.8529	4.43348	5.60741	4.2932	4.2776	--	hypothetical protein JCGZ_22502 [Jatropha curcas]
	VF17208	3103	80.3404	65.6048	64.8449	67.4608	67.2878	57.1591	Clp protease-related protein At4g12060, chloroplastic (Precursor) GN=At4g12060 OS=Arabidopsis thaliana (Mouse-ear cress) PE=1 SV=1	hypothetical protein JCGZ_26214 [Jatropha curcas]
	VF19233	3103	3.15685	8.06902	8.0808	5.72809	7.02104	9.82863	--	hypothetical protein JCGZ_03983 [Jatropha curcas]
	VF26813	3103	89.5032	58.1406	43.1679	67.8725	46.3366	28.8041	--	hypothetical protein JCGZ_02972 [Jatropha curcas]
	VF07248	3102	112.721	84.894	85.5787	98.3631	91.3834	76.9695	--	hypothetical protein JCGZ_21406 [Jatropha curcas]
	VF25885	3102	2.05739	1.34602	1.51519	1.55803	1.31923	1.06309	BTB/POZ domain-containing protein At5g48130 GN=At5g48130 OS=Arabidopsis thaliana (Mouse-ear cress) PE=2 SV=1	protein binding protein, putative [Ricinus communis]
	VF15499	3101	12.9951	17.6221	17.7097	15.4556	19.1466	19.564	Putative dual specificity protein phosphatase DSP8 GN=DSP8 OS=Arabidopsis thaliana (Mouse-ear cress) PE=2 SV=2	hypothetical protein JCGZ_07343 [Jatropha curcas]
	VF17213	3101	70.7966	45.4619	44.6662	59.3765	44.1654	32.3026	Peptidyl-prolyl cis-trans isomerase FKBP53 GN=FKBP53 OS=Arabidopsis thaliana (Mouse-ear cress) PE=1 SV=1	hypothetical protein JCGZ_26220 [Jatropha curcas]
	VF11273	3099	39.105	48.7797	52.9845	45.3237	52.5934	57.2097	Cationic amino acid transporter 9, chloroplastic (Precursor) GN=CAT9 OS=Arabidopsis thaliana (Mouse-ear cress) PE=2 SV=1	hypothetical protein JCGZ_14597 [Jatropha curcas]
	VF15824	3099	24.2808	14.6456	13.6452	19.3879	15.6948	11.9879	--	hypothetical protein JCGZ_20305 [Jatropha curcas]
	VF16243	3099	26.0078	17.5957	15.7208	19.7532	18.137	15.5922	U11/U12 small nuclear ribonucleoprotein 48 kDa protein GN=SNRNP48 OS=Arabidopsis thaliana (Mouse-ear cress) PE=2 SV=1	hypothetical protein JCGZ_23603 [Jatropha curcas]
	VF18686	3099	66.7599	91.148	84.2945	79.2834	86.9477	96.0017	CBS domain-containing protein CBSX1, chloroplastic (Precursor) OS=Arabidopsis thaliana (Mouse-ear cress) PE=1 SV=2	hypothetical protein JCGZ_12432 [Jatropha curcas]
	VF22759	3098	18.0715	11.977	11.3473	14.8699	12.3775	8.29957	--	hypothetical protein RCOM_1211540 [Ricinus communis]
	VF28031	3097	50.7677	8.27342	5.37438	18.2884	4.74943	3.62561	Heat stress transcription factor C-1 GN=MOB24.9 OS=Arabidopsis thaliana (Mouse-ear cress) PE=2 SV=1	hypothetical protein JCGZ_07238 [Jatropha curcas]
	VF12285	3096	2.59206	0.570571	0.910405	0.946151	0.748906	0.35424	Carrot ABA-induced in somatic embryos 3 {ECO:0000303|Ref.1} OS=Daucus carota (Wild carrot) PE=2 SV=1	hypothetical protein JCGZ_00457 [Jatropha curcas]
	VF18960	3096	99.9853	62.6741	61.1808	77.0748	59.8618	58.2102	--	hypothetical protein JCGZ_01571 [Jatropha curcas]
	VF19132	3096	41.3646	30.8837	31.2954	34.211	33.3713	29.7079	#N/A	#N/A
	VF00896	3095	114.679	84.3617	78.0191	96.3064	85.0641	61.6388	DEAD-box ATP-dependent RNA helicase 51 GN=RH51 OS=Arabidopsis thaliana (Mouse-ear cress) PE=2 SV=1	hypothetical protein JCGZ_19228 [Jatropha curcas]
	VF09458	3095	81.4631	40.5416	43.2258	52.5448	48.4283	37.6041	Mediator of RNA polymerase II transcription subunit 22a GN=F3O9.23 OS=Arabidopsis thaliana (Mouse-ear cress) PE=1 SV=1	hypothetical protein JCGZ_16659 [Jatropha curcas]
	VFNG1917	3095	8.71706	2.72091	2.47382	4.90263	3.1223	2.09829	--	PREDICTED: uncharacterized protein LOC103719063 isoform X1 [Phoenix dactylifera]
	VF04334	3094	14.6317	8.99879	9.51714	9.50079	9.40677	7.71895	--	conserved hypothetical protein [Ricinus communis]
	VF22511	3094	4.97943	3.21174	2.93821	3.36747	2.51325	1.78114	--	zinc finger protein, putative [Ricinus communis]
	VF05728	3093	18.4879	13.9941	12.2185	14.0522	12.062	9.48918	Gibberellin 2-beta-dioxygenase 8 GN=GA2OX8 OS=Arabidopsis thaliana (Mouse-ear cress) PE=1 SV=2	hypothetical protein JCGZ_06417 [Jatropha curcas]
	VF21120	3093	37.1151	17.6306	22.3547	24.5422	16.4439	15.6497	Transcription factor BOA GN=F2O15.230 OS=Arabidopsis thaliana (Mouse-ear cress) PE=2 SV=1	hypothetical protein JCGZ_18291 [Jatropha curcas]
	VF25234	3093	105.586	84.6188	88.1593	95.3053	86.6972	75.5658	--	transporter, putative [Ricinus communis]
	VFNG3220	3093	19.1136	13.4383	10.0407	12.9637	10.3545	8.33665	#N/A	#N/A
	VF07637	3092	5.91248	3.11938	2.62327	4.65826	2.98363	1.77985	--	hypothetical protein POPTR_0006s21190g [Populus trichocarpa]
	VF24315	3092	122.982	85.2802	86.9506	103.294	86.3118	80.8949	50S ribosomal protein L3-2, chloroplastic (Precursor) GN=RPL3B OS=Arabidopsis thaliana (Mouse-ear cress) PE=2 SV=1	hypothetical protein JCGZ_19089 [Jatropha curcas]
	VF25123	3092	136	92.6424	96.3268	113.067	104.842	81.2466	Auxin response factor 2 GN=MTG10.3 OS=Arabidopsis thaliana (Mouse-ear cress) PE=1 SV=2	hypothetical protein JCGZ_26377 [Jatropha curcas]
	VF00265	3091	8.84951	6.26136	5.06163	6.11843	4.9471	4.65939	Pentatricopeptide repeat-containing protein At3g51320 GN=At3g51320 OS=Arabidopsis thaliana (Mouse-ear cress) PE=2 SV=1	PREDICTED: pentatricopeptide repeat-containing protein At3g51320 [Populus euphratica]
	VF04125	3091	302.078	259.73	255.305	277.516	261.031	229.049	RuBisCO large subunit-binding protein subunit beta, chloroplastic (Precursor) OS=Pisum sativum (Garden pea) PE=1 SV=2	hypothetical protein JCGZ_16190 [Jatropha curcas]
	VF09921	3091	21.2571	10.2901	10.3641	15.3869	11.8366	8.8419	Uncharacterized protein At2g33490 GN=At2g33490 OS=Arabidopsis thaliana (Mouse-ear cress) PE=4 SV=2	hypothetical protein JCGZ_23122 [Jatropha curcas]
	VF01257	3090	34.9661	25.0083	28.1239	28.9479	26.4029	24.2904	--	conserved hypothetical protein [Ricinus communis]
	VF01543	3090	160.945	103.178	90.3337	100.81	96.5999	81.5244	Probable U6 snRNA-associated Sm-like protein LSm4 OS=Nicotiana tabacum (Common tobacco) PE=2 SV=1	Small nuclear ribonucleoprotein SM D3, putative [Ricinus communis]
	VF09254	3090	20.0734	55.8238	62.9644	40.0488	51.7337	73.3237	--	fumarylacetoacetate hydrolase, putative [Ricinus communis]
	VF07567	3088	9.42206	16.0599	17.0513	13.5385	16.6156	17.2843	--	hypothetical protein JCGZ_13442 [Jatropha curcas]
	VF08073	3088	6.26597	3.58603	3.14629	3.80242	3.97975	2.24882	Pentatricopeptide repeat-containing protein At5g27110 OS=Arabidopsis thaliana (Mouse-ear cress) PE=2 SV=2	unnamed protein product [Vitis vinifera]
	VF12244	3088	37.2848	15.9846	16.3121	21.0409	15.2114	14.6458	MATE efflux family protein 2, chloroplastic (Precursor) GN=DTX44 OS=Arabidopsis thaliana (Mouse-ear cress) PE=2 SV=1	hypothetical protein JCGZ_00416 [Jatropha curcas]
	VF12845	3088	26.4436	44.4948	48.9686	44.8118	48.5356	50.6336	Long chain acyl-CoA synthetase 9, chloroplastic GN=LACS9 OS=Arabidopsis thaliana (Mouse-ear cress) PE=2 SV=1	hypothetical protein JCGZ_12089 [Jatropha curcas]
	VF19784	3088	40.3517	26.3593	27.6306	32.1295	27.7895	25.7416	Replication factor C subunit 1 GN=RFC1 OS=Arabidopsis thaliana (Mouse-ear cress) PE=2 SV=1	hypothetical protein JCGZ_23917 [Jatropha curcas]
	VF01214	3087	85.7989	56.8371	57.5484	66.2627	64.9777	46.2971	Nuclear pore complex protein NUP1 OS=Arabidopsis thaliana (Mouse-ear cress) PE=1 SV=1	hypothetical protein JCGZ_19334 [Jatropha curcas]
	VF15320	3087	17.9066	10.5045	8.66756	13.2613	10.9715	8.23766	Transcription factor bHLH121 GN=MPN9.10 OS=Arabidopsis thaliana (Mouse-ear cress) PE=2 SV=1	hypothetical protein JCGZ_06542 [Jatropha curcas]
	VF15314	3086	4.1472	1.95616	2.00416	3.088	2.03917	1.62104	Pentatricopeptide repeat-containing protein At1g25360 GN=PCMP-H74 OS=Arabidopsis thaliana (Mouse-ear cress) PE=2 SV=1	pentatricopeptide repeat-containing protein, putative [Ricinus communis]
	VF20537	3086	13.1708	8.06674	7.41875	9.14415	7.7366	7.40954	Phospholipase SGR2 GN=SGR2 OS=Arabidopsis thaliana (Mouse-ear cress) PE=1 SV=1	hypothetical protein JCGZ_17221 [Jatropha curcas]
	VFNG340	3086	28.5816	9.82286	5.68036	16.0542	11.0343	5.2966	Methylsterol monooxygenase 1-2 GN=SMO1-2 OS=Arabidopsis thaliana (Mouse-ear cress) PE=2 SV=1	hypothetical protein JCGZ_14524 [Jatropha curcas]
	VF23837	3085	5.21463	3.64162	3.45727	3.811	3.22321	2.33511	Pentatricopeptide repeat-containing protein At1g50270 GN=F14I3.12 OS=Arabidopsis thaliana (Mouse-ear cress) PE=2 SV=1	pentatricopeptide repeat-containing protein, putative [Ricinus communis]
	VF06685	3084	5.2782	2.65963	2.92537	2.86966	2.87688	1.82324	Putative disease resistance protein At3g14460 GN=At3g14460 OS=Arabidopsis thaliana (Mouse-ear cress) PE=3 SV=1	hypothetical protein JCGZ_16874 [Jatropha curcas]
	VF00212	3083	4.11705	1.80703	0.945188	2.75408	1.71817	0.627418	DELLA protein GAI GN=GAI OS=Gossypium hirsutum (Upland cotton) PE=2 SV=1	PREDICTED: DELLA protein GAIP-like isoform X2 [Populus euphratica]
	VF00981	3083	386.169	740.597	840.661	646.6	882.647	868.43
	VF27259	3082	51.1193	46.4677	46.9769	46.9237	46.9005	44.5704	Zinc transporter ZTP29 GN=ZTP29 OS=Arabidopsis thaliana (Mouse-ear cress) PE=2 SV=1	integral membrane protein, putative [Ricinus communis]
	VF02636	3081	4.80247	2.70365	2.96701	3.23668	2.09463	2.14586	#N/A	#N/A
	VF19600	3080	15.875	8.79652	7.86998	12.3632	9.76956	6.3295	--	hypothetical protein RCOM_0992860 [Ricinus communis]
	VF18916	3079	44.4799	75.2826	81.1015	65.3638	79.5094	81.0707	Coatomer subunit alpha-1 GN=At1g62020 OS=Arabidopsis thaliana (Mouse-ear cress) PE=2 SV=2	hypothetical protein JCGZ_26756 [Jatropha curcas]
	VF22524	3079	15.7168	11.402	12.5754	13.4513	12.4206	10.5376	NADPH-dependent diflavin oxidoreductase 1 {ECO:0000255|HAMAP-Rule:MF_03178} GN=ATR3 OS=Arabidopsis thaliana (Mouse-ear cress) PE=1 SV=1	hypothetical protein JCGZ_12975 [Jatropha curcas]
	VF24250	3079	11.8606	6.445	7.74933	9.48497	6.9837	5.41946	--	PREDICTED: uncharacterized protein LOC100266792 isoform X2 [Vitis vinifera]
	VFNG575	3079	10.7614	6.10797	5.28344	6.69782	5.21355	5.19587	NADPH:quinone oxidoreductase GN=NQR OS=Arabidopsis thaliana (Mouse-ear cress) PE=1 SV=1	NADPH:quinone oxidoreductase, putative [Ricinus communis]
	VF06797	3077	22.2777	15.506	16.4378	17.9991	17.4308	14.8807	Mitochondrial adenine nucleotide transporter ADNT1 OS=Arabidopsis thaliana (Mouse-ear cress) PE=2 SV=1	JHL07K02.2 [Jatropha curcas]
	VF08860	3077	15.0932	19.8721	20.8014	17.2839	20.4648	22.9519	Geranylgeranyl transferase type-1 subunit beta GN=F12L6 OS=Arabidopsis thaliana (Mouse-ear cress) PE=1 SV=1	hypothetical protein JCGZ_01482 [Jatropha curcas]
	VF25967	3077	9.75018	4.20621	5.40985	6.17687	4.30963	4.02087	MLO-like protein 13 GN=MLO13 OS=Arabidopsis thaliana (Mouse-ear cress) PE=2 SV=1	hypothetical protein JCGZ_13393 [Jatropha curcas]
	VF04756	3076	19.5862	13.834	14.1646	16.147	14.3525	13.5963	Mediator of RNA polymerase II transcription subunit 8 GN=T17M13.24 OS=Arabidopsis thaliana (Mouse-ear cress) PE=1 SV=1	hypothetical protein JCGZ_22588 [Jatropha curcas]
	VF06399	3075	55.2723	37.6336	37.212	45.4866	41.1586	28.3693	Serine/threonine-protein kinase PEPKR2 GN=PEPKR2 OS=Arabidopsis thaliana (Mouse-ear cress) PE=2 SV=1	calcium-dependent protein kinase [Hevea brasiliensis]
	VF12162	3075	28.0887	50.0324	52.0836	47.8703	46.6692	55.825	6,7-dimethyl-8-ribityllumazine synthase, chloroplastic (Precursor) GN=At2g44050 OS=Arabidopsis thaliana (Mouse-ear cress) PE=2 SV=1	hypothetical protein JCGZ_06502 [Jatropha curcas]
	VF00042	3074	25.3459	17.6684	15.3744	18.565	13.3754	13.9373	RNA polymerase sigma factor sigB (Precursor) GN=At1g08540 OS=Arabidopsis thaliana (Mouse-ear cress) PE=2 SV=2	hypothetical protein JCGZ_02630 [Jatropha curcas]
	VF01947	3074	26.579	18.5246	17.9808	19.615	19.0851	17.416	--	hypothetical protein JCGZ_01854 [Jatropha curcas]
	VF09395	3074	36.7384	27.2499	21.9523	30.3157	23.0726	18.6078	--	hypothetical protein JCGZ_19027 [Jatropha curcas]
	VF19173	3074	8.48861	1.72307	3.1944	2.95991	1.36418	0.551999	#N/A	#N/A
	VF22519	3074	10.747	7.48821	6.94893	7.57626	7.49737	6.59044	Pre-mRNA-processing protein 40A OS=Arabidopsis thaliana (Mouse-ear cress) PE=1 SV=1	hypothetical protein JCGZ_26715 [Jatropha curcas]
	VFNG4894	3074	35.0719	57.3695	59.5565	46.7533	57.3883	61.4873	--	hypothetical protein JCGZ_13183 [Jatropha curcas]
	VF03841	3073	0.785307	4.03209	3.37988	2.42431	4.55621	5.06654	--	hypothetical protein JCGZ_00626 [Jatropha curcas]
	VF14979	3073	3.13769	1.38565	0.733107	1.54938	1.49861	0.554519	#N/A	#N/A
	VF24077	3073	59.902	43.8969	47.3342	47.4686	41.5487	38.0556	50S ribosomal protein L9, chloroplastic {ECO:0000255|HAMAP-Rule:MF_00503} OS=Porphyra purpurea (Red seaweed) PE=3 SV=1	hypothetical protein JCGZ_24007 [Jatropha curcas]
	VF13686	3071	10.2668	6.50731	7.1615	7.02387	7.01582	5.7242	D-cysteine desulfhydrase 2, mitochondrial (Precursor) GN=At3g26115 OS=Arabidopsis thaliana (Mouse-ear cress) PE=2 SV=1	hypothetical protein JCGZ_17867 [Jatropha curcas]
	VF08729	3069	11.8686	5.11239	4.78979	6.51292	5.62501	4.54223	Disease resistance protein RPS4 {ECO:0000303|PubMed:10571887} OS=Arabidopsis thaliana (Mouse-ear cress) PE=1 SV=1	leucine-rich repeat-containing protein, putative [Ricinus communis]
	VF05223	3068	45.5961	26.3782	28.1403	32.7334	30.3005	25.6043	--	hypothetical protein JCGZ_11555 [Jatropha curcas]
	VF11848	3068	45.5348	26.2239	25.0843	32.1062	27.7268	24.6835	Transcription initiation factor TFIID subunit 5 GN=TAF5 OS=Arabidopsis thaliana (Mouse-ear cress) PE=1 SV=1	hypothetical protein JCGZ_07094 [Jatropha curcas]
	VF16001	3068	20.7325	13.9983	14.9392	15.339	14.3154	13.6494	--	hypothetical protein JCGZ_23380 [Jatropha curcas]
	VF00570	3067	3.68203	1.88632	1.96762	2.9664	2.00665	1.18347	Pentatricopeptide repeat-containing protein At1g03100, mitochondrial (Precursor) GN=At1g03100 OS=Arabidopsis thaliana (Mouse-ear cress) PE=2 SV=1	hypothetical protein JCGZ_19777 [Jatropha curcas]
	VF03926	3067	65.9977	44.9281	46.1704	53.889	40.6298	41.5981	--	conserved hypothetical protein [Ricinus communis]
	VF07450	3065	39.4659	22.0165	23.1665	28.3888	22.1474	21.7349	--	hypothetical protein JCGZ_22136 [Jatropha curcas]
	VF12031	3065	3.1262	1.81393	1.32993	2.35285	1.5831	1.26081	Histone-lysine N-methyltransferase SUVR4 GN=T27C4.2 OS=Arabidopsis thaliana (Mouse-ear cress) PE=1 SV=2	hypothetical protein VITISV_003700 [Vitis vinifera]
	VF12688	3065	24.0252	13.5076	12.9853	17.0471	16.4785	11.3211	Exportin-T GN=PSD OS=Arabidopsis thaliana (Mouse-ear cress) PE=2 SV=1	hypothetical protein JCGZ_24693 [Jatropha curcas]
	VF08920	3064	9.81396	16.3348	19.0793	13.6845	17.7746	21.9878	U-box domain-containing protein 11 GN=PUB11 OS=Arabidopsis thaliana (Mouse-ear cress) PE=2 SV=2	hypothetical protein JCGZ_13751 [Jatropha curcas]
	VF11278	3064	49.7546	37.2019	36.1517	42.4892	35.3315	35.2714	--	hypothetical protein JCGZ_14603 [Jatropha curcas]
	VF24541	3062	71.2277	53.7251	44.9707	59.9832	50.6794	43.546	Acidic leucine-rich nuclear phosphoprotein 32-related protein GN=At3g50690 OS=Arabidopsis thaliana (Mouse-ear cress) PE=2 SV=1	hypothetical protein JCGZ_19112 [Jatropha curcas]
	VFNG3204	3062	17.6849	8.77802	8.12982	11.9849	9.2252	7.88621	Importin subunit alpha-1b OS=Oryza sativa subsp. japonica (Rice) PE=1 SV=2	importin alpha, putative [Ricinus communis]
	VF15836	3061	53.4676	29.5618	25.6474	35.9142	33.9833	24.586	Outer envelope protein 64, chloroplastic GN=MEB5.19 OS=Arabidopsis thaliana (Mouse-ear cress) PE=1 SV=1	hypothetical protein JCGZ_23222 [Jatropha curcas]
	VF21446	3061	38.8881	22.4397	23.7647	27.6621	23.9384	22.4833	Zinc finger CCCH domain-containing protein 6 GN=At1g19860 OS=Arabidopsis thaliana (Mouse-ear cress) PE=2 SV=1	hypothetical protein JCGZ_08243 [Jatropha curcas]
	VF08645	3060	27.1351	17.1338	16.578	20.7232	18.1671	16.2104	--	hypothetical protein JCGZ_06201 [Jatropha curcas]
	VF23701	3060	2.29535	0.931211	1.29341	1.44413	1.25609	0.89804	Pentatricopeptide repeat-containing protein At3g58590 GN=At3g58590 OS=Arabidopsis thaliana (Mouse-ear cress) PE=2 SV=2	hypothetical protein JCGZ_12237 [Jatropha curcas]
	VF16412	3059	5.61983	2.53597	0.598933	3.06811	1.36938	0.658769	MATE efflux family protein 5 GN=F3L12.12 OS=Arabidopsis thaliana (Mouse-ear cress) PE=3 SV=1	multidrug resistance pump, putative [Ricinus communis]
	VF19915	3058	14.371	9.41794	8.12699	12.1723	8.47891	6.98473	Dicer-like protein 4 GN=DCL4 OS=Arabidopsis thaliana (Mouse-ear cress) PE=1 SV=2	protein with unknown function [Ricinus communis]
	VF06028	3057	26.8605	18.9586	17.9649	23.3005	19.4343	14.5119	KH domain-containing protein At3g08620 GN=At3g08620 OS=Arabidopsis thaliana (Mouse-ear cress) PE=2 SV=1	hypothetical protein JCGZ_19216 [Jatropha curcas]
	VF12670	3057	74.3931	13.5649	23.2358	37.4845	20.848	14.1369	--	hypothetical protein POPTR_0009s01390g [Populus trichocarpa]
	VF17055	3057	49.1095	42.2005	42.8532	42.7879	43.0376	40.5636	Pumilio homolog 1 GN=APUM1 OS=Arabidopsis thaliana (Mouse-ear cress) PE=1 SV=1	hypothetical protein JCGZ_01426 [Jatropha curcas]
	VF27650	3057	15.3173	11.794	11.4274	13.1062	12.3461	11.2554	Ubiquitin-like-specific protease 1D GN=T13D8.11 OS=Arabidopsis thaliana (Mouse-ear cress) PE=1 SV=1	hypothetical protein JCGZ_17731 [Jatropha curcas]
	VF04668	3056	28.3375	16.3345	13.2667	19.2084	16.1579	13.8934	--	conserved hypothetical protein [Ricinus communis]
	VF12100	3056	24.5635	15.0723	12.7338	14.5069	11.189	6.99497	Protection of telomeres protein 1a GN=POT1A OS=Arabidopsis thaliana (Mouse-ear cress) PE=1 SV=1	conserved hypothetical protein [Ricinus communis]
	VF21996	3056	3.00118	2.16623	2.09817	2.20599	1.78545	1.63165	Protein GAMETE EXPRESSED 2 GN=GEX2 OS=Arabidopsis thaliana (Mouse-ear cress) PE=2 SV=1	hypothetical protein JCGZ_23765 [Jatropha curcas]
	VF26999	3055	13.5431	21.6354	24.2351	21.0973	26.7868	26.7362	F-box/LRR-repeat protein At3g48880 GN=At3g48880 OS=Arabidopsis thaliana (Mouse-ear cress) PE=2 SV=1	conserved hypothetical protein [Ricinus communis]
	VF00209	3054	89.6773	162.728	178.948	148.041	149.162	183.107	--	conserved hypothetical protein [Ricinus communis]
	VF02793	3054	9.63803	13.9008	16.3528	12.763	16.0405	16.7239	Nicotinate-nucleotide pyrophosphorylase [carboxylating], chloroplastic (Precursor) GN=QPT OS=Arabidopsis thaliana (Mouse-ear cress) PE=2 SV=2	hypothetical protein JCGZ_04686 [Jatropha curcas]
	VF15955	3053	12.4751	23.5689	23.6906	16.8197	23.5839	26.5763	F-box protein At1g55000 GN=At1g55000 OS=Arabidopsis thaliana (Mouse-ear cress) PE=1 SV=1	hypothetical protein JCGZ_23343 [Jatropha curcas]
	VF16409	3053	26.9309	22.3865	21.9445	22.3952	22.4542	19.5365	Probable beta-1,4-xylosyltransferase IRX9H GN=IRX9H OS=Arabidopsis thaliana (Mouse-ear cress) PE=2 SV=2	hypothetical protein JCGZ_15945 [Jatropha curcas]
	VFNG3108	3053	129.037	75.7315	72.4479	106.748	64.1008	55.9176	Glutathione S-transferase T1 GN=MEE6.28 OS=Arabidopsis thaliana (Mouse-ear cress) PE=2 SV=1	hypothetical protein JCGZ_20606 [Jatropha curcas]
	VF14614	3052	2.12915	1.42521	1.31177	1.69429	1.57072	1.04603	Pentatricopeptide repeat-containing protein At4g20770 GN=PCMP-E35 OS=Arabidopsis thaliana (Mouse-ear cress) PE=3 SV=2	hypothetical protein JCGZ_09136 [Jatropha curcas]
	VF17713	3052	86.0663	67.984	62.4222	67.2908	58.4169	58.783	--	hypothetical protein JCGZ_12679 [Jatropha curcas]
	VF03537	3051	33.6571	50.862	59.8836	48.3958	52.0449	59.4856	DEAD-box ATP-dependent RNA helicase 20 GN=RH20 OS=Arabidopsis thaliana (Mouse-ear cress) PE=2 SV=1	dead box ATP-dependent RNA helicase, putative [Ricinus communis]
	VF10659	3051	3.18065	2.02945	2.07961	2.61104	2.31223	1.57466	Probable LRR receptor-like serine/threonine-protein kinase At4g36180 (Precursor) GN=At4g36180 OS=Arabidopsis thaliana (Mouse-ear cress) PE=2 SV=1	serine-threonine protein kinase, plant-type, putative [Ricinus communis]
	VF24053	3051	16.274	10.1953	11.1434	12.2579	12.1453	8.49288	Pentatricopeptide repeat-containing protein At2g16880 GN=At2g16880 OS=Arabidopsis thaliana (Mouse-ear cress) PE=2 SV=1	hypothetical protein JCGZ_01815 [Jatropha curcas]
	VF27087	3051	38.4704	19.322	19.618	25.1646	21.3631	18.801	Protein REVEILLE 6 GN=RVE6 OS=Arabidopsis thaliana (Mouse-ear cress) PE=2 SV=1	hypothetical protein JCGZ_26052 [Jatropha curcas]
	VF01014	3050	79.5488	358.353	365.646	189.354	342.033	491.641	Probable aquaporin PIP-type 7a GN=TRG-31 OS=Pisum sativum (Garden pea) PE=2 SV=2	plasma membrane intrinsic protein 1 [Jatropha curcas]
	VF04021	3050	5.25263	1.80663	1.29919	3.03966	1.69972	1.33835	--	hypothetical protein POPTR_0018s09720g [Populus trichocarpa]
	VF08739	3050	242.583	98.1115	116.952	132.244	102.554	96.7578	50S ribosomal protein L17, chloroplastic (Precursor) GN=RPL17 OS=Nicotiana tabacum (Common tobacco) PE=2 SV=1	PREDICTED: 50S ribosomal protein L17, chloroplastic-like [Sesamum indicum]
	VF19326	3050	5.43254e-05	25.1241	19.7695	15.6883	31.1593	33.5966	Transmembrane 9 superfamily member 11 {ECO:0000305} (Precursor) OS=Arabidopsis thaliana (Mouse-ear cress) PE=2 SV=1	hypothetical protein JCGZ_03976 [Jatropha curcas]
	VF27140	3050	21.9415	28.2675	29.005	25.5898	27.3452	29.3597	Plastid division protein PDV1 GN=PDV1 OS=Arabidopsis thaliana (Mouse-ear cress) PE=1 SV=1	hypothetical protein JCGZ_26010 [Jatropha curcas]
	VFNG1086	3050	3.95652	0.627788	1.0294	1.13269	0.293824	0.296518	#N/A	#N/A
	VF11469	3049	24.9631	41.7906	42.9673	40.958	46.3362	54.6604	Adagio protein 1 GN=MSF19.2 OS=Arabidopsis thaliana (Mouse-ear cress) PE=1 SV=2	hypothetical protein JCGZ_10355 [Jatropha curcas]
	VF12230	3048	12.4295	24.0021	27.1054	20.5511	24.5538	26.3869	--	hypothetical protein JCGZ_00402 [Jatropha curcas]
	VFNG2512	3048	6.54093	4.93342	4.16692	5.32307	3.83312	3.59971	Putative ribonuclease H protein At1g65750 GN=At1g65750 OS=Arabidopsis thaliana (Mouse-ear cress) PE=3 SV=1	PREDICTED: uncharacterized protein LOC102617714 [Citrus sinensis]
	VF01646	3047	42.4619	34.8037	30.5492	36.3104	34.1299	28.3451	Uncharacterized protein At1g04910 GN=At1g04910 OS=Arabidopsis thaliana (Mouse-ear cress) PE=2 SV=1	hypothetical protein JCGZ_25624 [Jatropha curcas]
	VF06008	3047	11.1657	8.76957	8.88219	9.60467	9.4971	7.78514	Probable alanine--tRNA ligase, chloroplastic {ECO:0000255|HAMAP-Rule:MF_03134} GN=POPTRDRAFT_821063 OS=Populus trichocarpa (Western balsam poplar) PE=3 SV=1	hypothetical protein JCGZ_03949 [Jatropha curcas]
	VF13434	3047	53.3235	85.2723	95.4679	75.4478	89.607	93.252	--	hypothetical protein JCGZ_04204 [Jatropha curcas]
	VF20940	3047	4.84071	2.74221	2.70756	3.49539	2.89065	2.63835	Uncharacterized protein At4g15970 GN=At4g15970 OS=Arabidopsis thaliana (Mouse-ear cress) PE=2 SV=1	hypothetical protein JCGZ_10131 [Jatropha curcas]
	VFNG4041	3047	10.6457	6.19682	5.78789	7.71931	6.44655	5.77573	Putative ribonuclease H protein At1g65750 GN=At1g65750 OS=Arabidopsis thaliana (Mouse-ear cress) PE=3 SV=1	hypothetical protein PRUPE_ppa022115mg [Prunus persica]
	VF02103	3046	75.9682	52.9038	51.3746	51.5001	50.7394	42.4477	DNA damage-binding protein 1a GN=DDB1A OS=Arabidopsis thaliana (Mouse-ear cress) PE=1 SV=1	hypothetical protein JCGZ_09253 [Jatropha curcas]
	VF02683	3046	54.2402	71.0139	70.129	67.1655	73.715	72.2783	3-oxoacyl-[acyl-carrier-protein] synthase I, chloroplastic (Precursor) GN=KAS1 OS=Arabidopsis thaliana (Mouse-ear cress) PE=2 SV=2	hypothetical protein JCGZ_04596 [Jatropha curcas]
	VFNG648	3046	12.8312	8.9352	8.11192	9.49634	7.56665	7.99178	--	hypothetical protein PHAVU_002G014500g [Phaseolus vulgaris]
	VF23707	3045	6.75915	2.31715	1.04174	2.74251	1.2896	1.23193	3-ketoacyl-CoA synthase 21 GN=KCS21 OS=Arabidopsis thaliana (Mouse-ear cress) PE=2 SV=1	PREDICTED: 3-ketoacyl-CoA synthase 21-like [Populus euphratica]
	VF25751	3044	65.3881	71.7639	75.2486	72.5401	73.1997	77.4804	--	hypothetical protein JCGZ_23957 [Jatropha curcas]
	VF25933	3044	22.186	16.4148	17.0618	19.6964	15.77	15.2645	#N/A	#N/A
	VF08367	3043	70.1377	87.1899	96.5029	83.3002	89.1646	95.9933	Gamma carbonic anhydrase 1, mitochondrial (Precursor) OS=Arabidopsis thaliana (Mouse-ear cress) PE=1 SV=1	hypothetical protein JCGZ_04452 [Jatropha curcas]
	VF15147	3043	14.2216	6.66479	3.21879	5.6215	4.22007	2.62379	#N/A	#N/A
	VF23950	3043	9.35276	7.19848	5.88434	7.85656	6.7155	5.38229	Fanconi-associated nuclease 1 homolog GN=At1g48360 OS=Arabidopsis thaliana (Mouse-ear cress) PE=2 SV=2	hypothetical protein JCGZ_05775 [Jatropha curcas]
	VF24295	3042	27.1931	16.7675	14.2341	19.3894	16.0258	14.9887	DEAD-box ATP-dependent RNA helicase 50 GN=F17A9.13 OS=Arabidopsis thaliana (Mouse-ear cress) PE=2 SV=2	hypothetical protein JCGZ_19102 [Jatropha curcas]
	VF27233	3042	52.4849	37.4611	39.3965	42.9791	42.4079	35.6882	--	hypothetical protein JCGZ_25927 [Jatropha curcas]
	VF20981	3041	42.917	36.9637	35.4795	39.9541	36.8231	32.5645	--	hypothetical protein JCGZ_00443 [Jatropha curcas]
	VF14940	3040	47.7107	1.35459	0.887913	15.1706	1.72775	0.348563	--	hypothetical protein JCGZ_07459 [Jatropha curcas]
	VF04384	3039	100.059	65.0726	71.2542	76.8691	71.0588	66.0221	mRNA-decapping enzyme-like protein GN=At1g08370 OS=Arabidopsis thaliana (Mouse-ear cress) PE=1 SV=2	conserved hypothetical protein [Ricinus communis]
	VF12309	3039	42.6051	25.0705	24.1709	35.8467	26.8507	18.774	Putative E3 ubiquitin-protein ligase XBAT34 OS=Arabidopsis thaliana (Mouse-ear cress) PE=2 SV=1	hypothetical protein JCGZ_25013 [Jatropha curcas]
	VF03645	3038	34.966	16.0493	17.5063	25.5419	16.1581	14.931	Zinc finger CCCH domain-containing protein 16 OS=Arabidopsis thaliana (Mouse-ear cress) PE=1 SV=2	hypothetical protein JCGZ_19788 [Jatropha curcas]
	VFNG3220	3038	19.1136	13.4383	10.0407	12.9637	10.3545	8.33665	#N/A	#N/A
	VF01711	3036	2.8612	1.06134	1.03282	1.55462	0.703778	0.896091	F-box/LRR-repeat protein At1g67190 GN=At1g67190 OS=Arabidopsis thaliana (Mouse-ear cress) PE=2 SV=1	conserved hypothetical protein [Ricinus communis]
	VF14297	3035	10.1473	16.4676	19.1267	13.4245	18.0464	20.8696	Uncharacterized protein At5g39865 GN=At5g39865 OS=Arabidopsis thaliana (Mouse-ear cress) PE=2 SV=1	hypothetical protein JCGZ_24520 [Jatropha curcas]
	VF17961	3035	21.1152	51.6505	56.2492	44.9279	56.2704	55.1903	F-box protein At1g47056 GN=At1g47056 OS=Arabidopsis thaliana (Mouse-ear cress) PE=2 SV=1	hypothetical protein JCGZ_16096 [Jatropha curcas]
	VF24664	3035	20.999	24.6304	25.6865	23.948	24.9456	25.3922	Probable arabinosyltransferase ARAD1 GN=ARAD1 OS=Arabidopsis thaliana (Mouse-ear cress) PE=1 SV=1	hypothetical protein JCGZ_17950 [Jatropha curcas]
	VF03503	3034	8.2981	1.9184	0.942357	5.42001	1.71776	0.23394	MEPFL3 {ECO:0000305} (Precursor) GN=MDC16 OS=Arabidopsis thaliana (Mouse-ear cress) PE=1 SV=1	hypothetical protein JCGZ_24747 [Jatropha curcas]
	VF03767	3034	14.8729	5.54257	5.18571	8.07094	6.6082	5.12155	Pentatricopeptide repeat-containing protein At2g38420, mitochondrial (Precursor) GN=At2g38420 OS=Arabidopsis thaliana (Mouse-ear cress) PE=2 SV=2	hypothetical protein JCGZ_00390 [Jatropha curcas]
	VF27904	3034	261.012	208.744	200.954	216.926	221.842	185.461	--	hypothetical protein JCGZ_00194 [Jatropha curcas]
	VF03018	3033	13.5112	44.9824	51.1064	44.2347	56.6435	54.2588	--	hypothetical protein JCGZ_06702 [Jatropha curcas]
	VF16719	3033	180.674	97.4486	99.4611	133.615	108.083	93.9745	Serine/threonine-protein kinase SRK2E GN=F17I5.140 OS=Arabidopsis thaliana (Mouse-ear cress) PE=1 SV=1	Kinase superfamily protein isoform 2 [Theobroma cacao]
	VF06992	3032	20.8351	14.5218	11.8385	17.4936	13.7045	10.1019	--	hypothetical protein JCGZ_00840 [Jatropha curcas]
	VF14696	3031	16.6583	11.2808	10.5795	11.31	9.65147	9.82654	--	hypothetical protein JCGZ_25729 [Jatropha curcas]
	VF20548	3031	269.466	1082.63	885.235	713.4	1006.26	1074.98	Peptidyl-prolyl cis-trans isomerase GN=PCKR1 OS=Catharanthus roseus (Madagascar periwinkle) PE=1 SV=1	cyclophilin [Momordica charantia]
	VF24159	3031	6.98341	3.58043	1.06739	3.68513	1.73432	0.937855	Protein LURP-one-related 17 GN=At5g41590 OS=Arabidopsis thaliana (Mouse-ear cress) PE=2 SV=2	conserved hypothetical protein [Ricinus communis]
	VF26528	3031	115.244	78.9877	77.2937	101.355	82.5108	63.0454	La protein 2 GN=LA2 OS=Arabidopsis thaliana (Mouse-ear cress) PE=1 SV=1	hypothetical protein JCGZ_07781 [Jatropha curcas]
	VF00219	3030	4.82396	2.68037	3.19069	3.43707	2.24533	2.26272	60S ribosomal protein L8 GN=RPL8 OS=Solanum lycopersicum (Tomato) PE=2 SV=1	unknown [Zea mays]
	VF15656	3030	32.6201	22.5091	14.9533	22.6243	18.9986	14.6018	Pectinesterase PPE8B (Precursor) OS=Prunus persica (Peach) PE=2 SV=1	hypothetical protein JCGZ_07554 [Jatropha curcas]
	VF02434	3029	28.8689	20.797	23.2434	23.0243	22.3415	18.6138	--	hypothetical protein JCGZ_10183 [Jatropha curcas]
	VF24461	3029	126.548	166.464	169.606	160.129	184.112	198.683	1,2-dihydroxy-3-keto-5-methylthiopentene dioxygenase 2 {ECO:0000255|HAMAP-Rule:MF_03154} GN=VIT_05s0020g04080 OS=Vitis vinifera (Grape) PE=3 SV=1	acireductone dioxygenase, putative [Ricinus communis]
	VF00154	3028	32.7244	17.497	17.7025	27.3569	17.85	12.7597	Mitochondrial import inner membrane translocase subunit TIM22-1 (Precursor) GN=T22K18.6 OS=Arabidopsis thaliana (Mouse-ear cress) PE=1 SV=1	hypothetical protein JCGZ_10590 [Jatropha curcas]
	VF06190	3027	5.65902	4.50774	4.11395	4.5335	4.16172	3.28341	Pentatricopeptide repeat-containing protein At3g61520, mitochondrial (Precursor) GN=At3g61520 OS=Arabidopsis thaliana (Mouse-ear cress) PE=2 SV=1	pentatricopeptide repeat-containing family protein, partial [Populus trichocarpa]
	VF08888	3027	17.1201	13.9465	12.6271	14.0544	11.7015	11.0189	B3 domain-containing transcription factor VRN1 GN=VRN1 OS=Arabidopsis thaliana (Mouse-ear cress) PE=1 SV=1	PREDICTED: B3 domain-containing transcription factor VRN1-like isoform X2 [Populus euphratica]
	VF18605	3027	27.0505	42.2512	46.284	43.8875	49.6422	50.4541	Uncharacterized protein At1g03900 OS=Arabidopsis thaliana (Mouse-ear cress) PE=2 SV=1	hypothetical protein JCGZ_17673 [Jatropha curcas]
	VF05982	3026	45.4639	35.1266	35.3944	40.83	32.5706	28.802	GRF1-interacting factor 3 GN=GIF3 OS=Arabidopsis thaliana (Mouse-ear cress) PE=1 SV=1	hypothetical protein JCGZ_20934 [Jatropha curcas]
	VF08105	3025	149.427	66.6187	32.3412	101.845	65.8221	8.15602	Growth-regulating factor 6 OS=Oryza sativa subsp. japonica (Rice) PE=2 SV=2	hypothetical protein JCGZ_15989 [Jatropha curcas]
	VFNG4527	3025	3.29413	0.539981	0.211526	1.26062	0.5026	0.344339	Ethylene-overproduction protein 1 GN=ETO1 OS=Arabidopsis thaliana (Mouse-ear cress) PE=1 SV=2	PREDICTED: ethylene-overproduction protein 1-like [Populus euphratica]
	VF02751	3023	31.0749	19.8805	17.4583	26.67	19.176	14.3986	Pentatricopeptide repeat-containing protein At1g11290 GN=T28P6.20 OS=Arabidopsis thaliana (Mouse-ear cress) PE=2 SV=1	Pentatricopeptide repeat protein 78 [Theobroma cacao]
	VF03501	3023	27.6355	15.3653	19.2469	21.8361	16.0781	13.9515	Putative phospholipid-transporting ATPase 5 GN=ALA5 OS=Arabidopsis thaliana (Mouse-ear cress) PE=3 SV=1	hypothetical protein EUTSA_v10006585mg [Eutrema salsugineum]
	VF15830	3023	5.14528	3.11302	1.96433	3.52237	1.96224	0.746475	Pentatricopeptide repeat-containing protein At4g18840 GN=PCMP-E101 OS=Arabidopsis thaliana (Mouse-ear cress) PE=3 SV=2	pentatricopeptide repeat-containing protein, putative [Ricinus communis]
	VF12415	3022	2.69473	1.63998	1.731	1.67304	1.73583	1.27998	CBL-interacting protein kinase 33 GN=CIPK33 OS=Oryza sativa subsp. japonica (Rice) PE=2 SV=1	hypothetical protein POPTR_0001s23030g [Populus trichocarpa]
	VF15902	3022	129.094	352.526	418.851	276.008	359.341	558.531	Auxin-repressed 12.5 kDa protein OS=Fragaria ananassa (Strawberry) PE=2 SV=1	conserved hypothetical protein [Ricinus communis]
	VF25042	3022	64.4783	35.6213	33.5374	47.8863	37.0253	33.278	--	hypothetical protein JCGZ_11293 [Jatropha curcas]
	VF22380	3021	18.2435	9.79323	8.59938	12.893	10.7047	8.74037	--	hypothetical protein JCGZ_06368 [Jatropha curcas]
	VF27276	3021	25.2527	13.0804	10.1165	12.2423	11.2059	8.97244	Transcription factor bHLH122 GN=F23H24.3 OS=Arabidopsis thaliana (Mouse-ear cress) PE=1 SV=1	DNA binding protein, putative [Ricinus communis]
	VF04425	3019	50.7623	23.1746	21.3977	35.5862	25.5272	20.7739	#N/A	#N/A
	VF24749	3018	11.7212	4.32293	5.11998	6.55884	4.8036	4.61123	#N/A	#N/A
	VF03047	3016	22.8956	17.4762	15.3664	17.6086	15.1841	11.4039	Cysteine-rich receptor-like protein kinase 42 (Precursor) GN=CRK42 OS=Arabidopsis thaliana (Mouse-ear cress) PE=2 SV=1	PREDICTED: cysteine-rich receptor-like protein kinase 2 isoform X2 [Populus euphratica]
	VF03510	3016	48.5295	30.3544	29.2563	40.9162	33.5998	25.5027	Heterogeneous nuclear ribonucleoprotein 1 GN=RNP1 OS=Arabidopsis thaliana (Mouse-ear cress) PE=1 SV=1	hypothetical protein JCGZ_24754 [Jatropha curcas]
	VF03861	3016	36.328	22.3747	20.0538	22.6495	20.8919	19.5606	--	hypothetical protein JCGZ_00600 [Jatropha curcas]
	VF09415	3016	24.0644	16.5974	14.8084	20.1907	17.6655	12.4344	Alkaline/neutral invertase C, mitochondrial {ECO:0000305} (Precursor) OS=Arabidopsis thaliana (Mouse-ear cress) PE=1 SV=1	neutral/alkaline invertase [Manihot esculenta]
	VF11850	3015	82.2048	64.1573	64.8423	72.2931	68.728	62.7837	Histone-lysine N-methyltransferase ATX2 GN=T20M3.10 OS=Arabidopsis thaliana (Mouse-ear cress) PE=2 SV=1	hypothetical protein JCGZ_07095 [Jatropha curcas]
	VF14831	3015	93.2541	322.224	389.545	271.763	304.2	374.959	--	hypothetical protein CISIN_1g034294mg [Citrus sinensis]
	VF17459	3015	21.4506	37.7697	34.1196	33.2715	32.6798	39.5751	--	hypothetical protein JCGZ_08633 [Jatropha curcas]
	VF21359	3015	48.6391	21.1099	18.9894	36.0164	21.0559	16.6315	Ribonucleoside-diphosphate reductase small chain A GN=MDB19.6 OS=Arabidopsis thaliana (Mouse-ear cress) PE=1 SV=2	ribonucleoside-diphosphate reductase small chain, putative [Ricinus communis]
	VF07971	3013	27.6036	0.0470811	0.115282	8.54993	0.113439	3.44454e-08	--	hypothetical protein JCGZ_00933 [Jatropha curcas]
	VF23058	3013	6.53808	2.94301	3.38046	3.61405	1.89948	0.811805	Pentatricopeptide repeat-containing protein At3g28660 GN=PCMP-E80 OS=Arabidopsis thaliana (Mouse-ear cress) PE=2 SV=1	pentatricopeptide repeat-containing protein, putative [Ricinus communis]
	VFNG4522	3013	7.67777	3.03382	2.07223	2.40278	1.12834	0.148816	Cytochrome P450 734A1 GN=F18A8.8 OS=Arabidopsis thaliana (Mouse-ear cress) PE=2 SV=1	hypothetical protein JCGZ_13283 [Jatropha curcas]
	VF00844	3012	60.7789	46.9742	50.3868	53.2643	51.149	46.4362	--	hypothetical protein JCGZ_25254 [Jatropha curcas]
	VF06347	3011	101.296	52.5989	49.6228	66.4677	56.2184	51.1112	Vacuolar protein sorting-associated protein 26A GN=VPS26A OS=Arabidopsis thaliana (Mouse-ear cress) PE=2 SV=1	vacuolar protein sorting 26, vps26, putative [Ricinus communis]
	VF19997	3011	68.1706	32.1188	33.8085	47.8458	39.4223	30.9268	--	hypothetical protein JCGZ_17024 [Jatropha curcas]
	VF21361	3011	7.63248	4.60276	3.67168	5.27286	5.10651	3.67217	Pentatricopeptide repeat-containing protein At5g19020, mitochondrial (Precursor) GN=PCMP-E42 OS=Arabidopsis thaliana (Mouse-ear cress) PE=2 SV=1	hypothetical protein JCGZ_02092 [Jatropha curcas]
	VF02262	3010	23.3636	28.4199	30.2956	28.1986	29.5926	33.9309	2-hydroxyacyl-CoA lyase GN=T10B6.40 OS=Arabidopsis thaliana (Mouse-ear cress) PE=1 SV=1	hypothetical protein JCGZ_13058 [Jatropha curcas]
	VF27560	3010	13.3311	27.6462	28.6137	24.0414	31.4523	41.1182	Protein transport protein SEC13 homolog B {ECO:0000305} OS=Arabidopsis thaliana (Mouse-ear cress) PE=1 SV=1	hypothetical protein JCGZ_20869 [Jatropha curcas]
	VF01498	3009	51.6132	37.0252	35.6765	37.685	31.8206	33.1767	--	hypothetical protein JCGZ_13874 [Jatropha curcas]
	VF01673	3009	29.0357	19.6207	19.5497	20.5995	20.4745	18.6713	mRNA-decapping enzyme-like protein GN=At1g08370 OS=Arabidopsis thaliana (Mouse-ear cress) PE=1 SV=2	hypothetical protein JCGZ_13561 [Jatropha curcas]
	VF18925	3009	4.41822	2.1034	1.89216	2.64107	2.76047	1.60646	#N/A	#N/A
	VF27813	3009	170.179	354.893	356.589	334.529	364.312	368.219	60S ribosomal protein L44 GN=RPL44 OS=Gossypium hirsutum (Upland cotton) PE=3 SV=3	unnamed protein product [Vitis vinifera]
	VF15097	3008	43.9471	28.4638	29.5038	38.0161	30.0552	26.2899	Actin-related protein 9 GN=ARP9 OS=Arabidopsis thaliana (Mouse-ear cress) PE=2 SV=1	hypothetical protein JCGZ_02297 [Jatropha curcas]
	VF04894	3007	71.1363	47.3341	33.9142	46.262	38.863	35.1212	Uncharacterized protein ycf19 GN=ycf19 OS=Guillardia theta (Cryptomonas phi) PE=3 SV=1	hypothetical protein JCGZ_07597 [Jatropha curcas]
	VF11476	3007	22.7739	12.5282	13.8429	18.4575	15.1383	11.1524	Helicase protein MOM1 GN=T6D22.14 OS=Arabidopsis thaliana (Mouse-ear cress) PE=1 SV=1	hypothetical protein JCGZ_22912 [Jatropha curcas]
	VFNG3289	3007	6.86696	3.56901	1.23841	4.41131	2.34631	1.1945	#N/A	#N/A
	VF16129	3005	70.215	126.953	118.314	115.873	133.926	130.284	Sec-independent protein translocase protein TATA, chloroplastic (Precursor) GN=TATA OS=Pisum sativum (Garden pea) PE=1 SV=1	hypothetical protein JCGZ_23495 [Jatropha curcas]
	VF25855	3004	19.9878	10.9743	10.5736	16.1276	11.5864	9.6718	Serine/threonine-protein kinase AFC1 GN=F4P12_270 OS=Arabidopsis thaliana (Mouse-ear cress) PE=2 SV=2	ATP binding protein, putative [Ricinus communis]
	VFNG5600	3004	9.30544	0.966006	0.769187	4.40546	1.23256	0.764411	Putative pentatricopeptide repeat-containing protein At3g23330 GN=PCMP-H32 OS=Arabidopsis thaliana (Mouse-ear cress) PE=3 SV=1	PREDICTED: putative pentatricopeptide repeat-containing protein At3g23330 [Vitis vinifera]
	VF16662	3003	28.7144	19.5584	21.5568	24.3527	22.1819	19.026	Constitutive photomorphogenesis protein 10 GN=COP10 OS=Arabidopsis thaliana (Mouse-ear cress) PE=1 SV=1	ubiquitin-conjugating enzyme E2, putative [Ricinus communis]
	VF28179	3003	2.97317	1.89298	1.81006	2.59895	1.77094	1.36448	Pentatricopeptide repeat-containing protein At4g35130, chloroplastic (Precursor) GN=PCMP-H27 OS=Arabidopsis thaliana (Mouse-ear cress) PE=3 SV=1	pentatricopeptide repeat-containing protein, putative [Ricinus communis]
	VF10368	3001	7.66934	3.78118	4.49761	5.32441	3.43036	3.72025	Protein WALLS ARE THIN 1 GN=WAT1 OS=Arabidopsis thaliana (Mouse-ear cress) PE=1 SV=1	hypothetical protein JCGZ_13668 [Jatropha curcas]
	VF22781	3001	291.882	13.1777	8.66242	134.116	6.82909	3.43252	--	hypothetical protein JCGZ_04823 [Jatropha curcas]
	VF04295	3000	32.3199	17.0834	14.4855	22.2268	15.1725	15.5509	Ribonuclease E/G-like protein, chloroplastic (Precursor) GN=T23O15.10 OS=Arabidopsis thaliana (Mouse-ear cress) PE=1 SV=1	hypothetical protein JCGZ_01727 [Jatropha curcas]
	VF21000	3000	7.63385	4.17081	4.25443	4.73819	4.61583	4.02277	Pentatricopeptide repeat-containing protein At5g01110 GN=At5g01110 OS=Arabidopsis thaliana (Mouse-ear cress) PE=2 SV=1	PREDICTED: pentatricopeptide repeat-containing protein At5g01110-like [Populus euphratica]
	VF27371	3000	22.0303	42.0767	47.0559	31.7743	39.4308	49.3207	Peroxisomal 2,4-dienoyl-CoA reductase GN=At3g12800 OS=Arabidopsis thaliana (Mouse-ear cress) PE=2 SV=1	hypothetical protein JCGZ_22605 [Jatropha curcas]
	VF27953	2999	36.8424	7.87512	7.36073	17.6356	7.78932	7.825	--	hypothetical protein JCGZ_07173 [Jatropha curcas]
	VF09003	2998	82.2818	158.836	198.915	155.141	191.98	253.563	Cytochrome c OS=Gossypium barbadense (Sea-island cotton) PE=1 SV=1	PREDICTED: cytochrome c [Nicotiana sylvestris]
	VF11576	2998	9.3546	18.0438	17.1551	12.7064	16.3341	19.2766	CDPK-related kinase 3 GN=T3A4.8 OS=Arabidopsis thaliana (Mouse-ear cress) PE=1 SV=1	hypothetical protein JCGZ_14206 [Jatropha curcas]
	VF16066	2998	17.0143	12.244	12.6026	12.8339	13.2656	11.4889	--	hypothetical protein JCGZ_23439 [Jatropha curcas]
	VFNG5747	2997	97.7532	24.6332	24.865	46.3901	29.2532	25.7609	Zinc finger BED domain-containing protein RICESLEEPER 2 OS=Oryza sativa subsp. japonica (Rice) PE=2 SV=1	PREDICTED: zinc finger BED domain-containing protein RICESLEEPER 1-like, partial [Nicotiana sylvestris]
	VF09881	2996	51.0318	188.934	204.137	120.693	152.37	223.293	Anaphase-promoting complex subunit 11 GN=APC11 OS=Arabidopsis thaliana (Mouse-ear cress) PE=1 SV=2	ring finger, putative [Ricinus communis]
	VF04369	2995	38.8103	6.50525	9.74345	10.3649	10.7402	3.28475	#N/A	#N/A
	VF11074	2995	117.946	76.4393	75.7672	102.173	73.5206	67.3185	Phosphoribosyl-ATP pyrophosphatase (Precursor) GN=HISN2 OS=Arabidopsis thaliana (Mouse-ear cress) PE=1 SV=1	hypothetical protein JCGZ_26891 [Jatropha curcas]
	VF11937	2995	40.3753	55.9245	60.12	54.3846	52.9943	65.69	Ras-related protein RABA1f GN=RABA1F OS=Arabidopsis thaliana (Mouse-ear cress) PE=2 SV=1	hypothetical protein JCGZ_09827 [Jatropha curcas]
	VF11951	2995	242.04	74.3141	29.7905	108.653	103.206	35.5609	--	conserved hypothetical protein [Ricinus communis]
	VF18376	2995	32.0148	26.1441	27.3423	26.7092	26.4349	24.7905	--	unnamed protein product [Vitis vinifera]
	VF25027	2995	15.3931	24.4381	25.3776	19.1609	24.2121	26.2191	--	hypothetical protein JCGZ_11309 [Jatropha curcas]
	VF23496	2994	6.16035	4.47302	3.90766	5.37481	3.95805	3.0175	Pentatricopeptide repeat-containing protein At1g07590, mitochondrial (Precursor) GN=At1g07590 OS=Arabidopsis thaliana (Mouse-ear cress) PE=2 SV=1	PREDICTED: pentatricopeptide repeat-containing protein At1g07590, mitochondrial isoform X1 [Populus euphratica]
	VF00723	2993	52.4441	34.4245	40.5005	41.2571	33.063	29.9391	B3 domain-containing protein Os01g0234100 OS=Oryza sativa subsp. japonica (Rice) PE=2 SV=1	hypothetical protein JCGZ_12378 [Jatropha curcas]
	VF27932	2993	10.42	5.44353	6.52517	6.17058	5.60399	4.92612	--	Structural maintenance of chromosome, putative [Ricinus communis]
	VF10394	2992	18.621	12.326	12.5591	12.0934	11.3607	9.3889	--	conserved hypothetical protein [Ricinus communis]
	VF19592	2992	38.0675	25.7544	24.4489	28.8613	28.4295	24.5171	Probable WRKY transcription factor 39 GN=WRKY39 OS=Arabidopsis thaliana (Mouse-ear cress) PE=2 SV=1	WRKY transcription factor, putative [Ricinus communis]
	VF24240	2992	25.5849	19.0861	17.2503	22.5547	17.4746	13.4057	Probable S-adenosylmethionine carrier 2, chloroplastic (Precursor) GN=SAMC2 OS=Arabidopsis thaliana (Mouse-ear cress) PE=2 SV=1	hypothetical protein JCGZ_20590 [Jatropha curcas]
	VF11215	2991	2.9084	1.83581	1.26418	1.66281	1.67746	1.0887	#N/A	#N/A
	VF20654	2991	38.2742	21.9122	12.4217	28.484	13.1162	6.61829	Uncharacterized protein At4g22758 GN=At4g22758 OS=Arabidopsis thaliana (Mouse-ear cress) PE=2 SV=1	hypothetical protein JCGZ_20741 [Jatropha curcas]
	VF25397	2991	34.5249	14.2825	12.7755	15.0237	10.0749	10.7916	--	hypothetical protein POPTR_0005s17030g [Populus trichocarpa]
	VF14822	2990	1.75715	1.16746	1.32185	1.40684	1.14292	0.866154	Pentatricopeptide repeat-containing protein At1g03540 GN=PCMP-E4 OS=Arabidopsis thaliana (Mouse-ear cress) PE=2 SV=1	hypothetical protein JCGZ_25836 [Jatropha curcas]
	VF16522	2990	18.0419	14.5169	15.6085	15.3749	15.0223	13.4549	Probable LRR receptor-like serine/threonine-protein kinase At1g56130 (Precursor) GN=At1g56130 OS=Arabidopsis thaliana (Mouse-ear cress) PE=2 SV=2	hypothetical protein JCGZ_08587 [Jatropha curcas]
	VF27427	2990	66.8052	45.0125	32.1718	41.7098	41.3126	28.8693	Putative disease resistance protein RGA1 GN=RGA1 OS=Solanum bulbocastanum (Wild potato) PE=2 SV=2	hypothetical protein JCGZ_00277 [Jatropha curcas]
	VFNG5673	2990	6.17067	4.55345	3.56353	4.83904	3.99222	3.75245	Coatomer subunit beta&apos;-2 GN=At1g52360 OS=Arabidopsis thaliana (Mouse-ear cress) PE=2 SV=1	coatomer subunit beta&apos;-2 [Arabidopsis thaliana]
	VF02439	2989	8.74621	4.5852	3.15652	5.1585	5.14583	3.19571	Prohibitin-3, mitochondrial GN=K1B16.2 OS=Arabidopsis thaliana (Mouse-ear cress) PE=1 SV=1	hypothetical protein JCGZ_10177 [Jatropha curcas]
	VF23452	2989	39.0556	30.5511	25.1602	28.692	27.8113	23.3627	--	hypothetical protein JCGZ_08624 [Jatropha curcas]
	VF16847	2987	55.8629	39.7961	42.2497	50.192	42.2231	34.5032	--	hypothetical protein JCGZ_22852 [Jatropha curcas]
	VF16941	2986	15.8626	5.47885	9.26523	9.34914	7.35367	5.14362	Protein LOL2 GN=LOL2 OS=Arabidopsis thaliana (Mouse-ear cress) PE=1 SV=1	hypothetical protein CICLE_v10017149mg [Citrus clementina]
	VF23907	2986	26.3789	12.4826	10.439	15.8371	11.0475	11.6559	30S ribosomal protein S1, chloroplastic (Precursor) GN=RPS1 OS=Spinacia oleracea (Spinach) PE=1 SV=1	hypothetical protein JCGZ_13115 [Jatropha curcas]
	VFNG1967	2986	24.7162	50.1761	42.5369	44.6964	49.902	57.2925	Probable phytol kinase 3, chloroplastic (Precursor) OS=Glycine max (Soybean) PE=2 SV=1	hypothetical protein JCGZ_17344 [Jatropha curcas]
	VF11862	2985	8.24202	4.35042	4.90349	5.97289	5.74853	3.1266	--	hypothetical protein JCGZ_07108 [Jatropha curcas]
	VF28127	2985	2.4919	1.66128	1.6902	2.16615	1.4368	1.3491	Putative pentatricopeptide repeat-containing protein At5g06400, mitochondrial (Precursor) GN=At5g06400 OS=Arabidopsis thaliana (Mouse-ear cress) PE=3 SV=1	hypothetical protein JCGZ_08725 [Jatropha curcas]
	VF07534	2984	55.4623	39.0247	34.3235	43.2165	39.3949	36.3334	--	hypothetical protein JCGZ_25545 [Jatropha curcas]
	VF24323	2984	46.203	54.9205	59.1845	50.5981	57.7977	62.2816	Probable sugar phosphate/phosphate translocator At3g17430 GN=At3g17430 OS=Arabidopsis thaliana (Mouse-ear cress) PE=1 SV=1	phosphate translocator-related family protein [Populus trichocarpa]
	VFNG2530	2984	5.1332	3.13219	1.94584	3.76183	2.99585	1.90375	#N/A	#N/A
	VF19591	2983	167.109	98.7848	105.652	127.935	108.425	101.736	Signal recognition particle 9 kDa protein GN=SRP9 OS=Arabidopsis thaliana (Mouse-ear cress) PE=3 SV=1	PREDICTED: signal recognition particle 9 kDa protein [Populus euphratica]
	VF13966	2982	137.446	86.173	99.8698	117.331	86.9014	76.6344	Ribosome production factor 2 homolog GN=At3g23620 OS=Arabidopsis thaliana (Mouse-ear cress) PE=2 SV=1	hypothetical protein JCGZ_06743 [Jatropha curcas]
	VFNG2236	2982	7.46929	3.45233	3.01141	5.14396	4.25286	3.02933	Uncharacterized mitochondrial protein AtMg00860 GN=AtMg00860 OS=Arabidopsis thaliana (Mouse-ear cress) PE=4 SV=1	Retrotransposon protein, putative [Theobroma cacao]
	VF23333	2981	8.80885e-05	5.85284	4.0325	3.75287	4.01588	6.18538	Exocyst complex component SEC15A GN=SEC15A OS=Arabidopsis thaliana (Mouse-ear cress) PE=3 SV=2	hypothetical protein JCGZ_26524 [Jatropha curcas]
	VF05269	2980	104.765	66.5263	67.1211	76.5435	66.4246	67.5778	Ubiquitin-conjugating enzyme E2 2 GN=UBC2 OS=Arabidopsis thaliana (Mouse-ear cress) PE=2 SV=1	ubiquitin-conjugating enzyme [Medicago truncatula]
	VF16459	2980	43.5476	26.9003	26.2492	34.0797	30.5194	26.1617	DDB1- and CUL4-associated factor homolog 1 GN=DCAF1 OS=Arabidopsis thaliana (Mouse-ear cress) PE=1 SV=2	conserved hypothetical protein [Ricinus communis]
	VF08785	2979	1.95565	1.2347	1.06625	1.13901	1.22245	0.766504	Pentatricopeptide repeat-containing protein At5g55740, chloroplastic (Precursor) GN=MDF20.18 OS=Arabidopsis thaliana (Mouse-ear cress) PE=2 SV=1	hypothetical protein JCGZ_13262 [Jatropha curcas]
	VF22664	2979	58.4109	35.4823	32.1709	43.7174	38.0368	33.8469	--	hypothetical protein JCGZ_25378 [Jatropha curcas]
	VF18714	2978	12.9355	20.8269	22.8875	16.1739	21.3626	26.6396	--	hypothetical protein JCGZ_12411 [Jatropha curcas]
	VF03677	2977	9.3837	4.53824	4.27906	7.33416	4.84804	3.9525	--	hypothetical protein JCGZ_00670 [Jatropha curcas]
	VF07979	2977	9.95757	17.7438	17.5157	13.6643	16.6736	17.9751	--	hypothetical protein JCGZ_00944 [Jatropha curcas]
	VF16961	2977	1.11664	12.823	12.3136	9.01957	15.5581	13.6766	Eukaryotic translation initiation factor 3 subunit D {ECO:0000255|HAMAP-Rule:MF_03003} GN=TIF3D1 OS=Arabidopsis thaliana (Mouse-ear cress) PE=1 SV=1	eukaryotic translation initiation factor 3 subunit, putative [Ricinus communis]
	VF00103	2976	55.4624	28.1643	33.8249	39.3247	30.2522	30.0066	--	hypothetical protein JCGZ_02573 [Jatropha curcas]
	VF02307	2976	16.9854	8.62298	9.39915	10.1661	7.98847	8.50996	Protein trichome birefringence-like 12 GN=TBL12 OS=Arabidopsis thaliana (Mouse-ear cress) PE=2 SV=1	PREDICTED: protein trichome birefringence-like 12 isoform X1 [Vitis vinifera]
	VF15569	2976	13.026	10.3781	10.0039	11.2113	9.76654	7.68803	Zinc finger CCCH domain-containing protein 64 GN=At5g56900 OS=Arabidopsis thaliana (Mouse-ear cress) PE=2 SV=1	hypothetical protein JCGZ_07409 [Jatropha curcas]
	VF01652	2975	34.6667	16.2157	14.422	24.3747	19.32	14.9205	Mediator of RNA polymerase II transcription subunit 17 GN=F5O24.60 OS=Arabidopsis thaliana (Mouse-ear cress) PE=1 SV=1	hypothetical protein JCGZ_13306 [Jatropha curcas]
	VF19589	2975	7.55749	4.46048	3.5968	6.09828	3.45326	3.30708	Potassium channel SKOR GN=SKOR OS=Arabidopsis thaliana (Mouse-ear cress) PE=1 SV=1	hypothetical protein POPTR_0005s24070g, partial [Populus trichocarpa]
	VF21944	2974	73.7355	124.735	137.544	92.6874	127.967	151.053	14-3-3-like protein GF14 kappa GN=GRF8 OS=Arabidopsis thaliana (Mouse-ear cress) PE=1 SV=2	hypothetical protein JCGZ_18684 [Jatropha curcas]
	VF07284	2973	63.1064	29.2248	32.2121	40.7149	37.6615	29.9351	--	hypothetical protein JCGZ_21430 [Jatropha curcas]
	VF14701	2973	17.0929	10.0218	11.0079	10.7938	9.75639	9.40612	--	interferon-induced guanylate-binding protein, putative [Ricinus communis]
	VF09495	2972	16.1065	6.99032	4.10445	8.59626	5.37527	5.41161	PsbP-like protein 2, chloroplastic (Precursor) GN=F12L6.13 OS=Arabidopsis thaliana (Mouse-ear cress) PE=1 SV=2	hypothetical protein JCGZ_08399 [Jatropha curcas]
	VF07494	2971	11.2866	23.1093	22.3888	16.446	20.0717	24.2019	#N/A	#N/A
	VF09177	2971	18.3727	11.5719	11.3324	12.7327	12.1612	11.4302	Leucine-rich repeat receptor-like protein kinase PXL1 (Precursor) GN=PXL1 OS=Arabidopsis thaliana (Mouse-ear cress) PE=2 SV=1	Brassinosteroid LRR receptor kinase precursor, putative [Ricinus communis]
	VF28293	2971	434.767	817.019	1028.38	840.762	868.062	1006.88	ATP synthase subunit epsilon, mitochondrial OS=Ipomoea batatas (Sweet potato) PE=1 SV=2	PREDICTED: ATP synthase subunit epsilon, mitochondrial [Cucumis melo]
	VF03056	2970	11.4263	3.24539	2.34885	7.00885	3.234	2.61858	Fasciclin-like arabinogalactan protein 21 (Precursor) GN=FLA21 OS=Arabidopsis thaliana (Mouse-ear cress) PE=2 SV=1	hypothetical protein JCGZ_13829 [Jatropha curcas]
	VF08441	2970	57.7543	111.184	115.448	84.7702	96.6252	120.337	L-ascorbate peroxidase T, chloroplastic (Precursor) GN=APXT OS=Arabidopsis thaliana (Mouse-ear cress) PE=2 SV=2	hypothetical protein JCGZ_12140 [Jatropha curcas]
	VF16425	2970	7.33186	11.5339	11.925	9.50022	10.492	13.9244	--	hypothetical protein JCGZ_07025 [Jatropha curcas]
	VF26574	2970	2.50288	0.916328	0.808194	1.29527	1.20587	0.861571	Probable polygalacturonase At3g15720 (Precursor) GN=At3g15720 OS=Arabidopsis thaliana (Mouse-ear cress) PE=1 SV=1	hypothetical protein JCGZ_19407 [Jatropha curcas]
	VF03359	2969	10.7605	6.63261	6.79062	8.96642	6.76952	6.40061	--	PREDICTED: uncharacterized protein LOC105118021 [Populus euphratica]
	VF21481	2969	86.9769	139.137	159.124	126.244	151.699	200.169	Peptidyl-prolyl cis-trans isomerase GN=PCKR1 OS=Catharanthus roseus (Madagascar periwinkle) PE=1 SV=1	hypothetical protein JCGZ_08206 [Jatropha curcas]
	VF24971	2969	2.24079	3.76139	3.67741	3.56598	3.8863	3.82222	Haloacid dehalogenase-like hydrolase domain-containing protein At3g48420 (Precursor) GN=At3g48420 OS=Arabidopsis thaliana (Mouse-ear cress) PE=2 SV=1	hypothetical protein JCGZ_11363 [Jatropha curcas]
	VF27465	2969	5.14837	3.58274	2.44492	4.12757	3.01055	2.16208	Extra-large guanine nucleotide-binding protein 1 GN=F26B6.11 OS=Arabidopsis thaliana (Mouse-ear cress) PE=1 SV=2	hypothetical protein JCGZ_10031 [Jatropha curcas]
	VFNG324	2969	20.095	13.4502	13.873	15.3612	14.0697	13.793	--	PREDICTED: uncharacterized protein LOC104903750 [Beta vulgaris subsp. vulgaris]
	VF11771	2968	4.66882	2.12	1.08126	3.26057	2.31882	0.937586	--	PREDICTED: protein FAM32A-like [Populus euphratica]
	VF14930	2968	28.0891	19.5493	21.4582	24.9376	19.1311	17.6599	Phosphatidylinositol 4-kinase gamma 3 GN=PI4KG3 OS=Arabidopsis thaliana (Mouse-ear cress) PE=2 SV=1	hypothetical protein POPTR_0012s02180g [Populus trichocarpa]
	VF17799	2968	48.722	78.6082	67.715	62.5715	76.3342	83.0193	30S ribosomal protein S9, chloroplastic (Precursor) GN=RPS9 OS=Arabidopsis thaliana (Mouse-ear cress) PE=2 SV=1	hypothetical protein JCGZ_04376 [Jatropha curcas]
	VF24606	2968	25.1361	17.7462	17.8194	17.6085	16.9827	15.9884	Trihelix transcription factor GT-1 GN=GT-1 OS=Arabidopsis thaliana (Mouse-ear cress) PE=1 SV=1	hypothetical protein JCGZ_17910 [Jatropha curcas]
	VF25994	2967	14.572	9.29967	5.01825	9.66338	7.6099	3.49778	Probable 2-oxoglutarate-dependent dioxygenase AOP1 GN=T4I9.5 OS=Arabidopsis thaliana (Mouse-ear cress) PE=2 SV=1	hypothetical protein POPTR_0001s17670g [Populus trichocarpa]
	VF02423	2966	28.114	19.1909	18.339	24.6312	20.3611	14.0453	DEAD-box ATP-dependent RNA helicase 17 GN=RH17 OS=Arabidopsis thaliana (Mouse-ear cress) PE=2 SV=1	hypothetical protein JCGZ_10192 [Jatropha curcas]
	VF08687	2966	36.6785	53.3028	63.1557	47.7173	59.2777	62.0466	26S proteasome non-ATPase regulatory subunit 4 homolog OS=Arabidopsis thaliana (Mouse-ear cress) PE=1 SV=1	hypothetical protein JCGZ_18794 [Jatropha curcas]
	VF11648	2966	11.1287	6.67354	6.41272	7.12968	6.76598	6.42349	--	hypothetical protein JCGZ_14135 [Jatropha curcas]
	VF18127	2966	133.659	76.5413	39.1242	89.7375	72.5526	32.8408	#N/A	#N/A
	VF22492	2966	37.396	26.274	27.6166	26.8389	26.1836	24.2861	--	hypothetical protein JCGZ_17558 [Jatropha curcas]
	VF09651	2965	63.4513	37.2657	38.0895	47.1908	44.5116	36.9924	--	hypothetical protein JCGZ_10171 [Jatropha curcas]
	VF24279	2965	47.1474	27.2199	27.8782	34.6009	28.3188	28.2285	Calmodulin OS=Heterocapsa triquetra (Dinoflagellate) PE=2 SV=1	hypothetical protein JCGZ_15635 [Jatropha curcas]
	VF24764	2965	14.2605	7.26307	4.91235	6.15782	3.26234	2.92862	--	hypothetical protein JCGZ_18041 [Jatropha curcas]
	VF00564	2964	13.9512	9.41203	6.65245	11.3306	7.03201	5.56986	--	hypothetical protein JCGZ_17441 [Jatropha curcas]
	VF08623	2964	76.0819	44.8779	52.8381	59.2552	46.1843	46.3071	Biotin carboxyl carrier protein of acetyl-CoA carboxylase 2, chloroplastic (Precursor) GN=BCCP2 OS=Arabidopsis thaliana (Mouse-ear cress) PE=2 SV=1	hypothetical protein JCGZ_06178 [Jatropha curcas]
	VFNG4792	2964	7.81475	5.15888	4.39123	5.93778	5.50411	2.95684	Probable mitochondrial-processing peptidase subunit beta (Precursor) GN=At3g02090 OS=Arabidopsis thaliana (Mouse-ear cress) PE=2 SV=2	Putative mitochondrial-processing peptidase subunit beta [Glycine soja]
	VF06725	2963	17.466	13.3887	10.384	12.6543	11.8134	8.59945	--	hypothetical protein JCGZ_06202 [Jatropha curcas]
	VF09278	2963	118.001	45.6348	48.5617	86.7027	45.3727	41.4075	--	hypothetical protein JCGZ_18931 [Jatropha curcas]
	VF00495	2962	49.9811	29.3516	23.4617	37.9281	27.7163	8.81201	#N/A	#N/A
	VF19976	2962	22.0432	18.6309	15.9893	18.9638	16.0714	15.7375	#N/A	#N/A
	VF26451	2962	45.7016	27.6526	19.251	36.7333	26.4403	16.1961	#N/A	#N/A
	VFNG5524	2962	2.2815	0.634149	0.938767	1.32702	0.713568	0.754753	Nuclear pore complex protein NUP98A {ECO:0000303|PubMed:21189294} OS=Arabidopsis thaliana (Mouse-ear cress) PE=1 SV=1	RNA binding protein, putative [Ricinus communis]
	VF04416	2961	11.3455	17.6947	17.8325	17.8878	17.1014	19.6146	Probable CCR4-associated factor 1 homolog 11 GN=CAF1-11 OS=Arabidopsis thaliana (Mouse-ear cress) PE=2 SV=1	hypothetical protein JCGZ_08787 [Jatropha curcas]
	VF14501	2961	371.142	10.6968	5.92615	161.926	43.6638	17.7114	Non-specific lipid-transfer protein 8 (Precursor) GN=LTP8 OS=Arabidopsis thaliana (Mouse-ear cress) PE=3 SV=1	Nonspecific lipid-transfer protein precursor, putative [Ricinus communis]
	VF24471	2961	56.3043	24.9252	26.6604	41.4583	32.3629	24.031	Mitogen-activated protein kinase kinase kinase YODA GN=YDA OS=Arabidopsis thaliana (Mouse-ear cress) PE=1 SV=1	hypothetical protein JCGZ_02239 [Jatropha curcas]
	VF03314	2960	41.7366	39.1078	38.4646	39.3639	37.2801	36.6217	--	hypothetical protein JCGZ_06612 [Jatropha curcas]
	VF10299	2960	67.2331	42.7537	37.4582	44.7916	43.4689	39.1048	--	hypothetical protein JCGZ_20662 [Jatropha curcas]
	VF01382	2959	13.5322	7.46626	7.90054	11.6	7.14084	4.70075	--	hypothetical protein JCGZ_26962 [Jatropha curcas]
	VF03952	2959	5.53973	2.98462	2.47347	2.9743	1.98066	2.29778	1-acyl-sn-glycerol-3-phosphate acyltransferase OS=Cocos nucifera (Coconut palm) PE=1 SV=1	hypothetical protein JCGZ_00879 [Jatropha curcas]
	VF04332	2959	32.4156	21.7108	20.8792	26.9046	24.6259	20.0938	--	hypothetical protein JCGZ_23690 [Jatropha curcas]
	VF19259	2959	75.5928	39.3566	39.4579	52.3979	42.3075	40.8325	Purple acid phosphatase 4 (Precursor) GN=PAP4 OS=Arabidopsis thaliana (Mouse-ear cress) PE=2 SV=1	hypothetical protein POPTR_0008s13870g [Populus trichocarpa]
	VFNG5441	2959	28.3081	13.2195	15.2849	15.4159	14.4815	12.8239	--	PREDICTED: uncharacterized protein LOC103632415 isoform X1 [Zea mays]
	VF14261	2958	11.3023	1.59076	0.908336	6.53704	1.54587	0.893902	Zinc finger CCCH domain-containing protein 62 GN=ZFWD4 OS=Arabidopsis thaliana (Mouse-ear cress) PE=2 SV=1	hypothetical protein JCGZ_24491 [Jatropha curcas]
	VF27969	2958	24.2269	16.7324	15.6198	18.3889	17.3432	16.4125	--	hypothetical protein JCGZ_07186 [Jatropha curcas]
	VF03366	2956	35.8663	21.5466	21.9579	27.8076	23.4884	22.0719	Autophagy-related protein 18b GN=ATG18B OS=Arabidopsis thaliana (Mouse-ear cress) PE=2 SV=2	PREDICTED: autophagy-related protein 18b [Populus euphratica]
	VF08903	2956	183.431	20.2967	20.4509	70.8219	53.7978	24.7085	--	hypothetical protein JCGZ_04018 [Jatropha curcas]
	VF12119	2956	45.9864	32.7827	35.0405	35.7557	36.1231	32.471	Actin-related protein 2/3 complex subunit 2A GN=T17H7.13 OS=Arabidopsis thaliana (Mouse-ear cress) PE=1 SV=1	hypothetical protein JCGZ_09200 [Jatropha curcas]
	VF23159	2956	3.02056	1.54753	0.387918	1.9201	0.628974	0.0956755	Probable inactive receptor kinase At2g26730 (Precursor) GN=At2g26730 OS=Arabidopsis thaliana (Mouse-ear cress) PE=1 SV=1	hypothetical protein JCGZ_21193 [Jatropha curcas]
	VFNG4845	2956	4.36347	2.90604	2.87363	3.80176	2.78607	1.91394	Pentatricopeptide repeat-containing protein At4g21300 GN=PCMP-E36 OS=Arabidopsis thaliana (Mouse-ear cress) PE=3 SV=1	hypothetical protein JCGZ_09141 [Jatropha curcas]
	VF05786	2955	4.17883	1.41198	1.07644	2.30381	1.11586	1.34689	Elongation factor 1-alpha GN=TEF1 OS=Triticum aestivum (Wheat) PE=2 SV=1	hypothetical protein JCGZ_16471 [Jatropha curcas]
	VF08851	2955	51.3662	36.5191	26.7323	37.0393	35.7321	25.0835	#N/A	#N/A
	VF13279	2955	23.9473	18.5777	17.7677	22.0647	18.9536	16.0563	Poly(ADP-ribose) glycohydrolase 1 GN=F20M17.9 OS=Arabidopsis thaliana (Mouse-ear cress) PE=1 SV=2	hypothetical protein JCGZ_19255 [Jatropha curcas]
	VF01231	2954	18.4063	0.0180392	0.119762	6.83321	0.303516	0.811513	Probable LRR receptor-like serine/threonine-protein kinase At3g47570 (Precursor) GN=At3g47570 OS=Arabidopsis thaliana (Mouse-ear cress) PE=2 SV=1	hypothetical protein JCGZ_11090 [Jatropha curcas]
	VF24692	2954	178.424	338.322	363.029	234.937	327.908	400.518	Nuclear transport factor 2 GN=NTF2 OS=Arabidopsis thaliana (Mouse-ear cress) PE=1 SV=1	PREDICTED: nuclear transport factor 2-like [Sesamum indicum]
	VF14837	2953	7.32264	4.24724	2.46034	4.20195	2.17256	2.4383	Pentatricopeptide repeat-containing protein At1g71460, chloroplastic (Precursor) GN=PCMP-A3 OS=Arabidopsis thaliana (Mouse-ear cress) PE=2 SV=1	pentatricopeptide repeat-containing protein, putative [Ricinus communis]
	VF01338	2952	42.6711	18.8676	7.92926	28.5221	19.2294	9.4012	Protein argonaute 7 GN=F10D13.11 OS=Arabidopsis thaliana (Mouse-ear cress) PE=2 SV=1	eukaryotic translation initiation factor 2c, putative [Ricinus communis]
	VF15962	2952	36.5128	22.4153	18.1677	27.2681	24.9774	18.8798	--	hypothetical protein JCGZ_23350 [Jatropha curcas]
	VF04518	2951	24.1259	15.1225	10.5836	17.9478	13.1749	12.0431	Pentatricopeptide repeat-containing protein At1g30610, chloroplastic (Precursor) GN=EMB2279 OS=Arabidopsis thaliana (Mouse-ear cress) PE=2 SV=1	pentatricopeptide repeat-containing protein, putative [Ricinus communis]
	VF05712	2951	18.3971	13.3364	11.0764	14.0557	10.663	6.91446	--	hypothetical protein JCGZ_12928 [Jatropha curcas]
	VF05816	2951	30.3236	20.5792	19.115	19.0855	18.5215	16.2188	DNA repair protein RAD50 GN=RAD50 OS=Arabidopsis thaliana (Mouse-ear cress) PE=1 SV=2	DNA repair-recombination family protein [Populus trichocarpa]
	VF17377	2951	4.83017	1.61128	1.42077	2.29504	1.25486	1.59149	Pentatricopeptide repeat-containing protein At4g32430, mitochondrial (Precursor) GN=F8B4.130 OS=Arabidopsis thaliana (Mouse-ear cress) PE=2 SV=1	hypothetical protein JCGZ_13317 [Jatropha curcas]
	VF26559	2951	32.7597	25.3844	22.3522	29.628	24.074	20.8241	#N/A	#N/A
	VF00712	2950	96.763	173.579	186.263	141.792	168.317	178.445	--	hypothetical protein JCGZ_25171 [Jatropha curcas]
	VF23074	2950	36.8963	21.3676	22.1146	22.7457	25.3977	17.9678	Probable receptor-like protein kinase At5g15080 GN=At5g15080 OS=Arabidopsis thaliana (Mouse-ear cress) PE=2 SV=1	hypothetical protein JCGZ_09721 [Jatropha curcas]
	VF03908	2949	51.4582	21.8577	24.8966	28.1265	26.3725	23.0193	--	hypothetical protein JCGZ_20979 [Jatropha curcas]
	VF17828	2949	11.8374	6.84541	6.49875	9.66892	8.20066	5.86438	Transcriptional adapter ADA2 GN=OSJNBa0047E24.21 OS=Oryza sativa subsp. japonica (Rice) PE=2 SV=2	hypothetical protein JCGZ_04353 [Jatropha curcas]
	VF15240	2948	3.71525	45.2754	57.5163	50.9518	65.1619	86.0075	--	hypothetical protein JCGZ_21223 [Jatropha curcas]
	VF17313	2948	55.5699	0.073647	0.133796	27.5635	4.08354	0.170553	--	PREDICTED: aspartic proteinase CDR1-like [Camelina sativa]
	VF21903	2948	52.1172	22.9447	19.5522	34.9287	31.4081	18.5121	Uncharacterized protein At5g65660 GN=At5g65660 OS=Arabidopsis thaliana (Mouse-ear cress) PE=2 SV=1	hypothetical protein JCGZ_12618 [Jatropha curcas]
	VF02140	2947	21.7275	13.8363	11.8394	14.3548	13.0983	12.7126	Chaperone protein dnaJ 20, chloroplastic (Precursor) GN=F18A5.220 OS=Arabidopsis thaliana (Mouse-ear cress) PE=1 SV=2	hypothetical protein JCGZ_02950 [Jatropha curcas]
	VF03021	2947	16.6617	12.1774	12.2246	12.1808	12.3637	11.3064	--	PREDICTED: protein N-lysine methyltransferase METTL21A isoform X1 [Populus euphratica]
	VF21956	2947	1.90364	0.955588	0.821541	1.52734	1.01415	0.782604	--	hypothetical protein JCGZ_25531 [Jatropha curcas]
	VF00580	2946	7.4847	4.4052	3.17129	5.60238	2.89092	3.16083	--	hypothetical protein JCGZ_14884 [Jatropha curcas]
	VF03726	2946	25.0086	14.5547	17.4976	19.484	16.2787	15.2956	--	hypothetical protein JCGZ_16733 [Jatropha curcas]
	VF25842	2946	2.46776	3.14775	3.46053	3.25639	3.30699	3.86206	Protein LURP-one-related 14 GN=At3g56180 OS=Arabidopsis thaliana (Mouse-ear cress) PE=2 SV=2	PREDICTED: protein LURP-one-related 14 isoform X2 [Nelumbo nucifera]
	VF06447	2945	54.4855	84.2285	90.5177	70.7748	87.7756	88.2471	Eukaryotic translation initiation factor 4E-1 GN=OJ1656_A11.43 OS=Oryza sativa subsp. japonica (Rice) PE=2 SV=1	hypothetical protein JCGZ_21649 [Jatropha curcas]
	VF11504	2945	24.5552	19.654	19.1598	19.2084	18.2153	15.9099	--	hypothetical protein JCGZ_22729 [Jatropha curcas]
	VF18630	2944	10.9847	18.6064	19.3949	19.4976	20.5298	21.4163	Ubiquitin carboxyl-terminal hydrolase 22 GN=UBP22 OS=Arabidopsis thaliana (Mouse-ear cress) PE=2 SV=1	hypothetical protein JCGZ_17010 [Jatropha curcas]
	VF24735	2944	9.8042	33.7328	32.1039	18.8197	28.294	44.1088	3-hydroxyacyl-CoA dehydrogenase OS=Cucumis sativus (Cucumber) PE=1 SV=1	hypothetical protein JCGZ_18016 [Jatropha curcas]
	VF07994	2943	44.3874	76.0228	77.424	63.4113	69.382	75.7598	Serine/threonine-protein phosphatase PP-X isozyme 2 GN=PPX2 OS=Arabidopsis thaliana (Mouse-ear cress) PE=2 SV=2	hypothetical protein CICLE_v10009012mg [Citrus clementina]
	VF12479	2943	6.26281	3.4036	3.05706	3.56443	2.48902	0.625024	WUSCHEL-related homeobox 1 GN=WOX1 OS=Arabidopsis thaliana (Mouse-ear cress) PE=2 SV=2	hypothetical protein JCGZ_27080 [Jatropha curcas]
	VF24932	2943	5.00549	3.40841	2.08796	3.6105	2.34712	1.29239	Putative pentatricopeptide repeat-containing protein At3g05240 GN=PCMP-E82 OS=Arabidopsis thaliana (Mouse-ear cress) PE=3 SV=2	hypothetical protein JCGZ_11404 [Jatropha curcas]
	VF11546	2942	35.5993	21.0424	21.7031	29.8987	20.4164	19.7283	WPP domain-interacting protein 1 GN=WIP1 OS=Arabidopsis thaliana (Mouse-ear cress) PE=1 SV=1	hypothetical protein JCGZ_09527 [Jatropha curcas]
	VF12693	2941	1579.91	445.207	561.415	626.158	441.874	460.269	RING-box protein 1a GN=F7C8.160 OS=Arabidopsis thaliana (Mouse-ear cress) PE=1 SV=1	RBX1 [Hevea brasiliensis]
	VF19934	2941	39.1263	0.485218	0.550857	19.942	1.5138	0.290126	Pentatricopeptide repeat-containing protein At2g42920, chloroplastic (Precursor) GN=PCMP-E75 OS=Arabidopsis thaliana (Mouse-ear cress) PE=2 SV=1	hypothetical protein JCGZ_10399 [Jatropha curcas]
	VF21809	2941	32.8804	16.0105	16.0141	22.7032	21.2521	15.4354	Disease resistance protein At4g27190 GN=At4g27190 OS=Arabidopsis thaliana (Mouse-ear cress) PE=2 SV=1	Disease resistance protein RPS5, putative [Ricinus communis]
	VFNG5339	2940	25.067	16.7433	14.304	15.7459	12.1274	12.7679	--	PREDICTED: cucumisin-like [Citrus sinensis]
	VF07786	2939	17.9264	35.6263	43.0907	26.642	41.0581	43.1974	Persulfide dioxygenase ETHE1 homolog, mitochondrial (Precursor) GN=GLY3 OS=Arabidopsis thaliana (Mouse-ear cress) PE=1 SV=3	PREDICTED: persulfide dioxygenase ETHE1 homolog, mitochondrial-like [Malus domestica]
	VF09650	2938	64.7938	21.2347	24.0822	43.3738	28.827	22.6269	Transcription factor GTE8 GN=GTE8 OS=Arabidopsis thaliana (Mouse-ear cress) PE=2 SV=2	hypothetical protein JCGZ_10170 [Jatropha curcas]
	VF09917	2938	34.6261	60.9809	51.8103	53.7591	62.8147	66.2348	#N/A	#N/A
	VF16549	2938	11.356	8.61072	6.69187	8.10641	8.09359	6.18907	Putative pentatricopeptide repeat-containing protein At5g65820 GN=At5g65820 OS=Arabidopsis thaliana (Mouse-ear cress) PE=3 SV=1	hypothetical protein JCGZ_12579 [Jatropha curcas]
	VFNG923	2938	1.9504	0.910385	1.10426	1.08777	0.663085	0.339295	#N/A	#N/A
	VF02220	2937	38.0121	61.3267	57.523	56.9001	61.9434	61.1685	--	hypothetical protein JCGZ_19582 [Jatropha curcas]
	VF05061	2937	20.5284	15.4167	15.0556	15.1924	12.9634	11.9024	--	hypothetical protein CICLE_v10008279mg [Citrus clementina]
	VF14594	2937	23.7823	14.2246	13.6493	18.5134	14.1018	14.2734	Protein transport protein Sec24-like At4g32640 GN=At4g32640 OS=Arabidopsis thaliana (Mouse-ear cress) PE=2 SV=3	hypothetical protein VITISV_020350 [Vitis vinifera]
	VF05215	2936	24.052	18.8626	18.5604	19.8496	20.5842	16.4	--	hypothetical protein JCGZ_11548 [Jatropha curcas]
	VF05790	2936	13.7331	9.38498	10.8042	10.7915	8.66216	8.50482	#N/A	#N/A
	VF21835	2936	9.5066	5.05996	4.12802	7.23356	5.69181	4.35715	RNA polymerase sigma factor sigD, chloroplastic (Precursor) GN=MSH12.20 OS=Arabidopsis thaliana (Mouse-ear cress) PE=2 SV=1	hypothetical protein JCGZ_16865 [Jatropha curcas]
	VF01504	2935	24.0706	16.6586	16.0668	17.149	17.8951	15.4225	Metal tolerance protein C1 GN=F17A22.22 OS=Arabidopsis thaliana (Mouse-ear cress) PE=2 SV=1	hypothetical protein JCGZ_13879 [Jatropha curcas]
	VF16830	2935	54.5813	28.9821	26.7035	39.1507	33.2723	28.9561	--	conserved hypothetical protein [Ricinus communis]
	VF19813	2935	50.3223	24.6182	24.7208	34.63	32.0152	24.5123	F-box protein At2g40910 GN=At2g40910 OS=Arabidopsis thaliana (Mouse-ear cress) PE=2 SV=1	hypothetical protein JCGZ_03302 [Jatropha curcas]
	VF25230	2935	32.6992	13.7423	13.8706	23.7366	12.8826	13.3397	Bifunctional L-3-cyanoalanine synthase/cysteine synthase D2 GN=F15F15.90 OS=Arabidopsis thaliana (Mouse-ear cress) PE=1 SV=1	hypothetical protein JCGZ_01036 [Jatropha curcas]
	VF01911	2934	46.6735	15.6677	13.8521	20.3275	19.6817	14.6542	#N/A	#N/A
	VF22785	2934	71.381	38.4726	29.6865	54.7108	43.0057	30.7344	65-kDa microtubule-associated protein 6 GN=MAP65-6 OS=Arabidopsis thaliana (Mouse-ear cress) PE=1 SV=1	hypothetical protein JCGZ_04820 [Jatropha curcas]
	VFNG6168	2934	115.841	0.113948	2.4964e-44	26.7413	4.47972	5.01511	#N/A	#N/A
	VFNG863	2934	4.03139	0.842862	0.982295	2.23483	0.724699	0.965902	--	PREDICTED: uncharacterized protein LOC103698660, partial [Phoenix dactylifera]
	VF05111	2933	26.0252	17.5921	17.1733	21.7236	13.5326	11.4038	E3 ubiquitin-protein ligase COP1 GN=COP1 OS=Arabidopsis thaliana (Mouse-ear cress) PE=1 SV=2	hypothetical protein JCGZ_11453 [Jatropha curcas]
	VF16251	2933	12.3911	7.49368	6.1651	6.88913	6.69305	5.82497	Violaxanthin de-epoxidase, chloroplastic (Precursor) GN=VDE1 OS=Spinacia oleracea (Spinach) PE=1 SV=2	hypothetical protein JCGZ_06873 [Jatropha curcas]
	VF19504	2933	110.417	69.191	75.8854	83.958	84.105	68.076	--	hypothetical protein JCGZ_21906 [Jatropha curcas]
	VF15914	2932	438.002	302.672	312.015	395.271	322.664	274.179	60S ribosomal protein L7-2 GN=RPL7B OS=Arabidopsis thaliana (Mouse-ear cress) PE=2 SV=1	hypothetical protein JCGZ_08960 [Jatropha curcas]
	VF06326	2931	3.82491	0.486228	0.807277	1.1826	0.645822	0.678945	--	hypothetical protein JCGZ_07963 [Jatropha curcas]
	VF09392	2931	20.7287	5.99492	5.43957	11.9942	7.72632	6.62175	--	hypothetical protein JCGZ_19025 [Jatropha curcas]
	VF06176	2930	22.8737	10.0304	10.3316	17.4298	12.4226	9.6127	U11/U12 small nuclear ribonucleoprotein 59 kDa protein GN=SNRNP59 OS=Arabidopsis thaliana (Mouse-ear cress) PE=2 SV=1	hypothetical protein JCGZ_14321 [Jatropha curcas]
	VF08641	2930	9.1852	0	0	4.83015	0.529648	0	Auxin-induced protein 10A5 OS=Glycine max (Soybean) PE=2 SV=1	hypothetical protein JCGZ_25564 [Jatropha curcas]
	VF09801	2930	103.241	237.544	252.108	178.374	231.373	238.477	ATP synthase subunit d, mitochondrial GN=At3g52300 OS=Arabidopsis thaliana (Mouse-ear cress) PE=1 SV=3	ATP synthase D chain, mitochondrial [Theobroma cacao]
	VF11295	2930	66.4473	25.5313	28.2593	44.8378	32.3922	28.1545	E3 ubiquitin-protein ligase BRE1-like 1 OS=Arabidopsis thaliana (Mouse-ear cress) PE=1 SV=1	hypothetical protein JCGZ_14614 [Jatropha curcas]
	VF14247	2930	9.51257	11.5768	12.658	11.4894	12.0307	14.1064	Transcription factor DIVARICATA GN=DIVARICATA OS=Antirrhinum majus (Garden snapdragon) PE=2 SV=1	hypothetical protein JCGZ_24477 [Jatropha curcas]
	VF10810	2929	15.6169	10.9257	10.495	10.4696	9.55157	7.37706	Probable DNA helicase MCM9 GN=MCM9 OS=Arabidopsis thaliana (Mouse-ear cress) PE=3 SV=1	Minichromosome maintenance protein MCM, putative [Ricinus communis]
	VF12446	2929	9.51955	2.53929	2.04976	6.22595	2.72903	2.28318	Receptor-like protein kinase 2 (Precursor) GN=RCH2 OS=Arabidopsis thaliana (Mouse-ear cress) PE=1 SV=1	hypothetical protein JCGZ_26663 [Jatropha curcas]
	VF24387	2929	38.8756	69.5936	90.5254	63.245	76.2542	84.8769	--	hypothetical protein JCGZ_02165 [Jatropha curcas]
	VF13737	2928	18.6178	64.6301	78.1746	36.4626	68.4039	82.4451	Caffeic acid 3-O-methyltransferase 1 GN=OMT1 OS=Populus tremuloides (Quaking aspen) PE=1 SV=1	PREDICTED: caffeic acid 3-O-methyltransferase-like [Vitis vinifera]
	VF17101	2928	41.8661	30.5182	20.9058	30.8347	21.7666	14.8824	GDSL esterase/lipase At1g71691 (Precursor) GN=At1g71691 OS=Arabidopsis thaliana (Mouse-ear cress) PE=2 SV=1	zinc finger protein, putative [Ricinus communis]
	VF18526	2928	7.49613	3.33126	3.39917	4.58284	3.63086	3.59766	Putative pentatricopeptide repeat-containing protein At5g59900 GN=At5g59900 OS=Arabidopsis thaliana (Mouse-ear cress) PE=3 SV=1	PREDICTED: putative pentatricopeptide repeat-containing protein At5g59900 isoform X1 [Populus euphratica]
	VF00749	2927	18.5039	14.1924	14.8396	15.566	15.6648	14.1114	--	conserved hypothetical protein [Ricinus communis]
	VF03695	2927	299.958	502.538	502.091	522.772	551.877	599.326	ADP,ATP carrier protein 1, mitochondrial (Precursor) GN=ANT1 OS=Gossypium hirsutum (Upland cotton) PE=2 SV=1	ADP,ATP carrier protein, putative [Ricinus communis]
	VF11728	2927	29.8759	24.1783	22.9927	27.5473	25.1219	21.2221	--	PREDICTED: SWR1-complex protein 4-like [Populus euphratica]
	VF11272	2926	55.1857	27.019	27.7245	38.8147	31.2886	28.9966	Protein ARABIDILLO 1 GN=FBX5 OS=Arabidopsis thaliana (Mouse-ear cress) PE=1 SV=1	ubiquitin-protein ligase, putative [Ricinus communis]
	VF23212	2926	7.74597e-11	6.70284	6.90501	3.14424	4.75327	7.38422	E3 ubiquitin-protein ligase RING1-like GN=At3g19950 OS=Arabidopsis thaliana (Mouse-ear cress) PE=1 SV=1	zinc finger family protein [Populus trichocarpa]
	VF27485	2926	14.0745	8.58864	8.02481	7.807	7.01837	4.79809	Pentatricopeptide repeat-containing protein At2g15980 GN=At2g15980 OS=Arabidopsis thaliana (Mouse-ear cress) PE=2 SV=1	pentatricopeptide repeat-containing protein, putative [Ricinus communis]
	VFNG5338	2926	40.3485	25.43	21.7368	22.6662	18.7526	17.7494	--	PREDICTED: uncharacterized protein LOC104887199 [Beta vulgaris subsp. vulgaris]
	VF13889	2925	17.0051	23.4228	25.1669	19.2296	24.4792	27.925	Probable glucan 1,3-alpha-glucosidase (Precursor) OS=Oryza sativa subsp. japonica (Rice) PE=3 SV=1	neutral alpha-glucosidase ab precursor, putative [Ricinus communis]
	VF00533	2924	4.01992	0	0	2.17646	0.381256	0	Snakin-1 (Precursor) GN=SN1 OS=Solanum tuberosum (Potato) PE=1 SV=1	conserved hypothetical protein [Ricinus communis]
	VF03354	2924	35.9815	29.2191	29.8216	29.2315	27.3489	27.0726	Transcriptional adapter ADA2b GN=dl4235c OS=Arabidopsis thaliana (Mouse-ear cress) PE=1 SV=1	hypothetical protein JCGZ_19399 [Jatropha curcas]
	VF04728	2923	43.5298	25.895	24.73	37.1619	27.7569	23.376	DEAD-box ATP-dependent RNA helicase 5 GN=B1114D08.16-1 OS=Oryza sativa subsp. japonica (Rice) PE=2 SV=1	hypothetical protein JCGZ_01531 [Jatropha curcas]
	VF10513	2923	108.911	61.3833	26.0593	47.0711	34.0023	2.42717	Growth-regulating factor 5 GN=GRF5 OS=Arabidopsis thaliana (Mouse-ear cress) PE=1 SV=1	conserved hypothetical protein [Ricinus communis]
	VF12496	2923	3.08695	1.02185	1.52525	2.07948	1.73683	0.977574	#N/A	#N/A
	VF05593	2921	13.395	7.07503	3.2656	9.42941	6.9584	2.51101	#N/A	#N/A
	VF14470	2921	43.851	25.2611	27.6171	33.9033	22.0081	24.5696	Probable beta-1,4-xylosyltransferase IRX10 GN=F17L21.23 OS=Arabidopsis thaliana (Mouse-ear cress) PE=2 SV=1	hypothetical protein JCGZ_25245 [Jatropha curcas]
	VF15806	2921	1.56949	0.918348	1.14277	1.26787	0.893548	0.730231	Pentatricopeptide repeat-containing protein At3g12770 GN=PCMP-H43 OS=Arabidopsis thaliana (Mouse-ear cress) PE=2 SV=1	pentatricopeptide repeat-containing protein, putative [Ricinus communis]
	VF26732	2921	98.1853	33.8297	41.841	56.2625	39.7064	40.3225	--	hypothetical protein JCGZ_10565 [Jatropha curcas]
	VFNG2999	2921	3.31272	5.53346	5.82574	5.59959	6.0565	7.58754	Cinnamoyl-CoA reductase 1 GN=T24D18.5 OS=Arabidopsis thaliana (Mouse-ear cress) PE=1 SV=1	cinnamoyl-CoA reductase, putative [Ricinus communis]
	VF20285	2920	43.9423	69.4243	88.4316	59.5965	81.2779	91.4799	--	hypothetical protein JCGZ_04807 [Jatropha curcas]
	VF17193	2919	201.561	140.575	160.278	162.587	137.26	113.005	DEAD-box ATP-dependent RNA helicase 7 GN=MMI9.2 OS=Arabidopsis thaliana (Mouse-ear cress) PE=1 SV=2	hypothetical protein JCGZ_26200 [Jatropha curcas]
	VFNG333	2919	9.48072	0.106564	0.49785	5.52599	0.996179	0	Zinc finger BED domain-containing protein RICESLEEPER 3 GN=OSJNBb0035N21.10 OS=Oryza sativa subsp. japonica (Rice) PE=2 SV=1	PREDICTED: zinc finger BED domain-containing protein RICESLEEPER 2-like [Nicotiana sylvestris]
	VF02100	2918	100.837	74.9216	69.162	73.9312	57.9357	51.2684	--	conserved hypothetical protein [Ricinus communis]
	VF04260	2918	14.6973	31.2363	34.4028	25.5021	28.846	32.1549	(DL)-glycerol-3-phosphatase 2 OS=Arabidopsis thaliana (Mouse-ear cress) PE=1 SV=1	hypothetical protein JCGZ_08666 [Jatropha curcas]
	VF04713	2918	14.2248	0.0987836	0	7.79011	0.769523	0.0386522	--	transcription elongation factor s-II, putative [Ricinus communis]
	VF05181	2918	3.73257	0.915949	1.26096	2.54743	0.84801	0.876106	UDP-glycosyltransferase 74B1 GN=UGT74B1 OS=Arabidopsis thaliana (Mouse-ear cress) PE=1 SV=1	hypothetical protein JCGZ_11519 [Jatropha curcas]
	VF07634	2918	31.1156	17.6872	18.9498	25.5013	21.1146	17.4814	Mediator of RNA polymerase II transcription subunit 7a OS=Arabidopsis thaliana (Mouse-ear cress) PE=1 SV=1	hypothetical protein JCGZ_03048 [Jatropha curcas]
	VFNG5881	2918	3.52242	1.52171	0.109964	2.14465	1.08689	0.308971	SKP1-like protein 3 GN=ASK3 OS=Arabidopsis thaliana (Mouse-ear cress) PE=1 SV=1	E3 ubiquitin ligase SCF complex subunit SKP1/ASK1 family protein [Populus trichocarpa]
	VF08146	2917	16.9623	13.5413	12.0369	13.2173	13.4929	10.3285	--	hypothetical protein JCGZ_20152 [Jatropha curcas]
	VF28111	2917	17.2323	11.2102	12.1128	11.7332	9.24009	8.46166	Plasma membrane ATPase 4 GN=PMA4 OS=Nicotiana plumbaginifolia (Leadwort-leaved tobacco) PE=2 SV=1	hypothetical protein JCGZ_05050 [Jatropha curcas]
	VF04437	2915	96.2986	67.7363	49.8065	60.9556	47.4142	46.234	Homeobox-leucine zipper protein HAT4 OS=Arabidopsis thaliana (Mouse-ear cress) PE=1 SV=1	hypothetical protein JCGZ_03440 [Jatropha curcas]
	VF25947	2915	39.4565	18.6938	18.2956	32.2306	17.2192	15.3622	QWRF motif-containing protein 2 GN=QWRF2 OS=Arabidopsis thaliana (Mouse-ear cress) PE=2 SV=1	hypothetical protein JCGZ_16311 [Jatropha curcas]
	VF25996	2915	8.73423	5.36304	5.91973	7.49034	6.18345	4.10557	#N/A	#N/A
	VF00635	2914	12.6671	25.3279	25.7037	23.949	21.4596	28.0583	50S ribosomal protein L11, chloroplastic {ECO:0000255|HAMAP-Rule:MF_00736} OS=Guillardia theta (Cryptomonas phi) PE=3 SV=1	50S robosomal protein L11, putative [Ricinus communis]
	VF18624	2914	105.243	144.095	151.165	144.193	166.175	181.426	Succinyl-CoA ligase [ADP-forming] subunit beta, mitochondrial (Precursor) GN=At2g20420 OS=Arabidopsis thaliana (Mouse-ear cress) PE=1 SV=1	hypothetical protein JCGZ_17656 [Jatropha curcas]
	VFNG2528	2914	6.6821	7.54679e-07	0.903357	3.1003	1.70684	0.582325	--	conserved hypothetical protein [Ricinus communis]
	VF11009	2913	9.32762	13.3987	13.0361	12.124	13.0171	13.0079	--	hypothetical protein JCGZ_26914 [Jatropha curcas]
	VF13217	2913	42.09	60.5321	63.1428	48.509	60.8978	64.479	--	hypothetical protein JCGZ_18830 [Jatropha curcas]
	VF09732	2912	6.85289	2.24122	2.8905	5.04839	2.52215	2.21585	--	DNA binding protein, putative [Ricinus communis]
	VF27202	2912	5.64719	4.47947	3.4362	4.7452	3.97936	3.37741	--	hypothetical protein JCGZ_25956 [Jatropha curcas]
	VF27584	2912	27.1613	22.09	22.1606	23.3608	19.775	17.6887	--	hypothetical protein RCOM_1491960 [Ricinus communis]
	VF13809	2911	35.666	16.979	18.4589	28.1571	18.4794	17.0125	--	hypothetical protein JCGZ_15893 [Jatropha curcas]
	VF14854	2911	18.1432	38.4572	32.1366	34.3944	35.3817	39.7593	30S ribosomal protein S16, chloroplastic {ECO:0000255|HAMAP-Rule:MF_00385} OS=Emiliania huxleyi (Pontosphaera huxleyi) PE=3 SV=1	hypothetical protein PRUPE_ppa012786mg [Prunus persica]
	VF26332	2911	185.706	308.553	363.37	246.583	300.942	384.093	ATP synthase subunit gamma, mitochondrial (Precursor) GN=ATPC OS=Ipomoea batatas (Sweet potato) PE=1 SV=2	hypothetical protein JCGZ_11722 [Jatropha curcas]
	VF05688	2910	21.0262	13.9076	13.435	18.4633	14.5535	12.9876	7-hydroxymethyl chlorophyll a reductase, chloroplastic (Precursor) GN=T1G11.13 OS=Arabidopsis thaliana (Mouse-ear cress) PE=1 SV=1	hypothetical protein JCGZ_12914 [Jatropha curcas]
	VF12034	2910	104.293	189.04	179.934	187.499	214.771	232.309	Eukaryotic translation initiation factor isoform 4E-2 GN=OSJNBa0006L06.9 OS=Oryza sativa subsp. japonica (Rice) PE=2 SV=2	hypothetical protein JCGZ_02381 [Jatropha curcas]
	VF23133	2909	13.0014	19.0351	20.2814	15.7445	17.6363	22.1179	Arogenate dehydratase/prephenate dehydratase 1, chloroplastic (Precursor) GN=F25C20.4 OS=Arabidopsis thaliana (Mouse-ear cress) PE=1 SV=1	prephenate dehydratase, putative [Ricinus communis]
	VF02540	2908	20.1238	14.141	15.2633	15.8001	13.7205	9.97652	DNA-directed RNA polymerase II subunit RPB2 GN=RPB2 OS=Solanum lycopersicum (Tomato) PE=2 SV=1	hypothetical protein JCGZ_24565 [Jatropha curcas]
	VF24969	2908	29.5512	20.6597	23.2752	24.9365	23.8105	18.6976	Probable UDP-N-acetylglucosamine--peptide N-acetylglucosaminyltransferase SEC GN=SEC OS=Arabidopsis thaliana (Mouse-ear cress) PE=2 SV=1	hypothetical protein JCGZ_11365 [Jatropha curcas]
	VFNG764	2908	5.43582	9.85892	8.5911	9.08465	8.79416	11.0759	#N/A	#N/A
	VF07104	2907	10.6058	17.9304	17.6389	13.9242	19.2401	18.5831	Putative PAP-specific phosphatase, mitochondrial (Precursor) GN=At4g05090 OS=Arabidopsis thaliana (Mouse-ear cress) PE=2 SV=1	diphosphonucleoside phosphohydrolase, putative [Ricinus communis]
	VF27595	2906	43.5798	27.2718	32.606	30.317	28.9584	25.2992	Transcription factor bHLH68 GN=F19B15.130 OS=Arabidopsis thaliana (Mouse-ear cress) PE=2 SV=2	hypothetical protein JCGZ_06318 [Jatropha curcas]
	VF00711	2905	30.2707	25.6612	24.7816	27.0318	26.6376	25.3167	DNA-binding protein BIN4 GN=K18P6.17 OS=Arabidopsis thaliana (Mouse-ear cress) PE=1 SV=2	hypothetical protein JCGZ_25172 [Jatropha curcas]
	VF12741	2905	36.9678	12.1342	6.86125	25.7583	12.6783	8.75754	--	hypothetical protein JCGZ_24636 [Jatropha curcas]
	VF25599	2905	27.1209	13.5182	12.9842	18.7685	17.332	13.6774	--	hypothetical protein JCGZ_05395 [Jatropha curcas]
	VFNG3504	2905	12.9096	6.55874	7.19392	11.1757	6.74486	4.0651	Uncharacterized mitochondrial protein AtMg01250 GN=AtMg01250 OS=Arabidopsis thaliana (Mouse-ear cress) PE=4 SV=1	hypothetical protein VITISV_005356 [Vitis vinifera]
	VF22147	2904	27.6114	14.3582	16.2242	18.7141	19.2496	14.0077	Peptidyl-tRNA hydrolase, chloroplastic (Precursor) GN=At1g18440 OS=Arabidopsis thaliana (Mouse-ear cress) PE=2 SV=2	hypothetical protein JCGZ_05868 [Jatropha curcas]
	VF00290	2903	10.8731	8.33004	9.23285	9.82407	8.98755	8.07145	--	hypothetical protein JCGZ_10935 [Jatropha curcas]
	VF01881	2903	15.8456	9.85953	8.75319	11.7835	11.2507	9.39632	--	hypothetical protein JCGZ_09569 [Jatropha curcas]
	VF24792	2903	11.0617	7.14551	5.97056	7.58005	3.86366	3.62593	Phospholipase A(1) LCAT3 GN=LCAT3 OS=Arabidopsis thaliana (Mouse-ear cress) PE=1 SV=1	phosphatidylcholine-sterol O-acyltransferase, putative [Ricinus communis]
	VF19921	2902	35.7074	25.6433	18.4176	23.5058	22.0126	19.2317	--	hypothetical protein JCGZ_17346 [Jatropha curcas]
	VF21945	2902	24.1714	34.7343	33.7402	27.8677	34.3289	35.3947	--	--
	VF25714	2902	10.6999	3.88023	4.11685	7.31606	3.15982	3.854	--	hypothetical protein VITISV_033018 [Vitis vinifera]
	VF09894	2901	30.3492	20.8769	21.5597	26.045	23.0619	21.318	--	hypothetical protein JCGZ_23148 [Jatropha curcas]
	VF27916	2901	27.9943	13.6085	14.9426	23.8897	14.8449	10.0909	DNA-directed RNA polymerase II subunit 1 GN=F4B14.70 OS=Arabidopsis thaliana (Mouse-ear cress) PE=1 SV=3	DNA-directed RNA polymerase I largest subunit, putative [Ricinus communis]
	VF22303	2900	3.41468	1.33338	0.647598	1.49817	0.528615	0.897147	#N/A	#N/A
	VF25017	2900	286.096	200.408	209.814	224.815	176.675	129.979	Probable nucleolar protein 5-2 GN=T12H1.2 OS=Arabidopsis thaliana (Mouse-ear cress) PE=2 SV=1	hypothetical protein JCGZ_11319 [Jatropha curcas]
	VF25207	2900	19.8284	13.6969	12.8231	13.4211	12.8342	8.07208	--	hypothetical protein JCGZ_19930 [Jatropha curcas]
	VF02486	2899	34.1908	20.8664	11.1217	17.379	17.6996	8.55208	Double-stranded RNA-binding protein 3 GN=DRB3 OS=Arabidopsis thaliana (Mouse-ear cress) PE=2 SV=1	hypothetical protein JCGZ_26832 [Jatropha curcas]
	VF03096	2899	78.3743	109.308	108.046	99.3097	122.183	114.986	Ankyrin repeat domain-containing protein 2 GN=F15J1.20 OS=Arabidopsis thaliana (Mouse-ear cress) PE=1 SV=2	hypothetical protein JCGZ_10785 [Jatropha curcas]
	VF27181	2899	147.016	75.0633	79.5582	107.856	90.111	81.3761	Protein BOBBER 1 GN=BOB1 OS=Arabidopsis thaliana (Mouse-ear cress) PE=1 SV=1	nuclear movement protein nudc, putative [Ricinus communis]
	VF09091	2898	2.89643	5.54521	5.32426	4.3177	4.45804	5.92564	--	hypothetical protein JCGZ_25355 [Jatropha curcas]
	VF10946	2898	48.4485	82.1315	75.3115	63.0256	69.7045	85.9582	Putative quinone-oxidoreductase homolog, chloroplastic GN=At4g13010 OS=Arabidopsis thaliana (Mouse-ear cress) PE=2 SV=1	PREDICTED: putative quinone-oxidoreductase homolog, chloroplastic [Populus euphratica]
	VF24500	2898	103.74	77.9476	87.4107	86.2061	75.098	72.0251	Probable alpha-mannosidase I MNS4 GN=MNS4 OS=Arabidopsis thaliana (Mouse-ear cress) PE=2 SV=1	hypothetical protein JCGZ_02269 [Jatropha curcas]
	VFNG4214	2898	26.5943	13.8086	14.0314	21.4605	12.9441	13.0834	#N/A	#N/A
	VF23600	2897	3.05676	2.27405	1.91663	2.26492	1.99989	1.26963	Pentatricopeptide repeat-containing protein At4g37170 OS=Arabidopsis thaliana (Mouse-ear cress) PE=3 SV=1	pentatricopeptide repeat-containing protein, putative [Ricinus communis]
	VF07337	2896	5.43695	2.62331	3.56009	3.175	3.20665	2.02964	Probable glycosyltransferase At5g03795 GN=At5g03795 OS=Arabidopsis thaliana (Mouse-ear cress) PE=3 SV=2	catalytic, putative [Ricinus communis]
	VF14074	2896	60.7842	68.799	71.2956	64.4258	68.5399	70.656	Ethylene-insensitive protein 2 GN=F12E4.10 OS=Arabidopsis thaliana (Mouse-ear cress) PE=1 SV=1	hypothetical protein JCGZ_16519 [Jatropha curcas]
	VF24628	2896	117.078	64.0665	68.0412	83.7789	71.955	69.8483	Protein Iojap-related, mitochondrial (Precursor) GN=At1g67620 OS=Arabidopsis thaliana (Mouse-ear cress) PE=2 SV=1	hypothetical protein JCGZ_17920 [Jatropha curcas]
	VF09501	2895	10.9702	5.97935	6.39653	8.03461	5.8811	6.39965	--	hypothetical protein POPTR_0013s11030g [Populus trichocarpa]
	VF23064	2895	12.787	9.53128	10.2327	10.7933	10.5009	9.82017	--	conserved hypothetical protein [Ricinus communis]
	VF02009	2894	20.4579	11.575	10.2655	11.3205	8.88596	2.80771	--	hypothetical protein JCGZ_13786 [Jatropha curcas]
	VF28411	2894	39.7409	27.0869	28.656	32.7796	32.1549	26.4384	DEAD-box ATP-dependent RNA helicase ISE2, chloroplastic (Precursor) GN=F20P5.20 OS=Arabidopsis thaliana (Mouse-ear cress) PE=1 SV=2	helicase, putative [Ricinus communis]
	VF22952	2893	131.565	98.9094	103.687	116.626	87.305	83.3035	Probable inactive receptor kinase At1g48480 (Precursor) GN=RKL1 OS=Arabidopsis thaliana (Mouse-ear cress) PE=2 SV=1	hypothetical protein JCGZ_26596 [Jatropha curcas]
	VF23830	2893	219.549	166.727	140.534	149.847	139.148	112.702	Homeobox-leucine zipper protein ATHB-6 GN=ATHB-6 OS=Arabidopsis thaliana (Mouse-ear cress) PE=1 SV=1	hypothetical protein JCGZ_18664 [Jatropha curcas]
	VF04424	2892	25.5166	17.7616	15.0552	22.2051	16.3376	15.3034	Transcription factor E2FA GN=F11F19.8 OS=Arabidopsis thaliana (Mouse-ear cress) PE=1 SV=1	hypothetical protein JCGZ_08780 [Jatropha curcas]
	VF05773	2892	65.9154	46.7738	43.1172	46.4435	50.562	40.7189	--	unnamed protein product [Vitis vinifera]
	VF16257	2892	26.3624	59.0553	62.7471	36.8355	53.8027	69.5703	--	hypothetical protein JCGZ_06868 [Jatropha curcas]
	VF22590	2892	14.7438	11.1844	9.57991	10.0818	9.41598	7.70164	F-box/LRR-repeat protein 25 GN=FBL25 OS=Arabidopsis thaliana (Mouse-ear cress) PE=2 SV=1	hypothetical protein POPTR_0015s01360g [Populus trichocarpa]
	VF20825	2891	25.6584	15.0683	15.3634	18.8821	18.834	14.9931	Ubiquitin carboxyl-terminal hydrolase 8 GN=UBP8 OS=Arabidopsis thaliana (Mouse-ear cress) PE=2 SV=2	hypothetical protein JCGZ_16247 [Jatropha curcas]
	VF25653	2891	24.4393	18.9658	16.5077	22.3737	17.3153	15.1	--	hypothetical protein JCGZ_02657 [Jatropha curcas]
	VF10486	2890	15.3862	35.4155	40.1555	22.4328	33.2528	43.8695	UPF0678 fatty acid-binding protein-like protein At1g79260 GN=At1g79260 OS=Arabidopsis thaliana (Mouse-ear cress) PE=1 SV=1	hypothetical protein JCGZ_19711 [Jatropha curcas]
	VF12338	2890	26.7165	18.1646	18.4895	23.4606	19.132	18.0328	--	hypothetical protein JCGZ_13822 [Jatropha curcas]
	VF20889	2890	11.314	3.95617	5.45971	6.92003	5.67566	4.86535	--	--
	VF25122	2890	16.976	20.483	22.4309	21.3731	20.92	23.5876	Transcription factor ICE1 OS=Arabidopsis thaliana (Mouse-ear cress) PE=1 SV=1	Transcription factor ICE1, putative [Ricinus communis]
	VF25895	2889	19.0597	11.4352	10.6922	15.4249	12.969	11.1383	--	hypothetical protein JCGZ_01522 [Jatropha curcas]
	VFNG1388	2889	10.0129	0.0086963	0.00463279	5.74297	1.08121e-09	1.19784e-15	#N/A	#N/A
	VF24165	2888	76.0563	44.2118	47.8641	59.1663	55.7661	44.8762	Protein SGT1 homolog B GN=F8L21.50 OS=Arabidopsis thaliana (Mouse-ear cress) PE=1 SV=1	hypothetical protein JCGZ_20532 [Jatropha curcas]
	VF24197	2888	92.9988	100.731	109.192	102.17	105.704	110.424	#N/A	#N/A
	VFNG1133	2888	51.8736	23.6118	25.2449	29.3464	24.0356	25.4971	RNA-directed DNA polymerase homolog OS=Oenothera berteroana (Bertero&apos;s evening primrose) PE=4 SV=1	DNA/RNA polymerases superfamily protein [Theobroma cacao]
	VFNG3570	2888	32.4687	25.7047	23.2519	27.8564	20.5878	18.5392	Zinc finger protein VAR3, chloroplastic (Precursor) GN=VAR3 OS=Arabidopsis thaliana (Mouse-ear cress) PE=1 SV=2	hypothetical protein JCGZ_27101 [Jatropha curcas]
	VF07288	2887	16.4165	10.4243	8.60622	13.5669	10.2605	9.29578	E3 ubiquitin-protein ligase RMA1H1 GN=RMA1H1 OS=Capsicum annuum (Bell pepper) PE=1 SV=1	hypothetical protein JCGZ_21434 [Jatropha curcas]
	VFNG4994	2887	52.6328	40.7987	34.9102	37.2269	38.6068	31.3337	WAT1-related protein At1g09380 GN=At1g09380 OS=Arabidopsis thaliana (Mouse-ear cress) PE=2 SV=1	hypothetical protein JCGZ_23192 [Jatropha curcas]
	VF03988	2885	19.9144	7.71815	3.56759	14.7475	8.37038	3.83185	--	hypothetical protein JCGZ_00909 [Jatropha curcas]
	VF11206	2885	41.8117	69.9765	64.342	56.4258	59.8055	80.2772	NAD-dependent malic enzyme 62 kDa isoform, mitochondrial (Precursor) OS=Solanum tuberosum (Potato) PE=1 SV=1	malic enzyme, putative [Ricinus communis]
	VF11427	2885	27.7672	11.0012	8.75906	19.8486	12.3754	10.5113	Probable terpene synthase 13 GN=TPS13 OS=Ricinus communis (Castor bean) PE=3 SV=1	hypothetical protein JCGZ_21304 [Jatropha curcas]
	VF02921	2884	7.18429	3.56723	4.74722	4.48718	3.99143	3.67296	Transcription factor bHLH130 GN=T24P15.19 OS=Arabidopsis thaliana (Mouse-ear cress) PE=1 SV=1	hypothetical protein JCGZ_06818 [Jatropha curcas]
	VF05152	2884	8.72402	4.3347	1.22295	6.0944	3.44325	1.24358	#N/A	#N/A
	VF10073	2884	40.5626	35.6606	37.0249	37.4862	37.6048	34.7312	CRS2-associated factor 1, mitochondrial (Precursor) GN=At4g31010 OS=Arabidopsis thaliana (Mouse-ear cress) PE=2 SV=1	JHL05D22.2 [Jatropha curcas]
	VF23669	2884	110.743	201.115	209.239	140.915	191.918	257.899	NEDD8-conjugating enzyme Ubc12 GN=RCE1 OS=Arabidopsis thaliana (Mouse-ear cress) PE=1 SV=1	ubiquitin-conjugating enzyme m, putative [Ricinus communis]
	VF10068	2883	100.859	127.713	141.632	124.467	135.791	135.063	Histone deacetylase complex subunit SAP18 GN=At2g45640 OS=Arabidopsis thaliana (Mouse-ear cress) PE=1 SV=1	Histone deacetylase complex subunit SAP18, putative [Ricinus communis]
	VF16215	2883	18.3803	13.9221	9.8779	12.5587	10.4153	9.52069	Uncharacterized protein At5g06450 GN=At5g06450 OS=Arabidopsis thaliana (Mouse-ear cress) PE=1 SV=1	PREDICTED: uncharacterized protein At5g06450-like [Populus euphratica]
	VF21069	2883	103.944	158.642	169.329	124.692	169.1	171.802	Ras-related protein Rab7 OS=Pisum sativum (Garden pea) PE=2 SV=1	RAS-related GTP-binding family protein [Populus trichocarpa]
	VF24795	2883	30.1567	17.326	5.26164	17.7919	6.37508	5.14068	Probable terpene synthase 13 GN=TPS13 OS=Ricinus communis (Castor bean) PE=3 SV=1	hypothetical protein JCGZ_21304 [Jatropha curcas]
	VF27886	2883	10.7379	7.77295	6.98355	9.59269	7.96196	5.61312	Pentatricopeptide repeat-containing protein At2g41720 GN=EMB2654 OS=Arabidopsis thaliana (Mouse-ear cress) PE=2 SV=1	hypothetical protein JCGZ_21098 [Jatropha curcas]
	VF02543	2882	31.3211	10.8645	4.91765	23.2544	8.28225	5.3748	Putative RING-H2 finger protein ATL69 GN=ATL69 OS=Arabidopsis thaliana (Mouse-ear cress) PE=3 SV=1	hypothetical protein JCGZ_24568 [Jatropha curcas]
	VF03773	2882	22.063	14.8257	13.8002	13.4963	12.1546	9.3484	Alpha-ketoglutarate-dependent dioxygenase alkB GN=At1g11780 OS=Arabidopsis thaliana (Mouse-ear cress) PE=2 SV=2	PREDICTED: uncharacterized protein LOC105110292 [Populus euphratica]
	VF05452	2882	18.5331	13.1449	13.6849	13.3183	11.4127	9.85062	Pentatricopeptide repeat-containing protein At3g59040 GN=At3g59040 OS=Arabidopsis thaliana (Mouse-ear cress) PE=2 SV=2	hypothetical protein JCGZ_06728 [Jatropha curcas]
	VF18377	2882	84.4078	192.035	159.032	138.642	186.565	184.278	--	hypothetical protein JCGZ_06110 [Jatropha curcas]
	VF01544	2881	21.6686	17.392	16.4311	16.9998	14.4014	14.0983	--	hypothetical protein JCGZ_13914 [Jatropha curcas]
	VF03204	2881	23.9317	19.5498	16.6218	18.3118	17.1055	16.6494	Glycerol-3-phosphate acyltransferase 5 GN=GPAT5 OS=Arabidopsis thaliana (Mouse-ear cress) PE=1 SV=1	hypothetical protein JCGZ_20079 [Jatropha curcas]
	VF10737	2881	727.937	6.08054	2.59379	440.941	67.2242	1.17745	Probable glucan endo-1,3-beta-glucosidase A6 (Precursor) GN=A6 OS=Arabidopsis thaliana (Mouse-ear cress) PE=2 SV=1	hypothetical protein JCGZ_13143 [Jatropha curcas]
	VF16652	2881	43.3365	61.8147	66.9351	61.7903	63.2081	64.8363	ATP-dependent Clp protease proteolytic subunit 2, mitochondrial (Precursor) GN=MYJ24.13 OS=Arabidopsis thaliana (Mouse-ear cress) PE=1 SV=1	hypothetical protein JCGZ_23856 [Jatropha curcas]
	VF04639	2880	37.2453	25.9686	22.2874	26.8202	21.6809	23.8385	Glucan endo-1,3-beta-glucosidase 11 (Precursor) GN=At1g32860 OS=Arabidopsis thaliana (Mouse-ear cress) PE=1 SV=1	hypothetical protein JCGZ_13352 [Jatropha curcas]
	VF14101	2880	69.7996	52.3022	56.8088	63.2962	51.1691	45.1148	Zinc finger protein JACKDAW GN=F15A17.180 OS=Arabidopsis thaliana (Mouse-ear cress) PE=1 SV=1	hypothetical protein JCGZ_16490 [Jatropha curcas]
	VF12333	2879	173.663	148.544	124.425	149.463	140.888	123.31	30S ribosomal protein S31, chloroplastic (Precursor) GN=F16M14.7 OS=Arabidopsis thaliana (Mouse-ear cress) PE=1 SV=1	PREDICTED: 30S ribosomal protein S31, chloroplastic-like [Fragaria vesca subsp. vesca]
	VF00354	2878	28.0432	18.7751	16.101	25.014	16.6957	14.3257	Transcription factor EMB1444 GN=EMB1444 OS=Arabidopsis thaliana (Mouse-ear cress) PE=2 SV=1	hypothetical protein JCGZ_15317 [Jatropha curcas]
	VF08262	2878	4.83767	1.19156	1.051	3.64458	1.32667	0.785255	Inactive disease resistance protein RPS4 {ECO:0000303|PubMed:10571887} GN=RPS4 OS=Arabidopsis thaliana (Mouse-ear cress) PE=3 SV=1	hypothetical protein JCGZ_17198 [Jatropha curcas]
	VF13941	2878	25.3012	32.0023	34.4836	33.8696	33.8863	38.3296	Pyruvate kinase, cytosolic isozyme OS=Glycine max (Soybean) PE=1 SV=1	hypothetical protein JCGZ_16628 [Jatropha curcas]
	VF27667	2878	15.0099	9.11137	7.62973	11.034	7.90756	8.6863	AMSH-like ubiquitin thioesterase 2 GN=AMSH2 OS=Arabidopsis thaliana (Mouse-ear cress) PE=2 SV=1	amsh, putative [Ricinus communis]
	VF27831	2878	157.303	285.904	285.528	212.196	286.132	284.235	Proteasome subunit alpha type-3 GN=PAG1 OS=Spinacia oleracea (Spinach) PE=2 SV=1	hypothetical protein JCGZ_11060 [Jatropha curcas]
	VFNG3020	2878	8.18297	4.91161	5.29983	6.2414	5.12507	5.30058	Endonuclease OS=Nicotiana tabacum (Common tobacco) PE=2 SV=1	putative polyprotein [Solanum lycopersicum]
	VF03509	2876	60.24	140.202	127.441	102.293	126.938	129.703	--	hypothetical protein JCGZ_24753 [Jatropha curcas]
	VF25982	2876	98.6738	63.8322	64.0326	80.2725	62.3484	65.7497	#N/A	#N/A
	VF20871	2875	43.3125	25.4645	26.0127	32.6444	23.9953	26.574	Polycomb group protein VERNALIZATION 2 GN=VRN2 OS=Arabidopsis thaliana (Mouse-ear cress) PE=1 SV=2	polycomb protein embryonic flower, putative [Ricinus communis]
	VFNG1791	2875	9.53087	4.46563	4.94435	7.88539	4.82968	4.15696	--	--
	VF12777	2874	26.7963	19.3882	17.4357	23.2959	18.068	18.2034	--	hypothetical protein JCGZ_24577 [Jatropha curcas]
	VF13977	2874	41.8348	30.1279	24.1224	27.819	28.1394	17.6387	--	hypothetical protein JCGZ_23635 [Jatropha curcas]
	VF14210	2874	22.0361	17.213	15.8864	20.4961	17.2024	14.7044	--	conserved hypothetical protein [Ricinus communis]
	VF17488	2874	45.2243	69.7379	70.8425	56.7878	68.2562	68.8222	Glutamyl-tRNA reductase-binding protein, chloroplastic {ECO:0000303|PubMed:22180625} (Precursor) OS=Arabidopsis thaliana (Mouse-ear cress) PE=1 SV=1	hypothetical protein JCGZ_11919 [Jatropha curcas]
	VF24680	2874	1.9752	10.0123	7.63276	4.60624	9.53241	12.247	--	hypothetical protein JCGZ_17963 [Jatropha curcas]
	VF24978	2874	11.8497	5.39317	5.55058	8.6233	5.27226	5.76273	Putative F-box/LRR-repeat protein At3g58880 GN=At3g58880 OS=Arabidopsis thaliana (Mouse-ear cress) PE=3 SV=1	ubiquitin-protein ligase, putative [Ricinus communis]
	VF26569	2874	5.81597	1.97645	1.5325	4.16723	2.16419	1.84647	Putative F-box protein PP2-B12 GN=PP2B12 OS=Arabidopsis thaliana (Mouse-ear cress) PE=3 SV=1	PREDICTED: putative F-box protein PP2-B12 isoform X2 [Populus euphratica]
	VFNG4550	2874	2.31626	1.23046	1.03814	1.83719	1.2386	1.1484	Endonuclease OS=Nicotiana tabacum (Common tobacco) PE=2 SV=1	hypothetical protein VITISV_021034 [Vitis vinifera]
	VF05779	2873	4.22706	2.86628	2.95871	3.67463	2.64007	2.75528	Putative disease resistance RPP13-like protein 1 GN=RPPL1 OS=Arabidopsis thaliana (Mouse-ear cress) PE=3 SV=1	leucine-rich repeat-containing protein, putative [Ricinus communis]
	VF21468	2873	156.718	110.2	121.89	116.336	120.951	94.1415	AP-2 complex subunit sigma GN=AP17 OS=Arabidopsis thaliana (Mouse-ear cress) PE=2 SV=1	PREDICTED: AP-2 complex subunit sigma-like [Fragaria vesca subsp. vesca]
	VF21874	2872	23.7002	15.4067	14.3091	20.9433	17.151	12.0601	--	hypothetical protein JCGZ_16774 [Jatropha curcas]
	VF22126	2872	131.283	153.743	161.376	158.365	169.692	170.385	Clathrin heavy chain 1 GN=CHC1 OS=Arabidopsis thaliana (Mouse-ear cress) PE=1 SV=1	hypothetical protein JCGZ_01239 [Jatropha curcas]
	VFNG1383	2872	37.7446	50.3719	48.1589	45.9892	49.0565	48.6782	Serine/arginine-rich splicing factor RSZ22A GN=F25P17.11 OS=Arabidopsis thaliana (Mouse-ear cress) PE=1 SV=1	arginine/serine-rich splicing factor, putative [Ricinus communis]
	VFNG5366	2872	66.3604	34.8443	40.3154	51.5489	43.7955	37.6216	Actin-related protein 3 GN=F3F19.20 OS=Arabidopsis thaliana (Mouse-ear cress) PE=1 SV=1	hypothetical protein CICLE_v100319541mg, partial [Citrus clementina]
	VF12442	2871	19.9995	11.1836	10.2668	15.9644	12.7285	10.9419	--	hypothetical protein JCGZ_26654 [Jatropha curcas]
	VF14423	2871	5.31311	1.82423	2.1257	2.14407	1.63493	1.74412	Putative pentatricopeptide repeat-containing protein At4g17915 GN=At4g17915 OS=Arabidopsis thaliana (Mouse-ear cress) PE=3 SV=1	pentatricopeptide repeat-containing protein, putative [Ricinus communis]
	VF24160	2870	58.4774	30.8969	30.1397	47.5069	39.8928	26.8426	--	hypothetical protein JCGZ_20529 [Jatropha curcas]
	VFNG2825	2870	36.5764	21.4535	17.0377	21.4907	21.4521	18.8362	Uncharacterized mitochondrial protein AtMg00310 GN=AtMg00310 OS=Arabidopsis thaliana (Mouse-ear cress) PE=4 SV=1	RNA-directed DNA polymerase (Reverse transcriptase) [Medicago truncatula]
	VF13209	2867	37.0606	22.2684	22.2769	30.6306	22.2631	22.7044	--	hypothetical protein JCGZ_18822 [Jatropha curcas]
	VF22690	2867	7.564	5.78872	4.04545	6.16976	4.52163	3.78034	Disease resistance protein RPS4 {ECO:0000303|PubMed:10571887} OS=Arabidopsis thaliana (Mouse-ear cress) PE=1 SV=1	hypothetical protein JCGZ_19531 [Jatropha curcas]
	VF27587	2867	24.6338	9.6563	14.3712	12.6308	11.9369	9.1456	--	hypothetical protein JCGZ_06325 [Jatropha curcas]
	VF13817	2866	63.7048	41.0558	45.0326	47.0434	50.2001	38.4731	--	unnamed protein product [Vitis vinifera]
	VF15418	2866	461.73	974.752	1217.74	774.787	931.949	1148.82	Peroxiredoxin-2B GN=F12P19.14 OS=Arabidopsis thaliana (Mouse-ear cress) PE=1 SV=1	peroxiredoxin, putative [Ricinus communis]
	VF19453	2866	12.9644	10.095	10.2886	10.9384	11.13	10.0697	--	hypothetical protein JCGZ_21950 [Jatropha curcas]
	VF23613	2866	2.48914	1.33415	1.65777	1.57781	1.50802	1.36613	Pentatricopeptide repeat-containing protein At3g50420 GN=PCMP-E85 OS=Arabidopsis thaliana (Mouse-ear cress) PE=2 SV=1	hypothetical protein JCGZ_12323 [Jatropha curcas]
	VF08701	2865	15.1582	7.93529	3.24283	5.7666	5.73765	3.22027	--	PREDICTED: uncharacterized protein LOC105140247 [Populus euphratica]
	VF09327	2864	40.2008	31.0838	31.8291	31.7455	33.9149	27.3378	Outer envelope pore protein 16-2, chloroplastic OS=Arabidopsis thaliana (Mouse-ear cress) PE=1 SV=1	hypothetical protein JCGZ_18975 [Jatropha curcas]
	VFNG952	2864	23.8426	29.7215	35.7622	29.9476	32.6735	34.8276	Folylpolyglutamate synthase {ECO:0000250|UniProtKB:Q05932, ECO:0000312|EMBL:CAC80839.2} GN=K18J17.17 OS=Arabidopsis thaliana (Mouse-ear cress) PE=1 SV=1	Disease resistance protein RPP8, putative [Ricinus communis]
	VF09315	2863	3.21988	0.608512	0.0801547	2.28471	0.460715	0.0949431	3-oxo-Delta(4,5)-steroid 5-beta-reductase GN=T22A6.50 OS=Arabidopsis thaliana (Mouse-ear cress) PE=1 SV=1	PREDICTED: 3-oxo-Delta(4,5)-steroid 5-beta-reductase-like [Vitis vinifera]
	VF17873	2863	54.3225	24.4665	18.8893	35.3911	9.82429	17.7675	Patatin-like protein 2 GN=PLP2 OS=Arabidopsis thaliana (Mouse-ear cress) PE=1 SV=1	Patatin T5 precursor, putative [Ricinus communis]
	VFNG453	2863	2.90606	9.79314	8.91618	4.96235	9.69263	10.4889	TMV resistance protein N GN=N OS=Nicotiana glutinosa (Tobacco) PE=1 SV=1	hypothetical protein JCGZ_20185 [Jatropha curcas]
	VF06446	2862	36.4168	25.7018	28.3268	31.8655	23.1261	21.8572	Transcription factor GTE12 GN=GTE12 OS=Arabidopsis thaliana (Mouse-ear cress) PE=2 SV=2	bromodomain-containing protein, putative [Ricinus communis]
	VF08461	2862	34.5282	23.0214	22.208	23.808	25.2311	21.7635	--	hypothetical protein RCOM_0561550 [Ricinus communis]
	VF14442	2862	82.7455	40.468	40.1927	54.0353	37.9418	43.9877	Proteasome activator subunit 4 GN=PA200 OS=Arabidopsis thaliana (Mouse-ear cress) PE=2 SV=2	hypothetical protein JCGZ_09542 [Jatropha curcas]
	VF24675	2862	8.97404	4.47218	4.74451	7.38835	3.31258	3.38032	--	hypothetical protein JCGZ_17958 [Jatropha curcas]
	VF11130	2861	27.848	18.2994	19.2948	22.6714	19.6445	19.6065	--	conserved hypothetical protein [Ricinus communis]
	VF20167	2861	13.6136	26.9074	27.0349	18.21	30.6464	30.5546	Membrane-associated progesterone-binding protein 4 {ECO:0000303|Ref.6} OS=Arabidopsis thaliana (Mouse-ear cress) PE=2 SV=1	hypothetical protein JCGZ_18131 [Jatropha curcas]
	VF02982	2858	27.8155	13.9607	14.3521	21.3837	16.1989	15.1796	Frataxin, mitochondrial (Precursor) GN=FH OS=Arabidopsis thaliana (Mouse-ear cress) PE=2 SV=2	hypothetical protein JCGZ_19760 [Jatropha curcas]
	VF09820	2858	37.8362	58.9289	71.8146	47.8211	70.4074	74.9656	Putative 3,4-dihydroxy-2-butanone kinase GN=DHBK OS=Solanum lycopersicum (Tomato) PE=2 SV=1	hypothetical protein JCGZ_26536 [Jatropha curcas]
	VF21977	2858	200.414	257.178	307.107	273.759	279.728	329.153	Outer envelope pore protein 16-3, chloroplastic/mitochondrial GN=T24P15.12 OS=Arabidopsis thaliana (Mouse-ear cress) PE=1 SV=1	hypothetical protein JCGZ_25515 [Jatropha curcas]
	VF09564	2857	26.7725	18.9576	18.2364	20.2731	20.9181	13.3605	--	PREDICTED: uncharacterized protein LOC105138237 [Populus euphratica]
	VF12938	2857	122.051	0.814243	0.598326	75.772	6.39893	0.838181	Pectinesterase QRT1 (Precursor) GN=MDF20.3 OS=Arabidopsis thaliana (Mouse-ear cress) PE=2 SV=1	hypothetical protein JCGZ_01017 [Jatropha curcas]
	VF25786	2857	19.8742	13.471	14.2542	13.1162	12.2956	10.5356	Serine/threonine-protein kinase CDL1 {ECO:0000305} OS=Arabidopsis thaliana (Mouse-ear cress) PE=1 SV=1	receptor serine-threonine protein kinase, putative [Ricinus communis]
	VFNG98	2857	9.40938	5.45702	5.62695	8.41735	5.15837	4.13128	--	PREDICTED: uncharacterized protein LOC105140209, partial [Populus euphratica]
	VF00599	2856	1.03876	9.58371	9.25629	3.45253	8.24284	10.8068	18.5 kDa class I heat shock protein GN=HSP18.5-C OS=Glycine max (Soybean) PE=3 SV=1	heat-shock protein, putative [Ricinus communis]
	VF18690	2856	62.6703	34.2053	32.6805	31.1882	27.0478	10.7347	Floral homeotic protein APETALA 2 GN=AP2 OS=Arabidopsis thaliana (Mouse-ear cress) PE=1 SV=1	JHL03K20.2 [Jatropha curcas]
	VF05710	2855	18.8933	11.2199	10.9396	13.5823	14.2124	7.62433	Transcriptional activator DEMETER GN=T32M21.160/T32M21.170/T32M21.180 OS=Arabidopsis thaliana (Mouse-ear cress) PE=1 SV=2	conserved hypothetical protein [Ricinus communis]
	VF08716	2855	156.55	105.377	120.123	139.627	104.977	94.2604	Pescadillo homolog {ECO:0000255|HAMAP-Rule:MF_03028} GN=CHLREDRAFT_206018 OS=Chlamydomonas reinhardtii (Chlamydomonas smithii) PE=1 SV=1	hypothetical protein JCGZ_10263 [Jatropha curcas]
	VF02930	2854	6.46399	4.41066	4.17314	4.44134	4.27802	2.44129	Putative pentatricopeptide repeat-containing protein At1g09680 GN=At1g09680 OS=Arabidopsis thaliana (Mouse-ear cress) PE=3 SV=1	pentatricopeptide repeat-containing family protein [Populus trichocarpa]
	VF05475	2854	152.851	26.8066	64.6805	62.7507	16.5678	29.8188	#N/A	#N/A
	VF03103	2852	86.6982	135.131	140.147	104.443	122.1	156.676	AP-1 complex subunit sigma-2 GN=AAP19-2 OS=Arabidopsis thaliana (Mouse-ear cress) PE=2 SV=1	hypothetical protein JCGZ_10776 [Jatropha curcas]
	VF13212	2852	389.19	167.682	132.626	263.226	174.752	174.681	Heavy metal-associated isoprenylated plant protein 26 (Precursor) GN=F20M13.140 OS=Arabidopsis thaliana (Mouse-ear cress) PE=1 SV=1	hypothetical protein JCGZ_18824 [Jatropha curcas]
	VF26696	2852	18480.4	10133.9	8407.11	8113.81	6137.46	4669.08	--	hypothetical protein POPTR_0002s08370g [Populus trichocarpa]
	VFNG3410	2852	6.25774	3.60162	3.81548	3.95181	3.31995	3.63978	#N/A	#N/A
	VF16173	2851	23.0761	16.7403	13.8965	20.435	15.7049	14.21	Rubisco accumulation factor 2, chloroplastic (Precursor) GN=RAF2 OS=Arabidopsis thaliana (Mouse-ear cress) PE=1 SV=1	hypothetical protein JCGZ_23533 [Jatropha curcas]
	VF07798	2850	17.8581	8.82439	9.96686	10.6457	9.1848	9.6051	Disease resistance protein RPS4 {ECO:0000303|PubMed:19519800} OS=Arabidopsis thaliana (Mouse-ear cress) PE=2 SV=1	hypothetical protein POPTR_0007s04750g [Populus trichocarpa]
	VF13348	2850	16.6751	8.10583	9.22316	14.444	9.18205	6.4592	DNA-directed RNA polymerase 3, chloroplastic (Precursor) GN=F27D4.3 OS=Arabidopsis thaliana (Mouse-ear cress) PE=2 SV=1	PREDICTED: DNA-directed RNA polymerase 3, chloroplastic [Populus euphratica]
	VF16113	2850	49.9022	85.7383	76.375	62.204	80.3794	85.6465	Probable ribose-5-phosphate isomerase 3, chloroplastic (Precursor) OS=Arabidopsis thaliana (Mouse-ear cress) PE=1 SV=1	hypothetical protein JCGZ_23484 [Jatropha curcas]
	VF16217	2850	9.12184	12.9229	12.8233	13.4148	13.8758	15.1717	--	PREDICTED: uncharacterized protein LOC105133898 isoform X1 [Populus euphratica]
	VF02531	2849	42.5087	29.2669	29.1995	30.4381	24.388	16.8965	Retinoblastoma-related protein GN=RBR OS=Ricinus communis (Castor bean) PE=2 SV=1	hypothetical protein JCGZ_03096 [Jatropha curcas]
	VF04294	2849	0.212958	23.4799	23.7485	13.2396	18.9357	21.026	--	hypothetical protein JCGZ_01728 [Jatropha curcas]
	VF16891	2849	28.4412	20.4706	21.6125	24.3055	17.0769	15.7877	--	hypothetical protein JCGZ_08980 [Jatropha curcas]
	VF19377	2849	246.386	413.924	507.988	360.082	479.159	469.473	Eukaryotic translation initiation factor 5A OS=Manihot esculenta (Cassava) PE=2 SV=2	Eukaryotic translation initiation factor 5A-1 [Theobroma cacao]
	VF23987	2848	31.8493	56.4367	61.6576	38.8661	58.6252	66.4826	Hydroxyphenylpyruvate reductase GN=HPPR OS=Plectranthus scutellarioides (Coleus) PE=1 SV=2	hypothetical protein JCGZ_06301 [Jatropha curcas]
	VF03545	2847	7.64934	0.62176	0.566462	5.15433	0.924284	0.446136	17.6 kDa class I heat shock protein 3 GN=HSP17.6C OS=Arabidopsis thaliana (Mouse-ear cress) PE=2 SV=2	PREDICTED: 17.4 kDa class I heat shock protein-like [Eucalyptus grandis]
	VF08182	2847	5.1009	3.74067	3.87868	3.89407	3.23254	2.71905	G-type lectin S-receptor-like serine/threonine-protein kinase At1g34300 (Precursor) GN=At1g34300 OS=Arabidopsis thaliana (Mouse-ear cress) PE=2 SV=1	hypothetical protein JCGZ_16686 [Jatropha curcas]
	VFNG1231	2847	49.1737	14.2832	14.5448	11.9974	11.2814	7.01502	#N/A	#N/A
	VF05502	2846	21.9697	10.0352	8.97663	9.25384	6.83486	7.5084	DnaJ protein ERDJ3B (Precursor) GN=F26K9.30 OS=Arabidopsis thaliana (Mouse-ear cress) PE=1 SV=1	hypothetical protein CISIN_1g032533mg [Citrus sinensis]
	VF14281	2846	4.25524	1.96327	2.65455	3.4969	1.98401	1.30283	U-box domain-containing protein 2 GN=PUB2 OS=Arabidopsis thaliana (Mouse-ear cress) PE=2 SV=1	conserved hypothetical protein [Ricinus communis]
	VF18613	2846	31.7629	23.0999	21.2489	24.0054	22.7537	13.7236	Serine/threonine protein phosphatase 2A regulatory subunit B&apos;&apos;alpha GN=B&apos;&apos;ALPHA OS=Arabidopsis thaliana (Mouse-ear cress) PE=1 SV=1	hypothetical protein JCGZ_17666 [Jatropha curcas]
	VF04511	2845	15.17	2.08529	1.14008	2.12423	1.84763	0.890508	#N/A	#N/A
	VF10742	2845	21.8564	16.5841	17.5761	19.444	18.2089	17.0868	E3 ubiquitin-protein ligase listerin GN=At5g58410 OS=Arabidopsis thaliana (Mouse-ear cress) PE=3 SV=1	conserved hypothetical protein [Ricinus communis]
	VF20728	2845	2.56643	0.495767	0.751468	1.64543	1.35313	0.29961	Mitogen-activated protein kinase kinase kinase ANP1 GN=ANP1 OS=Arabidopsis thaliana (Mouse-ear cress) PE=1 SV=2	hypothetical protein JCGZ_26976 [Jatropha curcas]
	VF25251	2845	19.0738	10.4543	7.21917	15.418	10.7423	7.75909	Oligopeptide transporter 1 GN=OPT1 OS=Arabidopsis thaliana (Mouse-ear cress) PE=2 SV=1	hypothetical protein JCGZ_01053 [Jatropha curcas]
	VF12865	2844	124.271	96.0793	94.1871	116.204	101.239	88.7053	U2 small nuclear ribonucleoprotein A&apos; GN=At1g09760 OS=Arabidopsis thaliana (Mouse-ear cress) PE=2 SV=2	hypothetical protein JCGZ_23057 [Jatropha curcas]
	VF21399	2844	4.08171	7.1653	6.58049	6.3931	6.86579	6.83652	Somatic embryogenesis receptor kinase 1 (Precursor) OS=Arabidopsis thaliana (Mouse-ear cress) PE=1 SV=2	hypothetical protein JCGZ_02124 [Jatropha curcas]
	VF04655	2843	69.5595	33.8707	32.5899	58.4805	39.9665	29.8846	--	PREDICTED: ribosomal RNA small subunit methyltransferase nep-1-like [Beta vulgaris subsp. vulgaris]
	VF14137	2843	6.60938	4.90216	4.03982	5.89884	4.70205	3.34293	Pentatricopeptide repeat-containing protein At5g02830, chloroplastic (Precursor) GN=At5g02830 OS=Arabidopsis thaliana (Mouse-ear cress) PE=2 SV=3	hypothetical protein JCGZ_16448 [Jatropha curcas]
	VF24058	2842	4.5037	2.6827	1.06794	2.84422	1.54771	1.4345	--	PREDICTED: uncharacterized protein LOC104882088 isoform X1 [Vitis vinifera]
	VFNG1808	2842	3.49334	11.6677	10.9314	6.47195	10.3474	11.3962	#N/A	#N/A
	VF00681	2841	24.7865	13.0946	14.0128	20.3185	15.867	13.5665	Zinc finger AN1 and C2H2 domain-containing stress-associated protein 11 GN=SAP11 OS=Arabidopsis thaliana (Mouse-ear cress) PE=2 SV=1	hypothetical protein JCGZ_21077 [Jatropha curcas]
	VF20636	2841	13.4283	9.80033	8.36563	12.0479	9.7858	8.35895	Probable LRR receptor-like serine/threonine-protein kinase At1g12460 (Precursor) GN=At1g12460 OS=Arabidopsis thaliana (Mouse-ear cress) PE=2 SV=1	hypothetical protein JCGZ_20726 [Jatropha curcas]
	VF11701	2840	26.0318	14.441	11.2437	20.8515	13.632	12.8963	Dynein assembly factor with WDR repeat domains 1 GN=DAW1 OS=Chlamydomonas reinhardtii (Chlamydomonas smithii) PE=1 SV=1	nucleotide binding protein, putative [Ricinus communis]
	VF15249	2840	37.1596	31.0461	32.152	31.1951	31.8068	28.4324	Aspartic proteinase Asp1 (Precursor) GN=OsJ_031884 OS=Oryza sativa subsp. japonica (Rice) PE=2 SV=1	hypothetical protein JCGZ_25323 [Jatropha curcas]
	VF16158	2840	8.09975	0.307377	0.101607	5.39317	0.761322	0	Phosphoribosylaminoimidazole carboxylase, chloroplastic (Precursor; Fragment) GN=PURKE OS=Vigna aconitifolia (Moth bean) PE=2 SV=1	Phosphoribosylaminoimidazole carboxylase family protein [Populus trichocarpa]
	VF01764	2839	48.398	24.4657	24.7397	27.5099	21.2715	24.8271	KH domain-containing protein At2g38610 GN=At2g38610 OS=Arabidopsis thaliana (Mouse-ear cress) PE=1 SV=1	hypothetical protein JCGZ_17280 [Jatropha curcas]
	VF12194	2839	24.6369	15.4708	15.1935	20.4301	17.8579	15.7498	Transcription factor GTE6 GN=GTE6 OS=Arabidopsis thaliana (Mouse-ear cress) PE=2 SV=1	hypothetical protein JCGZ_00235 [Jatropha curcas]
	VF12749	2839	239.527	185.248	182.966	224.324	192.294	156.321	Proteasome subunit alpha type-5 GN=PAE1 OS=Glycine max (Soybean) PE=1 SV=1	PREDICTED: proteasome subunit alpha type-5 [Nelumbo nucifera]
	VF07870	2838	156.894	87.4187	90.5387	125.009	84.611	91.6254	Katanin p60 ATPase-containing subunit A1 {ECO:0000255|HAMAP-Rule:MF_03023} GN=At1g80350 OS=Arabidopsis thaliana (Mouse-ear cress) PE=1 SV=1	hypothetical protein JCGZ_18153 [Jatropha curcas]
	VF10476	2838	4.03009	2.88736	2.29705	2.83745	2.44241	2.54823	Jacalin-related lectin 4 GN=JAL4 OS=Arabidopsis thaliana (Mouse-ear cress) PE=2 SV=1	hypothetical protein JCGZ_15015 [Jatropha curcas]
	VF13956	2838	459.177	613.685	750.251	642.197	644.61	762.739	Enolase 1 GN=ENO1 OS=Hevea brasiliensis (Para rubber tree) PE=1 SV=1	RecName: Full=Enolase 1; AltName: Full=2-phospho-D-glycerate hydro-lyase 1; AltName: Full=2-phosphoglycerate dehydratase 1; AltName: Allergen=Hev b 9 [Hevea brasiliensis]
	VF20005	2837	56.2863	74.9259	81.2646	71.9039	83.4295	99.8529	--	hypothetical protein JCGZ_17210 [Jatropha curcas]
	VF03526	2836	44.9276	27.5255	27.7286	40.6208	27.5933	23.2274	Chaperonin CPN60-like 2, mitochondrial (Precursor) GN=At3g13860 OS=Arabidopsis thaliana (Mouse-ear cress) PE=2 SV=2	PREDICTED: LOW QUALITY PROTEIN: chaperonin CPN60-like 2, mitochondrial-like [Cucumis sativus]
	VF04876	2836	83.7686	115.454	124.91	98.108	127.174	124.163	Phospholipase D delta GN=PLDDELTA OS=Arabidopsis thaliana (Mouse-ear cress) PE=1 SV=2	hypothetical protein JCGZ_22331 [Jatropha curcas]
	VF12989	2836	6.7409	4.25152	4.00217	5.4127	3.84484	4.27743	--	--
	VF13379	2836	37.6468	24.842	17.9415	22.6044	19.1345	19.3818	--	hypothetical protein JCGZ_22757 [Jatropha curcas]
	VF27197	2836	32.9034	22.7176	23.9843	26.6829	24.0057	24.3508	--	hypothetical protein JCGZ_25960 [Jatropha curcas]
	VF28187	2836	0.351778	2.87402	2.10248	1.53172	2.36354	2.53894	--	hypothetical protein JCGZ_09918 [Jatropha curcas]
	VF02722	2835	17.9009	12.998	12.8865	12.3953	13.4396	10.4784	#N/A	#N/A
	VF17527	2835	20.1303	33.3147	37.9711	34.638	35.9991	48.5433	DELLA protein GAI1 GN=GAI1 OS=Vitis vinifera (Grape) PE=2 SV=1	hypothetical protein JCGZ_13266 [Jatropha curcas]
	VF22402	2835	25.2176	22.0088	22.5786	23.1739	21.1041	19.5158	Probable serine/threonine-protein kinase At4g35230 GN=At4g35230 OS=Arabidopsis thaliana (Mouse-ear cress) PE=1 SV=1	receptor protein kinase, putative [Ricinus communis]
	VF27909	2835	25.1755	17.4726	14.8965	19.8131	17.7888	16.994	Translation factor GUF1 homolog, chloroplastic {ECO:0000255|HAMAP-Rule:MF_03138} (Precursor) GN=OSTLU_15891 OS=Ostreococcus lucimarinus (strain CCE9901) PE=3 SV=1	JMS10C05.4 [Jatropha curcas]
	VFNG3317	2835	31.1444	14.2927	14.0967	14.952	16.3222	12.9665	#N/A	#N/A
	VF05029	2833	27.1328	10.6534	11.1127	15.2661	12.3475	12.7723	Peptidyl-prolyl cis-trans isomerase CYP26-2, chloroplastic (Precursor) GN=CYP26-2 OS=Arabidopsis thaliana (Mouse-ear cress) PE=2 SV=1	peptidyl-prolyl cis-trans isomerase cyclophilin-type family protein [Populus trichocarpa]
	VF16540	2832	22.1103	17.3883	15.1714	15.56	14.5663	12.7376	--	hypothetical protein JCGZ_12571 [Jatropha curcas]
	VF27888	2832	17.1634	12.7	12.3892	13.7987	11.2434	7.80506	--	hypothetical protein JCGZ_21097 [Jatropha curcas]
	VFNG3535	2832	3.15482	1.49866	0.891734	1.29342	0.970964	1.02084	#N/A	#N/A
	VF01515	2831	25.473	21.6786	20.4854	24.185	21.8728	20.2986	--	PREDICTED: uncharacterized protein LOC105115509 isoform X2 [Populus euphratica]
	VF08866	2831	7.40898	1.24162	1.41781	4.80623	0.566327	1.25864	Heat shock cognate 70 kDa protein 1 GN=HSC-I OS=Solanum lycopersicum (Tomato) PE=2 SV=1	heat shock protein, putative [Ricinus communis]
	VF18248	2831	15.1176	9.22965	10.9844	11.4054	9.42009	9.96303	Two-pore potassium channel 3 GN=F15J5.130 OS=Arabidopsis thaliana (Mouse-ear cress) PE=2 SV=1	hypothetical protein JCGZ_09776 [Jatropha curcas]
	VF19014	2831	36.668	17.1707	14.6804	23.8391	13.683	17.7008	--	conserved hypothetical protein [Ricinus communis]
	VFNG6091	2831	2.37847	1.56072	1.38807	1.88071	1.83636	1.40434	Probable inactive dual specificity protein phosphatase-like At4g18593 GN=At4g18593 OS=Arabidopsis thaliana (Mouse-ear cress) PE=2 SV=1	hypothetical protein JCGZ_16634 [Jatropha curcas]
	VF22832	2830	4.4145	1.08842	1.34877	3.24488	1.45032	1.17145	Subtilisin-like protease SDD1 {ECO:0000303|PubMed:10809670} (Precursor) OS=Arabidopsis thaliana (Mouse-ear cress) PE=2 SV=1	Cucumisin precursor, putative [Ricinus communis]
	VF25734	2830	72.323	57.8848	60.2964	60.67	56.713	47.0859	Adenylosuccinate synthetase 2, chloroplastic {ECO:0000255|HAMAP-Rule:MF_03125} (Precursor) OS=Ricinus communis (Castor bean) PE=3 SV=1	hypothetical protein JCGZ_21041 [Jatropha curcas]
	VF01917	2828	8.80929	6.65433	6.95364	6.60266	6.46751	5.39801	Sugar transporter ERD6-like 5 GN=At1g54730 OS=Arabidopsis thaliana (Mouse-ear cress) PE=2 SV=2	PREDICTED: sugar transporter ERD6-like 5 isoform X1 [Prunus mume]
	VF07290	2827	13.0551	5.90438	6.62117	8.02308	7.14316	6.93673	Pentatricopeptide repeat-containing protein At4g19440, chloroplastic (Precursor) GN=At4g19440 OS=Arabidopsis thaliana (Mouse-ear cress) PE=2 SV=2	hypothetical protein JCGZ_19479 [Jatropha curcas]
	VF14125	2827	24.3475	13.9977	16.4898	21.6072	14.735	11.7037	Pentatricopeptide repeat-containing protein At3g09650, chloroplastic (Precursor) GN=F11F8_24 OS=Arabidopsis thaliana (Mouse-ear cress) PE=2 SV=1	hypothetical protein JCGZ_16460 [Jatropha curcas]
	VF06914	2826	15.3565	6.7019	6.44011	10.3149	8.37107	7.69989	#N/A	#N/A
	VF21268	2826	29.5757	24.3474	25.1844	26.5994	21.9688	21.3136	--	conserved hypothetical protein [Ricinus communis]
	VF02849	2825	29.4654	19.6341	21.5332	25.6802	18.2696	18.9835	Hexaprenyldihydroxybenzoate methyltransferase, mitochondrial (Precursor) GN=F7F1.13 OS=Arabidopsis thaliana (Mouse-ear cress) PE=2 SV=2	hypothetical protein POPTR_0014s08880g [Populus trichocarpa]
	VF11270	2825	6.08771	4.67821	4.83188	5.378	4.06781	3.6798	Pentatricopeptide repeat-containing protein At2g44880 GN=PCMP-E9 OS=Arabidopsis thaliana (Mouse-ear cress) PE=2 SV=2	hypothetical protein JCGZ_14594 [Jatropha curcas]
	VF05219	2824	50.4876	60.9325	67.84	60.9456	71.0694	68.5048	Serine/threonine-protein phosphatase PP2A catalytic subunit GN=PP2A OS=Hevea brasiliensis (Para rubber tree) PE=2 SV=1	type 2A protein phosphatase-2 [Populus trichocarpa]
	VF06165	2824	8.75845	1.04465	0.711473	6.31788	1.39702	0.434634	--	hypothetical protein JCGZ_14310 [Jatropha curcas]
	VF17142	2824	2.14946	0.970629	0.844368	1.21768	1.38871	0.811289	Nuclear cap-binding protein subunit 1 GN=T10F5.8 OS=Arabidopsis thaliana (Mouse-ear cress) PE=1 SV=2	cap binding protein, putative [Ricinus communis]
	VF20656	2824	45.0194	48.9833	52.0299	49.7509	51.526	51.4032	Methylsterol monooxygenase 1-2 GN=SMO1-2 OS=Arabidopsis thaliana (Mouse-ear cress) PE=2 SV=1	hypothetical protein JCGZ_20744 [Jatropha curcas]
	VF21476	2824	42.0133	37.9711	38.0875	40.2153	36.0074	35.2251	--	hypothetical protein JCGZ_08211 [Jatropha curcas]
	VF08027	2823	16.3511	12.6867	11.4433	13.7905	12.3067	8.23639	Ras-related protein RIC2 OS=Oryza sativa subsp. japonica (Rice) PE=2 SV=2	PREDICTED: ras-related protein RIC2 [Brachypodium distachyon]
	VF19367	2823	56.3442	97.6264	100.199	67.7442	88.6578	111.793	Transmembrane 9 superfamily member 10 {ECO:0000305} (Precursor) OS=Arabidopsis thaliana (Mouse-ear cress) PE=2 SV=1	hypothetical protein JCGZ_04034 [Jatropha curcas]
	VF25522	2823	0.64069	6.61989	8.46042	6.25925	5.52646	7.91685	Uncharacterized protein At5g39865 GN=At5g39865 OS=Arabidopsis thaliana (Mouse-ear cress) PE=2 SV=1	hypothetical protein JCGZ_17381 [Jatropha curcas]
	VF26549	2823	12.094	68.6508	59.4457	30.6671	49.5078	75.1996	--	hypothetical protein JCGZ_10745 [Jatropha curcas]
	VF05666	2821	53.6536	29.1757	29.1841	36.1042	32.9963	32.1461	--	hypothetical protein JCGZ_12893 [Jatropha curcas]
	VF06096	2821	26.1303	37.4762	38.2843	29.8187	36.6811	38.3238	--	PREDICTED: uncharacterized protein LOC105124742 isoform X1 [Populus euphratica]
	VF23272	2821	61.564	75.2467	82.285	66.9821	82.4505	86.2242	1-acylglycerol-3-phosphate O-acyltransferase GN=At4g24160 OS=Arabidopsis thaliana (Mouse-ear cress) PE=1 SV=1	hypothetical protein JCGZ_04518 [Jatropha curcas]
	VF25570	2821	23.383	17.9362	16.864	16.8963	18.5037	14.8769	Uncharacterized aarF domain-containing protein kinase At1g79600, chloroplastic (Precursor) GN=At1g79600 OS=Arabidopsis thaliana (Mouse-ear cress) PE=2 SV=1	hypothetical protein JCGZ_23939 [Jatropha curcas]
	VF02457	2820	16.1761	8.99862	8.17423	10.8292	9.00319	9.55942	Protein LONGIFOLIA 2 OS=Arabidopsis thaliana (Mouse-ear cress) PE=1 SV=1	hypothetical protein JCGZ_19959 [Jatropha curcas]
	VF02894	2820	21.0587	14.7755	14.6502	16.027	15.5314	15.3107	Protein SCAR3 GN=SCAR3 OS=Arabidopsis thaliana (Mouse-ear cress) PE=1 SV=1	hypothetical protein JCGZ_21566 [Jatropha curcas]
	VF17837	2820	11.2404	24.7275	26.1369	18.6479	23.7911	23.6135	Probable transcription factor KAN4 GN=MFO20.5 OS=Arabidopsis thaliana (Mouse-ear cress) PE=1 SV=1	hypothetical protein JCGZ_04346 [Jatropha curcas]
	VF20651	2820	58.581	79.4578	83.5826	66.279	80.4749	81.993	ATP-dependent Clp protease proteolytic subunit-related protein 2, chloroplastic (Precursor) GN=F5O11.13 OS=Arabidopsis thaliana (Mouse-ear cress) PE=1 SV=1	ATP-dependent Clp protease proteolytic subunit, putative [Ricinus communis]
	VF22016	2818	28.2965	16.4339	18.0416	15.5445	13.8469	11.0848	--	hypothetical protein JCGZ_07802 [Jatropha curcas]
	VF04795	2817	15.3298	10.119	8.51757	12.9416	8.39706	8.94902	Lysine histidine transporter-like 5 GN=At1g71680 OS=Arabidopsis thaliana (Mouse-ear cress) PE=2 SV=2	hypothetical protein JCGZ_22403 [Jatropha curcas]
	VF10318	2816	23.5862	42.4472	47.2029	37.9813	42.7184	63.5768	E3 ubiquitin-protein ligase At1g12760 GN=At1g12760 OS=Arabidopsis thaliana (Mouse-ear cress) PE=1 SV=1	hypothetical protein JCGZ_20642 [Jatropha curcas]
	VF10782	2816	7.83231	6.31244	6.79214	6.48619	6.36325	5.79987	#N/A	#N/A
	VF11300	2816	52.5278	31.582	33.2038	29.8099	27.899	18.095	Nuclear pore complex protein NUP62 {ECO:0000303|PubMed:21189294} OS=Arabidopsis thaliana (Mouse-ear cress) PE=1 SV=1	hypothetical protein JCGZ_15753 [Jatropha curcas]
	VF11319	2816	159.812	304.959	316.199	326.562	328.131	346.463	Protein transport protein Sec61 subunit beta GN=At2g45070 OS=Arabidopsis thaliana (Mouse-ear cress) PE=1 SV=1	PREDICTED: protein transport protein Sec61 subunit beta [Cucumis melo]
	VF11336	2816	31.1278	21.2148	24.4103	23.8504	23.4228	16.8011	Calmodulin OS=Heterocapsa triquetra (Dinoflagellate) PE=2 SV=1	hypothetical protein JCGZ_14567 [Jatropha curcas]
	VF15862	2816	30.8176	19.0867	18.9337	22.7144	21.6308	20.4304	ATP-dependent DNA helicase Q-like 1 GN=F10A16.2 OS=Arabidopsis thaliana (Mouse-ear cress) PE=2 SV=1	hypothetical protein JCGZ_23244 [Jatropha curcas]
	VF18469	2815	72.1974	49.9942	55.4496	53.3586	42.4489	40.9783	Vacuolar cation/proton exchanger 5 OS=Arabidopsis thaliana (Mouse-ear cress) PE=2 SV=1	hypothetical protein JCGZ_13190 [Jatropha curcas]
	VF00672	2814	3.38101	0.97993	0.753725	2.19235	0.699294	1.06639	Probable leucine-rich repeat receptor-like protein kinase At5g49770 (Precursor) GN=At5g49770 OS=Arabidopsis thaliana (Mouse-ear cress) PE=2 SV=1	PREDICTED: probable leucine-rich repeat receptor-like protein kinase At5g49770 [Populus euphratica]
	VF25867	2814	14.2643	24.5509	20.8216	20.8039	22.4475	23.3653	50S ribosomal protein L10, chloroplastic (Precursor) GN=RPL10 OS=Nicotiana tabacum (Common tobacco) PE=2 SV=1	hypothetical protein JCGZ_15458 [Jatropha curcas]
	VF25179	2813	16.8928	11.9597	13.5393	13.1057	11.5786	9.56047	Chaperone protein ClpB3, chloroplastic (Precursor) GN=T20K14.60 OS=Arabidopsis thaliana (Mouse-ear cress) PE=2 SV=1	chaperone clpb, putative [Ricinus communis]
	VF06825	2812	60.7039	40.6768	40.8755	50.0735	48.8995	39.7408	Mediator of RNA polymerase II transcription subunit 31 GN=F28I16.60 OS=Arabidopsis thaliana (Mouse-ear cress) PE=1 SV=1	Mediator of RNA polymerase II transcription subunit 31 isoform 1 [Theobroma cacao]
	VF19409	2812	40.3953	17.2686	21.1598	20.6204	17.1574	18.2903	Auxin-binding protein T85 (Precursor) GN=T85 OS=Nicotiana tabacum (Common tobacco) PE=3 SV=1	hypothetical protein JCGZ_21987 [Jatropha curcas]
	VF02962	2811	16.6905	39.3077	45.162	24.9674	36.6304	44.2494	Phosphatase IMPL1, chloroplastic (Precursor) GN=IMPL1 OS=Arabidopsis thaliana (Mouse-ear cress) PE=1 SV=2	hypothetical protein JCGZ_00142 [Jatropha curcas]
	VF07986	2811	78.2977	47.1613	48.068	67.812	55.4323	46.2052	Trigger factor-like protein TIG, Chloroplastic (Precursor) GN=TIG OS=Arabidopsis thaliana (Mouse-ear cress) PE=2 SV=1	hypothetical protein JCGZ_00953 [Jatropha curcas]
	VF13294	2811	25.3287	11.9728	12.3559	17.9847	15.2961	13.7697	Uncharacterized protein At2g33490 GN=At2g33490 OS=Arabidopsis thaliana (Mouse-ear cress) PE=4 SV=2	conserved hypothetical protein [Ricinus communis]
	VF21890	2811	10.3346	18.3368	18.8169	15.6875	22.6222	26.8412	#N/A	#N/A
	VF28349	2811	74.6546	41.0921	41.7779	54.5719	43.1999	46.0884	K(+) efflux antiporter 6 GN=KEA6 OS=Arabidopsis thaliana (Mouse-ear cress) PE=2 SV=1	hypothetical protein JCGZ_07679 [Jatropha curcas]
	VFNG4665	2811	4.20057	1.63952	1.42774	2.41241	1.97557	1.90808	#N/A	#N/A
	VF06673	2810	201.878	262.286	298.226	269.989	262.099	290.471	--	hypothetical protein JCGZ_09368 [Jatropha curcas]
	VF14274	2810	11.3659	7.04057	5.74959	8.88943	7.08619	6.87029	--	hypothetical protein JCGZ_24501 [Jatropha curcas]
	VF01681	2809	430.359	858.245	873.819	808.348	859.501	839.555	40S ribosomal protein S14-3 GN=RPS14C OS=Arabidopsis thaliana (Mouse-ear cress) PE=2 SV=2	hypothetical protein JCGZ_12705 [Jatropha curcas]
	VF08133	2809	12.0868	8.95708	8.67343	10.9605	7.48432	6.73751	DEAD-box ATP-dependent RNA helicase 39 OS=Oryza sativa subsp. japonica (Rice) PE=2 SV=1	dead box ATP-dependent RNA helicase, putative [Ricinus communis]
	VF11095	2809	2.7396	0.866441	0.196995	0.955029	0.595501	0.656893	LRR receptor-like serine/threonine-protein kinase ERECTA {ECO:0000303|PubMed:8624444} (Precursor) OS=Arabidopsis thaliana (Mouse-ear cress) PE=1 SV=1	hypothetical protein POPTR_0006s06000g [Populus trichocarpa]
	VF22687	2809	98.6338	163.39	160.143	119.311	159.894	164.497	Probable calcium-binding protein CML49 GN=CML49 OS=Arabidopsis thaliana (Mouse-ear cress) PE=2 SV=1	hypothetical protein JCGZ_21125 [Jatropha curcas]
	VF26691	2809	57.9574	115.346	126.488	109.287	120.864	180.335	V-type proton ATPase subunit c4 GN=F10A5.17 OS=Arabidopsis thaliana (Mouse-ear cress) PE=2 SV=1	vacuolar ATP synthase proteolipid subunit 1, 2, 3, putative [Ricinus communis]
	VFNG1215	2809	13.899	6.87893	6.69276	10.6032	6.88422	7.49263	G-type lectin S-receptor-like serine/threonine-protein kinase RKS1 (Precursor) GN=RKS1 OS=Arabidopsis thaliana (Mouse-ear cress) PE=3 SV=3	hypothetical protein JCGZ_21315 [Jatropha curcas]
	VFNG3070	2809	7.75244	5.79498	5.63758	5.48959	5.13086	5.12747	#N/A	#N/A
	VFNG3998	2809	4.12002	2.27474	2.48778	2.6128	2.35269	2.44397	--	PREDICTED: pentatricopeptide repeat-containing protein At3g24000, mitochondrial-like [Populus euphratica]
	VF04829	2807	48.5422	22.3948	28.7198	32.0837	23.7798	26.405	--	hypothetical protein JCGZ_17529 [Jatropha curcas]
	VF11825	2807	5.61412	4.14433	3.06561	4.35238	4.17433	3.23356	--	conserved hypothetical protein [Ricinus communis]
	VF15858	2807	62.5244	52.7373	55.5367	55.8806	49.3916	48.5259	--	hypothetical protein JCGZ_23240 [Jatropha curcas]
	VF19104	2807	39.5135	19.794	23.5573	20.8243	16.8712	16.8982	Homeobox-leucine zipper protein HAT5 GN=F4P13.2 OS=Arabidopsis thaliana (Mouse-ear cress) PE=1 SV=1	hypothetical protein JCGZ_21706 [Jatropha curcas]
	VF27764	2807	17.3171	13.9872	11.4258	13.5426	12.8457	12.3139	Uncharacterized exonuclease domain-containing protein At3g15140 GN=At3g15140 OS=Arabidopsis thaliana (Mouse-ear cress) PE=2 SV=1	hypothetical protein JCGZ_15300 [Jatropha curcas]
	VF02795	2806	39.6831	30.5396	19.4297	28.7134	21.8932	16.8725	Chaperone protein dnaJ 1, mitochondrial (Precursor) GN=ATJ1 OS=Arabidopsis thaliana (Mouse-ear cress) PE=2 SV=2	hypothetical protein JCGZ_04688 [Jatropha curcas]
	VF26031	2806	13.7967	7.83691	8.40467	8.37004	8.17469	7.88613	--	conserved hypothetical protein [Ricinus communis]
	VFNG4480	2806	0.850848	2.21389	2.60207	2.69873	2.72926	3.20387	#N/A	#N/A
	VF03183	2805	7.76852	4.07513	0.962831	5.69557	1.94398	0.464449	Transcription factor MYB34 GN=MSL3.10 OS=Arabidopsis thaliana (Mouse-ear cress) PE=1 SV=1	hypothetical protein JCGZ_06720 [Jatropha curcas]
	VF16583	2805	8.82109	6.02207	6.29615	6.12565	6.88706	5.29391	Uncharacterized protein At2g39910 GN=At2g39910 OS=Arabidopsis thaliana (Mouse-ear cress) PE=2 SV=2	hypothetical protein JCGZ_01337 [Jatropha curcas]
	VF16790	2805	36.1971	23.6581	23.9335	22.5056	21.5272	20.6294	--	hypothetical protein JCGZ_10521 [Jatropha curcas]
	VF18819	2805	145.737	73.9282	48.3918	71.1878	62.8265	61.9583	--	PREDICTED: sorbin and SH3 domain-containing protein 2-like [Populus euphratica]
	VF25758	2805	54.2149	39.66	37.1436	44.3703	38.1718	40.3844	--	hypothetical protein JCGZ_22354 [Jatropha curcas]
	VF01740	2803	13.5023	7.10066	7.48489	11.7438	8.29248	6.59844	Serine/threonine-protein kinase KIPK GN=KIPK OS=Arabidopsis thaliana (Mouse-ear cress) PE=1 SV=1	serine/threonine protein kinase, putative [Ricinus communis]
	VF04935	2803	54.9087	32.8875	34.4846	45.1071	42.1588	27.174	Sister chromatid cohesion 1 protein 4 GN=SYN4 OS=Arabidopsis thaliana (Mouse-ear cress) PE=2 SV=1	hypothetical protein JCGZ_13409 [Jatropha curcas]
	VF14246	2803	43.9853	17.9742	23.2582	34.977	21.1085	19.739	Calmodulin-like protein 4 GN=CML4 OS=Arabidopsis thaliana (Mouse-ear cress) PE=2 SV=1	hypothetical protein JCGZ_24476 [Jatropha curcas]
	VF20245	2803	6.47277	4.14724	2.71452	5.04328	2.54293	2.79337	RNA-dependent RNA polymerase 1 GN=F10B6.19 OS=Arabidopsis thaliana (Mouse-ear cress) PE=2 SV=1	hypothetical protein POPTR_0010s11560g [Populus trichocarpa]
	VF00191	2802	53.3175	44.892	41.4685	43.9608	43.3166	34.6726	60S ribosomal protein L7-1 GN=RPL7A OS=Arabidopsis thaliana (Mouse-ear cress) PE=2 SV=1	hypothetical protein JCGZ_27007 [Jatropha curcas]
	VF11724	2802	39.8179	74.1901	78.697	73.106	86.3795	113.292	Golgi apparatus membrane protein-like protein ECHIDNA GN=ECH OS=Arabidopsis thaliana (Mouse-ear cress) PE=1 SV=1	Protein FAM18B, putative [Ricinus communis]
	VF20945	2802	4.99159	3.72181	3.83108	4.29039	3.03073	3.08943	Putative pentatricopeptide repeat-containing protein At5g08310, mitochondrial (Precursor) GN=At5g08310 OS=Arabidopsis thaliana (Mouse-ear cress) PE=3 SV=1	hypothetical protein JCGZ_10136 [Jatropha curcas]
	VF21312	2802	75.4617	107.18	128.866	90.2311	118.715	142.694	NADH dehydrogenase [ubiquinone] 1 alpha subcomplex subunit 8-B GN=At5g18800 OS=Arabidopsis thaliana (Mouse-ear cress) PE=1 SV=1	NADH dehydrogenase, putative [Ricinus communis]
	VF24600	2801	15.6723	9.00088	9.85025	9.24769	9.33089	8.48692	Serine/threonine protein phosphatase 2A 59 kDa regulatory subunit B&apos; eta isoform GN=B&apos;ETA OS=Arabidopsis thaliana (Mouse-ear cress) PE=2 SV=1	hypothetical protein JCGZ_17904 [Jatropha curcas]
	VF20313	2800	35.1244	15.942	16.8968	24.6644	20.7081	18.9072	Myb-related protein 3R-1 GN=MYB3R-1 OS=Arabidopsis thaliana (Mouse-ear cress) PE=2 SV=1	hypothetical protein JCGZ_09071 [Jatropha curcas]
	VF20831	2800	26.9667	37.0486	34.616	36.8182	35.7452	39.9515	Phospho-2-dehydro-3-deoxyheptonate aldolase 1, chloroplastic (Precursor) GN=OSJNBa0017N12.13 OS=Oryza sativa subsp. japonica (Rice) PE=2 SV=2	hypothetical protein JCGZ_03503 [Jatropha curcas]
	VFNG509	2800	1.73338	1.20245	0.883096	1.06291	1.11534	0.604685	Uncharacterized mitochondrial protein AtMg00310 GN=AtMg00310 OS=Arabidopsis thaliana (Mouse-ear cress) PE=4 SV=1	PREDICTED: uncharacterized protein LOC103341160 [Prunus mume]
	VF27102	2799	91.6011	121.438	143.877	117.546	153.347	162.631	Probable NADH dehydrogenase [ubiquinone] 1 alpha subcomplex subunit 5, mitochondrial (Precursor) GN=At5g52840 OS=Arabidopsis thaliana (Mouse-ear cress) PE=1 SV=1	NADH dehydrogenase, putative [Ricinus communis]
	VF24458	2798	4.72776	8.8694	9.25859	6.534	7.28661	10.2209	1,2-dihydroxy-3-keto-5-methylthiopentene dioxygenase 1 {ECO:0000255|HAMAP-Rule:MF_03154} GN=VIT_05s0020g04070 OS=Vitis vinifera (Grape) PE=3 SV=1	hypothetical protein JCGZ_02226 [Jatropha curcas]
	VF07845	2797	12.7789	3.64447	1.25633	9.90912	4.97986	0.33584	WUSCHEL-related homeobox 3 GN=T8O18.10 OS=Arabidopsis thaliana (Mouse-ear cress) PE=2 SV=1	hypothetical protein JCGZ_05620 [Jatropha curcas]
	VFNG2077	2797	736.922	350.844	393.453	510.849	390.189	420.666	#N/A	#N/A
	VF06841	2796	10.5502	7.28395	6.5423	6.1833	5.82474	4.92755	60S ribosomal protein L8 GN=RPL8 OS=Solanum lycopersicum (Tomato) PE=2 SV=1	hypothetical protein JCGZ_26311 [Jatropha curcas]
	VF18597	2796	7.77382	4.63345	1.76079	3.53943	2.66691	2.17372	Protein LIGHT-DEPENDENT SHORT HYPOCOTYLS 3 GN=T16B12.3 OS=Arabidopsis thaliana (Mouse-ear cress) PE=1 SV=1	hypothetical protein POPTR_0005s24730g [Populus trichocarpa]
	VFNG597	2796	18.7999	12.4112	12.8126	12.5064	10.9059	11.6224	Caffeoylshikimate esterase GN=CSE OS=Arabidopsis thaliana (Mouse-ear cress) PE=1 SV=1	hypothetical protein JCGZ_20037 [Jatropha curcas]
	VF09256	2795	20.8637	47.2366	49.5374	29.6404	40.1694	51.2231	--	hypothetical protein JCGZ_18904 [Jatropha curcas]
	VF12348	2795	9.74619	7.0721	6.14464	7.39934	6.86404	6.88886	#N/A	#N/A
	VF15536	2795	3.4013	2.41262	2.49261	3.14343	2.34383	2.2553	Pentatricopeptide repeat-containing protein At3g09040, mitochondrial (Precursor) GN=PCMP-E88 OS=Arabidopsis thaliana (Mouse-ear cress) PE=2 SV=1	pentatricopeptide repeat-containing protein, putative [Ricinus communis]
	VF25761	2795	5.45115	1.39972	1.49591	3.63667	0.756878	1.47272	LOB domain-containing protein 1 GN=F24B9.1 OS=Arabidopsis thaliana (Mouse-ear cress) PE=2 SV=1	PREDICTED: LOB domain-containing protein 1-like [Populus euphratica]
	VF10816	2794	24.8503	15.3557	13.3846	12.6134	10.3408	7.70205	1,4-dihydroxy-2-naphthoate polyprenyltransferase, chloroplastic (Precursor) GN=ABC4 OS=Arabidopsis thaliana (Mouse-ear cress) PE=1 SV=2	hypothetical protein JCGZ_24918 [Jatropha curcas]
	VF02378	2793	33.512	50.1374	57.6817	50.7598	49.0341	67.5006	--	hypothetical protein JCGZ_22791 [Jatropha curcas]
	VF04389	2793	18.742	15.9133	13.0118	15.2374	14.5366	11.6808	--	hypothetical protein JCGZ_08826 [Jatropha curcas]
	VF08689	2793	77.0684	35.6521	38.0322	61.0506	46.4611	38.5435	Protein RER1B GN=RER1B OS=Arabidopsis thaliana (Mouse-ear cress) PE=1 SV=2	hypothetical protein JCGZ_14960 [Jatropha curcas]
	VF20603	2793	14.4862	44.4443	53.483	37.5033	43.3961	77.9461	--	hypothetical protein JCGZ_11994 [Jatropha curcas]
	VF00669	2792	3.33355	0.951011	1.17117	2.56774	1.49324	1.0087	Probable leucine-rich repeat receptor-like protein kinase At5g49770 (Precursor) GN=At5g49770 OS=Arabidopsis thaliana (Mouse-ear cress) PE=2 SV=1	hypothetical protein POPTR_0004s24080g [Populus trichocarpa]
	VF09853	2792	28.2853	20.1734	16.1904	20.8219	21.5623	17.396	--	PREDICTED: uncharacterized protein LOC103435620 isoform X4 [Malus domestica]
	VF20664	2792	5.86653	10.8519	10.3839	7.49684	9.19689	11.1345	--	hypothetical protein JCGZ_20751 [Jatropha curcas]
	VF11209	2791	90.6718	166.572	209.52	161.05	178.039	184.049	Acyl carrier protein 1, mitochondrial (Precursor) GN=MTACP1 OS=Arabidopsis thaliana (Mouse-ear cress) PE=2 SV=1	hypothetical protein JCGZ_14679 [Jatropha curcas]
	VF10613	2790	24.2648	18.2458	17.4883	19.8728	20.0763	18.1659	Methylmalonate-semialdehyde dehydrogenase [acylating], mitochondrial (Precursor) OS=Arabidopsis thaliana (Mouse-ear cress) PE=2 SV=2	hypothetical protein JCGZ_09938 [Jatropha curcas]
	VF23524	2789	38.6437	23.9001	30.3834	30.7867	24.4072	23.844	#N/A	#N/A
	VF25574	2789	39.9734	6.00259	3.42383	29.0506	12.0364	3.68312	MLO-like protein 6 GN=MLO6 OS=Arabidopsis thaliana (Mouse-ear cress) PE=2 SV=2	Protein MLO, putative [Ricinus communis]
	VF07878	2788	110.161	206.715	244.031	140.704	241.762	258.546	NADH dehydrogenase [ubiquinone] 1 beta subcomplex subunit 9 GN=CIB22 OS=Arabidopsis thaliana (Mouse-ear cress) PE=1 SV=1	hypothetical protein JCGZ_19644 [Jatropha curcas]
	VFNG2083	2788	6.78768	0.0481625	0.0389184	2.37886	0.787369	1.10008	Apocytochrome f {ECO:0000255|HAMAP-Rule:MF_00610} (Precursor) OS=Phalaenopsis aphrodite subsp. formosana (Moth orchid) PE=3 SV=1	cytochrome f (chloroplast) [Trifolium glanduliferum]
	VFNG4965	2788	3.74846	1.8357	1.78027	2.72654	2.0751	2.10148	UPF0183 protein At3g51130 GN=At3g51130 OS=Arabidopsis thaliana (Mouse-ear cress) PE=2 SV=2	hypothetical protein MTR_5g021520 [Medicago truncatula]
	VF07619	2787	17.5691	13.8948	13.4365	16.1459	15.0256	13.3533	F-box protein At3g58530 GN=At3g58530 OS=Arabidopsis thaliana (Mouse-ear cress) PE=2 SV=1	hypothetical protein JCGZ_03035 [Jatropha curcas]
	VF08002	2787	65.203	43.4217	39.2697	56.249	50.222	32.8511	DNA topoisomerase 1 GN=TOP1 OS=Arabidopsis thaliana (Mouse-ear cress) PE=1 SV=1	DNA topoisomerase type I, putative [Ricinus communis]
	VF25334	2786	61.4314	103.419	111.511	75.293	99.3535	136.51	Developmental protein SEPALLATA 2 GN=F14P3.4 OS=Arabidopsis thaliana (Mouse-ear cress) PE=1 SV=1	hypothetical protein JCGZ_25593 [Jatropha curcas]
	VF12586	2785	21.7683	17.9399	16.7702	17.1367	16.9927	13.6815	Indole-3-acetaldehyde oxidase GN=F22J12.40 OS=Arabidopsis thaliana (Mouse-ear cress) PE=1 SV=2	aldehyde oxidase, putative [Ricinus communis]
	VF19762	2785	59.9239	46.5941	48.4858	46.9639	50.2153	41.0755	Protein CPR-5 GN=MXK3.16 OS=Arabidopsis thaliana (Mouse-ear cress) PE=1 SV=1	hypothetical protein JCGZ_09389 [Jatropha curcas]
	VF19965	2785	5.53841	3.29378	3.30122	2.95676	2.33477	1.81337	Pentatricopeptide repeat-containing protein At1g05670, mitochondrial (Precursor) GN=At1g05670 OS=Arabidopsis thaliana (Mouse-ear cress) PE=2 SV=1	pentatricopeptide repeat-containing protein, putative [Ricinus communis]
	VFNG3815	2785	4.83319	2.85865	2.66772	3.69242	2.64288	3.01193	Pentatricopeptide repeat-containing protein At2g33760 GN=PCMP-H6 OS=Arabidopsis thaliana (Mouse-ear cress) PE=3 SV=1	hypothetical protein JCGZ_21440 [Jatropha curcas]
	VF02238	2784	18.2167	11.1613	12.488	16.0948	9.75376	8.99708	--	conserved hypothetical protein [Ricinus communis]
	VF04958	2784	11.0832	7.11473	2.60325	7.54573	3.64859	1.59476	GDSL esterase/lipase At1g06990 (Precursor) GN=At1g06990 OS=Arabidopsis thaliana (Mouse-ear cress) PE=2 SV=2	GDSL-like Lipase/Acylhydrolase family protein, putative [Theobroma cacao]
	VF06819	2784	79.5421	95.5566	96.1213	96.5377	95.9041	109.214	Metacaspase-1 GN=T7I23.17 OS=Arabidopsis thaliana (Mouse-ear cress) PE=1 SV=1	hypothetical protein JCGZ_26328 [Jatropha curcas]
	VF09205	2783	8.19264	5.87808	4.35576	6.50024	5.67602	5.0811	Cytochrome c-type biogenesis ccda-like chloroplastic protein 2 (Precursor) GN=CCDA2 OS=Oryza sativa subsp. japonica (Rice) PE=3 SV=1	hypothetical protein JCGZ_00701 [Jatropha curcas]
	VF09761	2783	5.87798	3.56584	0.777641	3.53829	1.9365	0.27681	B3 domain-containing transcription factor VRN1 GN=VRN1 OS=Arabidopsis thaliana (Mouse-ear cress) PE=1 SV=1	hypothetical protein JCGZ_01499 [Jatropha curcas]
	VF14287	2783	80.1427	44.2542	37.5077	70.0539	44.5746	36.9462	--	hypothetical protein JCGZ_24511 [Jatropha curcas]
	VF17520	2783	33.7011	13.158	7.76112	11.8195	16.9515	7.32106	--	hypothetical protein POPTR_0014s14900g [Populus trichocarpa]
	VF26081	2783	68.2839	53.0975	49.5536	52.4417	51.8347	36.3829	--	Protein C14orf111, putative [Ricinus communis]
	VF09208	2782	21.4581	15.4007	16.6346	16.4596	12.9088	11.8337	Myosin-2 GN=MDK4.10 OS=Arabidopsis thaliana (Mouse-ear cress) PE=2 SV=1	myosin vIII, putative [Ricinus communis]
	VF13899	2782	26.9364	58.7301	66.9189	51.4508	66.4104	59.4235	Dihydrolipoyllysine-residue acetyltransferase component 4 of pyruvate dehydrogenase complex, chloroplastic (Precursor) GN=LTA2 OS=Arabidopsis thaliana (Mouse-ear cress) PE=2 SV=1	hypothetical protein JCGZ_18315 [Jatropha curcas]
	VFNG5116	2782	6.1816	5.39348	4.77866	5.65643	4.69352	4.66982	--	hypothetical protein [Beta vulgaris subsp. vulgaris]
	VF06015	2781	22.0612	14.1443	13.1835	15.576	11.2375	4.61798	--	hypothetical protein JCGZ_18669 [Jatropha curcas]
	VF19322	2781	3.73034	0	0	2.50968	0	0	#N/A	#N/A
	VF25819	2781	67.3743	34.9848	29.9541	55.0636	41.5476	32.864	--	hypothetical protein JCGZ_17447 [Jatropha curcas]
	VFNG5006	2781	2.27239	0.943425	0.817103	1.53666	0.639068	0.96713	Uncharacterized mitochondrial protein AtMg00310 GN=AtMg00310 OS=Arabidopsis thaliana (Mouse-ear cress) PE=4 SV=1	PREDICTED: LOW QUALITY PROTEIN: uncharacterized protein LOC103343662 [Prunus mume]
	VF16619	2780	5.30194	3.35277	3.67188	4.78027	3.84417	2.68812	Pentatricopeptide repeat-containing protein At1g28690, mitochondrial (Precursor) GN=PCMP-E34 OS=Arabidopsis thaliana (Mouse-ear cress) PE=2 SV=2	hypothetical protein JCGZ_21537 [Jatropha curcas]
	VF10666	2779	44.1483	32.8273	34.1898	40.5672	35.0179	33.3359	Small RNA degrading nuclease 3 GN=SDN3 OS=Arabidopsis thaliana (Mouse-ear cress) PE=1 SV=1	hypothetical protein JCGZ_12452 [Jatropha curcas]
	VF12655	2779	9.66184	14.3472	16.1828	11.0348	15.6729	16.9999	--	hypothetical protein JCGZ_05450 [Jatropha curcas]
	VF27015	2779	9.47051	7.5439	7.36674	8.92539	7.90556	7.22698	Pentatricopeptide repeat-containing protein At1g55630 GN=At1g55630 OS=Arabidopsis thaliana (Mouse-ear cress) PE=2 SV=1	pentatricopeptide repeat-containing protein, putative [Ricinus communis]
	VF07384	2778	13.3617	6.52052	6.3711	11.1647	6.33775	6.36915	1-acyl-sn-glycerol-3-phosphate acyltransferase 1, chloroplastic (Precursor) GN=At4g30580 OS=Arabidopsis thaliana (Mouse-ear cress) PE=2 SV=1	hypothetical protein JCGZ_04038 [Jatropha curcas]
	VF15755	2778	76.27	26.0185	25.0101	50.1702	37.3175	32.3629	--	hypothetical protein POPTR_0006s14550g [Populus trichocarpa]
	VF09908	2777	11.1632	7.98639	9.13124	9.27144	7.54157	6.35549	--	conserved hypothetical protein [Ricinus communis]
	VFNG2805	2777	24.7584	17.7849	18.0333	22.3831	20.1552	17.2817	Putative AC transposase OS=Zea mays (Maize) PE=2 SV=2	hypothetical protein JCGZ_05843 [Jatropha curcas]
	VF10790	2776	33.7582	20.149	24.0979	22.1991	19.8304	19.9102	Ubiquitin carboxyl-terminal hydrolase 13 GN=UBP13 OS=Arabidopsis thaliana (Mouse-ear cress) PE=1 SV=1	hypothetical protein JCGZ_24934 [Jatropha curcas]
	VF14410	2776	9.83659	8.12023	7.71644	8.18382	7.66737	5.96879	--	hypothetical protein JCGZ_08395 [Jatropha curcas]
	VF05635	2775	20.188	14.6926	10.98	17.3468	12.6621	11.9662	--	conserved hypothetical protein [Ricinus communis]
	VF08671	2775	32.1651	25.0564	26.2226	30.4907	26.6249	23.6412	--	hypothetical protein JCGZ_17360 [Jatropha curcas]
	VF23003	2775	22.6416	16.3446	16.4107	20.5901	18.1458	13.3233	--	hypothetical protein JCGZ_09654 [Jatropha curcas]
	VF24745	2775	12.1598	8.10035	8.94216	9.24489	7.76525	8.53629	Probable WRKY transcription factor 2 GN=WRKY2 OS=Arabidopsis thaliana (Mouse-ear cress) PE=2 SV=1	WRKY transcription factor 10 [Jatropha curcas]
	VF20927	2774	25.86	14.0928	15.6419	18.8232	18.2329	15.7937	F-box protein CPR30 GN=CPR30 OS=Arabidopsis thaliana (Mouse-ear cress) PE=1 SV=2	hypothetical protein JCGZ_13698 [Jatropha curcas]
	VF08100	2773	40.116	19.8436	20.9101	30.2152	26.0788	22.3334	Transcription factor bHLH74 GN=T27I1.15 OS=Arabidopsis thaliana (Mouse-ear cress) PE=1 SV=1	hypothetical protein JCGZ_15985 [Jatropha curcas]
	VF10224	2773	167.943	116.581	120.283	141.784	139.859	113.241	Probable small nuclear ribonucleoprotein G GN=At2g23930 OS=Arabidopsis thaliana (Mouse-ear cress) PE=2 SV=1	PREDICTED: probable small nuclear ribonucleoprotein G [Malus domestica]
	VF13679	2773	7.68175	3.26862	3.8872	5.47541	2.59854	3.57072	Probable nucleoredoxin 2 OS=Oryza sativa subsp. japonica (Rice) PE=2 SV=1	hypothetical protein JCGZ_17861 [Jatropha curcas]
	VF21340	2773	12.3554	9.76709	8.71696	11.5365	9.83995	8.23886	#N/A	#N/A
	VFNG1012	2773	3.68216	1.43713	0.783532	1.99803	2.01918	1.20458	--	PREDICTED: uncharacterized protein LOC104243009 [Nicotiana sylvestris]
	VF17226	2772	24.9935	15.9384	16.1691	17.7882	15.5339	16.9512	Probable mitochondrial intermediate peptidase, mitochondrial (Precursor) GN=MIP OS=Arabidopsis thaliana (Mouse-ear cress) PE=3 SV=1	hypothetical protein JCGZ_26232 [Jatropha curcas]
	VF24164	2772	37.0659	29.2077	29.3336	27.5481	27.2535	24.9538	E3 SUMO-protein ligase SIZ2 OS=Oryza sativa subsp. japonica (Rice) PE=2 SV=1	sumo ligase, putative [Ricinus communis]
	VFNG2057	2772	6.05203	1.2086	0.788342	4.49877	1.91292	0.996069	--	PREDICTED: uncharacterized protein LOC103489782 [Cucumis melo]
	VF03182	2771	25.4136	20.8453	21.189	20.3819	19.4999	19.4282	Pentatricopeptide repeat-containing protein At2g15690 GN=PCMP-H66 OS=Arabidopsis thaliana (Mouse-ear cress) PE=2 SV=2	pentatricopeptide repeat-containing protein, putative [Ricinus communis]
	VF07514	2771	35.0857	8.44269	9.16999	27.3165	5.99453	6.26392	--	hypothetical protein RCOM_0504460 [Ricinus communis]
	VF09029	2771	12.2615	35.2143	31.5425	36.7997	40.5335	44.219	Translation initiation factor IF-1, chloroplastic {ECO:0000255|HAMAP-Rule:MF_00075} OS=Coffea arabica (Arabian coffee) PE=3 SV=1	hypothetical protein JCGZ_00251 [Jatropha curcas]
	VF06901	2770	45.993	22.8929	23.5281	36.2482	26.7363	25.8881	--	hypothetical protein JCGZ_23034 [Jatropha curcas]
	VF12953	2770	9.08809	11.9818	11.0852	11.0982	10.7852	12.0205	--	hypothetical protein JCGZ_05213 [Jatropha curcas]
	VF05052	2769	19.9895	36.636	31.9318	24.4726	32.7739	38.665	Calcium-dependent protein kinase 22 GN=CPK22 OS=Arabidopsis thaliana (Mouse-ear cress) PE=3 SV=2	JHL10I11.9 [Jatropha curcas]
	VF14650	2769	11.2518	16.9465	14.8684	13.4991	17.263	17.4247	--	hypothetical protein JCGZ_12959 [Jatropha curcas]
	VF17197	2769	35.8422	12.2069	12.8918	23.1013	15.5257	16.3201	K(+) efflux antiporter 5 GN=KEA5 OS=Arabidopsis thaliana (Mouse-ear cress) PE=2 SV=1	hypothetical protein JCGZ_26205 [Jatropha curcas]
	VF17877	2769	102.915	164.56	226.058	178.646	178.339	223.107	Uncharacterized protein At1g47420, mitochondrial (Precursor) GN=At1g47420 OS=Arabidopsis thaliana (Mouse-ear cress) PE=1 SV=1	hypothetical protein JCGZ_04300 [Jatropha curcas]
	VF23847	2769	124.732	65.9751	20.0717	94.1876	52.7037	22.8433	Floral homeotic protein APETALA 1 GN=AP1 OS=Sinapis alba (White mustard) PE=2 SV=1	hypothetical protein JCGZ_15742 [Jatropha curcas]
	VF24672	2769	7.13979	5.37514	4.63546	6.59786	4.65571	3.70723	--	hypothetical protein JCGZ_11138 [Jatropha curcas]
	VF02649	2768	25.6865	10.8135	12.5009	20.1059	14.7151	12.4453	--	hypothetical protein JCGZ_21671 [Jatropha curcas]
	VF09754	2768	13.3206	11.338	9.70078	10.9079	8.91787	8.76513	--	Cysteine/Histidine-rich C1 domain family protein, putative [Theobroma cacao]
	VFNG3016	2767	3.29577	1.8729	2.29014	2.15188	1.99513	1.95866	Probable cytokinin riboside 5&apos;-monophosphate phosphoribohydrolase LOGL8 OS=Oryza sativa subsp. japonica (Rice) PE=2 SV=3	PREDICTED: uncharacterized protein LOC104908276 [Beta vulgaris subsp. vulgaris]
	VF12401	2766	31.5906	20.9096	25.2848	27.4178	23.7356	20.8601	Endoribonuclease Dicer homolog 3a GN=P0456E05.21 OS=Oryza sativa subsp. japonica (Rice) PE=2 SV=1	Ribonuclease III, putative [Ricinus communis]
	VF19924	2766	141.412	348.628	400.643	420.691	464.909	524.331	--	PREDICTED: uncharacterized protein LOC105110611 [Populus euphratica]
	VF20995	2766	119.986	56.6292	81.3342	75.8973	46.2039	47.4659	--	hypothetical protein JCGZ_01391 [Jatropha curcas]
	VF21662	2766	50.2973	68.4065	85.4847	62.7707	74.443	90.2145	#N/A	#N/A
	VF21910	2766	12.9543	6.66923	7.0143	9.42099	7.77587	7.8735	--	hypothetical protein JCGZ_12612 [Jatropha curcas]
	VF24619	2766	60.8042	81.4218	81.5576	65.2296	85.8045	91.0041	3-oxoacyl-[acyl-carrier-protein] reductase, chloroplastic (Precursor) GN=CLKR27 OS=Cuphea lanceolata (Cigar flower) PE=2 SV=1	beta-ketoacyl-ACP reductase [Vernicia fordii]
	VF18773	2765	26.7417	15.323	15.1334	21.135	18.3986	16.5667	Mediator of RNA polymerase II transcription subunit 19a GN=MXC9.19 OS=Arabidopsis thaliana (Mouse-ear cress) PE=1 SV=1	RNA binding protein, putative [Ricinus communis]
	VF02705	2764	4.33644	3.19332	2.26029	2.67421	2.18264	2.02421	--	hypothetical protein JCGZ_04617 [Jatropha curcas]
	VF06312	2764	23.3395	28.0055	31.3435	28.8755	33.0143	31.8963	E3 ubiquitin-protein ligase At4g11680 GN=At4g11680 OS=Arabidopsis thaliana (Mouse-ear cress) PE=2 SV=1	hypothetical protein JCGZ_14449 [Jatropha curcas]
	VFNG4496	2762	6.34889	2.4431	1.22419	2.99359	3.0317	2.1264	#N/A	#N/A
	VF13466	2761	17.3141	32.4618	28.8911	21.1936	29.0302	36.4403	Mitochondrial adenine nucleotide transporter ADNT1 OS=Arabidopsis thaliana (Mouse-ear cress) PE=2 SV=1	hypothetical protein JCGZ_20482 [Jatropha curcas]
	VF14289	2761	16.7105	9.12848	11.0288	13.6504	8.29238	9.20182	DNA-directed RNA polymerase V subunit 5C GN=T14E10.60 OS=Arabidopsis thaliana (Mouse-ear cress) PE=2 SV=1	hypothetical protein JCGZ_24513 [Jatropha curcas]
	VF19383	2761	20.0901	10.7199	11.5319	15.6307	13.1534	12.255	--	conserved hypothetical protein [Ricinus communis]
	VF25266	2761	31.6952	18.2719	18.2774	26.8434	22.3301	18.4126	Chaperone protein dnaJ 39 GN=T2K10.3 OS=Arabidopsis thaliana (Mouse-ear cress) PE=2 SV=2	hypothetical protein JCGZ_01067 [Jatropha curcas]
	VF07784	2760	12.0901	0.443867	0.130108	7.58648	3.19588	1.14682	Zinc finger A20 and AN1 domain-containing stress-associated protein 7 GN=SAP7 OS=Arabidopsis thaliana (Mouse-ear cress) PE=1 SV=1	hypothetical protein PRUPE_ppa021643mg [Prunus persica]
	VF02763	2759	88.1167	69.2581	43.9886	64.5556	53.1216	42.2924	CSC1-like protein ERD4 GN=ERD4 OS=Arabidopsis thaliana (Mouse-ear cress) PE=2 SV=1	hypothetical protein JCGZ_04662 [Jatropha curcas]
	VF07033	2759	278.537	488.093	553.982	381.488	464.946	503.503	Actin-7 GN=ACT7 OS=Arabidopsis thaliana (Mouse-ear cress) PE=1 SV=1	actin 1 [Panax ginseng]
	VF16696	2759	98.777	60.8423	74.7139	73.78	66.4641	65.9923	E3 ubiquitin-protein ligase RHF2A GN=RHF2A OS=Arabidopsis thaliana (Mouse-ear cress) PE=2 SV=1	hypothetical protein JCGZ_08720 [Jatropha curcas]
	VF22150	2759	21.1897	14.0306	16.2167	18.9259	13.8419	13.3645	Aspartic proteinase Asp1 (Precursor) GN=OsJ_031884 OS=Oryza sativa subsp. japonica (Rice) PE=2 SV=1	hypothetical protein JCGZ_05872 [Jatropha curcas]
	VFNG592	2759	15.401	11.8334	12.9144	13.5286	13.247	12.2113	#N/A	#N/A
	VF27795	2758	27.6135	20.8517	21.1805	21.3539	21.5124	20.9602	--	hypothetical protein JCGZ_15446 [Jatropha curcas]
	VF09014	2757	10.8913	28.6649	29.1563	32.94	31.2219	40.236	--	hypothetical protein CISIN_1g034055mg [Citrus sinensis]
	VF14337	2757	2.99792	6.85256	7.01813	4.32758	5.5102	7.33153	--	hypothetical protein JCGZ_25099 [Jatropha curcas]
	VF16538	2757	5.14135	0.686818	1.1336	2.92504	0.453039	1.25432	Growth-regulating factor 2 GN=GRF2 OS=Arabidopsis thaliana (Mouse-ear cress) PE=1 SV=1	hypothetical protein JCGZ_12570 [Jatropha curcas]
	VF10958	2756	2.94667	1.89021	1.8721	2.32493	1.90395	2.059	Transcription repressor MYB5 GN=MYB5 OS=Arabidopsis thaliana (Mouse-ear cress) PE=1 SV=1	Myb domain protein 5 isoform 1 [Theobroma cacao]
	VF05811	2755	38.5403	15.2154	15.5626	28.4882	20.8465	18.036	#N/A	#N/A
	VF07947	2754	11.7978	0	0.439646	8.51114	1.89165	0	--	PREDICTED: formin-like protein 6 [Sesamum indicum]
	VF15221	2754	13.9236	7.86139	9.53394	11.903	9.68244	8.14434	Histone-lysine N-methyltransferase ASHR1 GN=T13L16.8 OS=Arabidopsis thaliana (Mouse-ear cress) PE=2 SV=2	hypothetical protein JCGZ_12048 [Jatropha curcas]
	VF19516	2754	13.1155	27.8608	30.258	26.9733	25.3122	28.6739	50S ribosomal protein L24, chloroplastic GN=rpl24 OS=Rhodomonas salina (Cryptomonas salina) PE=3 SV=1	PREDICTED: 50S ribosomal protein L24, chloroplastic [Populus euphratica]
	VF22926	2754	4.91779	0.840623	0.570578	0.765127	0.375499	0.557413	--	monovalent cation:proton antiporter, putative [Ricinus communis]
	VF06880	2753	0.00067981	2.79799	2.00805	0.882015	1.83926	3.19005	--	hypothetical protein RCOM_0030010 [Ricinus communis]
	VF14112	2753	9.12495	5.78782	3.56829	6.84835	5.35589	4.70256	--	hypothetical protein JCGZ_16480 [Jatropha curcas]
	VF17274	2753	52.8266	24.0932	21.2983	37.4091	23.778	27.5092	--	hypothetical protein JCGZ_26272 [Jatropha curcas]
	VF20812	2753	4.20049	0.699381	1.70057	2.6697	2.09905	0.926938	Protein SENSITIVITY TO RED LIGHT REDUCED 1 GN=SRR1 OS=Arabidopsis thaliana (Mouse-ear cress) PE=2 SV=2	Protein SENSITIVITY TO RED LIGHT REDUCED, putative [Ricinus communis]
	VF27980	2753	18.5825	11.1282	12.9352	15.9401	10.0416	10.5745	--	hypothetical protein JCGZ_07192 [Jatropha curcas]
	VF01763	2752	246.549	433.923	512.227	424.837	605.923	691.576	Putative B3 domain-containing protein At5g58280 GN=At5g58280 OS=Arabidopsis thaliana (Mouse-ear cress) PE=3 SV=1	hypothetical protein JCGZ_17282 [Jatropha curcas]
	VF06454	2752	1.42457	6.54204	8.7813	4.68328	5.87226	7.34171	Scarecrow-like protein 9 GN=SCL9 OS=Arabidopsis thaliana (Mouse-ear cress) PE=2 SV=1	hypothetical protein JCGZ_01438 [Jatropha curcas]
	VF14279	2752	61.5096	49.7204	46.4072	48.8006	47.3446	35.2898	--	hypothetical protein JCGZ_24506 [Jatropha curcas]
	VF03737	2751	81.9437	18.6495	13.4418	7.8221	8.96087	1.65489	Ribosome-inactivating protein gelonin (Precursor) GN=GEL OS=Suregada multiflora (False lime) PE=1 SV=2	type 1 ribosomal inactivating protein [Jatropha curcas]
	VF23731	2751	24.6082	55.9615	60.7933	48.2104	55.1225	52.8366	--	conserved hypothetical protein [Ricinus communis]
	VF13874	2750	8.43105	4.86134	4.90725	7.38687	3.58777	3.51881	Transcription repressor OFP17 GN=OFP17 OS=Arabidopsis thaliana (Mouse-ear cress) PE=2 SV=1	conserved hypothetical protein [Ricinus communis]
	VF18963	2750	18.36	25.5359	24.0076	20.2052	23.5367	26.3544	Acyl-CoA-binding domain-containing protein 4 GN=ACBP4 OS=Arabidopsis thaliana (Mouse-ear cress) PE=1 SV=1	hypothetical protein JCGZ_01574 [Jatropha curcas]
	VF03053	2749	2.65587	5.04317	5.07693	3.315	4.61041	6.48458	Zinc finger protein 7 GN=ZFP7 OS=Arabidopsis thaliana (Mouse-ear cress) PE=2 SV=1	hypothetical protein JCGZ_16276 [Jatropha curcas]
	VF07654	2749	142.822	59.8599	68.4523	101.019	76.8317	76.364	Ubiquitin carboxyl-terminal hydrolase 12 GN=UBP12 OS=Arabidopsis thaliana (Mouse-ear cress) PE=1 SV=2	hypothetical protein JCGZ_03064 [Jatropha curcas]
	VF11893	2749	10.5309	4.79804	5.73865	8.87846	6.78476	4.22641	Topless-related protein 1 OS=Arabidopsis thaliana (Mouse-ear cress) PE=1 SV=3	hypothetical protein JCGZ_07132 [Jatropha curcas]
	VF07331	2748	17.2814	14.8989	14.279	15.1498	14.978	12.2182	--	hypothetical protein JCGZ_03429 [Jatropha curcas]
	VF10387	2748	26.2797	18.1658	13.0885	18.5169	16.9656	16.0533	--	hypothetical protein JCGZ_08288 [Jatropha curcas]
	VF28069	2748	26.222	16.0877	12.9747	17.5082	12.6221	15.4369	Probable cytokinin riboside 5&apos;-monophosphate phosphoribohydrolase LOGL10 OS=Oryza sativa subsp. japonica (Rice) PE=2 SV=1	carboxy-lyase, putative [Ricinus communis]
	VF23529	2747	11.9019	5.44039	5.15746	6.41047	4.62828	5.89312	--	hypothetical protein JCGZ_03758 [Jatropha curcas]
	VF24214	2747	44.674	36.4831	36.8002	39.163	30.9352	30.396	--	PREDICTED: uncharacterized protein LOC100258309 [Vitis vinifera]
	VF18050	2746	132.609	75.0645	74.2964	71.5848	72.4079	67.888	Thioredoxin domain-containing protein PLP3B GN=PLP3B OS=Arabidopsis thaliana (Mouse-ear cress) PE=2 SV=1	hypothetical protein JCGZ_17277 [Jatropha curcas]
	VF22636	2746	101.583	65.8139	74.6409	90.8356	73.9584	67.6541	DNA-directed RNA polymerase II subunit RPB7 OS=Glycine max (Soybean) PE=2 SV=1	hypothetical protein JCGZ_02928 [Jatropha curcas]
	VF24992	2746	172.921	136.978	144.946	138.43	142.135	132.779	26S proteasome non-ATPase regulatory subunit 6 homolog GN=RPN7 OS=Arabidopsis thaliana (Mouse-ear cress) PE=1 SV=1	hypothetical protein JCGZ_11347 [Jatropha curcas]
	VF01327	2745	31.8912	47.2659	51.43	50.352	47.3588	61.9851	Cell division topological specificity factor homolog, chloroplastic (Precursor) OS=Arabidopsis thaliana (Mouse-ear cress) PE=1 SV=1	hypothetical protein JCGZ_15664 [Jatropha curcas]
	VF04632	2745	103.946	66.2082	64.0494	94.7892	75.0138	56.3802	#N/A	#N/A
	VF23060	2745	11.5161	8.60792	8.73844	8.59546	9.30585	8.14659	--	hypothetical protein JCGZ_09713 [Jatropha curcas]
	VF21262	2744	2.73924	0.491483	0.235165	1.5355	0.845638	0.741036	Cullin-1 GN=CUL1 OS=Arabidopsis thaliana (Mouse-ear cress) PE=1 SV=1	conserved hypothetical protein [Ricinus communis]
	VF04415	2743	129.532	224.712	260.419	168.992	250.839	244.508	Ubiquitin-conjugating enzyme E2 variant 1D GN=F22O6.60 OS=Arabidopsis thaliana (Mouse-ear cress) PE=1 SV=1	Ubiquitin E2 variant 1D-4 [Theobroma cacao]
	VF06132	2742	90.1943	70.014	59.0554	63.8135	62.6333	42.7666	Rhodanese-like domain-containing protein 4, chloroplastic (Precursor) GN=F2N1.31 OS=Arabidopsis thaliana (Mouse-ear cress) PE=1 SV=2	hypothetical protein JCGZ_14277 [Jatropha curcas]
	VF22390	2742	6.23091	14.7551	13.6283	8.79855	11.8215	17.5266	#N/A	#N/A
	VF26810	2741	27.3132	33.5581	35.5833	35.3005	37.4287	36.8167	ATP-dependent zinc metalloprotease FTSH 10, mitochondrial (Precursor) GN=FTSH10 OS=Arabidopsis thaliana (Mouse-ear cress) PE=1 SV=1	hypothetical protein JCGZ_02970 [Jatropha curcas]
	VF17507	2739	8.77383	5.89391	4.05707	5.24713	4.50145	4.64399	Peptidyl-prolyl cis-trans isomerase CYP59 GN=CYP59 OS=Arabidopsis thaliana (Mouse-ear cress) PE=1 SV=1	Peptidyl-prolyl cis-trans isomerase-like 4 [Morus notabilis]
	VFNG3239	2739	6.85117	0.884521	1.21961	2.57852	2.42938e-10	1.53488	--	conserved hypothetical protein [Ricinus communis]
	VF27804	2738	38.9712	25.3977	26.9582	23.7545	21.0585	18.1146	--	hypothetical protein JCGZ_04848 [Jatropha curcas]
	VF02660	2736	69.2393	116.484	124.914	99.891	124.075	113.201	--	PREDICTED: DNA-binding protein DDB_G0278111 [Vitis vinifera]
	VF04297	2736	44.633	19.6442	24.4294	37.4203	25.3848	21.1155	CDPK-related kinase 1 GN=T3K9.9 OS=Arabidopsis thaliana (Mouse-ear cress) PE=1 SV=1	hypothetical protein JCGZ_20019 [Jatropha curcas]
	VFNG6111	2736	8.24676	1.19828	1.16537	5.33522	1.95604	2.13405	--	PREDICTED: uncharacterized protein LOC104887816 [Beta vulgaris subsp. vulgaris]
	VF05164	2735	68.7269	121.908	152.413	114.895	115.458	139.047	--	hypothetical protein JCGZ_11501 [Jatropha curcas]
	VF18373	2735	27.0538	22.7877	22.4066	22.7685	19.7042	18.5818	--	hypothetical protein POPTR_0001s20900g [Populus trichocarpa]
	VF25005	2735	26.1461	17.5683	16.1295	24.1565	18.9594	13.8591	Transcription factor GTE10 GN=K9H21.2/K9H21.3 OS=Arabidopsis thaliana (Mouse-ear cress) PE=1 SV=2	hypothetical protein JCGZ_11333 [Jatropha curcas]
	VF00957	2734	23.087	12.6755	14.2063	14.8279	13.3793	14.1275	Lysine--tRNA ligase GN=OSJNBa0010D22.26 OS=Oryza sativa subsp. japonica (Rice) PE=2 SV=1	hypothetical protein JCGZ_16183 [Jatropha curcas]
	VF06428	2734	3.87398	2.35444	1.95424	2.65866	1.36419	0.267921	Protein NRT1/ PTR FAMILY 4.3 GN=F23H11.6 OS=Arabidopsis thaliana (Mouse-ear cress) PE=2 SV=1	nitrate transporter, putative [Ricinus communis]
	VF14780	2733	47.1684	33.7701	36.0698	43.2173	32.6178	32.9492	--	hypothetical protein JCGZ_25800 [Jatropha curcas]
	VF15406	2733	19.9319	13.5076	15.397	15.4306	12.5712	9.21082	--	conserved hypothetical protein [Ricinus communis]
	VF26171	2733	177.334	222.403	246.029	217.276	268.461	288.681	Probable ATP synthase 24 kDa subunit, mitochondrial (Precursor) GN=At2g21870 OS=Arabidopsis thaliana (Mouse-ear cress) PE=1 SV=1	PREDICTED: probable ATP synthase 24 kDa subunit, mitochondrial [Vitis vinifera]
	VF27117	2733	19.6545	9.7045	8.90924	15.57	11.9622	10.3488	--	PREDICTED: uncharacterized LOC101217840, partial [Cucumis sativus]
	VF12836	2732	70.7679	49.8679	46.1906	44.0787	50.0085	34.6314	--	hypothetical protein JCGZ_12079 [Jatropha curcas]
	VF12814	2731	26.4482	17.8854	17.5422	22.5826	17.6393	18.9037	--	PREDICTED: uncharacterized protein LOC105042386 [Elaeis guineensis]
	VF14668	2731	41.1704	34.1105	34.9715	39.3435	32.3094	31.3291	--	hypothetical protein JCGZ_27144 [Jatropha curcas]
	VF21027	2731	160.036	292.973	373.876	247.247	291.026	330.957	L-ascorbate oxidase (Precursor) GN=AAO OS=Nicotiana tabacum (Common tobacco) PE=2 SV=1	hypothetical protein JCGZ_22600 [Jatropha curcas]
	VF25973	2731	39.1699	21.9747	20.2445	25.9333	25.8415	23.4406	#N/A	#N/A
	VFNG4114	2731	5.06356	0.0610803	0	2.76477	1.75707	0.457188	Apocytochrome f {ECO:0000255|HAMAP-Rule:MF_00610} (Precursor) OS=Phalaenopsis aphrodite subsp. formosana (Moth orchid) PE=3 SV=1	cytochrome f (chloroplast) [Trifolium glanduliferum]
	VFNG6071	2730	81.2374	59.7871	45.7831	51.1031	39.3606	30.1125	Phytosulfokine-beta (Precursor) GN=T32N15.2 OS=Arabidopsis thaliana (Mouse-ear cress) PE=2 SV=2	hypothetical protein JCGZ_11257 [Jatropha curcas]
	VF21129	2729	35.8828	26.6627	25.4296	25.4375	21.3557	16.8005	NAC domain-containing protein 8 GN=NAC008 OS=Arabidopsis thaliana (Mouse-ear cress) PE=2 SV=1	NAC transcription factor 092 [Jatropha curcas]
	VF25289	2729	70.033	48.5505	56.6455	52.6723	49.9259	39.5888	--	hypothetical protein JCGZ_11848 [Jatropha curcas]
	VF21749	2728	15.6812	27.0257	26.0349	24.038	22.8874	33.9574	--	hypothetical protein JCGZ_10524 [Jatropha curcas]
	VF16086	2727	17.1808	11.4998	8.083	9.46702	6.45854	7.00784	--	Rubredoxin, putative [Ricinus communis]
	VF17295	2727	12.568	7.46855	8.72654	7.5281	6.27388	5.60136	Pentatricopeptide repeat-containing protein At2g17670 GN=At2g17670 OS=Arabidopsis thaliana (Mouse-ear cress) PE=2 SV=1	Tetratricopeptide repeat (TPR)-like superfamily protein [Theobroma cacao]
	VF26062	2727	23.9899	16.3296	18.2925	18.8901	17.3776	17.8483	Phytochromobilin:ferredoxin oxidoreductase, chloroplastic (Precursor) GN=HY2 OS=Arabidopsis thaliana (Mouse-ear cress) PE=2 SV=1	hypothetical protein JCGZ_27129 [Jatropha curcas]
	VF06273	2725	114.961	211.377	209.923	143.267	187.537	210.589	#N/A	#N/A
	VF24985	2725	37.0451	16.9705	18.8885	17.7911	18.3457	16.8394	Acyl-CoA-binding domain-containing protein 4 GN=ACBP4 OS=Arabidopsis thaliana (Mouse-ear cress) PE=1 SV=1	hypothetical protein JCGZ_11355 [Jatropha curcas]
	VF27027	2725	39.4165	18.609	16.5624	32.7333	23.8323	17.4811	--	hypothetical protein JCGZ_26101 [Jatropha curcas]
	VF17032	2724	66.3217	44.2066	40.8351	54.0282	48.6456	46.4576	PP2A regulatory subunit TAP46 GN=TAP46 OS=Arabidopsis thaliana (Mouse-ear cress) PE=1 SV=2	hypothetical protein JCGZ_16178 [Jatropha curcas]
	VFNG918	2724	3.8823	1.49795	1.27473	3.0833	1.24986	1.46383	--	unnamed protein product [Daucus carota]
	VF11225	2722	15.1454	20.7062	28.2173	22.5627	24.3743	27.6431	Metacaspase-1 GN=T7I23.17 OS=Arabidopsis thaliana (Mouse-ear cress) PE=1 SV=1	hypothetical protein JCGZ_14664 [Jatropha curcas]
	VF22990	2722	24.9971	12.5799	10.0616	17.2904	12.2467	13.8447	Xyloglucan glycosyltransferase 4 GN=CSLC4 OS=Arabidopsis thaliana (Mouse-ear cress) PE=1 SV=1	hypothetical protein JCGZ_09647 [Jatropha curcas]
	VF25318	2722	21.2724	32.7237	29.0306	24.8009	31.3124	32.4223	--	conserved hypothetical protein [Ricinus communis]
	VF09927	2721	7.2813	2.39448	2.07752	5.81861	1.32622	1.71024	GEM-like protein 5 GN=At5g13200 OS=Arabidopsis thaliana (Mouse-ear cress) PE=1 SV=1	hypothetical protein JCGZ_23117 [Jatropha curcas]
	VF11916	2721	28.2019	15.1844	19.6433	23.675	18.9647	16.3	UDP-galactose transporter 1 GN=UDP-GALT1 OS=Arabidopsis thaliana (Mouse-ear cress) PE=2 SV=1	hypothetical protein JCGZ_07154 [Jatropha curcas]
	VF16605	2721	36.7616	26.8631	27.175	34.4185	29.7102	24.8779	Ubiquitin carboxyl-terminal hydrolase 25 GN=UBP25 OS=Arabidopsis thaliana (Mouse-ear cress) PE=2 SV=1	hypothetical protein JCGZ_16692 [Jatropha curcas]
	VF19823	2721	3.87918	1.52903	1.6381	1.63891	1.26709	1.528	Pentatricopeptide repeat-containing protein At2g40720 GN=PCMP-E26 OS=Arabidopsis thaliana (Mouse-ear cress) PE=3 SV=1	PREDICTED: pentatricopeptide repeat-containing protein At2g40720 [Populus euphratica]
	VF24312	2721	8.81788	6.78892	6.85819	8.0449	7.6344	6.13825	--	late embryogenesis abundant, putative [Ricinus communis]
	VF08199	2720	48.1967	27.1208	28.6444	38.383	30.897	31.296	Calcium-transporting ATPase 3, endoplasmic reticulum-type OS=Arabidopsis thaliana (Mouse-ear cress) PE=2 SV=3	cation-transporting atpase, putative [Ricinus communis]
	VF12188	2720	211.273	142.957	81.3363	168.284	83.2792	76.712	--	hypothetical protein JCGZ_00229 [Jatropha curcas]
	VF12487	2720	17.2869	13.3353	12.355	11.9416	11.8523	11.3284	--	hypothetical protein JCGZ_03634 [Jatropha curcas]
	VF19338	2720	32.6199	7.51656	9.10835	21.7388	8.3701	11.5553	--	PREDICTED: armadillo repeat-containing protein 7 [Populus euphratica]
	VFNG4377	2720	5.44555	4.31115	3.80945	4.44923	3.38412	2.56242	Uncharacterized mitochondrial protein AtMg00310 GN=AtMg00310 OS=Arabidopsis thaliana (Mouse-ear cress) PE=4 SV=1	hypothetical protein PRUPE_ppa022115mg [Prunus persica]
	VF21615	2719	9.8461	5.49237	7.23649	7.31478	4.50893	4.47619	Pentatricopeptide repeat-containing protein At2g01860 GN=EMB975 OS=Arabidopsis thaliana (Mouse-ear cress) PE=2 SV=1	hypothetical protein JCGZ_08073 [Jatropha curcas]
	VF27618	2719	253.473	500.255	522.234	504.294	496.451	511.609	60S ribosomal protein L27a-3 OS=Arabidopsis thaliana (Mouse-ear cress) PE=2 SV=2	60S ribosomal protein L27A [Vernicia fordii]
	VF00641	2718	5.9696	0.513809	1.46133	2.79479	2.36211e-06	1.31172	--	hypothetical protein JCGZ_19258 [Jatropha curcas]
	VF05123	2718	157.743	178.425	182.977	177.466	175.635	179.498	Phosphoenolpyruvate/phosphate translocator 1, chloroplastic (Precursor) GN=F19N2.40 OS=Arabidopsis thaliana (Mouse-ear cress) PE=1 SV=1	hypothetical protein JCGZ_11463 [Jatropha curcas]
	VF20421	2717	24.1556	18.3026	19.682	19.5784	18.1414	19.0032	--	conserved hypothetical protein [Ricinus communis]
	VFNG2548	2717	49.7703	84.2808	74.0417	66.4335	78.4543	77.0121	ATP-dependent Clp protease proteolytic subunit 4, chloroplastic (Precursor) GN=MFC19.5 OS=Arabidopsis thaliana (Mouse-ear cress) PE=1 SV=1	hypothetical protein JCGZ_02774 [Jatropha curcas]
	VF09496	2716	25.2709	19.7849	12.3985	17.607	16.2075	12.53	PsbP-like protein 1, chloroplastic (Precursor) GN=PPL1 OS=Arabidopsis thaliana (Mouse-ear cress) PE=1 SV=1	hypothetical protein JCGZ_08401 [Jatropha curcas]
	VF16453	2715	46.8497	53.834	57.5895	52.9919	61.4712	59.1464	DNA topoisomerase 3-alpha GN=TOP3A OS=Arabidopsis thaliana (Mouse-ear cress) PE=1 SV=1	hypothetical protein JCGZ_06976 [Jatropha curcas]
	VF17784	2714	12.391	7.21071	4.0472	8.2126	4.83063	5.97584	NAC domain-containing protein 78 GN=T32M21.10 OS=Arabidopsis thaliana (Mouse-ear cress) PE=2 SV=2	conserved hypothetical protein [Ricinus communis]
	VF03554	2713	12.3338	10.1129	10.3838	11.8086	10.774	9.7628	--	hypothetical protein JCGZ_24803 [Jatropha curcas]
	VF04804	2713	3.36613	0.428577	0.165462	2.33054	0.875251	0.584183	#N/A	#N/A
	VF07912	2713	3.7394	0.900303	0.439226	2.72694	1.7128	0.604205	Putative receptor protein kinase ZmPK1 (Precursor) GN=PK1 OS=Zea mays (Maize) PE=2 SV=2	serine-threonine protein kinase, plant-type, putative [Ricinus communis]
	VF20236	2713	5.17772	2.43176	3.64874	3.8353	2.92963	2.78873	Pentatricopeptide repeat-containing protein At2g01740 GN=At2g01740 OS=Arabidopsis thaliana (Mouse-ear cress) PE=3 SV=1	hypothetical protein JCGZ_22870 [Jatropha curcas]
	VF27874	2713	16.1861	7.44215	2.03254	11.9853	4.59544	4.1894	--	conserved hypothetical protein [Ricinus communis]
	VF28013	2713	0.605409	2.40285	2.52095	1.60732	1.96071	2.13613	Multiprotein-bridging factor 1c GN=MBF1C OS=Arabidopsis thaliana (Mouse-ear cress) PE=1 SV=1	hypothetical protein JCGZ_07222 [Jatropha curcas]
	VF10704	2712	18.8926	28.1702	29.3719	21.4188	25.5528	30.9391	Actin-related protein 2 GN=MOJ10.7 OS=Arabidopsis thaliana (Mouse-ear cress) PE=1 SV=1	hypothetical protein JCGZ_26816 [Jatropha curcas]
	VF11574	2712	5.29556	19.8246	20.9957	10.1278	14.492	23.5741	Indole-3-acetic acid-induced protein ARG7 GN=ARG7 OS=Vigna radiata var. radiata (Mung bean) PE=2 SV=1	auxin-responsive family protein [Populus trichocarpa]
	VF19136	2712	8.43048	6.56524	5.83991	6.70129	5.73686	3.76611	--	hypothetical protein JCGZ_05026 [Jatropha curcas]
	VF06094	2711	1.67361	5.8805	5.81846	6.90176	6.26417	7.63905	#N/A	#N/A
	VF01817	2710	120.644	73.3367	79.8692	80.1222	62.7616	74.3639	Long chain base biosynthesis protein 1 OS=Arabidopsis thaliana (Mouse-ear cress) PE=1 SV=1	serine palmitoyltransferase I, putative [Ricinus communis]
	VF03060	2710	47.9559	39.4949	41.896	43.0958	43.0392	40.5326	Cell division control protein 48 homolog C GN=F4P13.15 OS=Arabidopsis thaliana (Mouse-ear cress) PE=2 SV=2	Protein cdcH, putative [Ricinus communis]
	VF14130	2709	33.5025	23.6279	24.0262	23.8285	25.2154	23.1041	--	hypothetical protein JCGZ_16455 [Jatropha curcas]
	VF06803	2708	207.974	239.466	253.064	235.391	254.555	287.774	Calnexin homolog (Precursor) OS=Glycine max (Soybean) PE=2 SV=1	calnexin, putative [Ricinus communis]
	VF13721	2708	5.42997	4.10033	4.03933	4.97713	4.59318	3.55378	--	hypothetical protein JCGZ_25468 [Jatropha curcas]
	VF26432	2708	2.05597	1.30026	1.2232	1.12329	0.909082	0.928153	Putative pentatricopeptide repeat-containing protein At1g68930 GN=PCMP-H22 OS=Arabidopsis thaliana (Mouse-ear cress) PE=3 SV=1	pentatricopeptide repeat-containing protein, putative [Ricinus communis]
	VF02078	2707	4.61515	11.6918	13.0178	13.7474	12.5948	14.4446	--	hypothetical protein JCGZ_20994 [Jatropha curcas]
	VF06742	2707	20.3921	12.5603	14.0862	17.443	12.5075	13.5034	--	hypothetical protein JCGZ_05032 [Jatropha curcas]
	VF27849	2707	39.2487	33.061	32.9315	32.4544	32.6911	27.3465	Serine/threonine-protein kinase HT1 GN=HT1 OS=Arabidopsis thaliana (Mouse-ear cress) PE=1 SV=1	PREDICTED: serine/threonine-protein kinase HT1-like [Citrus sinensis]
	VF03309	2706	14.1535	25.7545	21.8955	23.2694	21.6216	29.8699	4-diphosphocytidyl-2-C-methyl-D-erythritol kinase, chloroplastic/chromoplastic (Precursor; Fragment) GN=ISPE OS=Solanum lycopersicum (Tomato) PE=1 SV=1	hypothetical protein JCGZ_11087 [Jatropha curcas]
	VF08170	2706	20.6345	40.5951	44.5604	35.2075	37.5915	38.7937	Protein Mut11 GN=Mut11 OS=Chlamydomonas reinhardtii (Chlamydomonas smithii) PE=2 SV=1	hypothetical protein JCGZ_09723 [Jatropha curcas]
	VF23643	2706	5.65854	2.84356	2.65689	4.41539	3.17506	3.2275	Pentatricopeptide repeat-containing protein At2g29760, chloroplastic (Precursor) GN=PCMP-H33 OS=Arabidopsis thaliana (Mouse-ear cress) PE=2 SV=1	pentatricopeptide repeat-containing protein, putative [Ricinus communis]
	VF12120	2705	14.4996	9.82026	10.3576	11.4863	12.0185	9.82717	--	hypothetical protein JCGZ_09199 [Jatropha curcas]
	VF12725	2705	26.9394	12.8545	10.5463	19.3224	14.6756	14.5914	Phosphoinositide phosphatase SAC2 GN=SAC2 OS=Arabidopsis thaliana (Mouse-ear cress) PE=2 SV=1	hypothetical protein JCGZ_24650 [Jatropha curcas]
	VF17196	2705	11.8367	56.9358	36.1609	37.4648	60.2464	59.4774	CDGSH iron-sulfur domain-containing protein NEET GN=NEET OS=Arabidopsis thaliana (Mouse-ear cress) PE=1 SV=1	hypothetical protein JCGZ_26204 [Jatropha curcas]
	VF26948	2705	2.02485	1.1837	1.07437	1.62381	1.13896	1.27642	Putative pentatricopeptide repeat-containing protein At3g15930 GN=PCMP-E51 OS=Arabidopsis thaliana (Mouse-ear cress) PE=3 SV=2	hypothetical protein JCGZ_26170 [Jatropha curcas]
	VF21296	2704	37.0093	20.1883	21.4549	23.5186	23.0101	22.7293	--	hypothetical protein JCGZ_02025 [Jatropha curcas]
	VF21675	2704	24.0934	19.467	20.751	19.607	20.4464	18.4329	Proton pump-interactor 1 GN=PPI1 OS=Arabidopsis thaliana (Mouse-ear cress) PE=1 SV=2	conserved hypothetical protein [Ricinus communis]
	VF27834	2703	45.1487	33.6606	37.9178	37.4112	35.8391	35.4427	COP9 signalosome complex subunit 2 GN=T20P8.4 OS=Arabidopsis thaliana (Mouse-ear cress) PE=1 SV=1	cop9 signalosome complex subunit, putative [Ricinus communis]
	VF00730	2702	59.0737	45.1685	45.3582	55.9033	48.1538	44.169	--	hypothetical protein JCGZ_12385 [Jatropha curcas]
	VF04079	2702	4.15005	8.42972	9.87864	6.09075	7.05579	10.4366	L-type lectin-domain containing receptor kinase V.9 (Precursor) GN=LECRK59 OS=Arabidopsis thaliana (Mouse-ear cress) PE=2 SV=1	serine-threonine protein kinase, plant-type, putative [Ricinus communis]
	VF06692	2702	102.671	67.8073	76.9732	80.2633	83.0968	70.5378	UDP-glucose:glycoprotein glucosyltransferase (Precursor) OS=Arabidopsis thaliana (Mouse-ear cress) PE=1 SV=1	hypothetical protein JCGZ_05000 [Jatropha curcas]
	VF05121	2702	8.92859	14.8407	15.9784	14.9919	15.9582	15.2057	--	hypothetical protein JCGZ_11461 [Jatropha curcas]
	VF02542	2701	74.5698	48.3888	33.1831	51.9899	43.8387	44.2545	--	hypothetical protein JCGZ_24567 [Jatropha curcas]
	VF06050	2701	20.7892	11.9581	13.224	17.1713	12.7031	13.6067	Dol-P-Man:Man(6)GlcNAc(2)-PP-Dol alpha-1,2-mannosyltransferase GN=ALG9 OS=Arabidopsis thaliana (Mouse-ear cress) PE=1 SV=1	hypothetical protein JCGZ_10574 [Jatropha curcas]
	VF15575	2701	61.2767	108.941	122.381	76.0721	105.519	116.674	--	hypothetical protein JCGZ_07415 [Jatropha curcas]
	VF07132	2700	117.814	94.0729	79.5276	109.493	82.2628	77.9424	50S ribosomal protein L13, chloroplastic (Precursor) GN=T30F21.4 OS=Arabidopsis thaliana (Mouse-ear cress) PE=2 SV=1	hypothetical protein JCGZ_03565 [Jatropha curcas]
	VF20006	2700	84.4913	69.0596	70.1917	81.2948	72.6979	63.2345	Histidine--tRNA ligase OS=Oryza sativa subsp. japonica (Rice) PE=2 SV=2	hypothetical protein JCGZ_17211 [Jatropha curcas]
	VF26698	2700	72.6226	27.0514	23.3125	50.3662	42.1381	30.5378	--	hypothetical protein JCGZ_12096 [Jatropha curcas]
	VF26297	2699	137.079	53.1959	68.9098	64.7387	49.3726	59.0897	--	hypothetical protein JCGZ_11688 [Jatropha curcas]
	VF02438	2698	39.6403	44.9467	50.5519	44.4492	49.5709	54.5783	Cytosolic Fe-S cluster assembly factor NBP35 {ECO:0000255|HAMAP-Rule:MF_03038} GN=At5g50960 OS=Arabidopsis thaliana (Mouse-ear cress) PE=1 SV=1	hypothetical protein JCGZ_10179 [Jatropha curcas]
	VF04319	2698	31.8661	22.896	21.8743	28.7464	26.213	21.231	--	translin associated factor X, putative [Ricinus communis]
	VF17254	2698	10.4995	0.000122387	4.30901e-08	3.0873	0.049647	1.89271	--	hypothetical protein JCGZ_26255 [Jatropha curcas]
	VF26985	2698	40.127	32.1886	30.0969	38.1816	28.6685	25.3422	E3 ubiquitin-protein ligase XBAT33 GN=XBAT33 OS=Arabidopsis thaliana (Mouse-ear cress) PE=2 SV=1	hypothetical protein JCGZ_26140 [Jatropha curcas]
	VF06790	2697	104.749	73.0711	50.4455	64.5718	71.9448	54.8572	--	JHL07K02.5 [Jatropha curcas]
	VF19378	2697	7.52982	4.33218	2.85241	2.64198	2.83514	1.41276	Probable LRR receptor-like serine/threonine-protein kinase At2g24230 (Precursor) GN=At2g24230 OS=Arabidopsis thaliana (Mouse-ear cress) PE=2 SV=1	hypothetical protein JCGZ_04026 [Jatropha curcas]
	VF21672	2697	33.9413	96.4467	72.4448	83.4182	108.261	114.214	Calvin cycle protein CP12-3, chloroplastic (Precursor) GN=CP12-3 OS=Arabidopsis thaliana (Mouse-ear cress) PE=1 SV=1	hypothetical protein JCGZ_08018 [Jatropha curcas]
	VF26182	2697	37.7488	24.4322	26.2511	28.3617	29.7759	25.7575	--	hypothetical protein JCGZ_15594 [Jatropha curcas]
	VF27048	2697	30.8191	23.3548	24.588	25.0485	20.721	16.7919	--	hypothetical protein JCGZ_26083 [Jatropha curcas]
	VFNG6190	2696	20.9265	50.2736	46.2156	35.9854	45.6304	43.3621	Uncharacterized protein At2g17340 GN=At2g17340 OS=Arabidopsis thaliana (Mouse-ear cress) PE=1 SV=1	hypothetical protein JCGZ_10747 [Jatropha curcas]
	VF26018	2695	17.8012	9.53335	7.46592	10.7331	12.7172	7.78314	--	conserved hypothetical protein [Ricinus communis]
	VF13354	2694	48.2723	26.5195	26.1901	35.5344	36.0423	26.7381	mRNA cap guanine-N7 methyltransferase 1 GN=At3g20650 OS=Arabidopsis thaliana (Mouse-ear cress) PE=2 SV=1	mRNA (guanine-7-)methyltransferase, putative [Ricinus communis]
	VF18087	2694	12.2732	6.75327	6.62663	10.6905	5.98441	6.48809	#N/A	#N/A
	VF09716	2693	6.58144	4.84797	4.59838	4.28386	4.06518	3.89698	--	hypothetical protein JCGZ_09926 [Jatropha curcas]
	VF14076	2693	15.144	12.2376	12.1055	12.5523	11.4248	8.85266	Pentatricopeptide repeat-containing protein At2g37230 GN=At2g37230 OS=Arabidopsis thaliana (Mouse-ear cress) PE=2 SV=1	hypothetical protein JCGZ_16511 [Jatropha curcas]
	VF16107	2693	20.0466	23.0993	24.4529	21.9512	24.2126	23.4541	--	tRNA pseudouridine synthase d, putative [Ricinus communis]
	VF17847	2693	33.0645	56.7477	60.3578	39.3044	52.3379	59.8059	Probable thylakoidal processing peptidase 2, chloroplastic (Precursor) GN=TPP2 OS=Arabidopsis thaliana (Mouse-ear cress) PE=2 SV=1	hypothetical protein JCGZ_04335 [Jatropha curcas]
	VF20289	2693	39.126	64.4524	82.0433	69.0875	95.3154	88.8529	Anthranilate synthase beta subunit 1, chloroplastic (Precursor) GN=F4F7.39 OS=Arabidopsis thaliana (Mouse-ear cress) PE=1 SV=1	hypothetical protein JCGZ_04812 [Jatropha curcas]
	VF21330	2693	27.7419	17.0027	18.3328	25.1215	20.4602	16.0057	--	hypothetical protein JCGZ_02063 [Jatropha curcas]
	VF05912	2692	4.48989	2.79536	3.53246	3.2494	2.68179	2.21422	Pentatricopeptide repeat-containing protein At3g26782, mitochondrial (Precursor) GN=PCMP-H34 OS=Arabidopsis thaliana (Mouse-ear cress) PE=2 SV=1	hypothetical protein JCGZ_26860 [Jatropha curcas]
	VF06842	2692	16.8818	4.91382	6.85367	10.811	7.204	7.80249	LRR receptor-like serine/threonine-protein kinase GSO2 (Precursor) GN=K23L20.3 OS=Arabidopsis thaliana (Mouse-ear cress) PE=2 SV=2	PREDICTED: probable LRR receptor-like serine/threonine-protein kinase At3g47570 [Populus euphratica]
	VF12664	2692	50.9057	77.7778	79.0046	62.0632	79.0698	74.6048	ABC transporter F family member 1 GN=MAE1.10 OS=Arabidopsis thaliana (Mouse-ear cress) PE=1 SV=1	hypothetical protein JCGZ_05457 [Jatropha curcas]
	VF13934	2692	15.3736	17.4321	17.3382	16.8231	18.4459	19.5977	Serine/threonine-protein kinase AFC2 GN=AFC2 OS=Arabidopsis thaliana (Mouse-ear cress) PE=1 SV=1	hypothetical protein JCGZ_16623 [Jatropha curcas]
	VF24747	2692	43.6106	87.6859	97.5386	55.744	77.9866	112.371	Putative 4-hydroxy-4-methyl-2-oxoglutarate aldolase 2 GN=At5g16450 OS=Arabidopsis thaliana (Mouse-ear cress) PE=1 SV=1	PREDICTED: putative 4-hydroxy-4-methyl-2-oxoglutarate aldolase 2 [Populus euphratica]
	VF24459	2692	48.7525	30.2612	25.139	29.812	28.4926	29.1175	Protein TIFY 4B OS=Arabidopsis thaliana (Mouse-ear cress) PE=1 SV=1	conserved hypothetical protein [Ricinus communis]
	VF14037	2691	29.1563	24.6677	23.749	25.4341	26.5271	22.13	Histidine--tRNA ligase OS=Oryza sativa subsp. japonica (Rice) PE=2 SV=2	hypothetical protein JCGZ_16551 [Jatropha curcas]
	VF27409	2690	36.627	18.6758	18.1242	28.477	25.6636	19.5976	Alpha-L-fucosidase 2 (Precursor) GN=F10M10.30 OS=Arabidopsis thaliana (Mouse-ear cress) PE=1 SV=1	hypothetical protein JCGZ_16273 [Jatropha curcas]
	VF05362	2689	366.22	348.197	339.69	350.343	350.551	327.958	40S ribosomal protein S15a-1 GN=RPS15AF OS=Arabidopsis thaliana (Mouse-ear cress) PE=2 SV=2	hypothetical protein CICLE_v10033065mg [Citrus clementina]
	VF07609	2689	453.176	139.48	127.303	180.772	156.668	172.722	--	conserved hypothetical protein [Ricinus communis]
	VF09826	2689	26.9461	14.2578	17.5693	19.6951	8.4596	8.47167	--	hypothetical protein JCGZ_11163 [Jatropha curcas]
	VF14794	2689	7.61917	11.773	12.6941	8.60091	11.0325	13.9606	Probable polyol transporter 4 GN=PLT4 OS=Arabidopsis thaliana (Mouse-ear cress) PE=2 SV=1	hypothetical protein JCGZ_25810 [Jatropha curcas]
	VF06406	2688	2.72008	1.00137	1.10561	1.96717	0.525805	0.997155	Pentatricopeptide repeat-containing protein At3g22690 GN=PCMP-H56 OS=Arabidopsis thaliana (Mouse-ear cress) PE=2 SV=1	pentatricopeptide repeat-containing protein, putative [Ricinus communis]
	VFNG5921	2688	26.2589	19.6245	10.413	19.6193	13.4665	10.6821	#N/A	#N/A
	VF04088	2687	75.8617	60.3197	65.579	71.0577	64.6677	55.9533	--	hypothetical protein JCGZ_26591 [Jatropha curcas]
	VF17576	2687	29.3134	8.99542	10.8242	23.6724	10.6038	10.5084	--	hypothetical protein JCGZ_14003 [Jatropha curcas]
	VF28224	2687	5.36535	3.29208	2.14984	3.99043	3.2704	3.00194	--	conserved hypothetical protein [Ricinus communis]
	VF13032	2685	30.5604	7.13924	7.19622	23.7859	10.0662	8.78649	--	conserved hypothetical protein [Ricinus communis]
	VF17639	2685	62.2865	39.081	33.161	54.111	45.9073	33.3927	--	hypothetical protein JCGZ_13944 [Jatropha curcas]
	VF18057	2685	18.6026	29.1716	30.1619	30.725	26.4284	35.2145	Sulfiredoxin, chloroplastic/mitochondrial (Precursor) GN=SRX OS=Arabidopsis thaliana (Mouse-ear cress) PE=1 SV=1	Sulfiredoxin-1, putative [Ricinus communis]
	VF18138	2685	37.633	43.5704	44.7733	40.5391	47.2223	50.834	E3 ubiquitin-protein ligase RKP GN=F7D8.33 OS=Arabidopsis thaliana (Mouse-ear cress) PE=2 SV=2	hypothetical protein JCGZ_02453 [Jatropha curcas]
	VF22166	2685	15.5106	8.15168	10.9999	10.0437	8.17353	4.36049	--	hypothetical protein JCGZ_08542 [Jatropha curcas]
	VF22279	2685	51.3743	41.4622	35.3787	44.8678	34.2454	37.1103	--	hypothetical protein JCGZ_15251 [Jatropha curcas]
	VFNG1269	2684	5.60469	1.52788	1.56132	4.51338	2.30081	1.64664	--	hypothetical protein PRUPE_ppa021910mg, partial [Prunus persica]
	VF06263	2683	649.36	487.961	535.047	494.583	475.985	408.649	60S ribosomal protein L36-2 GN=RPL36B OS=Arabidopsis thaliana (Mouse-ear cress) PE=2 SV=1	hypothetical protein JCGZ_14405 [Jatropha curcas]
	VF07512	2683	30.0751	11.7291	11.4863	13.8192	13.7298	13.4559	#N/A	#N/A
	VF17050	2683	28.2633	38.2822	39.6522	35.8481	41.4605	51.1929	E3 ubiquitin-protein ligase SDIR1 GN=SDIR1 OS=Arabidopsis thaliana (Mouse-ear cress) PE=1 SV=1	hypothetical protein JCGZ_01431 [Jatropha curcas]
	VF21013	2683	3.52787	2.43272	2.5549	2.92253	2.22742	2.5539	--	hypothetical protein JCGZ_09050 [Jatropha curcas]
	VFNG425	2683	15.6257	6.84821	6.89827	13.6971	6.83473	6.20358	Sm-like protein LSM8 {ECO:0000305} OS=Arabidopsis thaliana (Mouse-ear cress) PE=1 SV=1	hypothetical protein JCGZ_10863 [Jatropha curcas]
	VF03408	2682	4.73515	6.03258	7.53371	6.52728	7.19327	8.49631	--	hypothetical protein JCGZ_06440 [Jatropha curcas]
	VF06789	2682	25.4998	35.5836	34.7553	28.4378	33.6807	34.5299	Probable beta-1,4-xylosyltransferase IRX10L GN=MAC9.17 OS=Arabidopsis thaliana (Mouse-ear cress) PE=2 SV=1	JHL07K02.4 [Jatropha curcas]
	VF28256	2682	31.2135	15.632	15.325	18.9829	15.361	18.0533	--	hypothetical protein JCGZ_11230 [Jatropha curcas]
	VF08622	2681	16.1447	11.4618	11.4929	14.7843	9.31999	8.3231	Zinc finger CCCH domain-containing protein 39 GN=At3g19360 OS=Arabidopsis thaliana (Mouse-ear cress) PE=2 SV=1	hypothetical protein JCGZ_06177 [Jatropha curcas]
	VF27780	2681	53.6688	35.798	39.8885	48.6252	39.412	37.8164	--	hypothetical protein JCGZ_22470 [Jatropha curcas]
	VF22937	2680	48.5578	41.1747	40.5559	40.2931	41.893	39.799	--	hypothetical protein JCGZ_13358 [Jatropha curcas]
	VF23749	2680	119.218	75.9755	70.9982	109.937	84.3275	68.0593	Eukaryotic translation initiation factor 6-2 {ECO:0000255|HAMAP-Rule:MF_03132} GN=At3g55620 OS=Arabidopsis thaliana (Mouse-ear cress) PE=2 SV=1	translation initiation factor, putative [Ricinus communis]
	VF23968	2680	583.368	768.3	965.485	756.668	817.558	1022.36	Triosephosphate isomerase, cytosolic GN=TPIP1 OS=Petunia hybrida (Petunia) PE=2 SV=1	hypothetical protein JCGZ_11042 [Jatropha curcas]
	VF01199	2679	89.3008	75.3169	65.1399	75.2991	69.4627	51.7742	--	hypothetical protein POPTR_0011s16880g [Populus trichocarpa]
	VF02972	2679	13.8047	10.4129	10.9283	10.1648	9.74612	8.02958	#N/A	#N/A
	VF22146	2679	45.9151	26.4728	27.8937	29.1103	27.0544	28.7544	Protein CASP GN=CASP OS=Arabidopsis thaliana (Mouse-ear cress) PE=1 SV=2	Protein CASP, putative [Ricinus communis]
	VF11911	2678	282.197	1317.68	1487.44	721.19	1026.24	1299.93	14 kDa proline-rich protein DC2.15 (Precursor) OS=Daucus carota (Wild carrot) PE=2 SV=1	hypothetical protein JCGZ_07147 [Jatropha curcas]
	VF23451	2678	102.019	70.5451	79.0788	69.7666	66.8456	61.9861	--	hypothetical protein POPTR_0009s16200g [Populus trichocarpa]
	VF18768	2677	0.607384	3.24177	3.85072	1.92975	2.85941	3.05088	Protein kinase APK1B, chloroplastic (Precursor) GN=APK1B OS=Arabidopsis thaliana (Mouse-ear cress) PE=2 SV=2	PREDICTED: protein kinase APK1A, chloroplastic-like [Populus euphratica]
	VF16235	2676	20.6134	14.4375	15.6461	18.7393	16.8895	12.8784	Pentatricopeptide repeat-containing protein At5g02860 GN=At5g02860 OS=Arabidopsis thaliana (Mouse-ear cress) PE=2 SV=1	hypothetical protein JCGZ_23587 [Jatropha curcas]
	VF13498	2675	7.36532	16.661	17.7016	17.8534	17.862	18.0767	Mediator-associated protein 3 GN=At5g42060 OS=Arabidopsis thaliana (Mouse-ear cress) PE=1 SV=1	conserved hypothetical protein [Ricinus communis]
	VF27012	2675	14.4538	7.14166	5.01018	5.85138	7.18648	5.35826	#N/A	#N/A
	VF27836	2675	60.559	173.266	185.183	205.404	202.706	216.635	--	hypothetical protein JCGZ_07980 [Jatropha curcas]
	VF13444	2674	39.2611	22.6494	19.9057	25.5375	24.5745	24.3179	Haloacid dehalogenase-like hydrolase domain-containing protein At3g48420 (Precursor) GN=At3g48420 OS=Arabidopsis thaliana (Mouse-ear cress) PE=2 SV=1	hypothetical protein JCGZ_06916 [Jatropha curcas]
	VF13955	2674	132.186	203.682	198.497	188.444	168.591	229.414	Peroxiredoxin-2E, chloroplastic (Precursor) GN=PRXIIE OS=Arabidopsis thaliana (Mouse-ear cress) PE=1 SV=2	hypothetical protein JCGZ_23698 [Jatropha curcas]
	VF15961	2674	6.33197	3.18633	3.70021	3.55859	3.16306	3.42902	Chaperone protein dnaJ 1, mitochondrial (Precursor) GN=ATJ1 OS=Arabidopsis thaliana (Mouse-ear cress) PE=2 SV=2	hypothetical protein JCGZ_23349 [Jatropha curcas]
	VF19072	2674	144.11	92.5063	98.58	107.613	94.2544	102.968	Vacuolar protein sorting-associated protein 29 GN=At3g47810 OS=Arabidopsis thaliana (Mouse-ear cress) PE=2 SV=1	hypothetical protein JCGZ_21682 [Jatropha curcas]
	VF27308	2674	20.4106	11.1025	6.7362	7.1451	10.7785	4.4113	--	hypothetical protein JCGZ_22667 [Jatropha curcas]
	VF23324	2673	17.3813	20.7374	20.1532	18.0621	19.8469	21.6871	Photosystem II stability/assembly factor HCF136, chloroplastic (Precursor) GN=OSJNBa0069C14.15 OS=Oryza sativa subsp. japonica (Rice) PE=3 SV=1	hypothetical protein JCGZ_24237 [Jatropha curcas]
	VF22283	2672	49.1397	40.2164	43.8733	42.2822	42.603	37.3507	--	conserved hypothetical protein [Ricinus communis]
	VF24178	2672	98.5357	145.689	145.491	123.977	146.483	136.535	40S ribosomal protein S10-3 GN=RPS10C OS=Arabidopsis thaliana (Mouse-ear cress) PE=2 SV=2	40S ribosomal protein S10, putative [Ricinus communis]
	VF25742	2672	34.6774	16.9906	17.0044	30.4069	16.3054	16.3791	--	conserved hypothetical protein [Ricinus communis]
	VF11352	2670	11.9481	21.8067	19.7995	14.18	19.0794	22.1006	Golgi SNAP receptor complex member 1-2 GN=GOS12 OS=Arabidopsis thaliana (Mouse-ear cress) PE=1 SV=2	Golgi snare 12 isoform 1 [Theobroma cacao]
	VF26950	2670	10.4136	15.7619	16.051	14.7643	13.2334	18.1513	Sorbitol dehydrogenase GN=SDH OS=Arabidopsis thaliana (Mouse-ear cress) PE=1 SV=1	alcohol dehydrogenase, putative [Ricinus communis]
	VF01314	2669	15.4037	3.09683	3.04476	11.9048	4.98406	4.00286	Uncharacterized protein At3g61260 GN=At3g61260 OS=Arabidopsis thaliana (Mouse-ear cress) PE=1 SV=1	hypothetical protein JCGZ_15681 [Jatropha curcas]
	VF09311	2669	21.9349	12.0339	12.3393	16.5203	12.0344	14.0787	AMSH-like ubiquitin thioesterase 3 GN=AMSH3 OS=Arabidopsis thaliana (Mouse-ear cress) PE=1 SV=2	hypothetical protein JCGZ_18964 [Jatropha curcas]
	VF12068	2669	52.024	30.1589	31.0282	39.1012	35.4079	34.9336	Vacuolar protein sorting-associated protein 20 homolog 1 GN=MGI19.8 OS=Arabidopsis thaliana (Mouse-ear cress) PE=1 SV=1	hypothetical protein JCGZ_22917 [Jatropha curcas]
	VF08020	2667	88.0545	37.9867	38.0982	53.6136	52.0519	46.816	MIP18 family protein At1g68310 GN=At1g68310 OS=Arabidopsis thaliana (Mouse-ear cress) PE=2 SV=2	Protein FAM96B, putative [Ricinus communis]
	VF12114	2667	11.01	8.76169	7.87344	10.2948	9.19342	7.50128	Myb-related protein 3R-1 GN=MYB3R-1 OS=Arabidopsis thaliana (Mouse-ear cress) PE=2 SV=1	hypothetical protein JCGZ_05339 [Jatropha curcas]
	VF17768	2667	41.9994	90.2063	87.1844	65.5458	81.0738	79.1167	Uncharacterized membrane protein At1g75140 GN=At1g75140 OS=Arabidopsis thaliana (Mouse-ear cress) PE=1 SV=3	conserved hypothetical protein [Ricinus communis]
	VF25136	2667	13.2056	6.10763	5.82553	9.56305	5.47019	7.23656	SPX domain-containing protein 4 GN=SPX4 OS=Arabidopsis thaliana (Mouse-ear cress) PE=2 SV=1	xenotropic and polytropic murine leukemia virus receptor ids-4, putative [Ricinus communis]
	VF25243	2667	23.2381	18.9552	18.5679	20.3413	19.4249	14.4186	NAD-dependent protein deacetylase SRT1 GN=SRT1 OS=Arabidopsis thaliana (Mouse-ear cress) PE=2 SV=1	chromatin regulatory protein sir2, putative [Ricinus communis]
	VF14233	2666	18.4548	12.2522	11.4638	16.9799	12.4467	11.7507	SURP and G-patch domain-containing protein 1-like protein GN=At3g52120 OS=Arabidopsis thaliana (Mouse-ear cress) PE=2 SV=1	hypothetical protein JCGZ_24464 [Jatropha curcas]
	VF15695	2666	155.139	333.922	289.648	246.636	358.029	313.084	20 kDa chaperonin, chloroplastic (Precursor) GN=T1M15.120 OS=Arabidopsis thaliana (Mouse-ear cress) PE=1 SV=2	hypothetical protein JCGZ_07519 [Jatropha curcas]
	VF22580	2665	13.1712	5.47516	8.43957	10.0613	8.18241	6.455	--	conserved hypothetical protein [Ricinus communis]
	VF22686	2665	10.555	6.40597	6.99056	6.03675	5.94244	5.67449	#N/A	#N/A
	VF27348	2664	10.2673	5.08046	2.58969	8.2298	4.59294	3.92497	Probable LRR receptor-like serine/threonine-protein kinase At1g56130 (Precursor) GN=At1g56130 OS=Arabidopsis thaliana (Mouse-ear cress) PE=2 SV=2	hypothetical protein JCGZ_22628 [Jatropha curcas]
	VF03158	2663	27.0494	18.8863	12.993	24.2804	16.1349	11.7916	RING-H2 finger protein ATL46 GN=ATL46 OS=Arabidopsis thaliana (Mouse-ear cress) PE=2 SV=1	ring finger protein, putative [Ricinus communis]
	VF13564	2663	214.059	43.1715	64.5953	74.24	51.1313	69.4233	Methionine gamma-lyase GN=MGL OS=Arabidopsis thaliana (Mouse-ear cress) PE=1 SV=1	hypothetical protein JCGZ_20358 [Jatropha curcas]
	VF18385	2663	6.16205	4.5852	4.13969	5.38952	4.44134	4.66406	Probably inactive leucine-rich repeat receptor-like protein kinase At2g25790 (Precursor) GN=At2g25790 OS=Arabidopsis thaliana (Mouse-ear cress) PE=2 SV=1	unnamed protein product [Vitis vinifera]
	VF07632	2662	164.168	47.5948	9.5423	129.115	39.5267	29.105	Probable strigolactone esterase D14 homolog GN=D14 OS=Arabidopsis thaliana (Mouse-ear cress) PE=1 SV=1	hypothetical protein JCGZ_03046 [Jatropha curcas]
	VF11772	2662	17.4876	11.8695	12.4721	15.0016	14.512	12.0139	Cryptochrome DASH, chloroplastic/mitochondrial (Precursor) GN=F6A4.60 OS=Arabidopsis thaliana (Mouse-ear cress) PE=1 SV=2	hypothetical protein JCGZ_07003 [Jatropha curcas]
	VF02346	2661	16.3641	26.5755	35.2608	31.3364	32.2976	43.056	KH domain-containing protein At4g18375 GN=At4g18375 OS=Arabidopsis thaliana (Mouse-ear cress) PE=2 SV=1	hypothetical protein JCGZ_18727 [Jatropha curcas]
	VF10234	2661	73.0816	43.752	41.2334	61.3822	49.3992	47.5303	Fatty-acid-binding protein 2 GN=FAP2 OS=Arabidopsis thaliana (Mouse-ear cress) PE=2 SV=2	hypothetical protein JCGZ_07589 [Jatropha curcas]
	VF21177	2661	4.4769e-06	7.00658	3.84151	4.10671	6.37136	10.0955	Vacuolar protein sorting-associated protein 28 homolog 2 GN=VPS28-2 OS=Arabidopsis thaliana (Mouse-ear cress) PE=1 SV=2	hypothetical protein JCGZ_21366 [Jatropha curcas]
	VF23773	2661	23.112	18.9442	17.716	18.0494	18.162	13.8613	--	hypothetical protein POPTR_0006s20250g [Populus trichocarpa]
	VF02682	2660	37.1716	27.4759	27.6891	24.848	25.6706	23.3587	High mobility group B protein 14 GN=F13P17.25 OS=Arabidopsis thaliana (Mouse-ear cress) PE=2 SV=2	HMG-box DNA-binding family protein isoform 1 [Theobroma cacao]
	VF05070	2660	8.34701	5.5564	6.95994	6.73329	6.27807	5.80781	#N/A	#N/A
	VF12676	2660	7.02515	3.93065	3.43458	3.08112	2.9081	2.86734	Pentatricopeptide repeat-containing protein At2g28050 GN=At2g28050 OS=Arabidopsis thaliana (Mouse-ear cress) PE=3 SV=1	pentatricopeptide repeat-containing protein, putative [Ricinus communis]
	VF12937	2660	66.3038	55.428	39.998	49.1879	47.3016	39.085	30S ribosomal protein S10, chloroplastic (Precursor) GN=RPS10 OS=Mesembryanthemum crystallinum (Common ice plant) PE=2 SV=1	hypothetical protein JCGZ_01016 [Jatropha curcas]
	VF21451	2660	126.247	82.5715	88.1409	113.732	95.9486	86.7316	Auxin response factor 5 GN=F6F9.10 OS=Arabidopsis thaliana (Mouse-ear cress) PE=1 SV=3	hypothetical protein JCGZ_08238 [Jatropha curcas]
	VF04096	2659	38.2517	29.0267	23.0987	32.524	29.3808	26.317	Aminotransferase ALD1 GN=ALD1 OS=Arabidopsis thaliana (Mouse-ear cress) PE=1 SV=2	Aspartate aminotransferase, putative [Ricinus communis]
	VF01792	2658	20.3514	53.4605	72.3316	53.0358	49.243	62.3888	--	hypothetical protein JCGZ_25867 [Jatropha curcas]
	VF13716	2658	14.5735	18.3615	17.5771	15.5092	17.0013	18.8966	--	hypothetical protein JCGZ_06357 [Jatropha curcas]
	VFNG4952	2657	50.1022	17.2969	15.8685	33.4006	18.228	23.8625	--	hypothetical protein JCGZ_17766 [Jatropha curcas]
	VF11909	2657	9.90866	8.03921	7.30716	8.14919	7.07582	7.77936	--	hypothetical protein JCGZ_07144 [Jatropha curcas]
	VF03953	2656	61.2827	32.35	35.5384	46.9641	41.9602	38.618	Heat shock 70 kDa protein 16 GN=HSP70-16 OS=Arabidopsis thaliana (Mouse-ear cress) PE=2 SV=1	hypothetical protein JCGZ_00880 [Jatropha curcas]
	VF04596	2656	56.095	34.464	34.4903	41.6074	40.6456	38.4434	NAC domain-containing protein 78 GN=T32M21.10 OS=Arabidopsis thaliana (Mouse-ear cress) PE=2 SV=2	NAC transcription factor 043 [Jatropha curcas]
	VF05105	2656	33.9952	27.0566	27.4235	31.6997	29.2701	27.7964	--	zinc finger protein, putative [Ricinus communis]
	VF10358	2656	33.6094	8.05244	11.7778	13.5616	10.4909	12.6945	--	conserved hypothetical protein [Ricinus communis]
	VF15839	2656	34.5317	23.8471	10.559	19.755	12.8055	13.8647	Homeobox protein knotted-1-like 1 OS=Oryza sativa subsp. japonica (Rice) PE=2 SV=1	homeobox protein knotted-1, putative [Ricinus communis]
	VF28126	2656	25.1674	13.3773	14.8129	18.2698	16.575	16.2312	--	hypothetical protein JCGZ_08726 [Jatropha curcas]
	VF06111	2656	31.311	15.8974	14.561	14.9342	10.8426	14.1257	--	conserved hypothetical protein [Ricinus communis]
	VF12545	2654	48.6063	21.8721	19.3745	26.8018	27.9546	24.8196	Two-on-two hemoglobin-3 GN=GLB3 OS=Arabidopsis thaliana (Mouse-ear cress) PE=1 SV=1	hypothetical protein JCGZ_07797 [Jatropha curcas]
	VF03305	2653	39.4335	25.4204	24.1624	30.3734	26.4624	28.1638	--	hypothetical protein JCGZ_01506 [Jatropha curcas]
	VF12359	2653	22.9381	14.8263	12.4247	19.4249	15.1592	14.9143	Phosphoglucomutase, chloroplastic (Precursor) GN=PGMP OS=Solanum tuberosum (Potato) PE=2 SV=1	phosphoglucomutase, putative [Ricinus communis]
	VF17853	2653	20.6332	16.5104	16.4766	17.7468	17.9853	13.422	CST complex subunit CTC1 GN=CTC1 OS=Arabidopsis thaliana (Mouse-ear cress) PE=1 SV=2	PREDICTED: CST complex subunit CTC1 isoform X1 [Populus euphratica]
	VF03593	2652	12.0324	6.74169	3.13909	9.40587	6.8467	4.24198	Senescence-induced receptor-like serine/threonine-protein kinase (Precursor) GN=T20K24.21 OS=Arabidopsis thaliana (Mouse-ear cress) PE=2 SV=1	hypothetical protein JCGZ_24831 [Jatropha curcas]
	VF11036	2652	16.4278	10.9332	11.3736	11.2104	11.9275	10.9931	DNA repair endonuclease UVH1 GN=MEE6.22 OS=Arabidopsis thaliana (Mouse-ear cress) PE=1 SV=2	PREDICTED: DNA repair endonuclease UVH1 [Populus euphratica]
	VF20961	2652	37.1317	21.0131	18.134	31.6331	22.2925	21.498	Probable RNA polymerase II transcription factor B subunit 1-1 GN=TFB1-1 OS=Arabidopsis thaliana (Mouse-ear cress) PE=2 SV=1	hypothetical protein JCGZ_13184 [Jatropha curcas]
	VF24037	2652	12.2351	8.39325	8.44026	8.92716	9.46313	5.25666	2-succinyl-6-hydroxy-2,4-cyclohexadiene-1-carboxylate synthase (Precursor) GN=T6L1.7/T6L1.8 OS=Arabidopsis thaliana (Mouse-ear cress) PE=2 SV=2	menaquinone biosynthesis protein, putative [Ricinus communis]
	VF27797	2652	57.6517	34.2017	38.3015	46.1121	39.2255	40.2501	Uncharacterized protein At4g19900 GN=At4g19900 OS=Arabidopsis thaliana (Mouse-ear cress) PE=2 SV=1	hypothetical protein JCGZ_18104 [Jatropha curcas]
	VF16680	2651	3.42804	2.3828	1.57189	2.58316	2.51183	1.6798	Protein phosphatase 2C 37 GN=F24K9.8 OS=Arabidopsis thaliana (Mouse-ear cress) PE=1 SV=1	alpha-2,8-sialyltransferase 8b, putative [Ricinus communis]
	VF23135	2651	15.586	22.9746	24.601	22.026	26.99	23.8263	5&apos;-adenylylsulfate reductase 3, chloroplastic (Precursor) GN=F1N20.90 OS=Arabidopsis thaliana (Mouse-ear cress) PE=2 SV=2	5&apos;-adenylylsulfate reductase 1, chloroplast precursor, putative [Ricinus communis]
	VF14253	2650	23.0464	14.885	18.4767	19.2566	14.3831	15.0169	Probable glycerol-3-phosphate dehydrogenase [NAD(+)] 1, cytosolic OS=Oryza sativa subsp. japonica (Rice) PE=2 SV=1	glycerol-3-phosphate dehydrogenase [Jatropha curcas]
	VF13152	2649	47.572	31.7912	34.8198	43.6001	37.6384	29.7829	ATP-dependent zinc metalloprotease FTSH 4, mitochondrial (Precursor) GN=FTSH4 OS=Arabidopsis thaliana (Mouse-ear cress) PE=1 SV=2	hypothetical protein JCGZ_07660 [Jatropha curcas]
	VF13527	2649	218.193	270.229	309.378	300.441	320.443	346.999	Luminal-binding protein 5 (Precursor) GN=BIP5 OS=Nicotiana tabacum (Common tobacco) PE=2 SV=1	hypothetical protein JCGZ_20411 [Jatropha curcas]
	VFNG5307	2649	4.16425	7.58033	8.25184	7.20162	6.0366	8.88571	#N/A	#N/A
	VF04410	2648	29.1724	20.0752	21.2917	25.2755	18.8907	21.1742	--	hypothetical protein JCGZ_08793 [Jatropha curcas]
	VF13334	2647	9.5539	0	0	0	0	0	Pentatricopeptide repeat-containing protein At4g30700 GN=T10C21.50 OS=Arabidopsis thaliana (Mouse-ear cress) PE=2 SV=1	pentatricopeptide repeat-containing protein, putative [Ricinus communis]
	VF16105	2647	61.6771	68.0216	73.358	70.7172	74.0441	79.4905	--	hypothetical protein JCGZ_23477 [Jatropha curcas]
	VF17051	2647	2.36957	5.04103	5.38812	3.33066	4.03455	6.44611	Aspartic proteinase PCS1 (Precursor) GN=T7H20.240 OS=Arabidopsis thaliana (Mouse-ear cress) PE=2 SV=1	hypothetical protein JCGZ_01430 [Jatropha curcas]
	VF20294	2647	6.916	0	0	0	0	0	--	conserved hypothetical protein [Ricinus communis]
	VF20595	2647	3.54247	22.7635	22.9655	7.90447	16.8771	25.0638	--	hypothetical protein JCGZ_11988 [Jatropha curcas]
	VF11969	2646	27.5502	35.0565	34.9181	36.7227	37.9642	41.2874	Protein IQ-DOMAIN 1 GN=IQD1 OS=Arabidopsis thaliana (Mouse-ear cress) PE=1 SV=1	hypothetical protein JCGZ_13784 [Jatropha curcas]
	VF20050	2646	17.9755	48.4909	56.6868	24.6411	43.7893	58.2747	Nudix hydrolase 26, chloroplastic (Precursor) OS=Arabidopsis thaliana (Mouse-ear cress) PE=1 SV=1	hypothetical protein JCGZ_10650 [Jatropha curcas]
	VFNG2210	2645	13.3699	6.87199	7.01315	12.046	7.94009	6.72407	Putative ribonuclease H protein At1g65750 GN=At1g65750 OS=Arabidopsis thaliana (Mouse-ear cress) PE=3 SV=1	PREDICTED: uncharacterized protein LOC104902493 [Beta vulgaris subsp. vulgaris]
	VF01737	2644	28.8082	6.81958	6.41635	22.7739	8.1006	8.46592	--	Histidine-containing phosphotransfer protein, putative [Ricinus communis]
	VF04031	2644	12.1195	38.6371	32.2806	19.5826	35.6668	35.7096	Nitrile-specifier protein 5 GN=NSP5 OS=Arabidopsis thaliana (Mouse-ear cress) PE=2 SV=1	hypothetical protein JCGZ_18512 [Jatropha curcas]
	VF07799	2644	36.2569	26.1674	24.6339	31.1032	29.617	26.9143	Sodium/hydrogen exchanger 6 GN=NHX6 OS=Arabidopsis thaliana (Mouse-ear cress) PE=1 SV=3	PREDICTED: sodium/hydrogen exchanger 6-like [Prunus mume]
	VFNG1147	2644	9.63233	6.72638	6.25171	8.42124	7.95006	5.81818	#N/A	#N/A
	VF17380	2643	39.3405	25.9664	25.5899	29.8928	32.7801	22.1653	--	hypothetical protein JCGZ_13315 [Jatropha curcas]
	VFNG451	2643	17.2053	7.33089	7.57738	15.6602	9.0143	5.68379	--	aldose-1-epimerase, putative [Ricinus communis]
	VFNG4943	2643	13.3361	6.86298	4.32785	8.06621	8.44865	6.21875	#N/A	#N/A
	VF23634	2642	44.3991	7.37479	6.46285	32.6166	8.33543	11.2408	Wall-associated receptor kinase-like 14 (Precursor) GN=WAKL14 OS=Arabidopsis thaliana (Mouse-ear cress) PE=2 SV=2	hypothetical protein JCGZ_12301 [Jatropha curcas]
	VF11759	2640	35.7424	26.1275	24.9384	30.6828	30.027	26.3381	--	hypothetical protein JCGZ_07013 [Jatropha curcas]
	VF20661	2639	83.1672	49.9469	50.8246	76.5095	59.0708	46.351	Cullin-1 GN=CUL1 OS=Arabidopsis thaliana (Mouse-ear cress) PE=1 SV=1	hypothetical protein JCGZ_24333 [Jatropha curcas]
	VFNG2980	2639	15.6299	12.9603	12.7175	12.2378	11.7321	11.7796	--	hypothetical protein JCGZ_17007 [Jatropha curcas]
	VF02935	2639	109.775	77.9455	60.6999	72.8761	71.3458	70.5719	DEAD-box ATP-dependent RNA helicase 56 GN=F2I11.90 OS=Arabidopsis thaliana (Mouse-ear cress) PE=1 SV=2	hypothetical protein JCGZ_06153 [Jatropha curcas]
	VF24844	2638	54.732	39.259	38.8576	48.0946	46.5039	34.1299	SART-1 family protein DOT2 {ECO:0000305} OS=Arabidopsis thaliana (Mouse-ear cress) PE=1 SV=1	hypothetical protein JCGZ_07734 [Jatropha curcas]
	VF25268	2638	16.0921	9.96633	10.5354	13.4687	12.7863	10.3803	Poly(A)-specific ribonuclease PARN GN=F14J16.11 OS=Arabidopsis thaliana (Mouse-ear cress) PE=1 SV=2	hypothetical protein JCGZ_22700 [Jatropha curcas]
	VF26881	2638	3.99671	0.338611	0.263968	3.14047	0.342423	0.346783	11-oxo-beta-amyrin 30-oxidase GN=CYP72A154 OS=Glycyrrhiza uralensis (Chinese licorice) PE=1 SV=1	cytochrome P450, putative [Ricinus communis]
	VF07892	2637	0.0620266	3.35726	5.32903	3.74374	3.4028	4.30018	Amidophosphoribosyltransferase 2, chloroplastic (Precursor) GN=At4g34740 OS=Arabidopsis thaliana (Mouse-ear cress) PE=1 SV=1	hypothetical protein JCGZ_19632 [Jatropha curcas]
	VF10091	2636	5.8004	11.8706	12.5178	12.7197	11.7503	17.9358	--	hypothetical protein RCOM_1613720 [Ricinus communis]
	VF17723	2636	20.3014	27.7542	32.7869	22.473	32.0367	35.5926	Ras-related protein RABB1b GN=F4B14.130 OS=Arabidopsis thaliana (Mouse-ear cress) PE=2 SV=1	GTP-binding 2 [Theobroma cacao]
	VF25877	2636	46.385	77.0105	85.7841	92.2412	88.1185	101.158	--	hypothetical protein JCGZ_18470 [Jatropha curcas]
	VF17865	2636	15.6551	13.142	11.3171	12.9857	11.8591	12.4187	--	hydrolase, putative [Ricinus communis]
	VF15428	2635	23.7496	21.5009	18.711	22.0619	19.5364	17.7171	--	hypothetical protein JCGZ_07278 [Jatropha curcas]
	VF16798	2635	119.021	160.458	179.996	152.764	207.699	219.256	Isocitrate dehydrogenase [NADP] OS=Nicotiana tabacum (Common tobacco) PE=2 SV=1	hypothetical protein JCGZ_10511 [Jatropha curcas]
	VF10534	2635	199.733	36.9315	17.0721	14.6485	15.2164	15.0399	#N/A	#N/A
	VF13515	2634	151.076	6.60694	6.15788	116.961	22.1401	13.127	RING-H2 zinc finger protein RHA4a GN=RHA4A OS=Arabidopsis thaliana (Mouse-ear cress) PE=2 SV=1	hypothetical protein JCGZ_20422 [Jatropha curcas]
	VF23180	2633	8.69956	7.7378	6.84029	7.62872	7.69402	6.55947	--	hypothetical protein JCGZ_17469 [Jatropha curcas]
	VF18474	2632	43.9639	24.9992	23.2961	35.2435	32.4591	26.0433	Chaperone protein dnaJ 11, chloroplastic (Precursor) GN=T19K4.170 OS=Arabidopsis thaliana (Mouse-ear cress) PE=1 SV=2	hypothetical protein JCGZ_13188 [Jatropha curcas]
	VF22189	2632	110.5	63.7618	62.7462	84.9361	73.1059	74.4505	Serine/threonine-protein kinase GRIK2 GN=MUF9.18 OS=Arabidopsis thaliana (Mouse-ear cress) PE=1 SV=1	calcium/calmodulin-dependent protein kinase kinase, putative [Ricinus communis]
	VF19160	2632	12.7836	9.8669	7.73089	8.50766	7.24356	7.65539	--	hypothetical protein JCGZ_23927 [Jatropha curcas]
	VF08871	2631	25.5377	37.208	39.09	38.6708	38.7923	50.9357	Ubiquitin-conjugating enzyme E2 14 GN=T22E16.40 OS=Arabidopsis thaliana (Mouse-ear cress) PE=1 SV=1	Ubiquitin-conjugating enzyme E2 13 family protein [Populus trichocarpa]
	VF05560	2630	57.7369	26.862	28.2116	51.9089	22.8327	21.7687	CBL-interacting serine/threonine-protein kinase 21 GN=MUA2.22 OS=Arabidopsis thaliana (Mouse-ear cress) PE=1 SV=1	hypothetical protein JCGZ_23015 [Jatropha curcas]
	VF06762	2630	17.7932	13.8606	13.4263	12.3346	12.2178	11.1449	--	hypothetical protein JCGZ_05045 [Jatropha curcas]
	VF10017	2630	40.7417	30.308	35.1801	34.4347	34.8942	30.4145	Probable protein S-acyltransferase 14 GN=PAT14 OS=Arabidopsis thaliana (Mouse-ear cress) PE=2 SV=1	hypothetical protein JCGZ_14528 [Jatropha curcas]
	VF22900	2630	20.4847	14.1816	13.4684	12.9154	12.5026	7.23923	#N/A	#N/A
	VF13085	2629	5.21161	3.56795	1.17998	3.32334	2.6837	1.5224	Putative GATA transcription factor 22 GN=GATA22 OS=Arabidopsis thaliana (Mouse-ear cress) PE=3 SV=1	hypothetical protein JCGZ_07671 [Jatropha curcas]
	VF15366	2629	45.6415	20.4395	23.0098	28.2554	24.2423	26.4458	--	hypothetical protein JCGZ_17265 [Jatropha curcas]
	VF00279	2628	27.696	22.4534	21.2657	26.1639	23.9733	19.364	Methylmalonate-semialdehyde dehydrogenase [acylating], mitochondrial (Precursor) OS=Arabidopsis thaliana (Mouse-ear cress) PE=2 SV=2	methylmalonate-semialdehyde dehydrogenase, putative [Ricinus communis]
	VF16042	2628	1.45534e-05	3.40777	2.89261	1.77088	1.74007	4.67864	V-type proton ATPase subunit D GN=T20N10_80 OS=Arabidopsis thaliana (Mouse-ear cress) PE=1 SV=2	hypothetical protein JCGZ_23418 [Jatropha curcas]
	VF17395	2628	39.7549	21.8955	20.8433	21.9311	20.3319	22.1291	#N/A	#N/A
	VF00325	2627	51.5426	28.7122	26.1742	43.7615	33.3385	30.8128	Transcription factor HBP-1a OS=Triticum aestivum (Wheat) PE=2 SV=1	hypothetical protein JCGZ_15542 [Jatropha curcas]
	VF23386	2627	28.1635	23.4196	17.9302	25.1842	19.2116	16.8959	Transcription factor SPATULA OS=Arabidopsis thaliana (Mouse-ear cress) PE=1 SV=1	hypothetical protein PHAVU_002G0176001g, partial [Phaseolus vulgaris]
	VF24682	2627	20.2221	16.2321	14.3793	18.2868	16.8756	15.5561	Alpha-ketoglutarate-dependent dioxygenase alkB GN=At1g11780 OS=Arabidopsis thaliana (Mouse-ear cress) PE=2 SV=2	hypothetical protein JCGZ_17964 [Jatropha curcas]
	VF18603	2627	139.214	179.894	201.821	174.681	192.707	183.451	Dolichyl-diphosphooligosaccharide--protein glycosyltransferase subunit 2 (Precursor) GN=F7J7.90 OS=Arabidopsis thaliana (Mouse-ear cress) PE=2 SV=1	hypothetical protein JCGZ_17674 [Jatropha curcas]
	VF20939	2627	203.377	144.066	116.843	144.339	132.229	140.037	30S ribosomal protein S21, chloroplastic (Fragment) GN=rps21 OS=Spinacia oleracea (Spinach) PE=1 SV=1	Ribosomal protein S21 family protein isoform 1 [Theobroma cacao]
	VF12524	2626	8.17204	10.7155	10.7358	10.9393	10.3368	11.0554	#N/A	#N/A
	VF00003	2625	29.8669	41.4371	37.7213	33.4985	38.0748	45.8986	SEC12-like protein 2 GN=F2I9.9 OS=Arabidopsis thaliana (Mouse-ear cress) PE=1 SV=4	hypothetical protein JCGZ_04703 [Jatropha curcas]
	VF04717	2625	84.68	110.499	124.78	104.564	129.816	118.808	Ubiquitin domain-containing protein DSK2b GN=DSK2B OS=Arabidopsis thaliana (Mouse-ear cress) PE=1 SV=1	hypothetical protein JCGZ_22380 [Jatropha curcas]
	VF04964	2625	113.001	143.938	150.711	126.532	138.282	141.309	Oxygen-dependent coproporphyrinogen-III oxidase, chloroplastic (Precursor) GN=CPX OS=Glycine max (Soybean) PE=1 SV=1	coproporphyrinogen III oxidase, putative [Ricinus communis]
	VF01063	2624	43.4041	21.8834	21.1916	34.9281	24.8716	25.924	--	GTP binding protein, putative [Ricinus communis]
	VF23494	2624	3.11168	0.811173	0.896394	1.58541	1.59265	1.24759	#N/A	#N/A
	VF26279	2624	76.1213	54.5381	47.8062	58.0906	59.152	54.5044	Formin-like protein 20 GN=MBK20.20/MBK20.21 OS=Arabidopsis thaliana (Mouse-ear cress) PE=2 SV=3	hypothetical protein JCGZ_11668 [Jatropha curcas]
	VF26302	2623	19.0118	10.4397	11.6527	11.4133	10.3393	11.266	Zinc finger protein ZAT4 GN=ZAT4 OS=Arabidopsis thaliana (Mouse-ear cress) PE=2 SV=1	hypothetical protein JCGZ_11693 [Jatropha curcas]
	VF27957	2623	10.1339	7.55409	6.19643	8.52171	7.88675	7.1913	LysM domain receptor-like kinase 3 (Precursor) GN=LYK3 OS=Arabidopsis thaliana (Mouse-ear cress) PE=2 SV=1	hypothetical protein JCGZ_07176 [Jatropha curcas]
	VF01133	2622	73.1738	45.7313	46.403	65.9622	48.4852	48.4837	Probable E3 ubiquitin-protein ligase ARI7 GN=ARI7 OS=Arabidopsis thaliana (Mouse-ear cress) PE=2 SV=1	hypothetical protein JCGZ_23756 [Jatropha curcas]
	VF08040	2622	10.3124	7.28875	7.46523	8.45935	5.53345	4.10732	Exocyst complex component EXO84C GN=EXO84C OS=Arabidopsis thaliana (Mouse-ear cress) PE=2 SV=1	hypothetical protein JCGZ_17649 [Jatropha curcas]
	VF17524	2622	120.912	98.8407	98.3401	103.514	86.0927	72.0295	GDP-mannose transporter GONST4 GN=GONST4 OS=Arabidopsis thaliana (Mouse-ear cress) PE=2 SV=1	GDP-mannose transporter, putative [Ricinus communis]
	VF18868	2622	47.7671	26.1696	23.6033	40.6872	32.6033	26.3023	--	hypothetical protein JCGZ_13127 [Jatropha curcas]
	VF21255	2622	21.16	12.4964	12.1806	18.1279	15.1724	13.4768	BON1-associated protein 1 GN=BAP1 OS=Arabidopsis thaliana (Mouse-ear cress) PE=1 SV=1	hypothetical protein JCGZ_18863 [Jatropha curcas]
	VF03840	2621	111.175	391.72	388.605	408.201	386.955	409.397	NADH dehydrogenase [ubiquinone] 1 alpha subcomplex subunit 1 GN=At3g08610 OS=Arabidopsis thaliana (Mouse-ear cress) PE=3 SV=1	hypothetical protein [Jatropha curcas]
	VFNG1335	2621	6.65751	4.71099	4.78575	4.20069	4.83037	3.70711	Disease resistance protein RGA2 GN=RGA2 OS=Solanum bulbocastanum (Wild potato) PE=1 SV=1	hypothetical protein JCGZ_21064 [Jatropha curcas]
	VF02327	2620	43.447	31.5015	29.1827	26.3786	28.4994	21.0532	Nuclear pore complex protein NUP96 {ECO:0000303|PubMed:21189294} OS=Arabidopsis thaliana (Mouse-ear cress) PE=1 SV=1	hypothetical protein JCGZ_27015 [Jatropha curcas]
	VF10260	2620	21.4066	30.7222	39.4558	31.6579	38.1775	49.5026	Glyoxylate/hydroxypyruvate reductase HPR3 GN=HPR3 OS=Arabidopsis thaliana (Mouse-ear cress) PE=2 SV=1	hypothetical protein JCGZ_20703 [Jatropha curcas]
	VF14061	2620	18.8237	11.7408	12.1524	10.4454	8.08275	7.74288	RNA polymerase sigma factor sigF, chloroplastic (Precursor) GN=T1J8 OS=Arabidopsis thaliana (Mouse-ear cress) PE=1 SV=1	hypothetical protein JCGZ_16530 [Jatropha curcas]
	VF16193	2620	13.3393	5.11958	5.45371	7.69177	6.98063	7.00049	Pentatricopeptide repeat-containing protein At1g08610 GN=At1g08610 OS=Arabidopsis thaliana (Mouse-ear cress) PE=2 SV=1	hypothetical protein JCGZ_23549 [Jatropha curcas]
	VFNG450	2618	114.933	33.3579	40.9201	97.544	51.4485	36.451	--	Gibberellin-regulated protein 3 precursor, putative [Ricinus communis]
	VF07515	2617	30.3737	9.28403	8.9108	26.8743	10.9074	7.62959	--	hypothetical protein RCOM_0504250 [Ricinus communis]
	VF26835	2617	8.56526	5.66928	4.43101	4.62873	4.585	4.54713	#N/A	#N/A
	VF06974	2616	100.977	146.198	180.376	130.435	186.963	226.1	Protein translation factor SUI1 homolog 1 GN=At4g27130 OS=Arabidopsis thaliana (Mouse-ear cress) PE=1 SV=2	translation factor sui1, putative [Ricinus communis]
	VF13571	2616	8.78828	6.87159	5.28687	7.39549	5.10163	5.63802	--	hypothetical protein JCGZ_20364 [Jatropha curcas]
	VF11950	2616	9.59412	1.89043	0.000132442	0.000135041	0.000856853	0.000125925	Transcription factor TCP4 GN=K15M2.17 OS=Arabidopsis thaliana (Mouse-ear cress) PE=2 SV=1	hypothetical protein JCGZ_09840 [Jatropha curcas]
	VF03514	2615	43.3763	34.4661	38.5776	39.4771	35.4451	35.57	Nucleosome assembly protein 1;2 (Precursor) GN=F3P11.8 OS=Arabidopsis thaliana (Mouse-ear cress) PE=1 SV=1	hypothetical protein JCGZ_24757 [Jatropha curcas]
	VF05940	2615	41.6964	35.2574	29.9783	31.8128	34.1677	28.7778	Pentatricopeptide repeat-containing protein At4g18975, chloroplastic (Precursor) GN=At4g18975 OS=Arabidopsis thaliana (Mouse-ear cress) PE=2 SV=2	hypothetical protein JCGZ_24025 [Jatropha curcas]
	VF13597	2614	33.7723	24.6985	25.2657	27.2157	19.5109	14.9759	Adenine nucleotide transporter BT1, chloroplastic/mitochondrial (Precursor) GN=F8B4.100 OS=Arabidopsis thaliana (Mouse-ear cress) PE=1 SV=1	hypothetical protein JCGZ_13311 [Jatropha curcas]
	VF15982	2614	30.7587	21.9259	21.0511	23.813	25.0736	22.437	--	protein binding protein, putative [Ricinus communis]
	VF19179	2614	16.8509	12.6583	11.3472	13.9683	13.9353	12.5926	--	hypothetical protein JCGZ_20079 [Jatropha curcas]
	VF19891	2614	109.947	67.7584	31.4543	79.6814	63.8526	48.781	Alkane hydroxylase MAH1 {ECO:0000303|PubMed:17905869} OS=Arabidopsis thaliana (Mouse-ear cress) PE=2 SV=1	hypothetical protein JCGZ_09411 [Jatropha curcas]
	VF04080	2614	34.1815	43.724	44.2288	41.4822	44.5956	42.1277	#N/A	#N/A
	VF03258	2612	51.1127	43.5722	43.2043	42.2749	45.1761	38.3286	KH domain-containing protein At4g18375 GN=At4g18375 OS=Arabidopsis thaliana (Mouse-ear cress) PE=2 SV=1	hypothetical protein JCGZ_03234 [Jatropha curcas]
	VF11613	2611	12.5138	15.3241	14.4949	13.2385	15.7158	15.7843	CBL-interacting serine/threonine-protein kinase 11 GN=At2g30360 OS=Arabidopsis thaliana (Mouse-ear cress) PE=1 SV=1	hypothetical protein JCGZ_14172 [Jatropha curcas]
	VF01427	2610	17.6235	12.7624	10.8804	13.8965	8.64014	11.0508	--	protein with unknown function [Ricinus communis]
	VF11683	2610	14.6061	1.78877	2.25123	11.2473	2.7636	3.19583	GDP-mannose transporter GONST3 GN=GONST3 OS=Arabidopsis thaliana (Mouse-ear cress) PE=2 SV=1	GDP-mannose transporter, putative [Ricinus communis]
	VF13850	2610	12.5286	7.83916	7.653	7.07579	7.28533	7.09179	Pentatricopeptide repeat-containing protein At2g27800, mitochondrial (Precursor) GN=At2g27800 OS=Arabidopsis thaliana (Mouse-ear cress) PE=3 SV=2	Tetratricopeptide repeat-like superfamily protein, putative [Theobroma cacao]
	VF04927	2609	35.4973	28.8458	32.291	31.536	30.2541	29.6524	--	hypothetical protein JCGZ_13416 [Jatropha curcas]
	VF06873	2608	59.2814	80.6189	95.7475	72.7207	80.91	86.8988	--	hypothetical protein JCGZ_26280 [Jatropha curcas]
	VF18223	2607	20.6606	16.3568	17.4692	17.1513	17.9627	14.0463	--	hypothetical protein JCGZ_08764 [Jatropha curcas]
	VF24249	2606	30.3222	19.7819	18.2774	28.7061	21.8377	16.5127	--	hypothetical protein JCGZ_20598 [Jatropha curcas]
	VF06544	2605	6.00709	3.3716	2.81343	2.592	1.37393	1.78199	Protein ROOT PRIMORDIUM DEFECTIVE 1 GN=RPD1 OS=Arabidopsis thaliana (Mouse-ear cress) PE=1 SV=1	hypothetical protein JCGZ_25187 [Jatropha curcas]
	VF16229	2605	46.2333	8.7904	6.02914	34.474	16.6139	12.9617	--	hypothetical protein JCGZ_23580 [Jatropha curcas]
	VF03875	2604	8.31009	4.27113	3.78603	6.21869	4.91452	5.08611	Pentatricopeptide repeat-containing protein At5g42310, mitochondrial (Precursor) GN=At5g42310 OS=Arabidopsis thaliana (Mouse-ear cress) PE=2 SV=1	pentatricopeptide repeat-containing protein, putative [Ricinus communis]
	VF07212	2604	50.8627	29.0374	29.5505	34.0776	29.0788	33.3498	Lon protease homolog 2, peroxisomal {ECO:0000255|HAMAP-Rule:MF_03121} GN=LON2 OS=Arabidopsis thaliana (Mouse-ear cress) PE=2 SV=1	hypothetical protein JCGZ_11875 [Jatropha curcas]
	VFNG3298	2604	2.92749	1.19816	0.699036	1.3318	1.39672	1.24198	--	conserved hypothetical protein [Ricinus communis]
	VF23114	2603	52.0771	36.6612	28.0947	35.1926	37.6843	32.8594	Calcineurin B-like protein 1 OS=Arabidopsis thaliana (Mouse-ear cress) PE=1 SV=3	hypothetical protein JCGZ_17136 [Jatropha curcas]
	VF11436	2602	5.04112	2.56227	2.36684	3.7921	3.67363	2.59561	Transcription factor bHLH112 GN=T13M11.1 OS=Arabidopsis thaliana (Mouse-ear cress) PE=2 SV=1	hypothetical protein JCGZ_21311 [Jatropha curcas]
	VF21460	2602	58.7585	41.4572	48.2389	51.0017	41.2309	31.4566	Probable diphthine synthase GN=At4g31790 OS=Arabidopsis thaliana (Mouse-ear cress) PE=2 SV=1	diphthine synthase, putative [Ricinus communis]
	VF23691	2601	10.0626	4.70077	5.11424	9.34072	5.08568	3.98795	ABC transporter G family member 10 GN=F12M16.17 OS=Arabidopsis thaliana (Mouse-ear cress) PE=3 SV=1	hypothetical protein JCGZ_12249 [Jatropha curcas]
	VF08541	2600	3.44665	2.28994	2.66454	3.13603	2.59952	2.42042	#N/A	#N/A
	VF09904	2600	38.8771	65.0204	59.7689	66.1216	68.7881	84.4808	Actin-related protein 2/3 complex subunit 5A GN=T15B16.22 OS=Arabidopsis thaliana (Mouse-ear cress) PE=1 SV=2	hypothetical protein PRUPE_ppa013215mg [Prunus persica]
	VF21411	2600	11.5383	6.01972	3.71077	7.8426	6.8436	6.06311	Glucose-1-phosphate adenylyltransferase large subunit 3, chloroplastic/amyloplastic (Precursor) GN=AGPS3 OS=Solanum tuberosum (Potato) PE=1 SV=1	hypothetical protein PRUPE_ppa008581mg [Prunus persica]
	VF23517	2600	138.052	103.532	103.252	133.32	109.772	98.1753	Guanine nucleotide-binding protein-like NSN1 {ECO:0000305} OS=Arabidopsis thaliana (Mouse-ear cress) PE=2 SV=1	hypothetical protein JCGZ_06568 [Jatropha curcas]
	VF04817	2598	19.6133	31.8554	25.5524	27.6296	27.7749	31.4883	--	hypothetical protein JCGZ_18399 [Jatropha curcas]
	VF14050	2597	299.561	99.9871	137.176	122.665	120.286	119.391	Membrane magnesium transporter (Precursor) GN=At5g03345 OS=Arabidopsis thaliana (Mouse-ear cress) PE=2 SV=1	conserved hypothetical protein [Ricinus communis]
	VF16202	2597	19.099	13.7248	13.352	13.9986	14.4222	14.062	Peroxisome biogenesis protein 12 GN=T27C4.11 OS=Arabidopsis thaliana (Mouse-ear cress) PE=1 SV=2	conserved hypothetical protein [Ricinus communis]
	VF04285	2596	32.144	24.5128	24.3673	26.6491	27.4243	25.4755	DNA ligase 4 GN=LIG4 OS=Arabidopsis thaliana (Mouse-ear cress) PE=1 SV=1	PREDICTED: DNA ligase 4 isoform X1 [Vitis vinifera]
	VF14273	2596	9.92878	5.30357	6.3512	5.79842	6.8222	5.29453	Putative disease resistance protein At3g14460 GN=At3g14460 OS=Arabidopsis thaliana (Mouse-ear cress) PE=3 SV=1	Disease resistance protein RPM1, putative [Ricinus communis]
	VF26568	2596	78.9054	40.8862	40.0898	71.7649	52.0204	36.0435	Putative DEAD-box ATP-dependent RNA helicase 29 GN=RH29 OS=Arabidopsis thaliana (Mouse-ear cress) PE=3 SV=1	hypothetical protein JCGZ_05707 [Jatropha curcas]
	VF20118	2594	8.42351	4.77725	6.11993	7.3993	5.54643	5.16069	DNA repair protein REV1 GN=REV1 OS=Arabidopsis thaliana (Mouse-ear cress) PE=2 SV=1	hypothetical protein JCGZ_16331 [Jatropha curcas]
	VF12822	2592	0.784436	2.26164	2.81479	1.60491	2.00305	2.23245	Nodulation-signaling pathway 2 protein GN=NSP2 OS=Medicago truncatula (Barrel medic) PE=1 SV=1	hypothetical protein JCGZ_12067 [Jatropha curcas]
	VF19203	2592	19.8409	15.4287	14.8909	17.6469	15.2962	16.247	--	hypothetical protein JCGZ_16160 [Jatropha curcas]
	VF22223	2592	10.032	40.4915	39.4497	38.6259	36.3727	69.16	--	conserved hypothetical protein [Ricinus communis]
	VF18816	2591	9.26271	13.6578	18.2871	11.8494	15.9505	16.985	Shikimate kinase 1, chloroplastic (Precursor) GN=SK1 OS=Arabidopsis thaliana (Mouse-ear cress) PE=1 SV=2	hypothetical protein JCGZ_09404 [Jatropha curcas]
	VF18990	2591	20.0281	11.9431	8.48477	11.7145	11.9861	11.3599	--	PREDICTED: uncharacterized protein LOC104091117 isoform X2 [Nicotiana tomentosiformis]
	VF25870	2591	11.3853	3.52751	0	3.05522	0	2.46308	#N/A	#N/A
	VF00877	2590	181.814	105.245	109.341	83.4597	106.34	68.6606	--	--
	VF10041	2590	23.8849	19.1843	19.1668	18.0832	19.0994	15.1897	--	hypothetical protein JCGZ_14508 [Jatropha curcas]
	VF04699	2589	73.2723	57.6452	60.3327	54.6776	53.5815	49.7069	Protein BASIC PENTACYSTEINE2 OS=Arabidopsis thaliana (Mouse-ear cress) PE=1 SV=1	hypothetical protein JCGZ_04824 [Jatropha curcas]
	VF06077	2589	8.59884	7.5535	6.47156	7.08459	6.00643	5.60868	Pentatricopeptide repeat-containing protein MRL1, chloroplastic (Precursor) GN=T11I11.70/T11I11.60 OS=Arabidopsis thaliana (Mouse-ear cress) PE=2 SV=2	hypothetical protein JCGZ_19607 [Jatropha curcas]
	VF14536	2589	67.242	49.6978	53.6184	64.1916	54.606	45.2635	--	hypothetical protein JCGZ_05276 [Jatropha curcas]
	VF16212	2588	56.3212	24.0104	28.179	46.1357	34.4169	30.0576	Protein CHROMATIN REMODELING 20 {ECO:0000303|PubMed:16547115} OS=Arabidopsis thaliana (Mouse-ear cress) PE=2 SV=2	hypothetical protein JCGZ_23567 [Jatropha curcas]
	VF22963	2588	34.0299	18.294	11.3744	16.9506	15.8961	16.785	--	hypothetical protein POPTR_0017s02700g [Populus trichocarpa]
	VF11637	2587	13.2864	7.35971	5.37371	12.0313	8.2705	5.20208	--	hypothetical protein JCGZ_14147 [Jatropha curcas]
	VF09391	2585	3.46765	9.70227	9.39277	6.74193	7.73458	8.09947	--	3&apos;-5&apos; exonuclease, putative [Ricinus communis]
	VF22784	2583	143.215	1.13872	0.407155	117.509	29.7498	0.317414	PHD finger protein MALE STERILITY 1 GN=MS1 OS=Arabidopsis thaliana (Mouse-ear cress) PE=1 SV=1	hypothetical protein JCGZ_04821 [Jatropha curcas]
	VF05234	2582	15.1334	25.6934	27.6807	18.3748	28.1186	26.2279	--	hypothetical protein JCGZ_11564 [Jatropha curcas]
	VF10404	2582	243.127	180.115	172.598	158.46	163.547	155.657	U2 small nuclear ribonucleoprotein B&apos;&apos; GN=U2B&apos;&apos; OS=Arabidopsis thaliana (Mouse-ear cress) PE=1 SV=1	hypothetical protein JCGZ_17367 [Jatropha curcas]
	VFNG2246	2580	2.32861	1.75989	1.25914	1.37495	1.3035	1.24461	G-type lectin S-receptor-like serine/threonine-protein kinase At1g11330 (Precursor) GN=At1g11330 OS=Arabidopsis thaliana (Mouse-ear cress) PE=2 SV=3	hypothetical protein POPTR_0011s03920g [Populus trichocarpa]
	VF00919	2579	3.79887	8.98635	10.2277	6.83586	7.10461	8.87376	Guanosine nucleotide diphosphate dissociation inhibitor At5g09550 GN=At5g09550 OS=Arabidopsis thaliana (Mouse-ear cress) PE=3 SV=1	hypothetical protein JCGZ_22392 [Jatropha curcas]
	VF06994	2579	30.2772	24.542	26.683	25.8999	27.3559	24.0184	Protein MOS2 GN=MOS2 OS=Arabidopsis thaliana (Mouse-ear cress) PE=2 SV=1	Protein MOS2, putative [Ricinus communis]
	VF01501	2578	16.3532	11.2367	11.7617	14.1753	13.7864	11.3725	--	hypothetical protein JCGZ_13877 [Jatropha curcas]
	VF05217	2578	61.1758	23.7097	23.5045	37.4309	41.9378	24.6443	Polynucleotide 5&apos;-hydroxyl-kinase NOL9 GN=At5g11010 OS=Arabidopsis thaliana (Mouse-ear cress) PE=2 SV=1	hypothetical protein JCGZ_11550 [Jatropha curcas]
	VF07001	2578	16.0645	0.62444	1.24049	13.0758	3.38451	1.26084	#N/A	#N/A
	VF07959	2578	7.64577	5.27681	4.12674	4.11414	3.71384	3.83017	Protein PLASTID MOVEMENT IMPAIRED 2 GN=F4N21.22 OS=Arabidopsis thaliana (Mouse-ear cress) PE=1 SV=1	Myosin heavy chain, putative [Ricinus communis]
	VF21012	2578	659.677	226.772	255.878	314.779	289.808	315.839	Dolichyl-diphosphooligosaccharide--protein glycosyltransferase subunit 4A GN=OST4A OS=Oryza sativa subsp. japonica (Rice) PE=3 SV=1	unnamed protein product [Vitis vinifera]
	VF04952	2577	48.6674	25.9303	28.8393	36.1183	33.0803	32.2445	CMP-sialic acid transporter 3 GN=UTR6 OS=Arabidopsis thaliana (Mouse-ear cress) PE=2 SV=1	hypothetical protein JCGZ_18072 [Jatropha curcas]
	VFNG4258	2577	14.6282	8.69954	8.24418	12.1977	10.7358	9.51883	Protein FAR1-RELATED SEQUENCE 5 GN=FRS5 OS=Arabidopsis thaliana (Mouse-ear cress) PE=2 SV=1	hypothetical protein JCGZ_10520 [Jatropha curcas]
	VF04839	2575	45.7741	34.9883	32.4564	37.2049	35.8009	36.5131	--	hypothetical protein JCGZ_17518 [Jatropha curcas]
	VF21410	2574	12.6492	10.2644	9.53713	9.44546	10.5565	8.32887	DEAD-box ATP-dependent RNA helicase 58, chloroplastic (Precursor) GN=RH58 OS=Arabidopsis thaliana (Mouse-ear cress) PE=2 SV=1	hypothetical protein JCGZ_02130 [Jatropha curcas]
	VF26178	2574	17.3374	10.4719	9.81956	11.7801	12.2194	11.4563	#N/A	#N/A
	VFNG2541	2574	10.0699	5.53416	5.33896	9.33409	6.03341	5.35891	Putative ribonuclease H protein At1g65750 GN=At1g65750 OS=Arabidopsis thaliana (Mouse-ear cress) PE=3 SV=1	hypothetical protein PRUPE_ppa016553mg [Prunus persica]
	VF02221	2573	16.091	11.6007	12.2412	11.753	11.4639	11.7686	Probable magnesium transporter NIPA6 GN=At2g21120 OS=Arabidopsis thaliana (Mouse-ear cress) PE=2 SV=1	hypothetical protein JCGZ_19583 [Jatropha curcas]
	VF24066	2572	3.98574	1.99681	1.90472	1.42618	1.60794	1.37374	Pentatricopeptide repeat-containing protein At1g22960, mitochondrial (Precursor) GN=At1g22960 OS=Arabidopsis thaliana (Mouse-ear cress) PE=2 SV=1	PREDICTED: pentatricopeptide repeat-containing protein At1g22960, mitochondrial-like [Pyrus x bretschneideri]
	VF10263	2571	23.5384	19.3751	12.7676	16.2828	15.5158	13.4752	PGR5-like protein 1A, chloroplastic (Precursor) GN=PGRL1A OS=Arabidopsis thaliana (Mouse-ear cress) PE=1 SV=1	hypothetical protein JCGZ_20689 [Jatropha curcas]
	VF19405	2571	16.943	9.64984	10.0921	13.02	10.9571	11.723	Piezo-type mechanosensitive ion channel homolog GN=T9J23.19/T9J23.20/T9J23.21 OS=Arabidopsis thaliana (Mouse-ear cress) PE=2 SV=1	PREDICTED: piezo-type mechanosensitive ion channel homolog isoform X1 [Populus euphratica]
	VF24582	2571	97.4163	50.9554	46.4398	48.9505	45.456	50.7099	Plastidal glycolate/glycerate translocator 1, chloroplastic (Precursor) GN=PLGG1 OS=Arabidopsis thaliana (Mouse-ear cress) PE=2 SV=1	conserved hypothetical protein [Ricinus communis]
	VF05501	2570	15.2738	25.7253	20.7991	22.9231	26.2809	30.3044	Putative gamma-glutamylcyclotransferase At3g02910 GN=At3g02910 OS=Arabidopsis thaliana (Mouse-ear cress) PE=2 SV=2	hypothetical protein JCGZ_02560 [Jatropha curcas]
	VF07830	2570	12.5168	8.40649	8.56537	7.89019	8.47087	7.88976	Probable protein phosphatase 2C BIPP2C1 GN=BIPP2C1 OS=Oryza sativa subsp. japonica (Rice) PE=2 SV=1	hypothetical protein JCGZ_20202 [Jatropha curcas]
	VF11424	2570	129.412	196.962	230.829	148.169	199.057	218.43	Alpha-soluble NSF attachment protein OS=Vitis vinifera (Grape) PE=2 SV=1	hypothetical protein JCGZ_03365 [Jatropha curcas]
	VF23631	2570	11.908	7.9642	8.9111	10.0887	9.91713	8.40507	--	PREDICTED: uncharacterized protein LOC105126489 isoform X3 [Populus euphratica]
	VF09113	2570	4.29477	3.20146	2.93147	3.06754	2.53205	2.96086	#N/A	#N/A
	VF20528	2569	34.8135	30.3952	29.9554	28.6313	28.1577	26.7474	MLO-like protein 12 GN=MLO12 OS=Arabidopsis thaliana (Mouse-ear cress) PE=2 SV=2	hypothetical protein EUTSA_v10023372mg [Eutrema salsugineum]
	VF13202	2569	29.7344	51.6907	52.6512	48.4621	50.6227	47.9552	60S ribosomal protein L6, mitochondrial GN=RPL6 OS=Marchantia polymorpha (Liverwort) PE=3 SV=2	hypothetical protein EUGRSUZ_H01271 [Eucalyptus grandis]
	VF16458	2567	73.402	60.0306	58.0231	57.1747	62.4204	56.1385	#N/A	#N/A
	VF20493	2567	92.0401	128.483	129.461	114.582	140.481	124.765	Asparagine--tRNA ligase, chloroplastic/mitochondrial (Precursor) GN=dl4685w OS=Arabidopsis thaliana (Mouse-ear cress) PE=2 SV=3	aspartyl-tRNA synthetase, putative [Ricinus communis]
	VF23122	2567	17.5847	12.5252	10.0093	16.4415	10.7753	10.2565	Probable receptor-like protein kinase At5g47070 GN=At5g47070 OS=Arabidopsis thaliana (Mouse-ear cress) PE=1 SV=1	hypothetical protein JCGZ_11891 [Jatropha curcas]
	VF26951	2567	22.2555	31.4445	37.0493	29.0579	36.6679	33.0329	Zinc finger CCCH domain-containing protein 48 GN=ZFWD1 OS=Arabidopsis thaliana (Mouse-ear cress) PE=2 SV=1	hypothetical protein JCGZ_26167 [Jatropha curcas]
	VF27645	2567	6.72566	0.0864638	0.0291751	5.63217	1.05811	0.0117351	Probable LRR receptor-like serine/threonine-protein kinase At5g65240 (Precursor) GN=At5g65240 OS=Arabidopsis thaliana (Mouse-ear cress) PE=2 SV=1	hypothetical protein JCGZ_17726 [Jatropha curcas]
	VF10327	2566	13.423	29.8364	22.3827	21.7966	31.9083	29.0142	Protein tesmin/TSO1-like CXC 5 GN=TCX5 OS=Arabidopsis thaliana (Mouse-ear cress) PE=1 SV=1	hypothetical protein JCGZ_07765 [Jatropha curcas]
	VF11099	2566	14.6751	8.98392	8.9003	13.6467	8.97474	8.94665	--	hypothetical protein JCGZ_19318 [Jatropha curcas]
	VF14960	2566	24.4068	44.009	47.7569	42.6142	39.3608	43.4776	Putative DNA-binding protein ESCAROLA GN=ESC OS=Arabidopsis thaliana (Mouse-ear cress) PE=2 SV=1	hypothetical protein JCGZ_22423 [Jatropha curcas]
	VF02137	2565	52.137	92.1543	110.514	81.7482	81.6011	96.455	--	hypothetical protein JCGZ_01323 [Jatropha curcas]
	VF05919	2565	2.19968	1.13492	1.51843	1.6585	1.5647	0.693383	Putative pentatricopeptide repeat-containing protein At2g01510 OS=Arabidopsis thaliana (Mouse-ear cress) PE=3 SV=1	hypothetical protein JCGZ_26869 [Jatropha curcas]
	VF24308	2565	84.6729	59.1034	65.4113	79.7392	58.5878	57.557	Protein TRIGALACTOSYLDIACYLGLYCEROL 4, chloroplastic GN=F17A9.11 OS=Arabidopsis thaliana (Mouse-ear cress) PE=1 SV=1	hypothetical protein JCGZ_19095 [Jatropha curcas]
	VF26376	2565	6.11884	4.51784	4.42867	4.25226	4.52184	4.28458	ADP,ATP carrier protein ER-ANT1 GN=ER-ANT1 OS=Arabidopsis thaliana (Mouse-ear cress) PE=2 SV=2	hypothetical protein JCGZ_11757 [Jatropha curcas]
	VF08619	2564	3.40738	5.04555	5.98874	3.70931	5.51025	6.12782	--	PREDICTED: probable disease resistance protein At5g63020 [Populus euphratica]
	VF12778	2564	0.401366	1.29711	1.27565	1.23341	0.891632	1.82016	--	hypothetical protein JCGZ_24578 [Jatropha curcas]
	VFNG4117	2564	7.65482	3.79828	4.75074	5.30844	4.87169	4.89004	#N/A	#N/A
	VF10009	2563	16.5536	24.0155	22.7679	18.6557	24.5185	23.258	UDP-glucuronate 4-epimerase 3 GN=GAE3 OS=Arabidopsis thaliana (Mouse-ear cress) PE=2 SV=1	hypothetical protein JCGZ_14538 [Jatropha curcas]
	VF26320	2563	46.8479	27.9573	29.9721	32.8823	14.3695	10.5432	Chaperone protein ClpB1 GN=F1O17.2 OS=Arabidopsis thaliana (Mouse-ear cress) PE=1 SV=2	hypothetical protein JCGZ_11709 [Jatropha curcas]
	VF13454	2562	578.96	860.732	982.705	764.132	933.227	851.029	Ubiquitin-conjugating enzyme E2 28 GN=F22C12.2 OS=Arabidopsis thaliana (Mouse-ear cress) PE=2 SV=1	ubiquitin-conjugating enzyme E2, putative [Ricinus communis]
	VF17259	2562	104.937	42.6097	39.3755	92.9631	54.7043	43.0295	Dynein 8 kDa light chain, flagellar outer arm OS=Chlamydomonas reinhardtii (Chlamydomonas smithii) PE=1 SV=1	hypothetical protein JCGZ_26260 [Jatropha curcas]
	VF12239	2562	247.526	576.83	777.407	622.398	574.934	655.838	--	light-inducible protein atls1, putative [Ricinus communis]
	VF24145	2560	27.3278	46.0796	42.7349	31.5033	44.3444	44.1055	Calcium-dependent protein kinase 3 GN=F9D16.120 OS=Arabidopsis thaliana (Mouse-ear cress) PE=1 SV=1	hypothetical protein JCGZ_20515 [Jatropha curcas]
	VF07708	2559	11.4966	7.26518	7.11787	10.8864	7.14584	6.88059	Protein EI24 homolog GN=At4g06676 OS=Arabidopsis thaliana (Mouse-ear cress) PE=2 SV=1	hypothetical protein POPTR_0004s23100g [Populus trichocarpa]
	VF12933	2559	15.0694	7.52979	6.79623	13.1127	8.61157	8.2156	ABC transporter C family member 3 GN=MJG19.3 OS=Arabidopsis thaliana (Mouse-ear cress) PE=1 SV=1	PREDICTED: ABC transporter C family member 3-like [Populus euphratica]
	VF05022	2559	63.5241	41.3269	34.7952	43.8213	44.0943	42.7729	Protein Dr1 homolog GN=DR1 OS=Arabidopsis thaliana (Mouse-ear cress) PE=2 SV=1	TATA-binding protein-associated phosphoprotein, putative [Ricinus communis]
	VF26929	2559	5.43907	3.93785	2.45793	3.67964	3.54195	3.26407	Putative receptor protein kinase ZmPK1 (Precursor) GN=PK1 OS=Zea mays (Maize) PE=2 SV=2	hypothetical protein JCGZ_14810 [Jatropha curcas]
	VF02817	2558	9.38018	5.61377	6.2725	6.56591	5.04699	6.23476	GPCR-type G protein 1 GN=GTG1 OS=Arabidopsis thaliana (Mouse-ear cress) PE=1 SV=1	hypothetical protein JCGZ_04709 [Jatropha curcas]
	VF12577	2558	65.5616	40.2133	40.7838	63.2204	43.8658	35.4983	--	nucleotide binding protein, putative [Ricinus communis]
	VF15224	2558	17.2405	11.6627	10.9848	10.1264	7.32005	5.85076	--	hypothetical protein JCGZ_12053 [Jatropha curcas]
	VF12141	2556	66.5827	39.8701	43.9888	54.2665	43.9255	47.7338	--	hypothetical protein JCGZ_04102 [Jatropha curcas]
	VF25720	2556	19.0522	31.0119	35.106	23.1534	27.0414	36.7014	Monosaccharide-sensing protein 2 GN=MSSP2 OS=Arabidopsis thaliana (Mouse-ear cress) PE=1 SV=2	hypothetical protein JCGZ_10737 [Jatropha curcas]
	VF09504	2555	20.7493	10.9779	11.8031	16.5564	10.4792	13.1281	--	hypothetical protein JCGZ_06663 [Jatropha curcas]
	VF11231	2555	37.2345	18.1457	27.6339	30.1645	18.0095	15.8089	Rac-like GTP-binding protein 5 (Precursor) OS=Oryza sativa subsp. japonica (Rice) PE=2 SV=2	hypothetical protein JCGZ_14659 [Jatropha curcas]
	VF14777	2555	129.727	182.166	191.767	167.74	157.971	187.135	Thioredoxin M2, chloroplastic (Precursor) GN=At4g03520 OS=Arabidopsis thaliana (Mouse-ear cress) PE=2 SV=2	hypothetical protein JCGZ_25795 [Jatropha curcas]
	VF00237	2554	13.3435	25.1636	25.6154	16.9787	30.2521	27.3529	Valine--tRNA ligase GN=VALRS OS=Arabidopsis thaliana (Mouse-ear cress) PE=2 SV=2	hypothetical protein JCGZ_13191 [Jatropha curcas]
	VF03651	2553	36.9689	54.201	58.2001	44.2141	49.6023	52.9229	--	hypothetical protein JCGZ_19791 [Jatropha curcas]
	VF09068	2553	10.5601	22.0442	25.7414	25.2205	27.0264	38.5497	Phosphoserine aminotransferase 1, chloroplastic (Precursor) GN=PSAT1 OS=Arabidopsis thaliana (Mouse-ear cress) PE=1 SV=1	hypothetical protein JCGZ_22377 [Jatropha curcas]
	VF15228	2553	0.875038	1.60652	1.6127	1.10161	1.26787	1.77286	Thaumatin-like protein (Precursor) GN=At1g18250 OS=Arabidopsis thaliana (Mouse-ear cress) PE=2 SV=2	hypothetical protein JCGZ_12056 [Jatropha curcas]
	VF16938	2553	42.8189	33.715	31.4981	35.0751	26.7688	19.6891	Pentatricopeptide repeat-containing protein At3g49240 GN=EMB1796 OS=Arabidopsis thaliana (Mouse-ear cress) PE=2 SV=1	pentatricopeptide repeat-containing protein, putative [Ricinus communis]
	VF27386	2553	4.90337	0.0294772	0.501645	4.0848	0.387533	0.109427	Hexose carrier protein HEX6 GN=HEX6 OS=Ricinus communis (Castor bean) PE=2 SV=1	sugar transporter, putative [Ricinus communis]
	VFNG1728	2553	57.6147	0.571871	0.199365	48.1174	5.18377	0.886011	#N/A	#N/A
	VF02232	2552	8.14495	7.11686	7.07469	7.27663	6.43993	5.7806	Pentatricopeptide repeat-containing protein At1g20230 GN=PCMP-H21 OS=Arabidopsis thaliana (Mouse-ear cress) PE=2 SV=2	pentatricopeptide repeat-containing protein, putative [Ricinus communis]
	VF24511	2552	40.313	26.2162	24.986	38.2478	27.1755	25.1782	Chloroplastic group IIA intron splicing facilitator CRS1, chloroplastic (Precursor) GN=CRS1 OS=Zea mays (Maize) PE=1 SV=1	hypothetical protein JCGZ_02276 [Jatropha curcas]
	VF02510	2551	1.95114	1.32518	1.01725	1.49282	0.764984	0.215584	Glutamate receptor 2.7 (Precursor) GN=GLR2.7 OS=Arabidopsis thaliana (Mouse-ear cress) PE=2 SV=3	hypothetical protein POPTR_0018s002301g, partial [Populus trichocarpa]
	VF06006	2551	9.05228	5.63851	6.84974	5.72059	5.36213	3.89533	#N/A	#N/A
	VF11287	2551	7.65324	5.75324	5.37808	6.41234	6.49297	5.85665	--	hypothetical protein JCGZ_14609 [Jatropha curcas]
	VF20212	2551	591.552	1285.5	1689.61	1769.2	1664.79	1957.38	Small acidic protein 1 GN=SMAP1 OS=Arabidopsis thaliana (Mouse-ear cress) PE=1 SV=1	PREDICTED: small acidic protein 1-like [Citrus sinensis]
	VFNG2761	2550	3.33462	6.41276	7.22611	5.46402	5.32596	6.318	--	PREDICTED: uncharacterized protein LOC103449856 [Malus domestica]
	VF02528	2549	4.61226	2.40822	2.61273	2.96438	3.14427	2.86089	Putative disease resistance protein RGA4 GN=RGA4 OS=Solanum bulbocastanum (Wild potato) PE=2 SV=1	hypothetical protein JCGZ_24557 [Jatropha curcas]
	VF24428	2549	13.1236	9.85124	9.61669	9.14503	9.40796	6.33944	--	conserved hypothetical protein [Ricinus communis]
	VF26729	2549	25.6343	35.3285	35.3938	33.2011	44.1484	44.5676	Tubby-like F-box protein 7 GN=TULP7 OS=Arabidopsis thaliana (Mouse-ear cress) PE=2 SV=1	hypothetical protein JCGZ_10577 [Jatropha curcas]
	VF02604	2548	54.5974	32.0738	26.513	34.7302	40.8873	29.9349	#N/A	#N/A
	VF20034	2548	22.4656	31.8507	35.5895	26.2144	31.1397	32.1181	--	hypothetical protein JCGZ_24278 [Jatropha curcas]
	VF21247	2547	10.155	3.18956	4.56064	6.00588	4.73191	5.26413	--	hypothetical protein JCGZ_07980 [Jatropha curcas]
	VFNG3109	2547	23.7985	17.8531	14.5644	20.1499	15.1009	17.139	Glutathione S-transferase T1 GN=MEE6.28 OS=Arabidopsis thaliana (Mouse-ear cress) PE=2 SV=1	hypothetical protein JCGZ_20606 [Jatropha curcas]
	VF06048	2546	0.360869	3.22721	3.48612	3.03754	2.3313	3.16278	--	PREDICTED: uncharacterized protein DDB_G0271670-like isoform X1 [Populus euphratica]
	VF18019	2546	11.8978	19.9554	16.8975	17.1026	16.6031	18.4655	QWRF motif-containing protein 2 GN=QWRF2 OS=Arabidopsis thaliana (Mouse-ear cress) PE=2 SV=1	hypothetical protein JCGZ_16043 [Jatropha curcas]
	VF17614	2544	24.016	12.2865	11.2234	17.4962	14.7253	15.1372	Putative GTP diphosphokinase RSH1, chloroplastic (Precursor) GN=RSH1 OS=Arabidopsis thaliana (Mouse-ear cress) PE=1 SV=1	hypothetical protein JCGZ_13966 [Jatropha curcas]
	VFNG3928	2544	33.8335	19.7246	22.0799	30.6396	19.1164	20.5074	--	hypothetical protein JCGZ_19052 [Jatropha curcas]
	VF00134	2543	2.04614	1.43726	0.578488	1.48999	1.1519	0.605146	--	hypothetical protein JCGZ_10967 [Jatropha curcas]
	VF14751	2543	29.8819	23.9761	24.7614	26.878	26.9041	21.3092	Elongation factor G-1, mitochondrial (Precursor) GN=MEFG1 OS=Arabidopsis thaliana (Mouse-ear cress) PE=2 SV=1	hypothetical protein JCGZ_25771 [Jatropha curcas]
	VF20133	2543	74.2746	57.2664	42.8139	47.2375	53.6322	36.3176	#N/A	#N/A
	VF11621	2542	6.53657	4.81822	3.55332	4.62975	2.5361	3.46299	NAC domain-containing protein 69 GN=F11O4.5 OS=Arabidopsis thaliana (Mouse-ear cress) PE=2 SV=1	NAC transcription factor 068 [Jatropha curcas]
	VF16780	2542	35.5352	18.6552	17.3315	32.708	22.0901	18.1466	Glucose-6-phosphate/phosphate translocator 2, chloroplastic (Precursor) GN=GPT2 OS=Arabidopsis thaliana (Mouse-ear cress) PE=2 SV=2	hypothetical protein JCGZ_21250 [Jatropha curcas]
	VF23671	2542	83.6856	115.31	131.703	95.901	136.273	129.189	BES1/BZR1 homolog protein 2 GN=BEH2 OS=Arabidopsis thaliana (Mouse-ear cress) PE=1 SV=1	hypothetical protein POPTR_0007s12370g [Populus trichocarpa]
	VF09218	2541	1.3371	36.8651	40.7917	12.4823	27.6636	33.0369	Protein RALF-like 33 (Precursor) OS=Arabidopsis thaliana (Mouse-ear cress) PE=2 SV=1	hypothetical protein JCGZ_18872 [Jatropha curcas]
	VF11256	2541	26.6563	18.8486	23.1715	23.5637	20.4347	19.0084	Glycine--tRNA ligase 2, chloroplastic/mitochondrial (Precursor) GN=T17F15.20 OS=Arabidopsis thaliana (Mouse-ear cress) PE=2 SV=1	hypothetical protein JCGZ_14636 [Jatropha curcas]
	VF22477	2541	4.62526	2.38379	3.34087	3.07599	3.34662	2.63491	Probable LRR receptor-like serine/threonine-protein kinase At5g48740 (Precursor) GN=At5g48740 OS=Arabidopsis thaliana (Mouse-ear cress) PE=2 SV=1	kinase, putative [Ricinus communis]
	VF08015	2540	70.9442	33.8873	52.9655	46.7894	40.397	38.3427	Peroxisomal membrane protein PMP22 GN=PMP22 OS=Arabidopsis thaliana (Mouse-ear cress) PE=1 SV=1	hypothetical protein JCGZ_16305 [Jatropha curcas]
	VFNG1495	2539	5.20302	3.54596	4.20782	3.66289	3.90903	2.95033	Zinc finger CCCH domain-containing protein 46 GN=At3g51950 OS=Arabidopsis thaliana (Mouse-ear cress) PE=1 SV=1	Zinc finger family protein / RNA recognition motif-containing protein isoform 1 [Theobroma cacao]
	VF16012	2539	30.4378	24.7065	22.3496	24.7778	20.3371	23.4382	Phosphoglycerate mutase-like protein AT74 {ECO:0000305} OS=Arabidopsis thaliana (Mouse-ear cress) PE=2 SV=1	hypothetical protein JCGZ_23392 [Jatropha curcas]
	VF02268	2538	607.068	353.626	347.583	259.714	230.667	182.8	#N/A	#N/A
	VF23839	2538	6.72395	3.88696	4.53048	6.17927	4.8901	3.76345	E3 ubiquitin-protein ligase AIP2 GN=AIP2 OS=Arabidopsis thaliana (Mouse-ear cress) PE=1 SV=1	conserved hypothetical protein [Ricinus communis]
	VF15412	2537	37.825	51.9809	55.0855	40.9266	56.0346	54.4479	3-hydroxyacyl-CoA dehydrogenase GN=AIM1 OS=Arabidopsis thaliana (Mouse-ear cress) PE=1 SV=1	3-hydroxyacyl-CoA dehyrogenase, putative [Ricinus communis]
	VF27540	2537	16.3697	21.3519	23.8741	22.102	27.7194	29.2697	Clavaminate synthase-like protein At3g21360 GN=At3g21360 OS=Arabidopsis thaliana (Mouse-ear cress) PE=1 SV=1	hypothetical protein JCGZ_24856 [Jatropha curcas]
	VF02999	2537	60.1253	25.8318	29.2017	36.1432	30.9435	35.223	E3 ubiquitin-protein ligase BRE1-like 2 GN=F7A10.17 OS=Arabidopsis thaliana (Mouse-ear cress) PE=2 SV=2	hypothetical protein JCGZ_19211 [Jatropha curcas]
	VF17192	2536	57.6309	35.4504	40.9833	50.7835	44.8608	38.7077	--	hypothetical protein JCGZ_26199 [Jatropha curcas]
	VFNG85	2536	3.65887	2.3873	2.21135	2.21665	1.89552	2.23391	--	hypothetical protein JCGZ_01332 [Jatropha curcas]
	VF00461	2535	16.2673	14.3557	12.801	14.6687	11.9227	10.5821	--	hypothetical protein JCGZ_12549 [Jatropha curcas]
	VF08586	2534	49.7186	33.4815	32.1488	47.7721	37.5147	26.9682	Regulatory protein NPR3 GN=NPR3 OS=Arabidopsis thaliana (Mouse-ear cress) PE=1 SV=1	hypothetical protein JCGZ_02854 [Jatropha curcas]
	VF04396	2534	2.51881	3.67049	3.7033	3.9196	4.01423	3.93255	IAA-amino acid hydrolase ILR1 (Precursor) GN=ILR1 OS=Arabidopsis thaliana (Mouse-ear cress) PE=1 SV=2	Iaa-amino acid hydrolase 4, putative [Theobroma cacao]
	VF19201	2534	15.4956	9.57561	7.37659	11.1167	8.96922	10.1865	--	hypothetical protein JCGZ_16158 [Jatropha curcas]
	VF27672	2533	4.34832	7.91617	7.49146	6.19684	8.82292	7.43887	--	hypothetical protein JCGZ_17751 [Jatropha curcas]
	VF02239	2533	13.4956	1.01475	2.80352	0.627192	0.0661785	0.815088	--	hypothetical protein JCGZ_20850 [Jatropha curcas]
	VF12722	2532	59.2328	31.9701	26.9927	51.7767	39.6539	31.7395	Probable complex I intermediate-associated protein 30 GN=At1g17350 OS=Arabidopsis thaliana (Mouse-ear cress) PE=1 SV=2	hypothetical protein JCGZ_24655 [Jatropha curcas]
	VFNG3623	2532	8.42394	30.1398	26.819	18.5758	27.6071	23.6896	50S ribosomal protein L19-1, chloroplastic (Precursor) GN=At4g17560 OS=Arabidopsis thaliana (Mouse-ear cress) PE=2 SV=1	hypothetical protein JCGZ_03470 [Jatropha curcas]
	VF13520	2532	6.96268	0.00023307	0.00315202	0.233798	0.404049	0.583847	Cyclin-dependent kinase E-1 GN=MBK5.8 OS=Arabidopsis thaliana (Mouse-ear cress) PE=1 SV=2	hypothetical protein JCGZ_20418 [Jatropha curcas]
	VFNG4583	2531	3.83384	1.66019	2.23604	3.35134	2.22596	1.95102	Endonuclease OS=Nicotiana tabacum (Common tobacco) PE=2 SV=1	PREDICTED: uncharacterized mitochondrial protein AtMg00810-like, partial [Cucumis sativus]
	VF23995	2530	15.1838	11.4038	11.4921	10.5327	10.3678	10.3925	Probable isoprenylcysteine alpha-carbonyl methylesterase ICMEL1 OS=Arabidopsis thaliana (Mouse-ear cress) PE=2 SV=1	catalytic, putative [Ricinus communis]
	VF12424	2529	62.7048	34.064	33.7442	36.0483	35.2366	37.5293	--	hypothetical protein JCGZ_17411 [Jatropha curcas]
	VF19407	2529	10.8987	4.22732	4.18712	5.27279	5.26028	5.48036	--	hypothetical protein JCGZ_21989 [Jatropha curcas]
	VF23486	2528	61.1326	48.0325	54.4946	55.9567	47.7499	43.3718	Fructose-2,6-bisphosphatase GN=F10K1.19 OS=Arabidopsis thaliana (Mouse-ear cress) PE=1 SV=1	hypothetical protein JCGZ_17394 [Jatropha curcas]
	VF10362	2527	6.74639	29.3713	25.4678	29.831	21.1298	33.1765	--	BnaC09g40680D [Brassica napus]
	VF18346	2527	4.38527	3.32068	1.48352	2.55512	1.52013	1.44405	Glucan endo-1,3-beta-glucosidase 14 (Precursor) GN=At2g27500 OS=Arabidopsis thaliana (Mouse-ear cress) PE=1 SV=2	PREDICTED: glucan endo-1,3-beta-glucosidase 14-like [Populus euphratica]
	VF19611	2527	23.6915	15.2965	14.9155	20.6974	14.6592	16.7648	Putative glycerol-3-phosphate transporter 5 GN=At2g13100 OS=Arabidopsis thaliana (Mouse-ear cress) PE=2 SV=2	hypothetical protein JCGZ_16967 [Jatropha curcas]
	VF28262	2527	19.2525	37.6067	44.6329	26.0683	36.5709	37.8461	Protein argonaute 5 GN=AGO5 OS=Arabidopsis thaliana (Mouse-ear cress) PE=1 SV=2	eukaryotic translation initiation factor 2c, putative [Ricinus communis]
	VF24885	2527	201.519	424.462	443.474	480.078	530.714	495.041	NADH dehydrogenase [ubiquinone] 1 beta subcomplex subunit 8, mitochondrial (Precursor) GN=At5g47570 OS=Arabidopsis thaliana (Mouse-ear cress) PE=2 SV=1	PREDICTED: NADH dehydrogenase [ubiquinone] 1 beta subcomplex subunit 8, mitochondrial isoform X1 [Nelumbo nucifera]
	VF25063	2526	5.29996e-19	74.3315	195.324	95.9183	112.933	173.635	--	hypothetical protein JCGZ_26435 [Jatropha curcas]
	VF28314	2526	289.168	985.214	1093.74	874.079	922.559	867.317	40S ribosomal protein S16 GN=RPS16 OS=Gossypium hirsutum (Upland cotton) PE=2 SV=1	hypothetical protein JCGZ_00289 [Jatropha curcas]
	VF05041	2525	43.63	98.0899	109.09	66.3488	126.251	105.419	Enolase 1, chloroplastic (Precursor) GN=ENO1 OS=Arabidopsis thaliana (Mouse-ear cress) PE=1 SV=1	JHL10I11.2 [Jatropha curcas]
	VF26330	2524	8.10073	6.20805	4.36919	7.25845	5.83202	4.5802	Chaperone protein dnaJ 6 GN=MOJ9.8 OS=Arabidopsis thaliana (Mouse-ear cress) PE=2 SV=1	hypothetical protein JCGZ_11719 [Jatropha curcas]
	VF09879	2523	32.4059	20.8635	22.6037	24.5582	21.3927	23.9707	Septin and tuftelin-interacting protein 1 homolog 2 GN=STIPL2 OS=Arabidopsis thaliana (Mouse-ear cress) PE=2 SV=1	hypothetical protein POPTR_0005s00450g [Populus trichocarpa]
	VF12632	2523	18.0033	49.007	38.0291	42.8325	51.7454	46.6099	--	conserved hypothetical protein [Ricinus communis]
	VF11103	2522	17.5188	14.0616	14.2354	14.7943	11.439	10.2972	Nijmegen breakage syndrome 1 protein {ECO:0000303|PubMed:17182003} OS=Arabidopsis thaliana (Mouse-ear cress) PE=1 SV=1	hypothetical protein JCGZ_21011 [Jatropha curcas]
	VF07292	2520	18.3828	14.8493	14.3203	17.416	15.7572	15.0454	Putative nitric oxide synthase OS=Oryza sativa subsp. japonica (Rice) PE=3 SV=1	hypothetical protein JCGZ_03254 [Jatropha curcas]
	VF23065	2520	26.1392	18.0414	18.7293	22.7088	20.8438	20.2209	--	hypothetical protein JCGZ_09714 [Jatropha curcas]
	VF03923	2520	14.259	46.1999	48.0595	59.3105	55.8306	62.3582	Ribosomal protein S14, mitochondrial GN=RPS14 OS=Oenothera berteroana (Bertero&apos;s evening primrose) PE=3 SV=2	hypothetical protein JCGZ_00857 [Jatropha curcas]
	VF11236	2519	21.8173	33.5625	34.706	28.5993	34.1135	30.7681	Trihelix transcription factor ASIL2 {ECO:0000305} OS=Arabidopsis thaliana (Mouse-ear cress) PE=2 SV=1	hypothetical protein JCGZ_14655 [Jatropha curcas]
	VF24638	2519	7.09741	12.6334	11.7443	9.36	9.78757	12.1676	--	unnamed protein product [Coffea canephora]
	VF02645	2518	17.861	15.1711	14.0781	14.1595	12.4256	11.1379	--	hypothetical protein JCGZ_21667 [Jatropha curcas]
	VF17746	2518	6.71278	2.99404	2.21367	3.29047	2.84722	3.43714	--	hypothetical protein JCGZ_04428 [Jatropha curcas]
	VF02188	2517	5.71761	11.0428	14.993	12.9669	10.7092	14.1859	50S ribosomal protein L11, chloroplastic (Precursor) GN=RPL11 OS=Arabidopsis thaliana (Mouse-ear cress) PE=2 SV=1	50S robosomal protein L11, putative [Ricinus communis]
	VF18025	2517	13.6303	9.58837	10.0674	12.8595	11.234	8.98229	Flowering time control protein FPA GN=FPA OS=Arabidopsis thaliana (Mouse-ear cress) PE=2 SV=2	hypothetical protein JCGZ_16038 [Jatropha curcas]
	VF22324	2517	5.25403	0.0108687	8.01884e-05	0.0492197	1.4176	0.00137153	Protein EXORDIUM-like 2 (Precursor) GN=EXL2 OS=Arabidopsis thaliana (Mouse-ear cress) PE=2 SV=1	hypothetical protein JCGZ_24914 [Jatropha curcas]
	VFNG1447	2517	3.10149	4.99338	4.73388	4.02151	4.09218	4.63105	--	hypothetical protein JCGZ_25635 [Jatropha curcas]
	VF12514	2517	235.124	394.159	452.756	486.268	448.482	501.852	--	hypothetical protein JCGZ_18769 [Jatropha curcas]
	VF14883	2516	12.0059	8.36855	7.38891	8.695	6.67797	8.34694	Receptor-like protein kinase FERONIA (Precursor) GN=F26O13.190 OS=Arabidopsis thaliana (Mouse-ear cress) PE=1 SV=1	kinase, putative [Ricinus communis]
	VF13687	2515	26.8871	20.2567	19.1415	20.4027	19.6494	11.3807	--	hypothetical protein JCGZ_17866 [Jatropha curcas]
	VF23246	2515	15.2078	8.90187	10.3128	8.3736	10.7368	7.27413	--	hypothetical protein JCGZ_20850 [Jatropha curcas]
	VFNG1732	2515	44.1827	22.9039	27.2566	30.1316	28.4576	29.1187	--	PREDICTED: uncharacterized protein LOC102627687 [Citrus sinensis]
	VF17552	2515	77.3845	38.5041	41.9152	51.9898	42.7085	50.0692	--	hypothetical protein JCGZ_14026 [Jatropha curcas]
	VF17770	2514	56.5029	44.4228	42.5153	52.8292	49.5454	39.1385	COP9 signalosome complex subunit 4 GN=MBD2.17 OS=Arabidopsis thaliana (Mouse-ear cress) PE=1 SV=2	cop9 complex subunit, putative [Ricinus communis]
	VF09502	2513	13.9785	7.53233	8.67413	7.72834	7.95613	7.82404	Protein kinase APK1B, chloroplastic (Precursor) GN=APK1B OS=Arabidopsis thaliana (Mouse-ear cress) PE=2 SV=2	serine/threonine-protein kinase cx32, putative [Ricinus communis]
	VF15506	2513	12.9866	17.1969	18.008	14.8255	18.6872	17.0898	--	Uncharacterized protein isoform 2 [Theobroma cacao]
	VF01324	2512	8.40009	6.90045	4.3848	6.54043	5.79141	4.10101	Chorismate mutase 3, chloroplastic (Precursor) GN=CM3 OS=Arabidopsis thaliana (Mouse-ear cress) PE=1 SV=1	hypothetical protein JCGZ_15667 [Jatropha curcas]
	VF21677	2512	2.58094	1.74684	1.7944	2.15012	1.52055	1.86471	Wall-associated receptor kinase 2 (Precursor) GN=WAK2 OS=Arabidopsis thaliana (Mouse-ear cress) PE=1 SV=1	WAK-like protein, partial [Platanus x acerifolia]
	VF04367	2510	4.92452	14.0055	11.9695	7.0049	10.1165	15.5684	--	hypothetical protein JCGZ_06788 [Jatropha curcas]
	VF03500	2509	50.4989	36.6834	35.6539	42.8906	41.5703	39.7012	Casein kinase I isoform delta-like GN=At4g26100 OS=Arabidopsis thaliana (Mouse-ear cress) PE=2 SV=2	casein kinase, putative [Ricinus communis]
	VF10862	2509	8.21671	1.16084	0.576879	6.44043	1.15016	1.92655	Dehydrodolichyl diphosphate synthase 2 GN=At5g58770 OS=Arabidopsis thaliana (Mouse-ear cress) PE=2 SV=2	hypothetical protein JCGZ_08475 [Jatropha curcas]
	VF15041	2508	9.98904	24.2207	21.6055	13.5053	18.9486	30.6771	Acetylornithine aminotransferase, mitochondrial (Precursor) GN=AG118 OS=Alnus glutinosa (European alder) PE=2 SV=1	hypothetical protein JCGZ_06068 [Jatropha curcas]
	VF22179	2508	87.401	62.3289	61.1949	78.8189	65.8087	67.9633	Phosphoglucomutase, chloroplastic (Precursor) GN=PGMP OS=Solanum tuberosum (Potato) PE=2 SV=1	PREDICTED: phosphoglucomutase, chloroplastic-like [Cicer arietinum]
	VF17127	2507	22.6573	14.4453	17.882	16.8057	12.7542	14.4486	B3 domain-containing transcription factor VRN1 GN=VRN1 OS=Arabidopsis thaliana (Mouse-ear cress) PE=1 SV=1	hypothetical protein JCGZ_18412 [Jatropha curcas]
	VF13413	2506	14.632	32.7025	30.9554	17.9288	38.0467	36.9355	L-galactose dehydrogenase GN=LGALDH OS=Arabidopsis thaliana (Mouse-ear cress) PE=1 SV=1	hypothetical protein JCGZ_09891 [Jatropha curcas]
	VF14969	2506	363.006	292.891	305.922	321.623	250.459	226.998	H/ACA ribonucleoprotein complex subunit 2-like protein GN=At5g08180 OS=Arabidopsis thaliana (Mouse-ear cress) PE=1 SV=1	hypothetical protein JCGZ_13316 [Jatropha curcas]
	VF15541	2506	85.1888	113.586	128.11	110.366	107.351	116.47	Serine acetyltransferase 5 GN=MIK19.23 OS=Arabidopsis thaliana (Mouse-ear cress) PE=1 SV=1	serine acetyltransferase [Hevea brasiliensis]
	VF28275	2506	5.73066	4.52456	3.8743	4.6649	4.38772	4.54026	--	conserved hypothetical protein [Ricinus communis]
	VF10253	2505	2.03746	13.72	9.08506	7.84751	7.61552	12.6021	--	hypothetical protein JCGZ_13014 [Jatropha curcas]
	VF07590	2504	3.3795	2.39181	1.25008	2.78303	1.4287	1.47711	#N/A	#N/A
	VF09263	2504	7.18969	22.8394	27.474	10.537	20.8545	24.3597	2-methylacyl-CoA dehydrogenase, mitochondrial (Precursor) GN=2MBCD OS=Solanum tuberosum (Potato) PE=1 SV=2	hypothetical protein JCGZ_18915 [Jatropha curcas]
	VF16690	2504	94.0426	125.467	141.23	116.754	115.986	130.339	--	hypothetical protein JCGZ_19366 [Jatropha curcas]
	VF16981	2504	1441.36	936.894	427.551	1017.41	754.808	753.79	Auxin-repressed 12.5 kDa protein OS=Fragaria ananassa (Strawberry) PE=2 SV=1	auxin-repressed protein-like protein ARP1 [Manihot esculenta]
	VF17810	2504	14.5274	20.3937	21.7248	18.539	23.3518	20.3198	--	hypothetical protein JCGZ_04369 [Jatropha curcas]
	VF27214	2504	16.3069	15.3089	14.7728	15.1127	14.9013	13.5639	--	hypothetical protein JCGZ_25944 [Jatropha curcas]
	VF03022	2503	14.4426	17.7328	20.362	20.3696	19.4517	21.4591	#N/A	#N/A
	VF05082	2503	20.093	9.78736	10.7073	14.6831	9.97853	12.7939	Galactinol--sucrose galactosyltransferase GN=RFS OS=Pisum sativum (Garden pea) PE=1 SV=1	hypothetical protein JCGZ_11430 [Jatropha curcas]
	VF16951	2503	29.7689	35.3039	40.36	39.6716	40.4364	44.6357	Vesicle-fusing ATPase GN=NSF OS=Arabidopsis thaliana (Mouse-ear cress) PE=2 SV=2	hypothetical protein JCGZ_21445 [Jatropha curcas]
	VF00464	2502	46.1081	31.2928	31.275	42.2808	36.8675	32.5984	--	hypothetical protein JCGZ_07697 [Jatropha curcas]
	VF26504	2501	30.8318	34.6654	38.5407	35.3509	38.9877	43.3774	Chaperone protein dnaJ 15 GN=T2E12.8 OS=Arabidopsis thaliana (Mouse-ear cress) PE=1 SV=1	hypothetical protein JCGZ_18363 [Jatropha curcas]
	VF05011	2500	48.1913	28.5449	28.8197	44.2412	32.5579	30.8054	Transcription initiation factor TFIID subunit 2 GN=TAF2 OS=Arabidopsis thaliana (Mouse-ear cress) PE=2 SV=1	PREDICTED: transcription initiation factor TFIID subunit 2 isoform X1 [Populus euphratica]
	VF06354	2500	3.4912	0.0344238	0	3.05239	0.286949	0	B3 domain-containing protein At2g33720 GN=At2g33720 OS=Arabidopsis thaliana (Mouse-ear cress) PE=2 SV=1	hypothetical protein POPTR_0004s09870g [Populus trichocarpa]
	VF21534	2500	122.032	232.882	184.375	175.566	200.322	202.814	Plastocyanin A, chloroplastic (Precursor) GN=PETE OS=Populus nigra (Lombardy poplar) PE=1 SV=2	hypothetical protein JCGZ_08159 [Jatropha curcas]
	VF25587	2500	73.6565	59.2888	64.0634	61.2471	60.4814	49.317	--	hypothetical protein JCGZ_23954 [Jatropha curcas]
	VF15679	2499	18.1175	8.28618	6.91819	16.84	8.32228	7.4837	Adrenodoxin-like protein 2, mitochondrial {ECO:0000303|PubMed:12714594} (Precursor) OS=Arabidopsis thaliana (Mouse-ear cress) PE=2 SV=1	hypothetical protein JCGZ_01517 [Jatropha curcas]
	VF16901	2499	16.9581	12.4579	10.3029	14.7696	11.8327	12.4357	Probable mediator of RNA polymerase II transcription subunit 26b GN=K2A11.1 OS=Arabidopsis thaliana (Mouse-ear cress) PE=2 SV=1	hypothetical protein JCGZ_06337 [Jatropha curcas]
	VF19541	2498	15.7854	10.7695	9.93759	12.7917	11.8389	11.9255	Probable protein phosphatase 2C 51 GN=At3g63340 OS=Arabidopsis thaliana (Mouse-ear cress) PE=2 SV=2	PREDICTED: uncharacterized protein LOC105131392 [Populus euphratica]
	VFNG1739	2497	0.360628	1.26838	1.51231	0.536257	1.00676	1.70303	Protein trichome birefringence-like 19 GN=TBL19 OS=Arabidopsis thaliana (Mouse-ear cress) PE=3 SV=1	hypothetical protein JCGZ_25655 [Jatropha curcas]
	VF24769	2497	11.936	18.9602	22.3543	22.3135	19.8303	22.4228	--	hypothetical protein JCGZ_18043 [Jatropha curcas]
	VF03805	2496	10.9855	23.2532	18.1818	17.403	18.8335	19.8581	--	hypothetical protein JCGZ_00656 [Jatropha curcas]
	VF05885	2496	49.8046	41.4887	26.169	34.9274	32.8703	27.9844	Zinc finger protein CONSTANS-LIKE 7 GN=COL7 OS=Arabidopsis thaliana (Mouse-ear cress) PE=2 SV=1	hypothetical protein JCGZ_10206 [Jatropha curcas]
	VF06702	2496	5.20411	3.25214	1.96628	1.98142	0.942935	0.912108	Anthocyanidin 3-O-glucosyltransferase 1 GN=GT1 OS=Manihot esculenta (Cassava) PE=2 SV=1	hypothetical protein JCGZ_05002 [Jatropha curcas]
	VF23578	2496	2.19393	5.36793	7.60544	6.51648	10.1501	10.3941	#N/A	#N/A
	VF25360	2496	16.5271	14.1384	11.5699	14.2876	10.0656	10.8983	Serine/threonine-protein kinase HT1 GN=HT1 OS=Arabidopsis thaliana (Mouse-ear cress) PE=1 SV=1	hypothetical protein JCGZ_10244 [Jatropha curcas]
	VF21539	2494	4.52188	2.79984	2.29993	2.30779	0.91966	0.614125	F-box protein At2g17036 GN=At2g17036 OS=Arabidopsis thaliana (Mouse-ear cress) PE=2 SV=1	conserved hypothetical protein [Ricinus communis]
	VF23758	2494	2.47816	1.55792	0.836549	2.17472	0.763563	0.667346	--	hypothetical protein JCGZ_22703 [Jatropha curcas]
	VF01813	2492	58.3543	42.7211	45.7181	46.7708	48.0924	46.3201	--	hypothetical protein JCGZ_25887 [Jatropha curcas]
	VFNG2574	2492	13.8946	6.23931	7.52374	4.94126	4.69946	4.39703	#N/A	#N/A
	VF06965	2492	129.157	77.1212	76.4358	61.8907	58.9285	59.8458	Probable gamma-secretase subunit PEN-2 GN=At5g09310 OS=Arabidopsis thaliana (Mouse-ear cress) PE=2 SV=1	hypothetical protein JCGZ_00809 [Jatropha curcas]
	VF13632	2492	197.283	361.897	425.621	385.896	453.74	389.723	Peptidyl-prolyl cis-trans isomerase FKBP12 GN=MSJ1.19 OS=Arabidopsis thaliana (Mouse-ear cress) PE=1 SV=2	immunophilin, putative [Ricinus communis]
	VF16286	2492	7.15824	4.60084	3.19494	5.47963	4.36193	4.65316	--	hypothetical protein JCGZ_02731 [Jatropha curcas]
	VF18058	2491	42.8395	63.5	65.996	61.6321	55.1467	63.8228	Dynein assembly factor with WDR repeat domains 1 GN=DAW1 OS=Chlamydomonas reinhardtii (Chlamydomonas smithii) PE=1 SV=1	hypothetical protein JCGZ_00091 [Jatropha curcas]
	VF23889	2491	11.1902	15.6141	16.0569	12.1441	13.877	17.321	Protein root UVB sensitive 3 {ECO:0000303|PubMed:19515790} OS=Arabidopsis thaliana (Mouse-ear cress) PE=2 SV=1	conserved hypothetical protein [Ricinus communis]
	VF24761	2491	21.0426	0.192488	0.0173191	18.5246	2.9429	0.0457817	Aspartic proteinase-like protein 2 (Precursor) GN=At1g65240 OS=Arabidopsis thaliana (Mouse-ear cress) PE=1 SV=2	Aspartic proteinase Asp1 precursor, putative [Ricinus communis]
	VF04969	2491	95.3965	59.7475	64.8471	60.3367	58.5228	61.6725	Phosphatidate cytidylyltransferase GN=CDS1 OS=Arabidopsis thaliana (Mouse-ear cress) PE=1 SV=1	hypothetical protein JCGZ_21145 [Jatropha curcas]
	VF17454	2490	23.599	18.1111	18.5412	23.1502	19.5842	16.9477	--	PREDICTED: uncharacterized protein LOC105140796 isoform X1 [Populus euphratica]
	VF22932	2490	85.8117	60.6375	64.0507	84.2647	60.6097	55.1026	DEAD-box ATP-dependent RNA helicase 5 GN=RH5 OS=Arabidopsis thaliana (Mouse-ear cress) PE=1 SV=1	hypothetical protein JCGZ_03849 [Jatropha curcas]
	VF15476	2489	47.2317	110.545	127.078	137.129	129.029	134.743	Mitochondrial import inner membrane translocase subunit TIM17-1 OS=Arabidopsis thaliana (Mouse-ear cress) PE=2 SV=1	hypothetical protein JCGZ_07366 [Jatropha curcas]
	VFNG709	2488	2.41712	0.988493	1.14448	1.45237	0.969251	1.37315	--	PREDICTED: uncharacterized protein LOC101262755 [Solanum lycopersicum]
	VFNG3884	2487	8.07659	10.522	13.5619	9.8329	14.1406	13.6509	Transcription factor GTE12 GN=GTE12 OS=Arabidopsis thaliana (Mouse-ear cress) PE=2 SV=2	hypothetical protein JCGZ_00234 [Jatropha curcas]
	VF06039	2487	14.7209	11.4116	11.6045	12.0237	11.0534	12.0416	--	hypothetical protein JCGZ_23928 [Jatropha curcas]
	VF18668	2486	17.5303	31.263	37.9128	23.8007	43.4556	54.2018	Protein RER1A GN=RER1A OS=Arabidopsis thaliana (Mouse-ear cress) PE=1 SV=1	hypothetical protein JCGZ_12449 [Jatropha curcas]
	VF21826	2486	26.6325	47.4941	49.7907	37.9553	49.7198	42.7109	--	acetyltransferase complex ard1 subunit, putative [Ricinus communis]
	VF09591	2485	50.2816	68.8982	75.7437	66.9044	66.8813	67.4096	Uncharacterized protein At3g15000, mitochondrial GN=At3g15000 OS=Arabidopsis thaliana (Mouse-ear cress) PE=1 SV=1	hypothetical protein JCGZ_09835 [Jatropha curcas]
	VF21331	2484	30.8774	23.3958	23.1775	23.7463	16.4432	14.9204	Probable protein phosphatase 2C 35 GN=At3g06270 OS=Arabidopsis thaliana (Mouse-ear cress) PE=2 SV=1	hypothetical protein JCGZ_02064 [Jatropha curcas]
	VF22260	2484	33.2577	26.8706	19.1848	26.6404	16.1947	12.8968	Ras-related protein RABA5e (Precursor) GN=T20M3.8 OS=Arabidopsis thaliana (Mouse-ear cress) PE=2 SV=1	hypothetical protein JCGZ_15126 [Jatropha curcas]
	VF21234	2483	221.401	182.64	180.023	172.309	192.2	166.81	Proteasome subunit beta type-3-A GN=F8K7.15 OS=Arabidopsis thaliana (Mouse-ear cress) PE=1 SV=2	hypothetical protein JCGZ_12128 [Jatropha curcas]
	VF08988	2483	37.3084	59.4369	66.4177	59.9451	55.8755	59.6989	--	hypothetical protein JCGZ_21331 [Jatropha curcas]
	VF11264	2483	24.3328	33.6214	39.3376	38.5531	42.5753	40.2774	--	hypothetical protein JCGZ_14628 [Jatropha curcas]
	VF17518	2483	33.8658	21.1789	22.5807	22.1218	21.5516	22.7435	Cell division control protein 48 homolog B GN=CDC48B OS=Arabidopsis thaliana (Mouse-ear cress) PE=2 SV=1	hypothetical protein JCGZ_23815 [Jatropha curcas]
	VF21132	2482	13.1187	11.9234	10.8117	11.5188	9.98374	10.4485	--	hypothetical protein JCGZ_18281 [Jatropha curcas]
	VF21717	2480	23.3419	35.3447	30.6849	33.1909	31.8194	34.3269	Protein FLX-like 1 GN=MIE1.26 OS=Arabidopsis thaliana (Mouse-ear cress) PE=1 SV=1	conserved hypothetical protein [Ricinus communis]
	VF14887	2480	8.23058	4.93465	4.74455	4.94764	3.78683	4.97977	Receptor-like protein kinase FERONIA (Precursor) GN=F26O13.190 OS=Arabidopsis thaliana (Mouse-ear cress) PE=1 SV=1	Malectin/receptor-like protein kinase family protein, putative [Theobroma cacao]
	VF06846	2479	122.813	170.52	225.652	186.763	208.858	278.181	GTP-binding protein YPTM2 GN=YPTM2 OS=Zea mays (Maize) PE=2 SV=1	protein with unknown function [Ricinus communis]
	VF09589	2479	3.41666	6.59722	6.80788	7.12129	5.36755	7.82451	Putative RING-H2 finger protein ATL21A (Precursor) GN=ATL21A OS=Arabidopsis thaliana (Mouse-ear cress) PE=3 SV=1	receptor serine/threonine kinase, putative [Ricinus communis]
	VF12164	2479	35.8845	84.7879	62.9667	53.8365	65.7327	94.6184	GDP-mannose 4,6 dehydratase 2 GN=F24M12.200 OS=Arabidopsis thaliana (Mouse-ear cress) PE=1 SV=3	hypothetical protein JCGZ_06504 [Jatropha curcas]
	VF24068	2479	19.1781	13.7275	16.3041	17.1778	12.6629	12.6438	--	hypothetical protein JCGZ_09287 [Jatropha curcas]
	VFNG3963	2477	39.5998	28.2095	28.8044	28.3419	18.8647	16.7611	Transcriptional corepressor SEUSS GN=SEU OS=Arabidopsis thaliana (Mouse-ear cress) PE=1 SV=1	hypothetical protein JCGZ_25251 [Jatropha curcas]
	VF21799	2477	10.9957	1.17279	1.63925	1.51776	0	1.96737	Anthocyanidin 5,3-O-glucosyltransferase GN=RhGT1 OS=Rosa hybrid cultivar PE=2 SV=1	hypothetical protein JCGZ_16903 [Jatropha curcas]
	VF11707	2475	8.97442	14.8403	13.9688	9.72942	13.9393	14.5243	--	conserved hypothetical protein [Ricinus communis]
	VF13636	2475	26.7531	49.8895	49.928	30.0185	41.5253	57.7684	Non-functional NADPH-dependent codeinone reductase 2 GN=COR2 OS=Papaver somniferum (Opium poppy) PE=1 SV=1	hypothetical protein JCGZ_17857 [Jatropha curcas]
	VF18660	2475	7.82266	11.9992	14.0106	10.251	14.2154	12.3105	--	hypothetical protein JCGZ_12457 [Jatropha curcas]
	VFNG2684	2474	24.4778	19.2037	16.9867	19.8338	16.3931	9.6426	Uncharacterized mitochondrial protein AtMg00310 GN=AtMg00310 OS=Arabidopsis thaliana (Mouse-ear cress) PE=4 SV=1	hypothetical protein PRUPE_ppa020282mg [Prunus persica]
	VF12278	2473	23.0311	17.0261	17.3127	18.4988	18.8691	18.451	Importin beta-like SAD2 homolog {ECO:0000305} OS=Arabidopsis thaliana (Mouse-ear cress) PE=1 SV=1	hypothetical protein JCGZ_00452 [Jatropha curcas]
	VF21414	2473	22.2751	16.2293	14.9007	16.2118	13.4873	16.076	Peroxisomal adenine nucleotide carrier 1 GN=PNC1 OS=Arabidopsis thaliana (Mouse-ear cress) PE=1 SV=1	hypothetical protein JCGZ_02134 [Jatropha curcas]
	VF03807	2472	2.19778	8.27847	6.89166	3.37407	6.2529	7.49932	--	hypothetical protein JCGZ_00654 [Jatropha curcas]
	VF05301	2472	7.59528	5.15984	5.06828	6.99357	6.19237	4.00703	#N/A	#N/A
	VF21321	2472	12.7526	19.1419	18.5605	13.464	16.9161	20.5636	Uncharacterized protein At4g15545 GN=At4g15545 OS=Arabidopsis thaliana (Mouse-ear cress) PE=1 SV=1	hypothetical protein JCGZ_02054 [Jatropha curcas]
	VF25647	2472	1.04708e-15	7.20834	8.13273	3.27461	6.10112	5.42061	Cation/calcium exchanger 2 OS=Arabidopsis thaliana (Mouse-ear cress) PE=3 SV=1	hypothetical protein JCGZ_02662 [Jatropha curcas]
	VF06219	2470	57.8992	40.2299	41.3112	47.8901	48.0665	44.5542	--	hypothetical protein JCGZ_14365 [Jatropha curcas]
	VF24725	2470	22.0273	15.6931	15.3399	21.6109	17.1806	13.1538	--	hypothetical protein JCGZ_18007 [Jatropha curcas]
	VF09999	2470	4.53542	2.34005	2.21562	2.73332	1.74609	2.65441	NAC domain-containing protein 4 GN=NAC004 OS=Arabidopsis thaliana (Mouse-ear cress) PE=2 SV=2	hypothetical protein JCGZ_02834 [Jatropha curcas]
	VF02247	2468	16.3531	13.6338	13.1823	14.1821	13.8618	10.1431	Ultraviolet-B receptor UVR8 GN=UVR8 OS=Arabidopsis thaliana (Mouse-ear cress) PE=1 SV=1	hypothetical protein JCGZ_06516 [Jatropha curcas]
	VF20572	2468	2.56055	1.58549	1.91628	1.59657	1.72655	1.52194	--	VQ motif-containing family protein [Populus trichocarpa]
	VF24467	2468	35.7478	17.5501	15.6433	25.6735	24.4608	21.1692	Perakine reductase GN=PR OS=Rauvolfia serpentina (Serpentine wood) PE=1 SV=1	aldo/keto reductase, putative [Ricinus communis]
	VF04825	2467	52.3021	41.4195	41.6098	38.6727	33.7309	32.115	Protein XRI1 GN=XRI1 OS=Arabidopsis thaliana (Mouse-ear cress) PE=1 SV=2	hypothetical protein JCGZ_17534 [Jatropha curcas]
	VF22369	2467	29.0032	24.45	24.0637	24.4247	24.3728	18.8348	--	hypothetical protein JCGZ_06731 [Jatropha curcas]
	VF03216	2466	38.7375	28.3267	29.2311	29.1104	29.8166	29.7375	Syntaxin-32 GN=SYP32 OS=Arabidopsis thaliana (Mouse-ear cress) PE=2 SV=1	syntaxin, putative [Ricinus communis]
	VF04827	2465	45.6639	15.4866	8.51126	31.7902	24.9699	19.275	Small ubiquitin-related modifier 2 GN=MCO15.11 OS=Arabidopsis thaliana (Mouse-ear cress) PE=1 SV=1	hypothetical protein JCGZ_17532 [Jatropha curcas]
	VF13685	2465	1.92327	1.16657	1.18639	1.0734	0.724245	0.274586	Protein terminal ear1 GN=TE1 OS=Zea mays (Maize) PE=2 SV=1	hypothetical protein JCGZ_17868 [Jatropha curcas]
	VF17344	2463	67.8136	49.1737	52.7597	45.9187	45.3381	44.341	DEAD-box ATP-dependent RNA helicase 38 GN=T4D2.40 OS=Arabidopsis thaliana (Mouse-ear cress) PE=1 SV=2	hypothetical protein JCGZ_16594 [Jatropha curcas]
	VF18498	2463	21.3139	14.4531	10.8373	13.9831	15.8495	13.125	--	hypothetical protein JCGZ_19698 [Jatropha curcas]
	VF25104	2463	111.798	166.901	178.345	149.974	184.475	159.144	Proteasome subunit alpha type-4 GN=PAC1 OS=Spinacia oleracea (Spinach) PE=2 SV=1	hypothetical protein JCGZ_26393 [Jatropha curcas]
	VF04739	2462	17.9102	12.734	13.7807	15.1478	15.783	11.8639	Transcriptional activator DEMETER GN=T32M21.160/T32M21.170/T32M21.180 OS=Arabidopsis thaliana (Mouse-ear cress) PE=1 SV=2	hypothetical protein JCGZ_01528 [Jatropha curcas]
	VF08862	2462	74.239	46.3468	50.4262	40.4901	32.1974	25.6964	RING-H2 finger protein ATL52 GN=ATL52 OS=Arabidopsis thaliana (Mouse-ear cress) PE=2 SV=1	RING-H2 finger protein ATL2G precursor, putative [Ricinus communis]
	VF09805	2462	44.1224	33.6589	32.7301	43.1112	33.9711	32.9013	Transcription initiation factor TFIID subunit 7 GN=TAF7 OS=Arabidopsis thaliana (Mouse-ear cress) PE=1 SV=1	PREDICTED: transcription initiation factor TFIID subunit 7 isoform X1 [Tarenaya hassleriana]
	VF13718	2462	31.4382	20.7558	10.6403	19.4988	12.3258	17.107	--	hypothetical protein JCGZ_06356 [Jatropha curcas]
	VF09227	2461	7.43503	5.85558	4.88812	5.52728	6.36451	4.8356	--	hypothetical protein JCGZ_18882 [Jatropha curcas]
	VF15333	2461	33.6594	26.2715	25.145	31.9923	28.8015	26.2096	Vacuolar protein sorting-associated protein 36 GN=VPS36 OS=Arabidopsis thaliana (Mouse-ear cress) PE=1 SV=1	hypothetical protein JCGZ_03173 [Jatropha curcas]
	VF21116	2461	38.8758	29.3195	34.2912	31.5695	32.6827	28.5987	Mediator of RNA polymerase II transcription subunit 25 GN=F2J7.4 OS=Arabidopsis thaliana (Mouse-ear cress) PE=1 SV=1	hypothetical protein CICLE_v10030710mg [Citrus clementina]
	VF17040	2460	13.4925	9.69399	8.53578	12.4801	11.0827	7.90143	Transcription factor GTE4 GN=GTE4 OS=Arabidopsis thaliana (Mouse-ear cress) PE=2 SV=1	hypothetical protein JCGZ_14702 [Jatropha curcas]
	VF11245	2459	7.1597	6.18496	4.83383	5.71641	4.77351	3.71853	F-box/FBD/LRR-repeat protein At3g52680 GN=At3g52680 OS=Arabidopsis thaliana (Mouse-ear cress) PE=2 SV=2	hypothetical protein JCGZ_14646 [Jatropha curcas]
	VF14171	2459	67.5911	57.0251	57.719	64.0095	62.5478	53.9955	Protein PHR1-LIKE 1 GN=PHL1 OS=Arabidopsis thaliana (Mouse-ear cress) PE=1 SV=1	hypothetical protein JCGZ_16413 [Jatropha curcas]
	VF20511	2459	60.6506	43.4123	41.6497	54.3341	51.6885	42.9353	Decapping 5-like protein GN=DCP5-L OS=Arabidopsis thaliana (Mouse-ear cress) PE=2 SV=1	hypothetical protein JCGZ_06717 [Jatropha curcas]
	VF22529	2459	34.6792	25.5082	26.6775	32.6873	29.1074	21.3059	Importin subunit alpha-9 {ECO:0000305} OS=Arabidopsis thaliana (Mouse-ear cress) PE=3 SV=1	hypothetical protein JCGZ_16476 [Jatropha curcas]
	VFNG6262	2459	2.84838	10.8207	9.31958	11.4153	13.1837	18.1826	#N/A	#N/A
	VF08781	2458	47.722	33.3203	39.006	44.7983	33.0522	29.2752	Glycine-rich RNA-binding protein 8 GN=T22F8.160 OS=Arabidopsis thaliana (Mouse-ear cress) PE=1 SV=1	hypothetical protein JCGZ_13264 [Jatropha curcas]
	VF18594	2457	111.658	77.9684	81.243	102.961	78.0032	84.4409	Rho-N domain-containing protein 1, chloroplastic (Precursor) GN=RHON1 OS=Arabidopsis thaliana (Mouse-ear cress) PE=1 SV=1	hypothetical protein JCGZ_17682 [Jatropha curcas]
	VF27815	2457	64.2989	82.463	85.2117	73.977	86.7924	79.2801	U1 small nuclear ribonucleoprotein 70 kDa GN=RNU1 OS=Arabidopsis thaliana (Mouse-ear cress) PE=1 SV=1	U1 small nuclear ribonucleoprotein 70 kDa, putative [Ricinus communis]
	VF12736	2456	149.847	324.487	293.962	214.851	253.772	277.747	Ethylene-responsive transcription factor RAP2-12 GN=T18A20.14 OS=Arabidopsis thaliana (Mouse-ear cress) PE=1 SV=1	ethylene-responsive transcription factor [Jatropha curcas]
	VF20673	2455	3.83127	1.4994	1.62678	1.42148	2.60006	0.992668	--	hypothetical protein JCGZ_20758 [Jatropha curcas]
	VF26357	2455	22.0806	13.1884	11.6212	20.7772	15.3987	12.2308	Acyl-CoA-binding domain-containing protein 4 GN=ACBP4 OS=Arabidopsis thaliana (Mouse-ear cress) PE=1 SV=1	hypothetical protein JCGZ_11743 [Jatropha curcas]
	VF15109	2454	6.60594	5.48674	4.99033	5.7135	5.16151	3.54783	--	alpha-2,8-sialyltransferase 8b, putative [Ricinus communis]
	VF18652	2454	5.23895	3.83787	4.11721	3.99336	2.9669	2.50079	Probable receptor-like protein kinase At2g23200 (Precursor) GN=At2g23200 OS=Arabidopsis thaliana (Mouse-ear cress) PE=3 SV=1	hypothetical protein JCGZ_12467 [Jatropha curcas]
	VF19278	2454	31.7052	20.2117	20.7656	30.0809	22.459	21.2405	--	hypothetical protein JCGZ_04535 [Jatropha curcas]
	VF06919	2454	3.43422	2.30663	1.60344	2.03988	1.64978	2.03473	Thioredoxin-like protein YLS8 GN=YLS8 OS=Arabidopsis thaliana (Mouse-ear cress) PE=2 SV=1	hypothetical protein PHAVU_006G122000g [Phaseolus vulgaris]
	VF09367	2453	63.2841	79.4348	79.3513	84.7887	89.8973	93.1848	--	hypothetical protein JCGZ_18989 [Jatropha curcas]
	VF12167	2453	12.256	9.21562	9.747	10.0116	11.0678	9.01246	--	3&apos;-5&apos; exonuclease, putative [Ricinus communis]
	VF18082	2453	0.256128	3.31231	2.20294	1.4135	2.06896	4.4732	--	hypothetical protein JCGZ_20871 [Jatropha curcas]
	VF21825	2453	19.9875	15.6525	15.9168	18.2148	17.744	16.3781	F-box/WD-40 repeat-containing protein At3g52030 GN=At3g52030 OS=Arabidopsis thaliana (Mouse-ear cress) PE=2 SV=2	PREDICTED: F-box/WD-40 repeat-containing protein At3g52030 [Populus euphratica]
	VF26379	2453	7.19352	5.92341	6.35549	6.81046	6.45867	5.57165	#N/A	#N/A
	VF24778	2452	62.6477	82.9181	104.122	76.4198	87.0061	93.2369	--	hypothetical protein JCGZ_18048 [Jatropha curcas]
	VF11384	2452	239.813	138.753	152.516	147.982	126.791	150.874	Mitochondrial import inner membrane translocase subunit TIM9 GN=F12A12.80 OS=Arabidopsis thaliana (Mouse-ear cress) PE=1 SV=2	mitochondrial import inner membrane translocase [Jatropha curcas]
	VF28044	2451	3.77218	10.9949	9.35574	6.57029	7.58194	9.30276	Ras-related protein Rab7 OS=Prunus armeniaca (Apricot) PE=2 SV=1	PREDICTED: ras-related protein Rab7 [Vitis vinifera]
	VF09242	2451	94.6456	250.194	289.907	207.428	228.189	218.294	60S ribosomal protein L22-2 GN=RPL22B OS=Arabidopsis thaliana (Mouse-ear cress) PE=2 SV=1	PREDICTED: 60S ribosomal protein L22-2-like [Populus euphratica]
	VF16937	2450	34.0407	69.0095	75.8236	53.538	56.7073	63.2466	--	hypothetical protein JCGZ_26669 [Jatropha curcas]
	VF10448	2449	10.0292	7.70555	6.59801	9.71526	6.92858	6.69514	--	conserved hypothetical protein [Ricinus communis]
	VF19141	2449	8.3136	2.43476	0	0	2.54092	0	#N/A	#N/A
	VF08122	2448	283.471	343.508	332.552	353.81	355.474	357.355	S-adenosylmethionine carrier 1, chloroplastic/mitochondrial (Precursor) GN=F23K16.90 OS=Arabidopsis thaliana (Mouse-ear cress) PE=1 SV=1	mitochondrial carrier protein, putative [Ricinus communis]
	VF24560	2448	68.989	52.4566	57.6871	52.2447	48.4409	41.319	--	hypothetical protein JCGZ_10318 [Jatropha curcas]
	VF03826	2447	5.74873e-06	10.0523	10.9766	2.8547	8.42622	8.15691	Receptor-like protein kinase FERONIA (Precursor) GN=F26O13.190 OS=Arabidopsis thaliana (Mouse-ear cress) PE=1 SV=1	kinase, putative [Ricinus communis]
	VFNG99	2447	7.23847	5.47322	4.41785	6.80587	4.19651	4.28113	--	conserved hypothetical protein [Ricinus communis]
	VF27768	2447	4.88754	1.89686	1.94625	1.12361	1.67582	1.28943	Pentatricopeptide repeat-containing protein At1g08070 GN=PCMP-H12 OS=Arabidopsis thaliana (Mouse-ear cress) PE=2 SV=1	pentatricopeptide repeat-containing protein, putative [Ricinus communis]
	VF22850	2446	66.8074	51.1122	58.1745	53.8155	49.8919	42.134	Receptor-like serine/threonine-protein kinase ALE2 (Precursor) GN=ALE2 OS=Arabidopsis thaliana (Mouse-ear cress) PE=1 SV=1	hypothetical protein JCGZ_17601 [Jatropha curcas]
	VF26172	2446	36.3994	29.3824	28.1404	27.7533	25.8599	19.248	UPF0202 protein At1g10490 GN=At1g10490 OS=Arabidopsis thaliana (Mouse-ear cress) PE=2 SV=2	hypothetical protein JCGZ_09428 [Jatropha curcas]
	VF20229	2446	57.0202	35.1973	40.1602	38.6681	37.5825	39.384	Protein VAC14 homolog GN=VAC14 OS=Arabidopsis thaliana (Mouse-ear cress) PE=1 SV=2	hypothetical protein JCGZ_04757 [Jatropha curcas]
	VF26403	2446	19.548	15.1455	12.939	12.0506	11.1975	10.7538	E3 ubiquitin-protein ligase RING1 GN=RING1 OS=Gossypium hirsutum (Upland cotton) PE=1 SV=1	hypothetical protein JCGZ_11776 [Jatropha curcas]
	VF02165	2445	9.54735	5.39904	7.2306	6.76601	3.87574	4.05083	L-type lectin-domain containing receptor kinase IV.2 (Precursor) GN=F5K20.110 OS=Arabidopsis thaliana (Mouse-ear cress) PE=2 SV=1	PREDICTED: L-type lectin-domain containing receptor kinase IV.1 [Vitis vinifera]
	VFNG644	2445	6.72305e-06	18.7736	21.3269	3.71805	22.8556	19.1376	Subtilisin-like protease (Precursor) GN=At5g67360 OS=Arabidopsis thaliana (Mouse-ear cress) PE=1 SV=1	hypothetical protein JCGZ_12503 [Jatropha curcas]
	VFNG125	2445	4.39152	8.41226	8.80481	9.00434	7.92483	8.72577	#N/A	#N/A
	VF01903	2444	27.1625	22.3413	21.5252	19.8473	19.6308	17.461	Protease Do-like 1, chloroplastic (Precursor) GN=K16N12.18 OS=Arabidopsis thaliana (Mouse-ear cress) PE=1 SV=2	PREDICTED: uncharacterized protein LOC105141704 [Populus euphratica]
	VF21674	2444	10.0016	18.9934	17.5728	15.1328	14.4841	17.0182	Chlorophyll a-b binding protein of LHCII type I, chloroplastic (Precursor) OS=Lemna gibba (Swollen duckweed) PE=3 SV=1	hypothetical protein JCGZ_08016 [Jatropha curcas]
	VF24411	2444	25.6819	20.9693	20.8623	20.9932	19.5857	14.7115	--	hypothetical protein JCGZ_02185 [Jatropha curcas]
	VF27646	2444	14.1848	30.5709	33.2072	20.4506	23.7598	29.495	Equilibrative nucleotide transporter 1 GN=ENT1 OS=Arabidopsis thaliana (Mouse-ear cress) PE=1 SV=1	nucleoside transporter, putative [Ricinus communis]
	VFNG92	2444	1.69237	0.835711	0.776514	1.60362	1.05008	0.768512	--	Bystin, putative [Ricinus communis]
	VF02425	2443	33.9461	16.799	19.769	29.9197	19.3068	20.5366	--	hypothetical protein JCGZ_10190 [Jatropha curcas]
	VF20772	2443	22.638	19.6035	13.9444	19.3737	13.676	12.8219	Transcription factor DIVARICATA GN=DIVARICATA OS=Antirrhinum majus (Garden snapdragon) PE=2 SV=1	hypothetical protein JCGZ_08505 [Jatropha curcas]
	VF07285	2442	66.5145	74.5188	79.2259	71.2631	82.8024	78.4798	Monothiol glutaredoxin-S17 GN=GRXS17 OS=Arabidopsis thaliana (Mouse-ear cress) PE=2 SV=1	glutaredoxin, grx, putative [Ricinus communis]
	VF11958	2442	297.982	369.44	408.778	381.282	348.807	445.535	5-methyltetrahydropteroyltriglutamate--homocysteine methyltransferase GN=METE OS=Catharanthus roseus (Madagascar periwinkle) PE=2 SV=1	hypothetical protein JCGZ_23861 [Jatropha curcas]
	VF15612	2442	13.9454	12.2532	9.5412	11.345	8.73393	8.74099	Pre-mRNA cleavage factor Im 25 kDa subunit 1 {ECO:0000303|PubMed:18479511} OS=Arabidopsis thaliana (Mouse-ear cress) PE=1 SV=1	hypothetical protein JCGZ_07443 [Jatropha curcas]
	VF27237	2442	5.31217	4.21395	3.73573	3.89476	2.98396	2.29838	Pentatricopeptide repeat-containing protein At2g17210 GN=PCMP-E77 OS=Arabidopsis thaliana (Mouse-ear cress) PE=3 SV=2	hypothetical protein JCGZ_25923 [Jatropha curcas]
	VF01638	2441	62.1289	102.159	118.679	82.7912	86.9107	134.052	Dolichyl-diphosphooligosaccharide--protein glycosyltransferase subunit DAD1 GN=DAD1 OS=Citrus unshiu (Satsuma mandarin) PE=3 SV=1	Defender against death (DAD family) protein [Theobroma cacao]
	VF26790	2441	729.545	1456.54	1537.66	1619.73	1853.34	2456.27	Glutaredoxin OS=Vernicia fordii (Tung) PE=3 SV=1	RecName: Full=Glutaredoxin [Vernicia fordii]
	VFNG4973	2441	463.871	307.779	301.027	251.254	250.54	246.918	Glycine-rich protein 2 GN=GRP-2 OS=Nicotiana sylvestris (Wood tobacco) PE=2 SV=1	hypothetical protein POPTR_0009s13460g [Populus trichocarpa]
	VF18341	2440	9.21293	17.7385	17.3163	10.7247	16.4606	16.454	--	hypothetical protein JCGZ_06143 [Jatropha curcas]
	VF07813	2440	65.3184	49.3368	52.1972	51.4386	48.7765	52.0191	Nuclear pore complex protein NUP98A {ECO:0000303|PubMed:21189294} OS=Arabidopsis thaliana (Mouse-ear cress) PE=1 SV=1	hypothetical protein JCGZ_20337 [Jatropha curcas]
	VF11086	2440	44.739	27.0031	30.5649	28.3154	23.1177	27.8936	ABC transporter D family member 2, chloroplastic (Precursor) GN=F20D21.17 OS=Arabidopsis thaliana (Mouse-ear cress) PE=1 SV=1	hypothetical protein JCGZ_06921 [Jatropha curcas]
	VF04302	2438	18.3423	13.1497	13.0443	11.825	9.27918	7.80091	Expansin-A20 (Precursor) GN=F20D10.330 OS=Arabidopsis thaliana (Mouse-ear cress) PE=2 SV=1	hypothetical protein JCGZ_10755 [Jatropha curcas]
	VF17956	2438	10.9493	9.52999	6.84245	8.30987	7.07576	7.25756	Probable WRKY transcription factor 7 GN=WRKY7 OS=Arabidopsis thaliana (Mouse-ear cress) PE=2 SV=1	WRKY transcription factor 42 [Jatropha curcas]
	VF06107	2438	54.8448	86.7556	99.6104	102.117	89.0487	101.553	Protein ASPARTIC PROTEASE IN GUARD CELL 1 (Precursor) GN=ASPG1 OS=Arabidopsis thaliana (Mouse-ear cress) PE=1 SV=1	hypothetical protein JCGZ_14253 [Jatropha curcas]
	VF02182	2437	8.94791	7.58224	6.21841	8.55017	6.75285	5.67009	Guanine nucleotide-binding protein subunit beta-like protein C GN=RACK1C OS=Arabidopsis thaliana (Mouse-ear cress) PE=2 SV=1	hypothetical protein JCGZ_09457 [Jatropha curcas]
	VF16035	2437	1.93584	1.37172	1.40017	1.25048	1.18696	0.754993	--	hypothetical protein JCGZ_23412 [Jatropha curcas]
	VF24493	2437	87.1294	47.8888	23.3239	63.3247	32.9256	45.8996	3-ketoacyl-CoA synthase 17 GN=KCS17 OS=Arabidopsis thaliana (Mouse-ear cress) PE=2 SV=2	hypothetical protein JCGZ_02261 [Jatropha curcas]
	VF25058	2436	40.0101	16.7502	14.944	22.5615	21.3653	22.6662	Thylakoid lumenal 17.9 kDa protein, chloroplastic (Precursor) GN=At4g24930 OS=Arabidopsis thaliana (Mouse-ear cress) PE=1 SV=1	hypothetical protein JCGZ_26439 [Jatropha curcas]
	VF22602	2435	10.2503	7.42421	6.54692	6.25653	5.02299	3.10437	#N/A	#N/A
	VF05938	2434	28.5465	46.3394	42.9537	40.7547	42.5439	40.8476	Probable protein phosphatase 2C 66 OS=Oryza sativa subsp. japonica (Rice) PE=2 SV=1	hypothetical protein JCGZ_19236 [Jatropha curcas]
	VF09350	2434	33.7748	50.4323	59.015	45.396	58.8745	50.5854	Aldehyde dehydrogenase 22A1 (Precursor) GN=ALDH22A1 OS=Arabidopsis thaliana (Mouse-ear cress) PE=2 SV=2	hypothetical protein JCGZ_19003 [Jatropha curcas]
	VF05722	2433	32.7811	96.1017	102.69	51.6507	76.2929	86.0144	Probable voltage-gated potassium channel subunit beta GN=T1G11.6 OS=Arabidopsis thaliana (Mouse-ear cress) PE=1 SV=1	hypothetical protein JCGZ_06420 [Jatropha curcas]
	VF11363	2433	44.8923	38.6907	36.8767	38.14	31.4843	28.881	--	hypothetical protein JCGZ_01561 [Jatropha curcas]
	VF27671	2433	14.4018	6.47907	5.68487	10.8144	9.14051	8.35441	#N/A	#N/A
	VF19469	2433	19.974	15.4924	12.2449	12.686	12.1682	12.6829	--	hypothetical protein JCGZ_21935 [Jatropha curcas]
	VF00891	2432	4.0227	0.591306	0.518545	3.79382	1.19583	0.381217	--	hypothetical protein JCGZ_19233 [Jatropha curcas]
	VF13880	2432	25.8532	19.2051	21.21	21.4327	22.365	20.698	Transcription initiation factor TFIID subunit 4b GN=TAF4B OS=Arabidopsis thaliana (Mouse-ear cress) PE=1 SV=1	hypothetical protein JCGZ_16046 [Jatropha curcas]
	VF23853	2432	40.4591	28.6771	28.3359	29.9601	17.9553	13.3915	Squamosa promoter-binding-like protein 6 GN=SPL6 OS=Arabidopsis thaliana (Mouse-ear cress) PE=2 SV=2	hypothetical protein JCGZ_15739 [Jatropha curcas]
	VFNG1960	2432	3.21714	1.30335	1.65048	2.85204	1.40406	1.58702	Putative ribonuclease H protein At1g65750 GN=At1g65750 OS=Arabidopsis thaliana (Mouse-ear cress) PE=3 SV=1	hypothetical protein [Beta vulgaris subsp. vulgaris]
	VF00559	2431	25.7257	14.24	15.1289	24.3021	16.2207	15.3255	--	hypothetical protein JCGZ_17430 [Jatropha curcas]
	VF25269	2430	77.6886	107.828	111.86	100.262	113.24	101.551	ER membrane protein complex subunit 8/9 homolog GN=EMB2731 OS=Arabidopsis thaliana (Mouse-ear cress) PE=2 SV=1	hypothetical protein JCGZ_01069 [Jatropha curcas]
	VF11262	2429	46.344	29.8645	40.0498	37.4316	34.6945	27.769	Serine/threonine-protein kinase D6PKL2 GN=MCA23.7 OS=Arabidopsis thaliana (Mouse-ear cress) PE=1 SV=1	hypothetical protein JCGZ_14630 [Jatropha curcas]
	VF21775	2429	26.2172	33.2409	35.6624	37.8691	38.4996	40.0277	BTB/POZ and MATH domain-containing protein 4 GN=BPM4 OS=Arabidopsis thaliana (Mouse-ear cress) PE=1 SV=1	hypothetical protein JCGZ_23857 [Jatropha curcas]
	VF09493	2428	6.3719	9.3397	7.92252	8.9741	9.55993	10.2484	Protein phosphatase 2C 37 GN=F24K9.8 OS=Arabidopsis thaliana (Mouse-ear cress) PE=1 SV=1	hypothetical protein EUGRSUZ_G02960 [Eucalyptus grandis]
	VFNG4240	2428	2334.66	1431.42	785.184	1901.95	1563.5	1064.41	Non-specific lipid-transfer protein (Precursor) OS=Gossypium hirsutum (Upland cotton) PE=2 SV=1	hypothetical protein JCGZ_00357 [Jatropha curcas]
	VF16514	2427	20.939	15.0966	6.97123	17.9461	10.0071	7.30412	Probable LRR receptor-like serine/threonine-protein kinase At1g53440 (Precursor) GN=At1g53440 OS=Arabidopsis thaliana (Mouse-ear cress) PE=2 SV=2	hypothetical protein JCGZ_20306 [Jatropha curcas]
	VF08019	2426	29.0392	38.5427	35.6412	36.6	40.8568	47.4141	Probable WRKY transcription factor 19 GN=WRKY19 OS=Arabidopsis thaliana (Mouse-ear cress) PE=2 SV=1	hypothetical protein JCGZ_02409 [Jatropha curcas]
	VF09723	2426	8.68804	7.32688	7.05689	6.70055	7.21086	5.90039	Pentatricopeptide repeat-containing protein At1g51965, mitochondrial (Precursor) GN=At1g51965 OS=Arabidopsis thaliana (Mouse-ear cress) PE=2 SV=1	hypothetical protein POPTR_0013s09950g [Populus trichocarpa]
	VF15289	2426	11.1005	13.1567	17.1445	13.1958	16.7299	17.96	Peptide methionine sulfoxide reductase A5 (Precursor) GN=MSRA5 OS=Arabidopsis thaliana (Mouse-ear cress) PE=2 SV=1	hypothetical protein JCGZ_06508 [Jatropha curcas]
	VF26450	2426	7.36468	22.6688	23.5425	26.5272	26.0802	25.3562	#N/A	#N/A
	VF26604	2426	8.45662	5.55746	4.44797	4.74312	3.36065	4.60899	Reticulon-like protein B9 GN=RTNLB9 OS=Arabidopsis thaliana (Mouse-ear cress) PE=2 SV=1	PREDICTED: reticulon-like protein B9 [Populus euphratica]
	VF18038	2424	16.9632	52.6744	55.8139	64.5165	59.1595	93.5329	--	hypothetical protein JCGZ_16023 [Jatropha curcas]
	VF01966	2423	18.2997	14.6075	13.0779	15.6437	11.3715	13.7726	Cyclin-C1-2 GN=CYCC1-2 OS=Arabidopsis thaliana (Mouse-ear cress) PE=2 SV=1	hypothetical protein JCGZ_15159 [Jatropha curcas]
	VF09317	2423	8.00278	16.8317	24.3876	10.4864	21.9347	22.9403	Acetate/butyrate--CoA ligase AAE7, peroxisomal GN=K14A17.23 OS=Arabidopsis thaliana (Mouse-ear cress) PE=1 SV=1	hypothetical protein JCGZ_18968 [Jatropha curcas]
	VF15155	2423	66.6549	54.4189	57.9146	53.2538	56.7931	52.3384	Eukaryotic translation initiation factor 3 subunit H {ECO:0000255|HAMAP-Rule:MF_03007} GN=TIF3H1 OS=Arabidopsis thaliana (Mouse-ear cress) PE=1 SV=2	hypothetical protein JCGZ_15722 [Jatropha curcas]
	VF16740	2423	46.6715	94.4066	99.4411	68.8853	102.934	84.4955	--	Biotin carboxyl carrier protein of acetyl-CoA carboxylase, putative [Ricinus communis]
	VF28361	2422	47.9437	90.3164	118.36	118.997	139.428	164.207	--	PREDICTED: uncharacterized protein LOC104436511 [Eucalyptus grandis]
	VFNG3045	2422	12.3754	6.51916	6.37228	10.3923	8.11616	8.03472	--	conserved hypothetical protein [Ricinus communis]
	VF26492	2422	2.05062	1.16686	1.01693	1.46148	0.941586	1.33941	Probable serine/threonine-protein kinase At1g18390 (Precursor) GN=At1g18390 OS=Arabidopsis thaliana (Mouse-ear cress) PE=2 SV=2	hypothetical protein JCGZ_09328 [Jatropha curcas]
	VF09691	2421	66.2984	46.8777	48.1831	62.3343	54.357	49.5376	Dynamin-related protein 3A GN=T16L1.140 OS=Arabidopsis thaliana (Mouse-ear cress) PE=1 SV=2	hypothetical protein JCGZ_18767 [Jatropha curcas]
	VF02889	2419	14.6818	23.5555	25.7114	19.5557	27.6152	22.9999	Peroxisome biogenesis protein 7 GN=PEX7 OS=Arabidopsis thaliana (Mouse-ear cress) PE=1 SV=2	hypothetical protein JCGZ_21570 [Jatropha curcas]
	VF06389	2419	11.7741	9.37602	8.58445	8.37863	9.30746	6.41016	--	hypothetical protein RCOM_1667380 [Ricinus communis]
	VF09300	2419	56.3217	36.0131	31.0704	44.5086	39.1012	40.8001	Exonuclease DPD1, chloroplastic/mitochondrial {ECO:0000303|PubMed:21521697} (Precursor) OS=Arabidopsis thaliana (Mouse-ear cress) PE=1 SV=1	PREDICTED: uncharacterized protein LOC102613049 [Citrus sinensis]
	VF01644	2418	63.7423	37.4477	43.6411	51.5986	31.1732	41.7022	Uncharacterized protein At1g04910 GN=At1g04910 OS=Arabidopsis thaliana (Mouse-ear cress) PE=2 SV=1	hypothetical protein JCGZ_25621 [Jatropha curcas]
	VF04081	2418	9.66182	3.43837	2.45163	8.32713	3.23	3.99104	Lupeol synthase OS=Ricinus communis (Castor bean) PE=1 SV=1	hypothetical protein JCGZ_06057 [Jatropha curcas]
	VF11037	2417	5.03327	8.50059	10.178	6.28601	7.66636	9.02017	--	hypothetical protein JCGZ_03505 [Jatropha curcas]
	VF00060	2416	2.30666	0.709438	1.035	1.39337	1.64406	0.83623	--	PREDICTED: transcription factor-like protein DPB [Vitis vinifera]
	VFNG3848	2415	7.64583	5.81125	2.75811	3.92813	2.77148	1.84862	#N/A	#N/A
	VF20068	2414	13.2607	17.2911	17.4122	14.4462	17.4549	16.4549	Probable pre-mRNA-splicing factor ATP-dependent RNA helicase GN=At2g47250 OS=Arabidopsis thaliana (Mouse-ear cress) PE=2 SV=1	hypothetical protein JCGZ_08748 [Jatropha curcas]
	VF02856	2414	28.1988	20.1054	14.8069	19.0998	19.7423	19.0649	Probable complex I intermediate-associated protein 30 GN=At1g17350 OS=Arabidopsis thaliana (Mouse-ear cress) PE=1 SV=2	PREDICTED: uncharacterized protein LOC105107529 isoform X1 [Populus euphratica]
	VF11802	2413	25.7968	49.1204	58.5405	34.6864	44.3799	48.8505	ADP-ribosylation factor 1 GN=ARF1 OS=Brassica rapa subsp. pekinensis (Chinese cabbage) PE=2 SV=3	hypothetical protein JCGZ_07047 [Jatropha curcas]
	VF24637	2413	2.87666	1.5914	1.7056	2.34983	1.58502	1.96695	--	hypothetical protein JCGZ_17943 [Jatropha curcas]
	VF18789	2412	2.42561	1.70197	1.82613	1.49293	1.43398	1.26616	Pentatricopeptide repeat-containing protein At4g25270, chloroplastic (Precursor) GN=PCMP-E53 OS=Arabidopsis thaliana (Mouse-ear cress) PE=3 SV=1	hypothetical protein JCGZ_22909 [Jatropha curcas]
	VF17551	2410	32.7975	59.2549	75.8656	74.3672	69.8737	72.6689	Ocs element-binding factor 1 GN=OBF1 OS=Zea mays (Maize) PE=2 SV=2	Ocs element-binding factor, putative [Ricinus communis]
	VF24224	2409	19.7556	3.01226	2.69967	16.6158	6.05819	5.78966	--	conserved hypothetical protein [Ricinus communis]
	VF16073	2407	19.1965	16.7525	12.8306	15.1654	14.8706	11.2315	--	hypothetical protein JCGZ_23447 [Jatropha curcas]
	VF19280	2407	47.5386	31.6711	33.3458	37.2929	30.9608	36.3501	#N/A	#N/A
	VF11430	2406	10.1075	2.15368	3.16597	8.7615	4.58136	3.53711	--	hypothetical protein JCGZ_21307 [Jatropha curcas]
	VF06678	2404	8.04871	6.41119	3.97524	7.17743	4.9501	4.02024	Hydroxymethylpyrimidine kinase (Precursor) GN=TH1 OS=Arabidopsis thaliana (Mouse-ear cress) PE=1 SV=1	hypothetical protein JCGZ_04989 [Jatropha curcas]
	VF19619	2404	67.7495	24.186	24.3754	67.4174	24.7208	14.8114	#N/A	#N/A
	VF22394	2404	23.7794	15.6253	16.8362	17.6766	19.0328	17.4724	E3 ubiquitin-protein ligase RHF2A GN=RHF2A OS=Arabidopsis thaliana (Mouse-ear cress) PE=2 SV=1	hypothetical protein JCGZ_23898 [Jatropha curcas]
	VF05454	2403	33.007	40.6607	50.0056	42.2517	47.1514	59.4944	Protein STRICTOSIDINE SYNTHASE-LIKE 10 {ECO:0000303|PubMed:10777701} (Precursor) OS=Arabidopsis thaliana (Mouse-ear cress) PE=2 SV=1	hypothetical protein JCGZ_06727 [Jatropha curcas]
	VF11062	2403	37.2648	24.8027	24.6656	29.4831	30.7093	27.3754	DNA replication complex GINS protein PSF2 GN=GINS2 OS=Arabidopsis thaliana (Mouse-ear cress) PE=2 SV=2	hypothetical protein JCGZ_01455 [Jatropha curcas]
	VF12399	2403	1.54693	1.0441	0.755127	1.11543	0.694899	1.00361	LRR receptor-like serine/threonine-protein kinase GSO1 (Precursor) GN=GSO1 OS=Arabidopsis thaliana (Mouse-ear cress) PE=2 SV=1	PREDICTED: receptor-like protein 12 [Sesamum indicum]
	VF15332	2402	14.7661	11.7223	11.1726	13.5608	12.5197	12.3683	--	hypothetical protein JCGZ_08025 [Jatropha curcas]
	VF27873	2402	21.0894	16.2703	18.3756	16.3648	17.5141	15.3818	--	hypothetical protein JCGZ_24093 [Jatropha curcas]
	VF24961	2400	34.4892	43.0487	45.1095	44.7143	40.256	45.2433	--	conserved hypothetical protein [Ricinus communis]
	VF08289	2399	13.3613	8.52828	7.51248	12.4128	8.98994	8.87023	--	conserved hypothetical protein [Ricinus communis]
	VF13780	2399	202.322	294.838	263.356	289.669	281.429	290.704	14-3-3-like protein GF14 kappa GN=GRF8 OS=Arabidopsis thaliana (Mouse-ear cress) PE=1 SV=2	hypothetical protein JCGZ_15866 [Jatropha curcas]
	VF01475	2396	6.12618	14.5675	9.25395	10.8787	12.3431	15.1247	--	conserved hypothetical protein [Ricinus communis]
	VF17722	2396	114.576	192.553	178.973	127.159	182.855	179.466	Proteasome subunit beta type-7-A (Precursor) GN=K1G2.15 OS=Arabidopsis thaliana (Mouse-ear cress) PE=1 SV=2	hypothetical protein JCGZ_10226 [Jatropha curcas]
	VFNG788	2396	8.79116	5.02989	5.47677	6.08263	5.24947	6.17575	--	hypothetical protein L484_000744 [Morus notabilis]
	VF13342	2394	5.83426	1.26432	1.44723	4.23039	1.15505	2.47287	--	hypothetical protein JCGZ_04063 [Jatropha curcas]
	VF19115	2393	44.3312	24.9013	23.8872	38.9145	30.4629	29.0696	DnaJ protein ERDJ3B (Precursor) GN=F26K9.30 OS=Arabidopsis thaliana (Mouse-ear cress) PE=1 SV=1	hypothetical protein JCGZ_21716 [Jatropha curcas]
	VF18707	2393	260.2	527.289	719.526	653.677	607.958	634.792	Mitochondrial import receptor subunit TOM7-1 GN=TOM7-1 OS=Arabidopsis thaliana (Mouse-ear cress) PE=1 SV=1	Mitochondrial import receptor subunit TOM7-1 -like protein [Gossypium arboreum]
	VF20683	2392	7.44292	11.5846	12.8383	8.78335	12.8604	11.5343	Pentatricopeptide repeat-containing protein At1g31430 GN=PCMP-E55 OS=Arabidopsis thaliana (Mouse-ear cress) PE=2 SV=1	hypothetical protein CISIN_1g007077mg [Citrus sinensis]
	VF26295	2392	9.62101	6.01558	6.15787	7.85545	7.75357	6.86898	--	hypothetical protein JCGZ_11686 [Jatropha curcas]
	VF21599	2392	107.022	75.0162	66.5787	88.9688	63.541	79.3311	1,4-alpha-glucan-branching enzyme 1, chloroplastic/amyloplastic (Precursor; Fragment) GN=SBEII OS=Pisum sativum (Garden pea) PE=1 SV=1	hypothetical protein JCGZ_08087 [Jatropha curcas]
	VF04155	2391	20.6377	16.8877	16.2008	15.8135	16.907	12.3222	Splicing factor U2af large subunit B GN=U2AF65B OS=Nicotiana plumbaginifolia (Leadwort-leaved tobacco) PE=2 SV=1	hypothetical protein JCGZ_02367 [Jatropha curcas]
	VF16628	2391	16.9192	1.33653	7.19393	4.02398	1.00578	3.21674	--	conserved hypothetical protein [Ricinus communis]
	VFNG604	2391	0.350356	5.15867	5.01721	3.01702	2.96238	3.93337	--	hypothetical protein JCGZ_20373 [Jatropha curcas]
	VF03838	2390	1.69483	21.6901	26.3997	10.5072	18.9584	17.0871	--	hypothetical protein JCGZ_00629 [Jatropha curcas]
	VF18855	2390	28.2324	9.68761	8.85039	20.0905	15.0143	15.2991	Transcription factor GTE1 GN=F19I3.13 OS=Arabidopsis thaliana (Mouse-ear cress) PE=2 SV=1	hypothetical protein JCGZ_27140 [Jatropha curcas]
	VF05704	2390	2.92487	6.45766	7.04301	5.43534	6.03999	5.47361	Hydroxyethylthiazole kinase GN=THIM OS=Arabidopsis thaliana (Mouse-ear cress) PE=1 SV=1	hypothetical protein JCGZ_06425 [Jatropha curcas]
	VF17687	2389	21.4673	16.6588	15.3197	20.612	14.3387	15.3323	Vacuolar cation/proton exchanger 2 GN=CAX2 OS=Arabidopsis thaliana (Mouse-ear cress) PE=1 SV=2	Vacuolar cation/proton exchanger, putative [Ricinus communis]
	VF23279	2389	9.87434	4.89642	4.61799	9.60562	4.13395	4.09768	B-box zinc finger protein 21 {ECO:0000303|PubMed:19920209} GN=At1g75540 OS=Arabidopsis thaliana (Mouse-ear cress) PE=1 SV=1	Salt-tolerance protein, putative [Ricinus communis]
	VF21486	2388	13.0008	22.7703	19.0823	14.9836	20.221	21.2305	--	hypothetical protein JCGZ_08202 [Jatropha curcas]
	VF01198	2388	56.6837	31.0785	35.6372	35.076	32.1584	36.6272	Calcium-dependent protein kinase 1 GN=MUK11.19 OS=Arabidopsis thaliana (Mouse-ear cress) PE=1 SV=1	calcium-dependent protein kinase, putative [Ricinus communis]
	VF24280	2388	2.72467	0.730451	0.226388	1.48721	0.387975	1.16119	NAC transcription factor 29 GN=At1g69490 OS=Arabidopsis thaliana (Mouse-ear cress) PE=2 SV=1	NAC domain-containing protein, putative [Ricinus communis]
	VF17557	2387	29.7424	45.9683	62.7721	48.9449	44.5517	56.4596	--	hypothetical protein JCGZ_14022 [Jatropha curcas]
	VF27364	2387	1.53424	2.4458	3.51895	3.20642	3.84489	3.66282	--	S-adenosylmethionine-dependent methyltransferase, putative [Ricinus communis]
	VF03557	2386	31.0397	26.5965	27.023	27.56	24.2277	20.7602	Uncharacterized protein At1g51745 GN=At1g51745 OS=Arabidopsis thaliana (Mouse-ear cress) PE=2 SV=2	hypothetical protein JCGZ_24806 [Jatropha curcas]
	VF12088	2385	5.63126	0.883225	0.450039	4.56716	0.926057	1.63625	Subtilisin-like protease SBT5.3 (Precursor) OS=Arabidopsis thaliana (Mouse-ear cress) PE=2 SV=1	hypothetical protein JCGZ_08995 [Jatropha curcas]
	VF12110	2385	26.0206	21.5059	23.4666	23.8665	24.1144	20.9859	#N/A	#N/A
	VF03611	2384	30.6123	44.325	45.768	32.6613	43.6864	43.0067	Inosine-5&apos;-monophosphate dehydrogenase 2 {ECO:0000255|HAMAP-Rule:MF_03156} GN=At1g16350 OS=Arabidopsis thaliana (Mouse-ear cress) PE=1 SV=1	hypothetical protein JCGZ_03791 [Jatropha curcas]
	VF07276	2384	7.12214	6.20014	5.77321	6.2843	6.051	4.61049	DNA mismatch repair protein MSH1, mitochondrial (Precursor) GN=K7M2.9 OS=Arabidopsis thaliana (Mouse-ear cress) PE=1 SV=1	DNA mismatch repair protein muts2, putative [Ricinus communis]
	VF19439	2384	8.5392	6.06058	6.65357	5.82708	6.56384	5.78845	Protein ROOT PRIMORDIUM DEFECTIVE 1 GN=RPD1 OS=Arabidopsis thaliana (Mouse-ear cress) PE=1 SV=1	PREDICTED: protein ROOT PRIMORDIUM DEFECTIVE 1 [Populus euphratica]
	VF25829	2384	2.07828	1.08086	0.055748	1.52632	1.06702	0.254856	Folate transporter 1, chloroplastic GN=FOLT1 OS=Arabidopsis thaliana (Mouse-ear cress) PE=2 SV=1	Mitochondrial folate transporter/carrier [Gossypium arboreum]
	VF01480	2384	20.7408	13.6467	10.4143	13.404	13.247	13.9454	--	hypothetical protein JCGZ_13858 [Jatropha curcas]
	VF02463	2383	52.3518	94.1467	91.7132	55.5081	79.0093	101.04	--	conserved hypothetical protein [Ricinus communis]
	VF19246	2383	37.0374	19.9871	21.4767	35.4107	21.6558	21.3807	Uncharacterized protein At5g08430 GN=At5g08430 OS=Arabidopsis thaliana (Mouse-ear cress) PE=1 SV=2	protein binding protein, putative [Ricinus communis]
	VF13942	2382	9.2444	13.1359	14.3374	11.4335	12.4628	12.3276	Trihelix transcription factor ASIL2 {ECO:0000305} OS=Arabidopsis thaliana (Mouse-ear cress) PE=2 SV=1	hypothetical protein JCGZ_16629 [Jatropha curcas]
	VF11160	2381	11.1046	9.2469	8.44275	9.6846	9.82132	9.27668	Protein DJ-1 homolog C (Precursor) GN=DJ1C OS=Arabidopsis thaliana (Mouse-ear cress) PE=2 SV=1	hypothetical protein JCGZ_01594 [Jatropha curcas]
	VF24033	2381	5.20711	3.10507	1.82038	4.77275	2.41185	2.40915	Chaperonin 60 subunit beta 4, chloroplastic (Precursor) GN=F28B23.11 OS=Arabidopsis thaliana (Mouse-ear cress) PE=1 SV=1	hypothetical protein JCGZ_11805 [Jatropha curcas]
	VF02659	2380	109.723	58.8607	68.7038	75.2868	62.0746	74.876	Coatomer subunit zeta-1 GN=At1g60970 OS=Arabidopsis thaliana (Mouse-ear cress) PE=2 SV=1	PREDICTED: coatomer subunit zeta-1-like [Vitis vinifera]
	VF20885	2379	30.2917	26.3612	24.9014	26.4912	23.927	18.88	--	conserved hypothetical protein [Ricinus communis]
	VF22612	2379	33.287	46.5173	58.8285	51.433	50.1093	71.5374	--	Transcription elongation factor B polypeptide, putative [Ricinus communis]
	VF05020	2378	17.2431	6.4486	7.0897	16.5753	7.82353	6.7671	Putative phospholipid-transporting ATPase 9 GN=ALA9 OS=Arabidopsis thaliana (Mouse-ear cress) PE=3 SV=1	hypothetical protein JCGZ_05833 [Jatropha curcas]
	VF06940	2378	32.6373	25.5119	20.2083	18.961	19.9848	15.7794	--	hypothetical protein JCGZ_00791 [Jatropha curcas]
	VF08947	2378	16.2449	8.34251	9.23727	14.4932	10.0973	10.3233	Probable protein S-acyltransferase 23 GN=PAT23 OS=Arabidopsis thaliana (Mouse-ear cress) PE=2 SV=2	PREDICTED: palmitoyltransferase AKR1-like isoform X1 [Populus euphratica]
	VF11696	2378	41.2562	66.9587	73.1211	47.6316	65.9488	64.0086	Squamosa promoter-binding-like protein 12 GN=SPL12 OS=Arabidopsis thaliana (Mouse-ear cress) PE=1 SV=1	hypothetical protein JCGZ_14095 [Jatropha curcas]
	VF16078	2378	27.3015	20.7704	21.7685	21.5619	23.1689	21.6908	Brefeldin A-inhibited guanine nucleotide-exchange protein 5 GN=F7K15_150 OS=Arabidopsis thaliana (Mouse-ear cress) PE=1 SV=2	hypothetical protein JCGZ_23452 [Jatropha curcas]
	VF13861	2377	1.00161e-05	5.01102	4.02276	4.29207	3.4742	4.10035	--	hypothetical protein JCGZ_21089 [Jatropha curcas]
	VF21762	2377	8.57645	10.2629	10.3583	10.625	10.6667	12.4492	Prolyl 4-hydroxylase 1 (Precursor) GN=P4H1 OS=Arabidopsis thaliana (Mouse-ear cress) PE=1 SV=1	PREDICTED: prolyl 4-hydroxylase subunit alpha-1 isoform X1 [Prunus mume]
	VF28042	2376	79.4677	44.3281	37.3463	68.7259	52.2002	50.4432	Probable chlorophyll(ide) b reductase NYC1, chloroplastic (Precursor) OS=Oryza sativa subsp. japonica (Rice) PE=1 SV=1	hypothetical protein JCGZ_07247 [Jatropha curcas]
	VF04417	2376	5.59034	2.59792	2.67129	2.73386	1.75222	2.87345	#N/A	#N/A
	VF00294	2375	15.9272	25.6596	32.4458	18.8126	32.5036	30.4894	Probable fructokinase-6, chloroplastic (Precursor) OS=Arabidopsis thaliana (Mouse-ear cress) PE=2 SV=1	hypothetical protein JCGZ_25708 [Jatropha curcas]
	VF04897	2375	44.1396	86.4516	106.599	61.7324	71.4587	121.607	--	hypothetical protein JCGZ_07600 [Jatropha curcas]
	VF02762	2374	52.0594	44.3386	48.5115	47.8639	42.5218	41.4823	Probable beta-1,3-galactosyltransferase 20 GN=B3GALT20 OS=Arabidopsis thaliana (Mouse-ear cress) PE=2 SV=1	transferase, transferring glycosyl groups, putative [Ricinus communis]
	VF11154	2374	14.4872	5.35385	3.97939	12.3136	7.92815	6.58278	--	PREDICTED: uncharacterized protein LOC105123234 isoform X4 [Populus euphratica]
	VF12182	2374	120.74	85.1208	90.1319	88.5017	94.3227	90.7139	Uncharacterized protein At5g49945 (Precursor) GN=At5g49945 OS=Arabidopsis thaliana (Mouse-ear cress) PE=2 SV=1	hypothetical protein JCGZ_00221 [Jatropha curcas]
	VF25205	2374	4.80857	2.92638	1.27025	3.37462	2.7694	2.61087	UDP-glycosyltransferase 83A1 GN=UGT83A1 OS=Arabidopsis thaliana (Mouse-ear cress) PE=2 SV=1	hypothetical protein JCGZ_19929 [Jatropha curcas]
	VF02618	2373	52.7116	23.5059	22.2741	51.4378	29.1258	21.3957	--	hypothetical protein JCGZ_11111 [Jatropha curcas]
	VF07204	2373	55.5664	48.0602	46.2008	50.5578	47.3959	36.4206	--	hypothetical protein JCGZ_22246 [Jatropha curcas]
	VF04959	2371	2.87405	2.09382	1.96153	2.14079	1.78822	2.15851	Protein TRANSPARENT TESTA 12 GN=F17J16_80 OS=Arabidopsis thaliana (Mouse-ear cress) PE=2 SV=1	hypothetical protein CISIN_1g011371mg [Citrus sinensis]
	VF23397	2371	41.4166	29.0516	27.7386	31.5468	27.1798	31.8716	DNA-3-methyladenine glycosylase OS=Arabidopsis thaliana (Mouse-ear cress) PE=2 SV=1	hypothetical protein JCGZ_25569 [Jatropha curcas]
	VF01845	2370	60.4515	43.3265	38.5801	57.0314	48.3187	42.5146	Cyanate hydratase {ECO:0000255|HAMAP-Rule:MF_03139} OS=Ricinus communis (Castor bean) PE=3 SV=1	hypothetical protein JCGZ_18639 [Jatropha curcas]
	VF01542	2369	16.4016	13.8525	11.2941	11.9909	11.2628	8.17919	DNA mismatch repair protein PMS1 GN=PMS1 OS=Arabidopsis thaliana (Mouse-ear cress) PE=1 SV=1	hypothetical protein JCGZ_13913 [Jatropha curcas]
	VF03373	2369	18.9565	33.6906	34.1377	32.3142	28.749	31.5224	--	hypothetical protein JCGZ_17514 [Jatropha curcas]
	VF13967	2368	31.3665	21.8462	22.4151	25.7743	27.705	21.5119	Polyadenylation and cleavage factor homolog 4 {ECO:0000305} OS=Arabidopsis thaliana (Mouse-ear cress) PE=1 SV=1	hypothetical protein JCGZ_23616 [Jatropha curcas]
	VF06832	2367	3.40675	6.16862	6.9809	4.60107	6.32522	5.63279	--	hypothetical protein JCGZ_26321 [Jatropha curcas]
	VF08392	2367	322.308	140.32	162.21	233.891	221.148	196.153	Signal peptide peptidase GN=SPP OS=Arabidopsis thaliana (Mouse-ear cress) PE=2 SV=1	hypothetical protein JCGZ_22822 [Jatropha curcas]
	VF00893	2367	141.919	92.6284	99.6195	96.2046	90.8664	100.003	COP9 signalosome complex subunit 6a GN=CSN6A OS=Arabidopsis thaliana (Mouse-ear cress) PE=1 SV=2	signalosome subunit, putative [Ricinus communis]
	VF23054	2367	113.232	371.936	373.26	309.196	367.791	296.776	40S ribosomal protein S16 GN=RPS16 OS=Gossypium hirsutum (Upland cotton) PE=2 SV=1	40S ribosomal protein S16A [Hevea brasiliensis]
	VF25352	2367	135.105	310.483	369.089	316.418	280.926	303.97	60S ribosomal protein L27a-3 OS=Arabidopsis thaliana (Mouse-ear cress) PE=2 SV=2	60S ribosomal protein L27A [Vernicia fordii]
	VF16932	2366	41.3119	33.768	36.0896	36.2095	30.7653	26.2557	--	hypothetical protein JCGZ_26668 [Jatropha curcas]
	VFNG3889	2366	45.4915	32.5936	36.869	32.607	30.9113	31.659	--	hypothetical protein JCGZ_23978 [Jatropha curcas]
	VF21341	2364	117.76	0.855076	0.227302	112.169	17.539	0.193063	Protein trichome birefringence-like 43 GN=TBL43 OS=Arabidopsis thaliana (Mouse-ear cress) PE=2 SV=1	hypothetical protein JCGZ_02074 [Jatropha curcas]
	VF05349	2364	32.8629	27.47	27.5809	25.4749	25.7965	25.5031	Beta-hexosaminidase 1 (Precursor) GN=T26I12.140 OS=Arabidopsis thaliana (Mouse-ear cress) PE=1 SV=1	beta-hexosaminidase, putative [Ricinus communis]
	VF15842	2364	2.43361	1.63537	1.66087	1.95644	1.33994	1.7735	Pentatricopeptide repeat-containing protein At1g09820 GN=At1g09820 OS=Arabidopsis thaliana (Mouse-ear cress) PE=2 SV=1	hypothetical protein JCGZ_23217 [Jatropha curcas]
	VF07853	2364	8.30744	7.16649	6.76893	6.37168	6.61697	6.31838	Probable serine/threonine-protein kinase RLCKVII GN=At1g07870 OS=Arabidopsis thaliana (Mouse-ear cress) PE=2 SV=1	receptor serine-threonine protein kinase, putative [Ricinus communis]
	VF17556	2363	40.5027	26.735	24.287	36.2246	25.3187	29.0675	--	hypothetical protein JCGZ_14023 [Jatropha curcas]
	VF26770	2363	2.45043	5.76513	4.8849	5.11761	6.82923	9.28466	F-box protein SKIP22 GN=SKIP22 OS=Arabidopsis thaliana (Mouse-ear cress) PE=1 SV=1	hypothetical protein JCGZ_16382 [Jatropha curcas]
	VF11479	2362	39.5317	76.327	73.4299	40.9542	65.0394	81.6536	Homogentisate phytyltransferase 1, chloroplastic (Precursor) GN=F19F24.15 OS=Arabidopsis thaliana (Mouse-ear cress) PE=1 SV=1	hypothetical protein JCGZ_10362 [Jatropha curcas]
	VF22638	2362	38.447	26.8139	28.9133	35.3929	29.9803	30.2553	--	hypothetical protein JCGZ_02941 [Jatropha curcas]
	VF22720	2362	43.671	34.5895	29.3776	31.5375	37.5952	28.1959	ATP-dependent zinc metalloprotease FtsH {ECO:0000255|HAMAP-Rule:MF_01458} OS=Cyanidium caldarium PE=3 SV=1	PREDICTED: ATP-dependent zinc metalloprotease FtsH [Populus euphratica]
	VF01783	2361	2.25899	0.620054	0.751092	1.19216	1.36162	1.06426	--	Uncharacterized protein TCM_007931 [Theobroma cacao]
	VF19371	2361	33.7657	14.2937	13.168	28.3008	13.0965	18.3829	WAT1-related protein At1g09380 GN=At1g09380 OS=Arabidopsis thaliana (Mouse-ear cress) PE=2 SV=1	Auxin-induced protein 5NG4, putative [Ricinus communis]
	VF26384	2361	17.3756	8.063	8.79226	15.4714	12.2401	9.04633	ATP-dependent DNA helicase Q-like 5 GN=F28L5.4 OS=Arabidopsis thaliana (Mouse-ear cress) PE=2 SV=2	dead box ATP-dependent RNA helicase, putative [Ricinus communis]
	VF07055	2361	9.78659	7.02599	6.52376	6.63165	7.22894	6.95532	U-box domain-containing protein 5 GN=PUB5 OS=Arabidopsis thaliana (Mouse-ear cress) PE=3 SV=3	hypothetical protein JCGZ_20087 [Jatropha curcas]
	VF05284	2360	14.9255	11.2785	10.703	14.0601	11.4712	11.8964	RINT1-like protein MAG2 {ECO:0000305} OS=Arabidopsis thaliana (Mouse-ear cress) PE=1 SV=1	hypothetical protein JCGZ_11606 [Jatropha curcas]
	VF12020	2360	3.07829	2.33638	1.9164	2.82646	2.55527	1.73435	Pentatricopeptide repeat-containing protein At4g02750 GN=PCMP-H24 OS=Arabidopsis thaliana (Mouse-ear cress) PE=3 SV=1	hypothetical protein JCGZ_12869 [Jatropha curcas]
	VF23450	2360	119.143	74.2767	96.7835	80.4322	78.7312	54.0334	Glycine-rich RNA-binding protein 4, mitochondrial (Precursor) GN=At3g23830 OS=Arabidopsis thaliana (Mouse-ear cress) PE=2 SV=1	hypothetical protein JCGZ_13563 [Jatropha curcas]
	VF28047	2360	34.9601	28.0375	28.37	24.9363	26.8467	23.53	--	hypothetical protein JCGZ_07253 [Jatropha curcas]
	VF12575	2360	15.1303	13.4938	10.7233	13.2253	12.545	12.0838	Protein LOW PSII ACCUMULATION 1, chloroplastic (Precursor) GN=LPA1 OS=Arabidopsis thaliana (Mouse-ear cress) PE=1 SV=1	hypothetical protein JCGZ_16187 [Jatropha curcas]
	VF05708	2359	26.789	33.7938	37.237	34.8391	31.042	36.474	GATA transcription factor 1 GN=GATA1 OS=Arabidopsis thaliana (Mouse-ear cress) PE=2 SV=2	hypothetical protein JCGZ_06429 [Jatropha curcas]
	VF17314	2358	1.10148	1.88532	2.31082	2.13464	1.61344	2.40505	#N/A	#N/A
	VF21569	2358	98.538	284.891	296.265	296.344	256.78	276.426	NADH dehydrogenase [ubiquinone] 1 beta subcomplex subunit 2 GN=At1g76200 OS=Arabidopsis thaliana (Mouse-ear cress) PE=3 SV=1	hypothetical protein POPTR_0002s01410g, partial [Populus trichocarpa]
	VF15519	2356	349.708	527.453	528.396	460.439	453.733	478.043	60S ribosomal protein L31 GN=RPL31 OS=Nicotiana glutinosa (Tobacco) PE=2 SV=1	60S ribosomal protein L31 [Vernicia fordii]
	VF16558	2356	19.256	16.1358	16.2832	15.5561	15.1471	12.2696	Putative nuclear matrix constituent protein 1-like protein GN=At5g65770 OS=Arabidopsis thaliana (Mouse-ear cress) PE=2 SV=1	hypothetical protein JCGZ_12587 [Jatropha curcas]
	VF27615	2356	26.1368	18.6956	19.5863	22.5148	23.3246	17.5427	--	hypothetical protein JCGZ_17815 [Jatropha curcas]
	VF13180	2356	31.4569	43.1921	44.7471	45.9446	44.3714	44.3767	--	hypothetical protein JCGZ_21129 [Jatropha curcas]
	VF00728	2355	30.9177	38.55	42.2761	33.8402	38.6405	38.2295	Eukaryotic initiation factor 4A-7 OS=Nicotiana tabacum (Common tobacco) PE=2 SV=1	hypothetical protein JCGZ_12384 [Jatropha curcas]
	VFNG1763	2355	82.9539	27.6048	38.675	16.263	11.2453	11.9218	Histone H4 OS=Glycine max (Soybean) PE=3 SV=1	Histone H4 [Aegilops tauschii]
	VF04223	2354	3.07948	2.27679	1.84287	1.7084	2.00764	1.13386	Pentatricopeptide repeat-containing protein At5g38730 GN=At5g38730 OS=Arabidopsis thaliana (Mouse-ear cress) PE=2 SV=1	pentatricopeptide repeat-containing protein, putative [Ricinus communis]
	VF28120	2353	8.9321	15.2759	16.4382	10.2412	13.1638	14.9352	--	hypothetical protein JCGZ_08733 [Jatropha curcas]
	VF19569	2352	64.3738	79.4285	84.2286	74.9872	81.5648	104.512	Tryptophan synthase alpha chain, chloroplastic (Precursor) GN=T14E10.210 OS=Arabidopsis thaliana (Mouse-ear cress) PE=1 SV=1	hypothetical protein JCGZ_21847 [Jatropha curcas]
	VF12346	2350	14.9973	26.7368	29.0194	16.5992	26.6051	26.1641	NEDD8-activating enzyme E1 regulatory subunit {ECO:0000305} OS=Arabidopsis thaliana (Mouse-ear cress) PE=1 SV=1	hypothetical protein JCGZ_10346 [Jatropha curcas]
	VF11834	2350	5.46624	3.70036	3.51636	3.80892	3.94625	4.01585	Pentatricopeptide repeat-containing protein At4g31850, chloroplastic (Precursor) GN=PGR3 OS=Arabidopsis thaliana (Mouse-ear cress) PE=1 SV=1	pentatricopeptide repeat-containing protein, putative [Ricinus communis]
	VF06139	2349	45.9042	76.8114	85.6033	59.1533	99.1889	82.0955	Mitochondrial adenine nucleotide transporter ADNT1 OS=Arabidopsis thaliana (Mouse-ear cress) PE=2 SV=1	hypothetical protein JCGZ_14287 [Jatropha curcas]
	VF21477	2349	3.38833	1.44533	0.597228	2.61448	2.17524	1.11261	--	conserved hypothetical protein [Ricinus communis]
	VFNG1390	2349	83.7358	117.669	140.424	147.245	142.04	167.758	Uncharacterized protein At4g28440 GN=At4g28440 OS=Arabidopsis thaliana (Mouse-ear cress) PE=1 SV=1	Nucleic acid-binding, OB-fold-like protein [Theobroma cacao]
	VF19702	2348	3.54496	40.5375	27.8015	13.7499	26.9109	57.6067	--	hypothetical protein JCGZ_12648 [Jatropha curcas]
	VF20193	2348	48.8651	78.9185	95.269	61.7827	72.9573	80.8106	--	hypothetical protein JCGZ_04724 [Jatropha curcas]
	VF21454	2348	28.0233	20.0629	20.5094	19.1526	19.6481	20.0718	ATP-dependent 6-phosphofructokinase 3 {ECO:0000255|HAMAP-Rule:MF_03186} GN=At4g26270 OS=Arabidopsis thaliana (Mouse-ear cress) PE=1 SV=1	hypothetical protein JCGZ_06848 [Jatropha curcas]
	VF04349	2347	6.16359	4.38932	4.79302	3.91248	4.05366	3.20941	Putative pentatricopeptide repeat-containing protein At3g11460 GN=PCMP-H52 OS=Arabidopsis thaliana (Mouse-ear cress) PE=3 SV=1	hypothetical protein JCGZ_06765 [Jatropha curcas]
	VF23258	2347	31.8938	23.2987	20.3579	27.5037	27.538	20.9071	--	hypothetical protein JCGZ_05799 [Jatropha curcas]
	VF20054	2346	13.0868	21.7751	22.4146	13.1497	19.5559	23.7085	Protein Mut11 GN=Mut11 OS=Chlamydomonas reinhardtii (Chlamydomonas smithii) PE=2 SV=1	hypothetical protein JCGZ_09463 [Jatropha curcas]
	VF17338	2345	25.4206	15.6972	17.4524	22.9615	18.3562	18.6098	Protein SHOOT GRAVITROPISM 6 GN=SGR6 OS=Arabidopsis thaliana (Mouse-ear cress) PE=2 SV=1	hypothetical protein JCGZ_16591 [Jatropha curcas]
	VF03208	2344	2.00734	1.14597	0.189097	1.62315	0.720766	0.617903	--	conserved hypothetical protein [Ricinus communis]
	VF09413	2343	22.5213	32.373	30.603	22.7611	29.638	34.2648	Beta-glucosidase-like SFR2, chloroplastic OS=Oryza sativa subsp. japonica (Rice) PE=2 SV=1	hypothetical protein JCGZ_19044 [Jatropha curcas]
	VF27309	2343	45.8897	18.9267	14.0032	30.6231	11.3659	24.6566	--	hypothetical protein JCGZ_22666 [Jatropha curcas]
	VF14290	2342	40.3738	51.8387	50.2029	53.8391	48.069	59.116	F-box protein SKIP5 GN=SKIP5 OS=Arabidopsis thaliana (Mouse-ear cress) PE=1 SV=1	hypothetical protein JCGZ_24514 [Jatropha curcas]
	VF25759	2341	46.407	33.9416	34.3778	44.8699	37.2973	35.7728	Probable S-adenosylmethionine carrier 2, chloroplastic (Precursor) GN=SAMC2 OS=Arabidopsis thaliana (Mouse-ear cress) PE=2 SV=1	hypothetical protein JCGZ_14756 [Jatropha curcas]
	VF21214	2341	77.326	46.0446	37.8344	61.5476	50.8974	53.999	--	Protein C20orf11, putative [Ricinus communis]
	VF04263	2340	84.7059	44.7905	42.7315	74.5382	60.1518	52.0938	Putative SWI/SNF-related matrix-associated actin-dependent regulator of chromatin subfamily A member 3-like 3 GN=At5g43530 OS=Arabidopsis thaliana (Mouse-ear cress) PE=3 SV=1	hypothetical protein JCGZ_01831 [Jatropha curcas]
	VF08883	2340	8.6255	8.88188	9.27115	8.85798	9.38907	9.55354	--	hypothetical protein JCGZ_01497 [Jatropha curcas]
	VF28397	2340	4.05556	3.1132	2.9412	4.04573	3.12594	2.95819	Translationally-controlled tumor protein homolog GN=TCTP OS=Brassica oleracea (Wild cabbage) PE=2 SV=1	translationally-controlled tumor-like protein [Medicago truncatula]
	VF24648	2340	2.46108	3.76434	5.45951	3.46872	4.65402	4.38835	GDP-mannose transporter GONST3 GN=GONST3 OS=Arabidopsis thaliana (Mouse-ear cress) PE=2 SV=1	PREDICTED: GDP-mannose transporter GONST3-like [Populus euphratica]
	VF09404	2339	88.2932	119.951	129.179	118.282	139.039	179.128	--	PREDICTED: ER membrane protein complex subunit 6 [Vitis vinifera]
	VF03101	2338	170.403	95.3375	105.923	167.919	103.056	93.6953	Histone deacetylase 19 GN=F20D10.250 OS=Arabidopsis thaliana (Mouse-ear cress) PE=1 SV=2	hypothetical protein JCGZ_10778 [Jatropha curcas]
	VF04243	2338	17.2975	10.5233	12.8449	13.1296	6.41252	5.20319	UDP-glycosyltransferase 79B6 GN=UGT79B6 OS=Arabidopsis thaliana (Mouse-ear cress) PE=2 SV=1	UDP-glycosyltransferase 1 [Linum usitatissimum]
	VFNG1710	2338	1.80244	1.05334	1.38227	1.06573	0.920018	0.687657	Pentatricopeptide repeat-containing protein At3g03580 GN=PCMP-H23 OS=Arabidopsis thaliana (Mouse-ear cress) PE=2 SV=1	Tetratricopeptide repeat (TPR)-like superfamily protein, putative [Theobroma cacao]
	VF17868	2337	12.1753	6.63938	6.55899	4.62384	2.09262	2.32817	#N/A	#N/A
	VF18041	2337	20.3675	16.7407	17.781	17.09	14.9779	13.219	--	XPA-binding protein, putative [Ricinus communis]
	VF09004	2337	47.0472	12.8082	16.1405	22.5168	18.2566	24.2016	--	hypothetical protein JCGZ_00264 [Jatropha curcas]
	VF01649	2336	13.8705	10.1597	9.67352	12.7091	11.1753	11.0479	Uncharacterized protein At1g15400 GN=At1g15400 OS=Arabidopsis thaliana (Mouse-ear cress) PE=1 SV=2	conserved hypothetical protein [Ricinus communis]
	VF09558	2335	8.78434	7.38443	6.98544	7.54864	6.0344	4.76917	BTB/POZ domain-containing protein At3g05675 GN=At3g05675 OS=Arabidopsis thaliana (Mouse-ear cress) PE=2 SV=1	hypothetical protein JCGZ_08756 [Jatropha curcas]
	VF19440	2334	2570.1	25.2771	8.66014	2490.49	386.115	1.07099	--	hypothetical protein JCGZ_21960 [Jatropha curcas]
	VF08203	2331	4.03815	0.86848	0.841006	0	1.59875	0	Acetyl-CoA acetyltransferase, cytosolic 1 GN=MIF21.12 OS=Arabidopsis thaliana (Mouse-ear cress) PE=2 SV=1	acetyl-CoA acetyltransferase, mitochondrial, putative [Ricinus communis]
	VF18176	2331	23.3177	19.2149	18.677	20.0063	18.3724	12.7285	Valine--tRNA ligase GN=VALRS OS=Arabidopsis thaliana (Mouse-ear cress) PE=2 SV=2	hypothetical protein JCGZ_13438 [Jatropha curcas]
	VF27365	2331	40.7571	25.1278	32.0229	33.8532	31.687	18.5023	3-hydroxyisobutyryl-CoA hydrolase-like protein 5 GN=At1g06550 OS=Arabidopsis thaliana (Mouse-ear cress) PE=1 SV=2	hypothetical protein JCGZ_26646 [Jatropha curcas]
	VF11452	2331	28.3728	12.0592	13.7346	11.796	10.9014	13.6105	#N/A	#N/A
	VF01753	2330	11.9668	10.0199	9.2353	8.57197	8.40515	7.42035	tRNA dimethylallyltransferase 2 GN=IPT2 OS=Arabidopsis thaliana (Mouse-ear cress) PE=1 SV=2	hypothetical protein JCGZ_10905 [Jatropha curcas]
	VF13387	2330	51.3675	41.7749	41.1175	38.3426	38.127	29.2273	Nucleolar complex protein 2 homolog GN=At2g18220 OS=Arabidopsis thaliana (Mouse-ear cress) PE=3 SV=2	hypothetical protein JCGZ_23958 [Jatropha curcas]
	VF13666	2330	11.3661	15.1526	14.5643	15.9263	14.5152	15.8565	Serine/threonine-protein kinase AFC2 GN=AFC2 OS=Arabidopsis thaliana (Mouse-ear cress) PE=1 SV=1	hypothetical protein JCGZ_17834 [Jatropha curcas]
	VF14324	2330	5.54813	4.51205	3.64747	4.32352	4.53473	2.80354	--	Exoenzymes regulatory protein aepA precursor, putative [Ricinus communis]
	VF22217	2330	31.4779	21.8762	24.1519	23.7982	19.1793	10.8523	--	hypothetical protein JCGZ_05561 [Jatropha curcas]
	VF28221	2330	903.875	695.702	471.363	491.311	454.707	253.453	Uncharacterized protein At5g22580 GN=At5g22580 OS=Arabidopsis thaliana (Mouse-ear cress) PE=1 SV=1	hypothetical protein POPTR_0004s19900g [Populus trichocarpa]
	VF21243	2328	21.7594	11.7439	12.3958	21.0199	13.063	12.7818	F-box/LRR-repeat protein At2g42730 GN=At2g42730 OS=Arabidopsis thaliana (Mouse-ear cress) PE=2 SV=1	hypothetical protein JCGZ_12116 [Jatropha curcas]
	VF27179	2328	51.6056	31.0192	25.8532	40.6267	32.9189	36.7606	Zinc finger protein CONSTANS-LIKE 5 GN=COL5 OS=Arabidopsis thaliana (Mouse-ear cress) PE=2 SV=2	hypothetical protein JCGZ_25976 [Jatropha curcas]
	VF01746	2327	58.7493	38.601	41.2551	56.6774	29.7477	24.1474	Protein BUD31 homolog 1 OS=Oryza sativa subsp. japonica (Rice) PE=2 SV=1	PREDICTED: protein BUD31 homolog 2-like isoform X1 [Citrus sinensis]
	VF14465	2326	49.5554	86.6937	71.3529	57.7469	72.4395	93.9267	--	conserved hypothetical protein [Ricinus communis]
	VF15909	2326	98.9558	144.513	152.075	144.294	125.356	145.2	Translationally-controlled tumor protein homolog GN=TCTP OS=Elaeis guineensis var. tenera (Oil palm) PE=2 SV=1	hypothetical protein JCGZ_23304 [Jatropha curcas]
	VFNG2404	2326	3.36007	0.0616505	0	3.03178	1.20906	0.143339	--	PREDICTED: uncharacterized protein LOC104886361 isoform X3 [Beta vulgaris subsp. vulgaris]
	VF10930	2325	24.6489	17.4683	20.613	18.9771	14.461	14.5796	Glutamate receptor 3.2 (Precursor) GN=F23E12.150 OS=Arabidopsis thaliana (Mouse-ear cress) PE=1 SV=2	glutamate receptor 3 plant, putative [Ricinus communis]
	VF20546	2325	63.0357	47.1753	52.4755	45.3932	43.9638	36.0766	--	hypothetical protein JCGZ_13588 [Jatropha curcas]
[truncated: 4,456 more rows]
